# Supplementary material for: Aryne-mediated [2,3]-sigmatropic rearrangement of tertiary 2,3-allenylamines bearing an electron-withdrawing group at the α-position
Source: Royal Society of Chemistry journal article supplement (doi:10.1039/d1ob00887k), 2021-01-01
Supplement: d1ob00887k1.pdf [file d1ob00887k1.pdf]

**Aryne-mediated [2,3]-sigmatropic rearrangement of tertiary 2,3-allenylamines bearing an electron-withdrawing group at the  $\alpha$ -position**

Lu Han, Xue-Ting Zhang, Dong Xie and Shi-Kai Tian\*

Hefei National Laboratory for Physical Sciences at the Microscale, Center for Excellence in Molecular Synthesis (CAS), and Department of Chemistry, University of Science and Technology of China, Hefei, Anhui 230026, China

E-mail: tiansk@ustc.edu.cn

**Supporting information**

**Table of contents**

|                                                                                                              |       |
|--------------------------------------------------------------------------------------------------------------|-------|
| General information .....                                                                                    | S-2   |
| Preparation of tertiary 2,3-allenylamines .....                                                              | S-2   |
| General procedure for the aryne-mediated [2,3]-sigmatropic rearrangement of tertiary 2,3-allenylamines ..... | S-15  |
| A gram-scale reaction .....                                                                                  | S-16  |
| Analytical data for the products (Tables 1-3 and Scheme 3) .....                                             | S-16  |
| References .....                                                                                             | S-24  |
| Copies of NMR spectra .....                                                                                  | S-25  |
| Copies of HPLC traces .....                                                                                  | S-136 |

## General information

The  $^1\text{H}$  NMR and  $^{13}\text{C}$  NMR spectra were recorded on a Bruker AC-400 FT spectrometer or on a Bruker AC-500 FT spectrometer. The chemical shifts of  $^1\text{H}$  NMR and  $^{13}\text{C}$  NMR spectra were referenced internally with tetramethylsilane ( $\delta$  H 0.00 and  $\delta$  C 0.0), or residual protio solvent signals  $\text{CDCl}_3$  ( $\delta$  C 77.2). Chemical shifts ( $\delta$ ) and coupling constants ( $J$ ) were expressed in ppm and Hz, respectively. The following abbreviations are used in reporting NMR data: s, singlet; d, doublet; t, triplet; q, quartet; m, multiplet; br, broad. High resolution mass spectra (HRMS) were recorded on a LC-TOF spectrometer (Micromass). ESI-mass data were acquired using a Thermo LTQ Orbitrap XL instrument equipped with an ESI source and controlled by Xcalibur software. High pressure liquid chromatography (HPLC) analyses were performed on a Hewlett-Packard 1200 Series instrument equipped with an isostatic pump, using a Daicel Chiralpak column (AD-H, OJ, OD,  $250 \times 4.6$  mm) with isopropanol/hexane as the mobile phase, and the UV detection was monitored at 254 nm. Optical rotations were measured on a Perkin-Elmer 343 polarimeter with a sodium lamp at  $\lambda = 589$  nm and reported as  $[\alpha]_{\text{D}}^{T^\circ\text{C}}$  ( $c = \text{g}/100 \text{ mL}$ , solvent).

Chemicals were purchased from Adamas, Energy Chemical, Acros, Accela, Alfa Aesar, and TCI, and used as received.

Abbreviations: Boc = *tert*-butoxycarbonyl, DCE = 1,2-dichloroethane, DCM = dichloromethane, DMF = *N,N*-dimethylformamide, rt = room temperature, TBAF = tetrabutylammonium fluoride, Tf = trifluoromethanesulfonyl, TFA = trifluoroacetic acid, THF = tetrahydrofuran, TMS = trimethylsilyl.

## Preparation of tertiary 2,3-allenylamines

### (1) Preparation of Boc-protected 2,3-allenylamines **S2a** and **S3a**

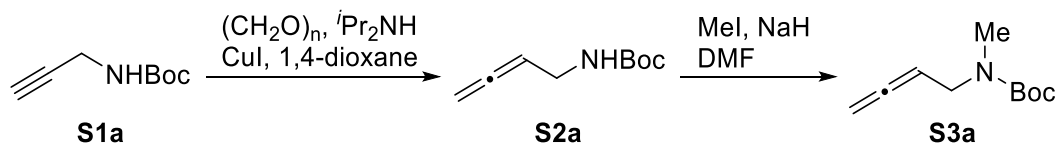

To a solution of  $\text{CuI}$  (4.76 g, 25.0 mmol) in 1,4-dioxane (60 mL) were added *tert*-butyl prop-2-yn-1-ylcarbamate (**S1a**) (7.76 g, 50.0 mmol), diisopropylamine (9.12 g, 90.0 mmol), and paraformaldehyde (3.75 g, 125 mmol). The mixture was stirred under reflux conditions for 2 hours, cooled to room temperature, filtered through a pad of silica gel, and washed with ethyl acetate (30 mL). The solvent was removed under reduced pressure, and the residue was purified by silica gel chromatography, using petroleum ether and ethyl acetate (15:1) as the eluent, to give *tert*-butyl buta-2,3-dien-1-ylcarbamate (**S2a**) (5.50 g, 65% yield) as a colorless oil.  $^1\text{H}$  NMR (500 MHz,  $\text{CDCl}_3$ )  $\delta$  5.23-5.18 (m, 1H), 4.84-4.82 (m, 2H), 4.71 (s, br, 1H), 3.75-3.70 (m, 2H), 1.45 (s, 9H).  $^{13}\text{C}$  NMR (125 MHz,  $\text{CDCl}_3$ )  $\delta$  208.0, 155.8, 88.6, 79.5, 77.5, 38.9, 28.5. HRMS (ESI) calcd for  $\text{C}_9\text{H}_{16}\text{NO}_2^+$  ( $\text{M} + \text{H}$ ) $^+$  170.1176, found 170.1172.

To a solution of compound **S2a** (5.50 g, 32.5 mmol) in dry *N,N*-dimethylformamide (60 mL) at  $0^\circ\text{C}$  was added portionwise  $\text{NaH}$  (1.56 g, 39.0 mmol, 60% dispersion in mineral oil). The mixture was stirred at  $0^\circ\text{C}$  for 30 minutes, added dropwise methyl iodide (5.54 g, 39.0 mmol), and stirred at room temperature for 12 hours. The reaction was quenched with saturated aqueous ammonium chloride (60 mL), extracted with diethyl ether ( $3 \times 60$  mL), washed with brine, dried over anhydrous sodium sulfate, and concentrated under reduced pressure. The residue was purified by silica gel chromatography, using petroleum ether and ethyl acetate (20:1) as the eluent, to give *tert*-butyl buta-2,3-dien-1-

yl(methyl)carbamate (**S3a**) (5.66 g, 95% yield) as a colorless oil. The spectral data of **S3a** are in agreement with those reported in the literature.<sup>1</sup>

(2) Method A

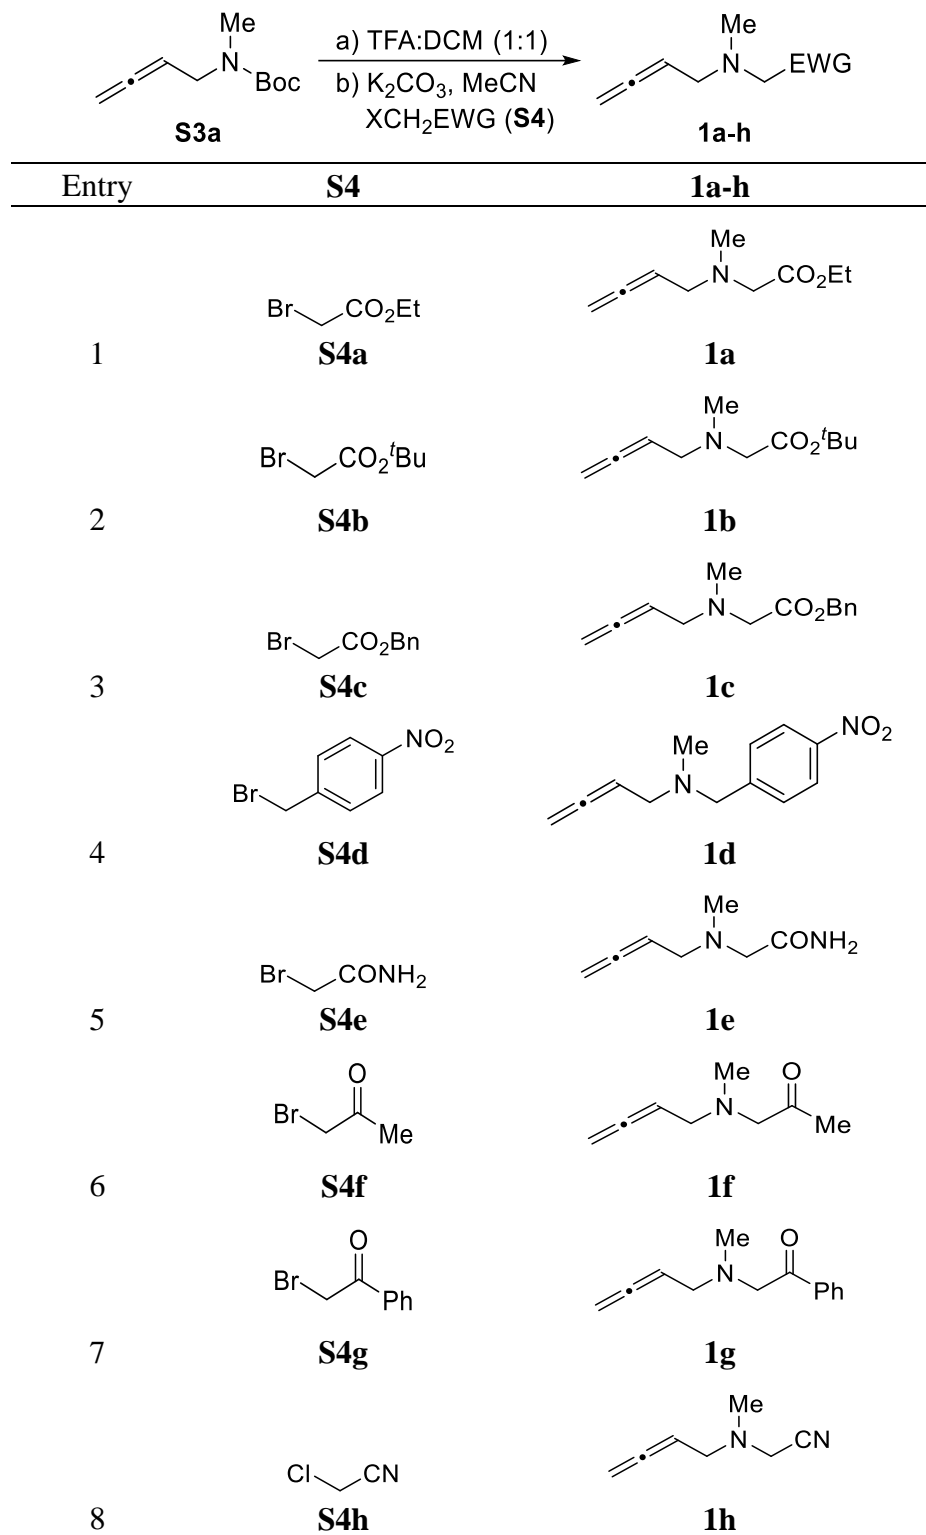

To a solution of *tert*-butyl buta-2,3-dien-1-yl(methyl)carbamate (**S3a**) (916 mg, 5.0 mmol) in

dichloromethane (2.0 mL) at 0 °C was added trifluoroacetic acid (2.0 mL). The mixture was stirred at 0 °C for 30 minutes, and concentrated under reduced pressure. The residue was dissolved in acetonitrile (10.0 mL), cooled to 0 °C, and added portionwise K<sub>2</sub>CO<sub>3</sub> (2.07 g, 15.0 mmol). The mixture was stirred at 0 °C for 10 minutes, and added alkyl halide **S4** (5.0 mmol). The mixture was stirred at room temperature for 8 hours, diluted with water (10 mL), extracted with ethyl acetate (3 × 10 mL), washed with brine, dried over anhydrous sodium sulfate, and concentrated under reduced pressure. The residue was purified by silica gel chromatography, using petroleum ether and ethyl acetate (5:1 to 2:1) as the eluent, to give 2,3-allenylamine **1a-h**.

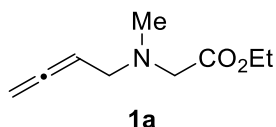

Ethyl *N*-(buta-2,3-dien-1-yl)-*N*-methylglycinate (**1a**) was obtained (677 mg, 80% yield) as a yellow oil. <sup>1</sup>H NMR (400 MHz, CDCl<sub>3</sub>) δ 5.20-5.13 (m, 1H), 4.73-4.72 (m, 2H), 4.19 (q, *J* = 7.2 Hz, 2H), 3.28 (s, 2H), 3.21-3.18 (m, 2H), 2.40 (s, 3H), 1.28 (t, *J* = 7.2 Hz, 3H). <sup>13</sup>C NMR (100 MHz, CDCl<sub>3</sub>) δ 209.7, 170.9, 86.5, 75.0, 60.6, 57.4, 56.1, 42.2, 14.3. HRMS (ESI) calcd for C<sub>9</sub>H<sub>16</sub>NO<sub>2</sub><sup>+</sup> (*M* + *H*)<sup>+</sup> 170.1176, found 170.1177.

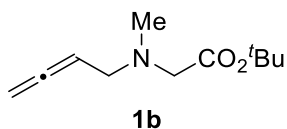

*tert*-Butyl *N*-(buta-2,3-dien-1-yl)-*N*-methylglycinate (**1b**) was obtained (690 mg, 70% yield) as a yellow oil. <sup>1</sup>H NMR (400 MHz, CDCl<sub>3</sub>) δ 5.21-5.14 (m, 1H), 4.74-4.71 (m, 2H), 3.23-3.20 (m, 4H), 2.41 (s, 3H), 1.47 (s, 9H). <sup>13</sup>C NMR (100 MHz, CDCl<sub>3</sub>) δ 209.7, 170.1, 86.7, 81.1, 75.0, 58.1, 56.0, 42.1, 28.3. HRMS (ESI) calcd for C<sub>11</sub>H<sub>20</sub>NO<sub>2</sub><sup>+</sup> (*M* + *H*)<sup>+</sup> 198.1489, found 198.1490.

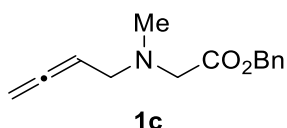

Benzyl *N*-(buta-2,3-dien-1-yl)-*N*-methylglycinate (**1c**) was obtained (833 mg, 72% yield) as a yellow oil. <sup>1</sup>H NMR (400 MHz, CDCl<sub>3</sub>) δ 7.39-7.29 (m, 5H), 5.19-5.12 (m, 3H), 4.71-4.69 (m, 2H), 3.33 (s, 2H), 3.21-3.18 (m, 2H), 2.41 (s, 3H). <sup>13</sup>C NMR (100 MHz, CDCl<sub>3</sub>) δ 209.7, 170.7, 135.8, 128.6, 128.4, 128.3, 86.5, 75.0, 66.3, 57.3, 56.1, 42.2. HRMS (ESI) calcd for C<sub>14</sub>H<sub>18</sub>NO<sub>2</sub><sup>+</sup> (*M* + *H*)<sup>+</sup> 232.1332, found 232.1333.

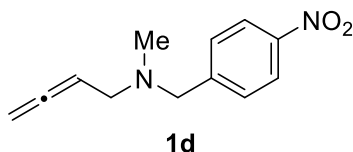

*N*-Methyl-*N*-(4-nitrobenzyl)buta-2,3-dien-1-amine (**1d**) was obtained (949 mg, 87% yield) as a yellow oil. <sup>1</sup>H NMR (400 MHz, CDCl<sub>3</sub>) δ 8.18 (d, *J* = 8.8 Hz, 2H), 7.51 (d, *J* = 8.8 Hz, 2H), 5.23-5.16

(m, 1H), 4.76-4.73 (m, 2H), 3.64 (s, 2H), 3.14-3.11 (m, 2H), 2.26 (s, 3H).  $^{13}\text{C}$  NMR (100 MHz,  $\text{CDCl}_3$ )  $\delta$  209.6, 147.2, 147.1, 129.5, 123.6, 86.6, 75.2, 60.2, 56.2, 42.1. HRMS (ESI) calcd for  $\text{C}_{12}\text{H}_{15}\text{N}_2\text{O}_2^+$  ( $\text{M} + \text{H}$ ) $^+$  219.1128, found 219.1127.

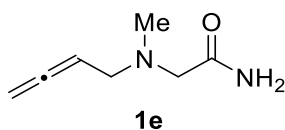

2-(Buta-2,3-dien-1-yl(methyl)amino)acetamide (**1e**) was obtained (406 mg, 58% yield) as a yellow solid. m.p. 50-52 °C.  $^1\text{H}$  NMR (400 MHz,  $\text{CDCl}_3$ )  $\delta$  7.07 (s, br, 1H), 6.38 (s, br, 1H), 5.16-5.09 (m, 1H), 4.78-4.75 (m, 2H), 3.14-3.11 (m, 2H), 3.06 (s, 2H), 2.35 (s, 3H).  $^{13}\text{C}$  NMR (100 MHz,  $\text{CDCl}_3$ )  $\delta$  209.7, 174.5, 86.6, 75.5, 59.9, 56.6, 43.0. HRMS (ESI) calcd for  $\text{C}_7\text{H}_{13}\text{N}_2\text{O}^+$  ( $\text{M} + \text{H}$ ) $^+$  141.1022, found 141.1024.

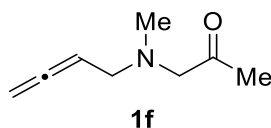

1-(Buta-2,3-dien-1-yl(methyl)amino)propan-2-one (**1f**) was obtained (313 mg, 45% yield) as a yellow oil.  $^1\text{H}$  NMR (400 MHz,  $\text{CDCl}_3$ )  $\delta$  5.20-5.13 (m, 1H), 4.75-4.72 (m, 2H), 3.25 (s, 2H), 3.14-3.11 (m, 2H), 2.33 (s, 3H), 2.16 (s, 3H).  $^{13}\text{C}$  NMR (100 MHz,  $\text{CDCl}_3$ )  $\delta$  209.7, 207.4, 86.6, 75.1, 66.3, 56.7, 42.7, 27.8. HRMS (ESI) calcd for  $\text{C}_8\text{H}_{14}\text{NO}^+$  ( $\text{M} + \text{H}$ ) $^+$  140.1070, found 140.1066.

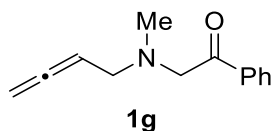

2-(Buta-2,3-dien-1-yl(methyl)amino)-1-phenylethan-1-one (**1g**) was obtained (483 mg, 48% yield) as a yellow oil.  $^1\text{H}$  NMR (400 MHz,  $\text{CDCl}_3$ )  $\delta$  7.99 (d,  $J = 8.0$  Hz, 2H), 7.59-7.55 (m, 1H), 7.48-7.44 (m, 2H), 5.27-5.20 (m, 1H), 4.74-4.72 (m, 2H), 3.90 (s, 2H), 3.28-3.25 (m, 2H), 2.43 (s, 3H).  $^{13}\text{C}$  NMR (100 MHz,  $\text{CDCl}_3$ )  $\delta$  209.9, 197.1, 136.1, 133.4, 128.7, 128.2, 86.4, 75.1, 62.2, 56.7, 42.6. HRMS (ESI) calcd for  $\text{C}_{13}\text{H}_{16}\text{NO}^+$  ( $\text{M} + \text{H}$ ) $^+$  202.1226, found 202.1226.

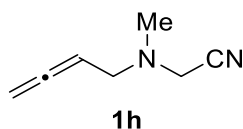

2-(Buta-2,3-dien-1-yl(methyl)amino)acetonitrile (**1h**) was obtained (519 mg, 85% yield) as a yellow oil.  $^1\text{H}$  NMR (400 MHz,  $\text{CDCl}_3$ )  $\delta$  5.14-5.07 (m, 1H), 4.83-4.80 (m, 2H), 3.60 (s, 2H), 3.13-3.12 (m, 2H), 2.42 (s, 3H).  $^{13}\text{C}$  NMR (100 MHz,  $\text{CDCl}_3$ )  $\delta$  209.8, 114.6, 86.4, 76.0, 54.9, 44.1, 42.0. HRMS (ESI) calcd for  $\text{C}_7\text{H}_{11}\text{N}_2^+$  ( $\text{M} + \text{H}$ ) $^+$  123.0917, found 123.0916.

### (3) Method B

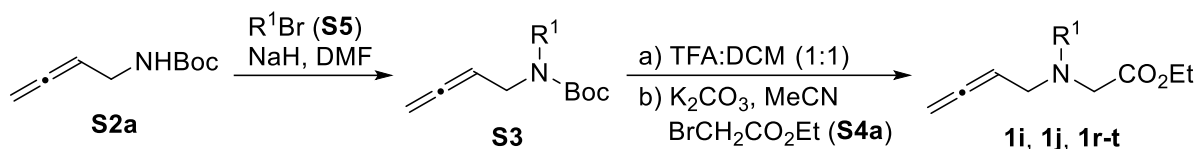

| Entry | S5 | S3 | 1i, 1j, 1r-t |
|-------|----|----|--------------|
| 1     |    |    |              |
| 2     |    |    |              |
| 3     |    |    |              |
| 4     |    |    |              |
| 5     |    |    |              |

To a solution of *tert*-butyl buta-2,3-dien-1-ylcarbamate (**S2a**) (846 mg, 5.0 mmol) in *N,N*-dimethylformamide (10 mL) at 0 °C was added portionwise NaH (240 mg, 6.0 mmol, 60% dispersion in mineral oil). The mixture was stirred at room temperature for 30 minutes, cooled to 0 °C, and added dropwise alkyl halide **S5** (5.0 mmol). The mixture was stirred at room temperature for 8 hours, quenched with saturated aqueous ammonium chloride (10 mL), extracted with diethyl ether (3 × 10 mL), washed with brine (20 mL), dried over anhydrous sodium sulfate, and concentrated under reduced pressure. Crude compound **S3** was used in the next step without purification.

To a solution of crude compound **S3** in dichloromethane (2.0 mL) at 0 °C was added trifluoroacetic acid (2.0 mL). The mixture was stirred at 0 °C for 30 minutes, and concentrated under reduced pressure. The residue was dissolved in acetonitrile (10.0 mL), cooled to 0 °C, and added portionwise K<sub>2</sub>CO<sub>3</sub> (2.07 g, 15.0 mmol). The mixture was stirred at 0 °C for 10 minutes, and added ethyl bromoacetate (**S4a**) (835 mg, 5.0 mmol). The mixture was stirred at room temperature for 8 hours, diluted with water (10 mL), extracted with ethyl acetate (3 × 10 mL), washed with brine, dried over anhydrous sodium sulfate, and concentrated under reduced pressure. The residue was purified by silica gel chromatography, using petroleum ether and ethyl acetate (3:1) as the eluent, to give 2,3-allenylamine **1i**, **1j**, or **1r-1t**.

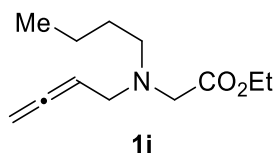

Ethyl *N*-(buta-2,3-dien-1-yl)-*N*-butylglycinate (**1i**) was obtained (687 mg, 65% yield) as a yellow oil. <sup>1</sup>H NMR (400 MHz, CDCl<sub>3</sub>) δ 5.19-5.12 (m, 1H), 4.72-4.71 (m, 2H), 4.18 (q, *J* = 7.2 Hz, 2H), 3.36 (s, 2H), 3.32-3.31 (m, 2H), 2.63-2.59 (m, 2H), 1.48-1.46 (m, 2H), 1.33-1.29 (m, 5H), 0.91 (t, *J* = 7.2 Hz, 3H). <sup>13</sup>C NMR (100 MHz, CDCl<sub>3</sub>) δ 209.8, 171.4, 86.4, 74.9, 60.6, 54.7, 53.9, 53.4, 29.5, 20.6, 14.4, 14.1. HRMS (ESI) calcd for C<sub>12</sub>H<sub>22</sub>NO<sub>2</sub><sup>+</sup> (*M* + *H*)<sup>+</sup> 212.1645, found 212.1644.

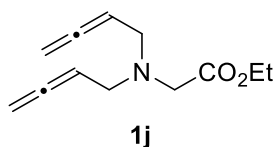

Ethyl di(buta-2,3-dien-1-yl)glycinate (**1j**) was obtained (808 mg, 78% yield) as a yellow oil. <sup>1</sup>H NMR (400 MHz, CDCl<sub>3</sub>) δ 5.19-5.12 (m, 2H), 4.74-4.71 (m, 4H), 4.18 (q, *J* = 7.2 Hz, 2H), 3.39 (s, 2H), 3.34-3.31 (m, 4H), 1.28 (t, *J* = 7.2 Hz, 3H). <sup>13</sup>C NMR (100 MHz, CDCl<sub>3</sub>) δ 209.8, 171.1, 86.4, 74.9, 60.7, 54.0, 53.1, 14.4. HRMS (ESI) calcd for C<sub>12</sub>H<sub>18</sub>NO<sub>2</sub><sup>+</sup> (*M* + *H*)<sup>+</sup> 208.1332, found 208.1331.

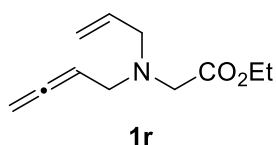

Ethyl *N*-allyl-*N*-(buta-2,3-dien-1-yl)glycinate (**1r**) was obtained (859 mg, 88% yield) as a yellow oil. <sup>1</sup>H NMR (400 MHz, CDCl<sub>3</sub>) δ 5.92-5.82 (m, 1H), 5.18-5.15 (m, 3H), 4.73-4.71 (m, 2H), 4.10 (q, *J* = 7.2 Hz, 2H), 3.28 (s, 2H), 3.33-3.26 (m, 4H), 1.20 (t, *J* = 7.2 Hz, 3H). <sup>13</sup>C NMR (100 MHz, CDCl<sub>3</sub>) δ 209.8, 171.3, 135.1, 118.5, 86.4, 75.0, 60.6, 57.2, 54.0, 53.2, 14.4. HRMS (ESI) calcd for C<sub>11</sub>H<sub>18</sub>NO<sub>2</sub><sup>+</sup> (*M* + *H*)<sup>+</sup> 196.1332, found 196.1334.

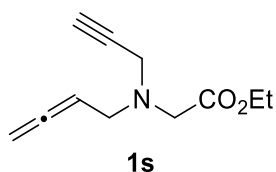

Ethyl *N*-(buta-2,3-dien-1-yl)-*N*-(prop-2-yn-1-yl)glycinate (**1s**) was obtained (841 mg, 87% yield) as a yellow oil. <sup>1</sup>H NMR (400 MHz, CDCl<sub>3</sub>) δ 5.24-5.17 (m, 1H), 4.79-4.76 (m, 2H), 4.21 (q, *J* = 7.2 Hz, 2H), 3.63 (d, *J* = 2.4 Hz, 2H), 3.45 (s, 2H), 3.30-3.28 (m, 2H), 2.26 (t, *J* = 2.4 Hz, 1H), 1.29 (t, *J* = 7.2 Hz, 3H). <sup>13</sup>C NMR (100 MHz, CDCl<sub>3</sub>) δ 210.1, 170.7, 86.9, 78.1, 75.4, 74.0, 60.9, 53.7, 53.3, 42.7, 14.4. HRMS (ESI) calcd for C<sub>11</sub>H<sub>16</sub>NO<sub>2</sub><sup>+</sup> (*M* + *H*)<sup>+</sup> 194.1176, found 194.1179.

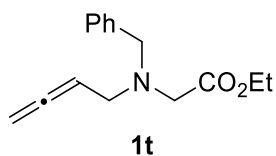

Ethyl *N*-benzyl-*N*-(buta-2,3-dien-1-yl)glycinate (**1t**) was obtained (1.09 g, 89% yield) as a yellow oil. <sup>1</sup>H NMR (400 MHz, CDCl<sub>3</sub>) δ 7.37-7.22 (m, 5H), 5.21-5.14 (m, 1H), 4.73-4.71 (m, 2H), 4.16 (q, *J* = 7.2 Hz, 2H), 3.81 (s, 2H), 3.35 (s, 2H), 3.33-3.30 (m, 2H), 1.26 (t, *J* = 7.2 Hz, 3H). <sup>13</sup>C NMR (100MHz, CDCl<sub>3</sub>) δ 209.8, 171.4, 138.5, 129.2, 128.4, 127.3, 86.9, 75.1, 60.4, 57.6, 53.9, 52.8, 14.4. HRMS (ESI) calcd for C<sub>15</sub>H<sub>20</sub>NO<sub>2</sub><sup>+</sup> (*M* + *H*)<sup>+</sup> 246.1489, found 246.1490.

(4) Method C

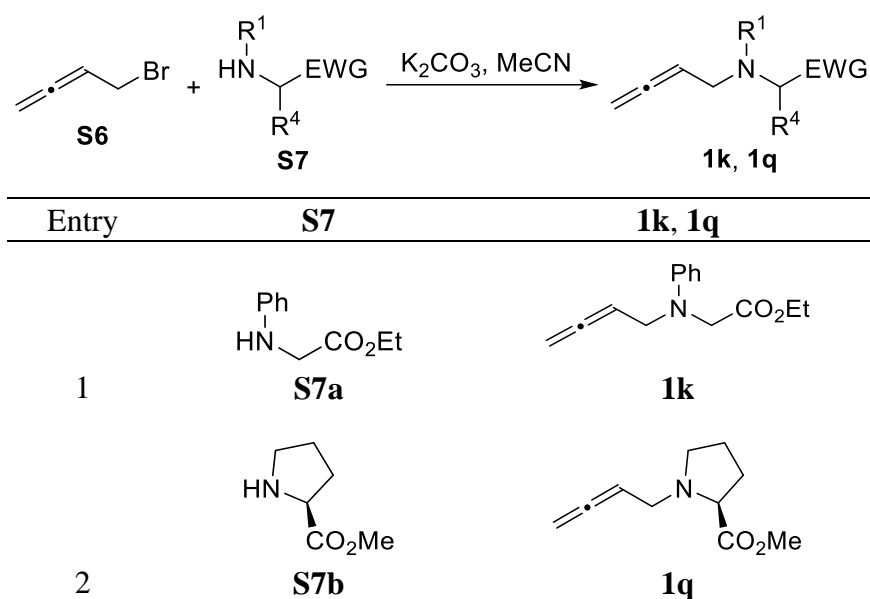

4-Bromobuta-1,2-diene (**S6**) was prepared according to the literature.<sup>2</sup>

To a solution of amine **S7** (5.0 mmol) in acetonitrile (10 mL) were added K<sub>2</sub>CO<sub>3</sub> (830 mg, 6.0 mmol) and 4-bromobuta-1,2-diene (**S6**) (665 mg, 5.0 mmol). The mixture was stirred at room temperature for 8 hours, diluted with water (10 mL), extracted with ethyl acetate (3 × 10 mL), washed with brine, dried over anhydrous sodium sulfate, and concentrated under reduced pressure. The residue was purified by silica gel chromatography, using petroleum ether and ethyl acetate (10:1 to 3:1) as the eluent, to give 2,3-allenylamine **1k** or **1q**.

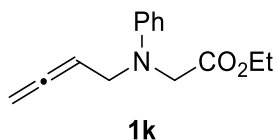

Ethyl *N*-(buta-2,3-dien-1-yl)-*N*-phenylglycinate (**1k**) was obtained (508 mg, 44% yield) as a yellow oil. <sup>1</sup>H NMR (400 MHz, CDCl<sub>3</sub>) δ 7.25-7.20 (m, 2H), 6.76-6.71 (m, 1H), 6.70-6.68 (m, 2H), 5.26-5.21 (m, 1H), 4.78-4.77 (m, 2H), 4.20 (q, *J* = 7.2 Hz, 2H), 4.07-4.04 (m, 4H), 1.26 (t, *J* = 7.2 Hz, 3H). <sup>13</sup>C NMR (100 MHz, CDCl<sub>3</sub>) δ 209.2, 171.3, 147.9, 129.3, 117.8, 112.9, 86.9, 76.4, 61.1, 52.6, 50.7, 14.4. HRMS (ESI) calcd for C<sub>14</sub>H<sub>18</sub>NO<sub>2</sub><sup>+</sup> (*M* + *H*)<sup>+</sup> 232.1332, found 232.1332.



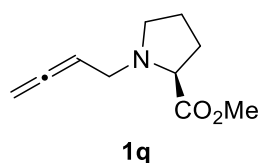

Methyl buta-2,3-dien-1-yl-*L*-prolinate (**1q**) was obtained (589 mg, 65% yield) as a yellow oil. >99% ee.  $[\alpha]_D^{20} = -109$  ( $c = 1.70$ , EtOAc).  $^1\text{H NMR}$  (400 MHz,  $\text{CDCl}_3$ )  $\delta$  5.22-5.19 (m, 1H), 4.73-4.70 (m, 2H), 3.73 (s, 3H), 3.36-3.16 (m, 4H), 2.50-2.48 (m, 1H), 2.16-2.12 (m, 1H), 1.98-1.92 (m, 2H), 1.83-1.80 (m, 1H).  $^{13}\text{C NMR}$  (100 MHz,  $\text{CDCl}_3$ )  $\delta$  209.5, 174.7, 86.7, 75.1, 64.7, 53.3, 53.1, 52.0, 29.7, 23.3. HRMS (ESI) calcd for  $\text{C}_{10}\text{H}_{16}\text{NO}_2^+$  ( $\text{M} + \text{H}$ )<sup>+</sup> 182.1176, found 182.1174.

(5) Method D<sup>3</sup>

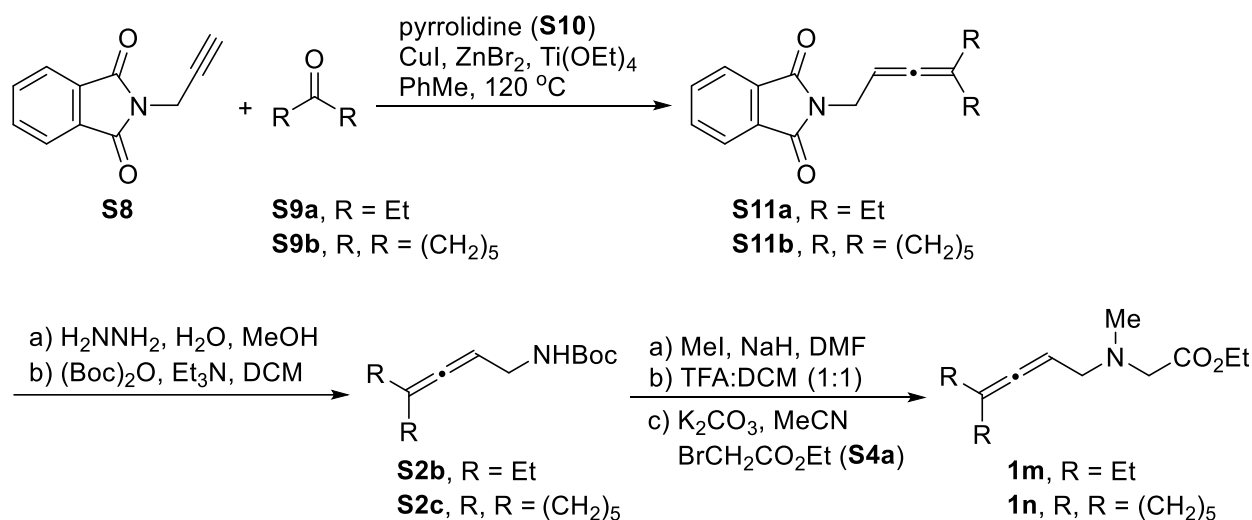

$\text{ZnBr}_2$  (901 mg, 4.0 mmol) was added to a dried Schlenk tube with a stirring bar under nitrogen atmosphere and dried under vacuum with a heating gun. After cooling to room temperature under nitrogen atmosphere, toluene (15 mL),  $\text{CuI}$  (95.2 mg, 0.50 mmol),  $\text{Ti}(\text{OEt})_4$  (2.28 g, 10 mmol), 2-(prop-2-yn-1-yl)isoindoline-1,3-dione (**S8**) (926 mg, 5.0 mmol), ketone **S9** (8.0 mmol), and pyrrolidine (**S10**) (392 mg, 5.5 mmol) were added sequentially. The Schlenk tube was then sealed by screwing the polytetrafluoroethylene plug tightly and placed in a pre-heated oil bath of 120 °C with vigorous stirring for 12 hours. After cooling to room temperature, the crude reaction mixture was filtered through a short pad of basic aluminum oxide eluted with acetone (60 mL). After evaporation, the residue was purified by silica gel chromatography, using petroleum ether and ethyl acetate (10:1) as the eluent, to give protected 2,3-allenylamine **S11**.

To a solution of protected 2,3-allenylamine **S11** (2.5 mmol) in methanol (15 mL) was added hydrazine monohydrate (2.0 mL, 85%). The mixture was stirred at 80 °C (oil bath) for 1 hour, cooled to room temperature, filtered, and concentrated under reduced pressure. The residue was dissolved in dichloromethane (10 mL), cooled to 0 °C, and added triethylamine (304 mg, 3.0 mmol) and *tert*-butyldicarbonate (655 mg, 3.0 mmol). The mixture was stirred at room temperature for 2 hours, concentrated under reduced pressure, and the residue was purified by silica gel column chromatography, using petroleum ether and ethyl acetate (10:1) as the eluent, to give Boc-protected 2,3-allenylamine **S2**.

To a solution of Boc-protected 2,3-allenylamine **S2** (2.5 mmol) in dry *N,N*-dimethylformamide

(10 mL) at 0 °C was added portionwise NaH (120 mg, 3.0 mmol, 60% dispersion in mineral oil). The mixture was stirred at room temperature for 30 minutes, cooled to 0 °C, and added dropwise methyl iodide (426 mg, 3.0 mmol). The mixture was stirred at room temperature for 12 hours, quenched with saturated aqueous ammonium chloride (10 mL), extracted by diethyl ether (3 × 10 mL), washed with brine (20 mL), dried over with anhydrous sodium sulfate, and concentrated under reduced pressure. The residue was dissolved in dichloromethane (1.0 mL), cooled to 0 °C, and added trifluoroacetic acid (1.0 mL). The mixture was stirred at 0 °C for 30 minutes and concentrated under reduced pressure. The residue was dissolved in acetonitrile (5.0 mL), cooled to 0 °C, and added portionwise K<sub>2</sub>CO<sub>3</sub> (1.04 g, 7.5 mmol). The mixture was stirred at 0 °C for 10 minutes, and added ethyl bromoacetate (**S4a**) (420 mg, 2.5 mmol). The mixture was stirred at room temperature for 8 hours, diluted with water (5.0 mL), extracted with ethyl acetate (3 × 5.0 mL), washed with brine, dried over anhydrous sodium sulfate, and concentrated under reduced pressure. The residue was purified by silica gel chromatography, using petroleum ether and ethyl acetate (3:1) as the eluent, to give 2,3-allenylamine **1m** or **1n**.

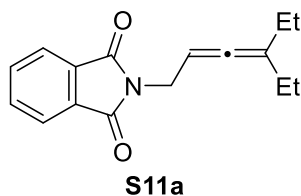

2-(4-Ethylhexa-2,3-dien-1-yl)isoindoline-1,3-dione (**S11a**) was obtained (702 mg, 55% yield) as a colorless oil. <sup>1</sup>H NMR (500 MHz, CDCl<sub>3</sub>) δ 7.87-7.83 (m, 2H), 7.73-7.69 (m, 2H), 5.29-5.24 (m, 1H), 4.27 (d, *J* = 5.0 Hz, 2H), 1.89-1.79 (m, 4H), 0.88 (t, *J* = 7.5 Hz, 6H). <sup>13</sup>C NMR (125 MHz, CDCl<sub>3</sub>) δ 200.1, 168.0, 134.0, 132.4, 123.3, 112.3, 88.8, 37.3, 25.5, 12.1. HRMS (ESI) calcd for C<sub>16</sub>H<sub>18</sub>NO<sub>2</sub><sup>+</sup> (*M* + *H*)<sup>+</sup> 256.1332, found 256.1332.

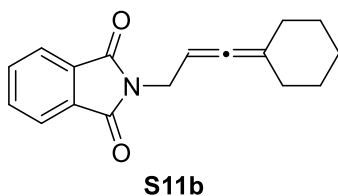

2-(3-Cyclohexylideneallyl)isoindoline-1,3-dione (**S11b**) was obtained (628 mg, 47% yield) as a white solid. The spectral data of **S11b** are in agreement with those reported in the literature.<sup>3</sup>

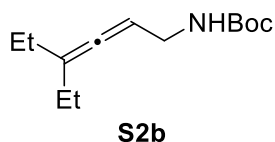

*tert*-Butyl (4-ethylhexa-2,3-dien-1-yl)carbamate (**S2b**) was obtained (558 mg, 99% yield) as a colorless oil. <sup>1</sup>H NMR (500 MHz, CDCl<sub>3</sub>) δ 5.24-5.22 (m, 1H), 4.56 (s, br, 1H), 3.71-3.65 (m, 2H), 2.00-1.95 (m, 4H), 1.45 (s, 9H), 0.99 (t, *J* = 7.5 Hz, 6H). <sup>13</sup>C NMR (125 MHz, CDCl<sub>3</sub>) δ 199.6, 155.9, 111.6, 91.2, 79.3, 39.9, 28.5, 25.7, 12.5. HRMS (ESI) calcd for C<sub>13</sub>H<sub>24</sub>NO<sub>2</sub><sup>+</sup> (*M* + *H*)<sup>+</sup> 226.1802, found 226.1797.

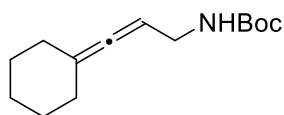

**S2c**

*tert*-Butyl (3-cyclohexylideneallyl)carbamate (**S2c**) was obtained (587 mg, 99% yield) as a colorless oil.  $^1\text{H}$  NMR (500 MHz,  $\text{CDCl}_3$ )  $\delta$  5.04-5.01 (m, 1H), 4.60 (s, br, 1H), 3.69-3.64 (m, 2H), 2.14-2.09 (m, 4H), 1.62-1.50 (m, 6H), 1.45 (s, 9H).  $^{13}\text{C}$  NMR (125 MHz,  $\text{CDCl}_3$ )  $\delta$  197.8, 155.9, 105.9, 87.0, 79.3, 39.9, 31.7, 28.6, 27.6, 26.2. HRMS (ESI) calcd for  $\text{C}_{14}\text{H}_{24}\text{NO}_2^+$  ( $\text{M} + \text{H}$ ) $^+$  238.1802, found 238.1800.

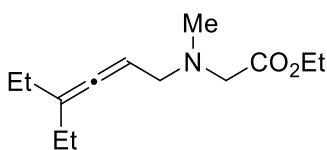

**1m**

Ethyl *N*-(4-ethylhexa-2,3-dien-1-yl)-*N*-methylglycinate (**1m**) was obtained (484 mg, 86% yield) as a yellow oil.  $^1\text{H}$  NMR (400 MHz,  $\text{CDCl}_3$ )  $\delta$  5.23-5.18 (m, 1H), 4.20 (q,  $J = 7.2$  Hz, 2H), 3.32 (s, 2H), 3.18 (d,  $J = 7.2$  Hz, 2H), 2.43 (s, 3H), 1.97-1.95 (m, 4H), 1.28 (t,  $J = 7.2$  Hz, 3H), 1.00 (t,  $J = 7.2$  Hz, 6H).  $^{13}\text{C}$  NMR (100 MHz,  $\text{CDCl}_3$ )  $\delta$  202.0, 171.0, 108.5, 89.4, 60.7, 57.7, 57.4, 42.3, 25.7, 14.4, 12.6. HRMS (ESI) calcd for  $\text{C}_{13}\text{H}_{24}\text{NO}_2^+$  ( $\text{M} + \text{H}$ ) $^+$  226.1802, found 226.1804.

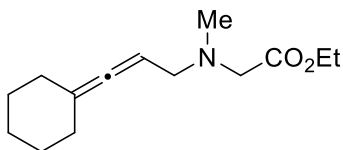

**1n**

Ethyl *N*-(3-cyclohexylideneallyl)-*N*-methylglycinate (**1n**) was obtained (498 mg, 84% yield) as a yellow oil.  $^1\text{H}$  NMR (400 MHz,  $\text{CDCl}_3$ )  $\delta$  5.02-4.97 (m, 1H), 4.21 (q,  $J = 7.2$  Hz, 2H), 3.29 (s, 2H), 3.14 (d,  $J = 7.2$  Hz, 2H), 2.40 (s, 3H), 2.12-2.09 (m, 4H), 1.60-1.52 (m, 6H), 1.28 (t,  $J = 7.2$  Hz, 3H).  $^{13}\text{C}$  NMR (100 MHz,  $\text{CDCl}_3$ )  $\delta$  200.5, 171.1, 102.5, 84.8, 60.7, 57.6, 57.3, 42.3, 31.5, 27.4, 26.2, 14.4. HRMS (ESI) calcd for  $\text{C}_{14}\text{H}_{24}\text{NO}_2^+$  ( $\text{M} + \text{H}$ ) $^+$  238.1802, found 238.1805.

(6) Condition E<sup>4</sup>

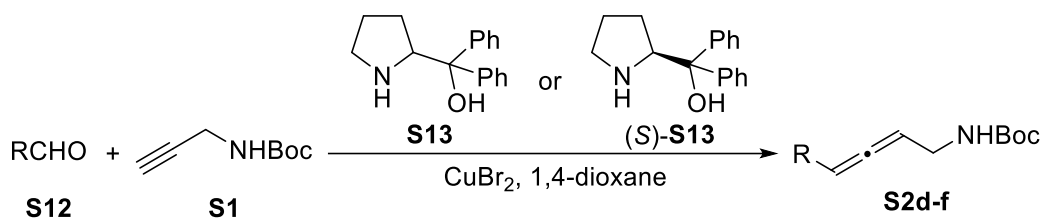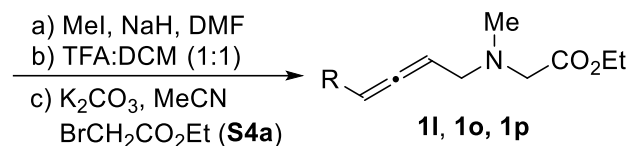

| Entry | <b>S12</b>                                           | <b>S13</b> or ( <i>S</i> )- <b>S13</b> | <b>S2d-f</b>                                                    | <b>1</b>                                                                              |
|-------|------------------------------------------------------|----------------------------------------|-----------------------------------------------------------------|---------------------------------------------------------------------------------------|
| 1     | $n\text{-C}_7\text{H}_{15}\text{CHO}$<br><b>S12a</b> | <b>S13</b>                             | $n\text{-C}_7\text{H}_{15}\text{-CH=CH-CH=NHBoc}$<br><b>S2d</b> | $n\text{-C}_7\text{H}_{15}\text{-CH=CH-CH=N(Me)CH_2\text{CO}_2\text{Et}$<br><b>1l</b> |
| 2     | <br><b>S12b</b>                                      | ( <i>S</i> )- <b>S13</b>               | <br><b>S2e</b>                                                  | <br><b>1o</b>                                                                         |
| 3     | $\text{PhCHO}$<br><b>S12c</b>                        | ( <i>S</i> )- <b>S13</b>               | <br><b>S2f</b>                                                  | <br><b>1p</b>                                                                         |

To a dried Schlenk tube with a stirring bar under nitrogen atmosphere were added  $\text{CuBr}_2$  (223 mg, 1.0 mmol),  $\beta$ -amino alcohol **S13** or (*S*)-**S13** (2.54 g, 10.0 mmol), 1,4-dioxane (20 mL), aldehyde **S12** (15.0 mmol), and *tert*-butyl prop-2-yn-1-ylcarbamate (**S1**) (2.33 g, 15.0 mmol). The Schlenk tube was then sealed by screwing the polytetrafluoroethylene plug tightly. The mixture was stirred in an oil bath preheated at  $130\text{ }^\circ\text{C}$  for 12 hours, cooled to room temperature, diluted with diethyl ether (100 mL), washed with hydrochloric acid (3.0 M, 50 mL), extracted with diethyl ether (100 mL), washed with brine, dried over anhydrous sodium sulfate, and concentrated under reduced pressure. The residue was purified by silica gel chromatography, using petroleum ether and ethyl acetate (10:1) as the eluent, to give Boc-protected 2,3-allenylamine **S2d-f**.

To a solution of Boc-protected 2,3-allenylamine **S2d-f** (5.0 mmol) in dry *N,N*-dimethylformamide (10 mL) at  $0\text{ }^\circ\text{C}$  was added portionwise  $\text{NaH}$  (240 mg, 6.0 mmol, 60% dispersion in mineral oil). The mixture was stirred at room temperature for 30 minutes, cooled to  $0\text{ }^\circ\text{C}$ , and added dropwise methyl iodine (852 mg, 6.0 mmol). The mixture was stirred at room temperature for 12 hours, quenched with saturated aqueous ammonium chloride (10 mL), extracted by diethyl ether ( $3 \times 10\text{ mL}$ ), washed with brine, dried over with anhydrous sodium sulfate, and concentrated under reduced pressure. The residue was dissolved in dichloromethane (2.0 mL), cooled to  $0\text{ }^\circ\text{C}$ , and added trifluoroacetic acid (2.0 mL).

The mixture was stirred at 0 °C for 30 minutes, and concentrated under reduced pressure. The residue was dissolved in acetonitrile (10 mL), cooled to 0 °C, and added portionwise K<sub>2</sub>CO<sub>3</sub> (2.08 g, 15.0 mmol). The mixture was stirred at 0 °C for 10 minutes, and added ethyl bromoacetate (**S4a**) (840 mg, 5.0 mmol). The mixture was stirred at room temperature for 8 hours, diluted with water (10 mL), extracted with ethyl acetate (3 × 10 mL), washed with brine, dried over anhydrous sodium sulfate, and concentrated under reduced pressure. The residue was purified by silica gel chromatography, using petroleum ether and ethyl acetate (3:1) as the eluent, to give 2,3-allenylamine **1l**, **1o**, or **1p**.

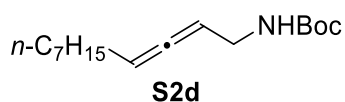

*tert*-Butyl undeca-2,3-dien-1-ylcarbamate (**S2d**) was obtained (1.74 g, 65% yield) as a colorless oil. <sup>1</sup>H NMR (500 MHz, CDCl<sub>3</sub>) δ 5.28-5.23 (m, 1H), 5.18-5.13 (m, 1H), 4.60 (s, br, 1H), 3.71-3.67 (m, 2H), 2.02-1.98 (m, 2H), 1.45 (s, 9H), 1.41-1.37 (m, 2H), 1.35-1.25 (m, 8H), 0.88 (t, *J* = 7.0 Hz, 3H). <sup>13</sup>C NMR (125 MHz, CDCl<sub>3</sub>) δ 203.3, 155.9, 94.3, 89.2, 39.5, 32.0, 29.4, 29.3, 29.2, 28.8, 28.5, 22.8, 14.2. HRMS (ESI) calcd for C<sub>16</sub>H<sub>29</sub>NO<sub>2</sub>Na<sup>+</sup> (*M* + Na)<sup>+</sup> 290.2091, found 290.2091.

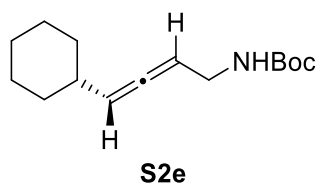

*tert*-Butyl (*R*)-(4-cyclohexylbuta-2,3-dien-1-yl)carbamate (**S2e**) was obtained (1.68 g, 67% yield) as a yellow solid. m.p. 61-63 °C. >99% ee (see below for the ee determination). [α]<sub>D</sub><sup>20</sup> = -11.4 (*c* = 2.10, EtOAc). <sup>1</sup>H NMR (500 MHz, CDCl<sub>3</sub>) δ 5.27-5.24 (m, 1H), 5.22-5.18 (m, 1H), 4.60 (s, br, 1H), 3.72-3.65 (m, 2H), 2.01-1.95 (m, 1H), 1.76-1.70 (m, 4H), 1.65-1.62 (m, 1H), 1.45 (s, 9H), 1.32-1.04 (m, 5H). <sup>13</sup>C NMR (125 MHz, CDCl<sub>3</sub>) δ 202.2, 155.9, 100.3, 90.2, 37.2, 33.2, 33.1, 28.6, 26.2, 26.1. HRMS (ESI) calcd for C<sub>15</sub>H<sub>25</sub>NO<sub>2</sub>Na<sup>+</sup> (*M* + Na)<sup>+</sup> 274.1778, found 274.1777.

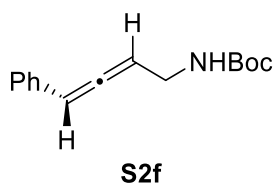

*tert*-Butyl (*R*)-(4-phenylbuta-2,3-dien-1-yl)carbamate (**S2f**) was obtained (1.30 g, 53% yield) as a yellow oil. 98% ee (see below for the ee determination). [α]<sub>D</sub><sup>20</sup> = -250 (*c* = 0.50, EtOAc). <sup>1</sup>H NMR (500 MHz, CDCl<sub>3</sub>) δ 7.31-7.27 (m, 4H), 7.23-7.18 (m, 1H), 6.39-6.27 (m, 1H), 5.66-5.62 (m, 1H), 4.74 (s, br, 1H), 3.90-3.78 (m, 2H), 1.41 (s, 9H). <sup>13</sup>C NMR (125 MHz, CDCl<sub>3</sub>) δ 204.5, 155.8, 134.0, 128.7, 127.3, 127.0, 97.5, 93.6, 79.6, 39.2, 28.5. HRMS (ESI) calcd for C<sub>15</sub>H<sub>19</sub>NO<sub>2</sub>Na<sup>+</sup> (*M* + Na)<sup>+</sup> 268.1308, found 268.1305.

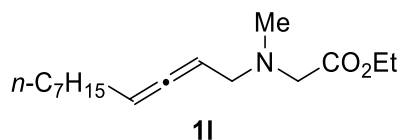

Ethyl *N*-methyl-*N*-(undeca-2,3-dien-1-yl)glycinate (**11**) was obtained (896 mg, 67% yield) as a yellow oil. <sup>1</sup>H NMR (400 MHz, CDCl<sub>3</sub>) δ 5.16-5.09 (m, 2H), 4.19 (q, *J* = 7.2 Hz, 2H), 3.29 (s, 2H), 3.19-3.17 (m, 2H), 2.41 (s, 3H), 2.02-1.96 (m, 2H), 1.44-1.32 (m, 2H), 1.30-1.26 (m, 11H), 0.88 (t, *J* = 6.8 Hz, 3H). <sup>13</sup>C NMR (100 MHz, CDCl<sub>3</sub>) δ 205.6, 170.9, 91.4, 87.1, 60.7, 57.4, 57.0, 42.3, 32.0, 29.3, 29.2, 29.1, 28.8, 22.8, 14.4, 14.2. HRMS (ESI) calcd for C<sub>16</sub>H<sub>30</sub>NO<sub>2</sub><sup>+</sup> (M + H)<sup>+</sup> 268.2271, found 268.2273.

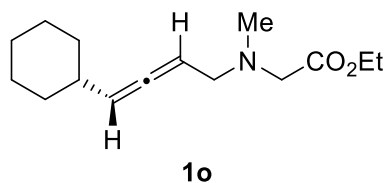

Ethyl (*R*)-*N*-(4-cyclohexylbuta-2,3-dien-1-yl)-*N*-methylglycinate (**10**) was obtained (930 mg, 74% yield) as a yellow oil. >99% ee (see below for the ee determination). [α]<sub>D</sub><sup>20</sup> = -90.0 (*c* = 2.00, EtOAc). <sup>1</sup>H NMR (400 MHz, CDCl<sub>3</sub>) δ 5.20-5.11 (m, 2H), 4.22-4.16 (m, 2H), 3.29 (d, *J* = 2.0 Hz, 2H), 3.18-3.16 (m, 2H), 2.40 (s, 3H), 2.01-1.93 (m, 1H), 1.76-1.69 (m, 4H), 1.65-1.61 (m, 1H), 1.30-1.03 (m, 8H). <sup>13</sup>C NMR (100 MHz, CDCl<sub>3</sub>) δ 204.3, 171.0, 97.3, 88.2, 60.6, 57.4, 57.2, 42.4, 37.2, 33.2, 33.1, 26.2, 26.1, 14.3. HRMS (ESI) calcd for C<sub>15</sub>H<sub>26</sub>NO<sub>2</sub><sup>+</sup> (M + H)<sup>+</sup> 252.1958, found 252.1955.

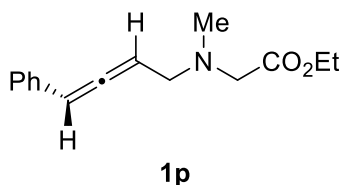

Ethyl (*R*)-*N*-methyl-*N*-(4-phenylbuta-2,3-dien-1-yl)glycinate (**1p**) was obtained (785 mg, 64% yield) as a yellow oil. 98% ee (see below for the ee determination). [α]<sub>D</sub><sup>20</sup> = -269 (*c* = 1.80, EtOAc). <sup>1</sup>H NMR (400 MHz, CDCl<sub>3</sub>) δ 7.33-7.28 (m, 4H), 7.22-7.18 (m, 1H), 6.21-6.18 (m, 1H), 5.62 (q, *J* = 6.8 Hz, 1H), 4.21-4.15 (m, 2H), 3.35-3.32 (m, 4H), 2.47 (s, 3H), 1.26 (t, *J* = 6.8 Hz, 3H). <sup>13</sup>C NMR (100 MHz, CDCl<sub>3</sub>) δ 206.5, 170.8, 134.2, 128.8, 127.1, 126.9, 95.0, 91.3, 60.8, 57.5, 56.3, 42.4, 14.4. HRMS (ESI) calcd for C<sub>15</sub>H<sub>20</sub>NO<sub>2</sub><sup>+</sup> (M + H)<sup>+</sup> 246.1489, found 246.1487.

#### (7) Determination of the ee of compounds **S2e** and **S2f**

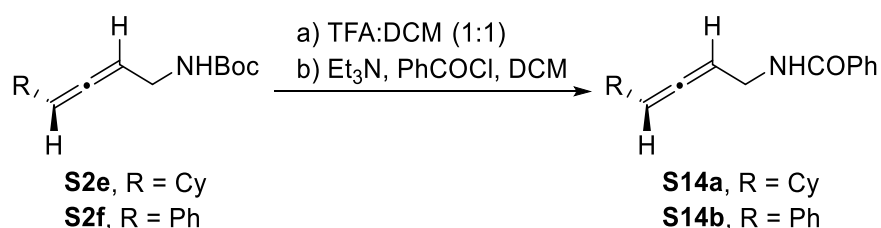

To a solution of Boc-protected 2,3-allenylamine **S2e** or **S2f** (0.20 mmol) in dichloromethane (0.50

mL) at 0 °C was added trifluoroacetic acid (0.50 mL). The mixture was stirred at 0 °C for 30 minutes, and concentrated under reduced pressure. The residue was dissolved in dichloromethane (1.0 mL), cooled to 0 °C, and added triethylamine (60.1 mg, 0.60 mmol) and benzoyl chloride (33.7 mg, 0.24 mmol). The mixture was stirred at room temperature for 1 hour, and concentrated under reduced pressure. The residue was purified by silica gel chromatography, using petroleum ether and ethyl acetate (10:1) as the eluent, to give amide **S14a** or **S14b**.

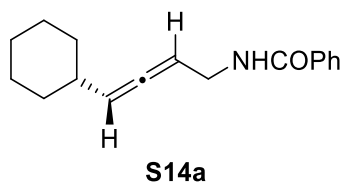

(*R*)-*N*-(4-Cyclohexylbuta-2,3-dien-1-yl)benzamide (**S14a**) was obtained (49.0 mg, 96% yield) as a yellow oil. The ee value was determined to be >99% by chiral stationary phase HPLC analysis [Daicel Chiralpak AD-H, isopropanol/hexane (2:98), 1.0 mL/min,  $\lambda = 254$  nm, tR (major) = 42.4 min, tR (minor) = 37.4 min].  $[\alpha]_D^{20} = -48.4$  ( $c = 1.50$ , EtOAc).  $^1\text{H NMR}$  (500 MHz,  $\text{CDCl}_3$ )  $\delta$  7.78-7.76 (m, 2H), 7.51-7.47 (m, 1H), 7.44-7.41 (m, 2H), 6.37 (s, br, 1H), 5.36-5.31 (m, 2H), 4.07-3.97 (m, 2H), 2.04-1.96 (m, 1H), 1.75-1.68 (m, 4H), 1.64-1.60 (m, 1H), 1.30-1.22 (m, 2H), 1.18-1.02 (m, 3H).  $^{13}\text{C NMR}$  (125 MHz,  $\text{CDCl}_3$ )  $\delta$  202.0, 167.3, 134.6, 131.5, 128.6, 126.9, 100.8, 89.5, 38.4, 37.1, 33.1, 33.0, 26.1, 26.0, 25.9. HRMS (ESI) calcd for  $\text{C}_{17}\text{H}_{22}\text{NO}^+$  ( $\text{M} + \text{H}$ ) $^+$  256.1696, found 256.1693.

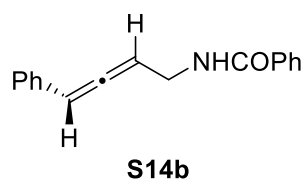

(*R*)-*N*-(4-Phenylbuta-2,3-dien-1-yl)benzamide (**S14b**) was obtained (46.4 mg, 93% yield) as a yellow solid. m.p. 91-93 °C. The ee value was determined to be 98% by chiral stationary phase HPLC analysis [Daicel Chiralpak AD-H, isopropanol/hexane (15:85), 2.0 mL/min,  $\lambda = 254$  nm, tR (major) = 5.2 min, tR (minor) = 4.7 min].  $[\alpha]_D^{20} = -210$  ( $c = 2.30$ , EtOAc).  $^1\text{H NMR}$  (500 MHz,  $\text{CDCl}_3$ )  $\delta$  7.70 (d,  $J = 7.0$  Hz, 2H), 7.47-7.44 (m, 1H), 7.37 (t,  $J = 7.5$  Hz, 2H), 7.32-7.29 (m, 4H), 7.24-7.19 (m, 1H), 6.42 (s, br, 1H), 6.35-6.32 (m, 1H), 5.80-5.76 (m, 1H), 4.18-4.16 (m, 2H).  $^{13}\text{C NMR}$  (125 MHz,  $\text{CDCl}_3$ )  $\delta$  204.7, 167.6, 134.6, 133.8, 131.6, 128.8, 128.7, 127.5, 127.0, 126.9, 97.9, 93.0, 38.4. HRMS (ESI) calcd for  $\text{C}_{17}\text{H}_{16}\text{NO}^+$  ( $\text{M} + \text{H}$ ) $^+$  250.1226, found 250.1223.

### General procedure for the aryne-mediated [2,3]-sigmatropic rearrangement of tertiary 2,3-allenylamines

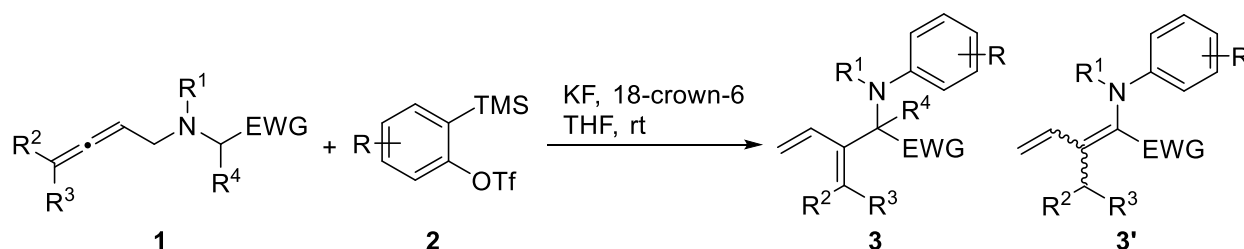

To a mixture of tertiary 2,3-allenylamine **1** (0.20 mmol), KF (23.3mg, 0.40 mmol), and 18-crown-6 (105 mg, 0.40 mmol) in tetrahydrofuran (1.0 mL) was added 2-(trimethylsilyl)aryl triflate **2** (0.24 mmol). The mixture was stirred at room temperature for 3 hours, and concentrated under reduced pressure. The residue was purified by silica gel chromatography, using a mixture of petroleum ether and ethyl acetate (10:1 to 3:1) as the eluent, to give 2-vinylallylamine **3** or 1-amino-1,3-diene **3'**.

The alkene configuration of compounds **3a'**, **3f'**, **3h'**, **3l**, and **3o** was determined by 2D-NOESY spectroscopic analysis.

### A gram-scale reaction

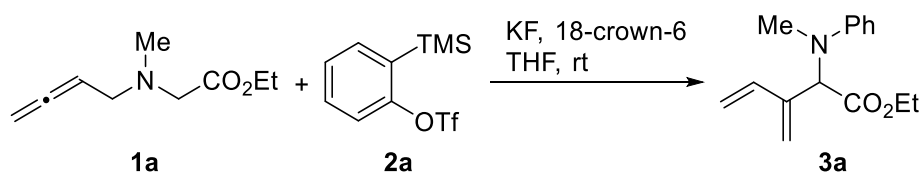

To a mixture of ethyl *N*-(buta-2,3-dien-1-yl)-*N*-methylglycinate (**1a**) (1.02 g, 6.0 mmol), KF (700 mg, 12.0 mmol), and 18-crown-6 (3.17 g, 12.0 mmol) in tetrahydrofuran (30 mL) was added 2-(trimethylsilyl)aryl triflate (**2a**) (2.15 g, 7.2 mmol). The mixture was stirred at room temperature for 3 hours, filtered, washed with ethyl acetate (5.0 mL  $\times$  3), and concentrated under reduced pressure. The residue was purified by silica gel chromatography, using ethyl petroleum ether and acetate (10:1) as the eluent, to give ethyl 2-(methyl(phenyl)amino)-3-methylenepent-4-enoate (**3a**) (1.15 g, 78% yield) as a yellow oil.

### Analytical data for the products (Tables 1-3 and Scheme 3)

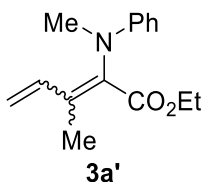

Ethyl 3-methyl-2-(methyl(phenyl)amino)penta-2,4-dienoate (**3a'**) was obtained (39.3 mg, 80% yield, 53:47 *Z/E*) as a yellow oil (Table 1, entry 6).  $^1\text{H}$  NMR (500 MHz,  $\text{CDCl}_3$ ) for the (*Z*)-isomer:  $\delta$  7.22-7.18 (m, 2H), 6.82 (dd,  $J = 17.6, 11.0$  Hz, 1H), 6.79-6.74 (m, 1H), 6.66-6.63 (m, 2H), 5.64-5.55 (m, 1H), 5.39-5.36 (m, 1H), 4.07-4.01 (m, 2H), 3.08 (s, 3H), 2.24 (s, 3H), 0.99 (t,  $J = 7.0$  Hz, 3H).  $^1\text{H}$  NMR (500 MHz,  $\text{CDCl}_3$ ) for the (*E*)-isomer:  $\delta$  7.43 (dd,  $J = 17.5, 11.0$  Hz, 1H), 7.22-7.18 (m, 2H), 6.79-6.74 (m, 1H), 6.66-6.63 (m, 2H), 5.64-5.55 (m, 1H), 5.39-5.36 (m, 1H), 4.07-4.01 (m, 2H), 3.08 (s, 3H), 1.96 (s, 3H), 1.00 (t,  $J = 7.0$  Hz, 3H).  $^{13}\text{C}$  NMR (125 MHz,  $\text{CDCl}_3$ )  $\delta$  167.0, 166.4, 148.7, 148.3, 142.4, 142.3, 135.5, 135.1, 134.6, 134.5, 129.2, 129.1, 119.9, 118.8, 118.1, 117.9, 113.2, 113.1, 60.6, 60.5, 39.8, 38.9, 14.5, 14.1, 13.8. HRMS (ESI) calcd for  $\text{C}_{15}\text{H}_{20}\text{NO}_2^+$  ( $\text{M} + \text{H}$ ) $^+$  246.1489, found 246.1481.



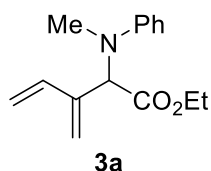

Ethyl 2-(methyl(phenyl)amino)-3-methylenepent-4-enoate (**3a**) was obtained (37.3 mg, 76% yield) as a yellow oil (Table 2, entry 1).  $^1\text{H}$  NMR (400 MHz,  $\text{CDCl}_3$ )  $\delta$  7.28-7.24 (m, 2H), 6.79-6.75 (m, 3H), 6.39 (dd,  $J = 17.6, 11.2$  Hz, 1H), 5.43 (s, 1H), 5.20-5.15 (m, 3H), 5.07 (d,  $J = 11.2$  Hz, 1H), 4.28-4.15 (m, 2H), 2.90 (s, 3H), 1.26 (t,  $J = 7.2$  Hz, 3H).  $^{13}\text{C}$  NMR (100 MHz,  $\text{CDCl}_3$ )  $\delta$  172.0, 149.2, 141.5, 136.7, 129.3, 119.4, 117.5, 115.4, 112.5, 62.8, 61.0, 33.1, 14.3. HRMS (ESI) calcd for  $\text{C}_{15}\text{H}_{20}\text{NO}_2^+$  ( $\text{M} + \text{H}$ ) $^+$  246.1489, found 246.1489.

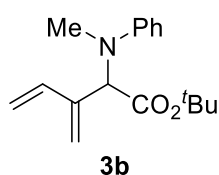

*tert*-Butyl 2-(methyl(phenyl)amino)-3-methylenepent-4-enoate (**3b**) was obtained (35.5 mg, 65% yield) as a yellow oil (Table 2, entry 2).  $^1\text{H}$  NMR (400 MHz,  $\text{CDCl}_3$ )  $\delta$  7.28-7.23 (m, 2H), 6.79-6.73 (m, 3H), 6.38 (dd,  $J = 17.6, 11.2$  Hz, 1H), 5.42 (s, 1H), 5.22 (s, 1H), 5.17 (d,  $J = 17.6$  Hz, 1H), 5.08-5.05 (m, 2H), 2.89 (s, 3H), 1.44 (s, 9H).  $^{13}\text{C}$  NMR (100 MHz,  $\text{CDCl}_3$ )  $\delta$  171.5, 149.5, 141.9, 137.1, 129.4, 119.4, 117.3, 115.4, 112.7, 81.9, 63.5, 33.2, 28.2. HRMS (ESI) calcd for  $\text{C}_{17}\text{H}_{24}\text{NO}_2^+$  ( $\text{M} + \text{H}$ ) $^+$  274.1802, found 274.1804.

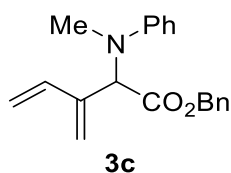

Benzyl 2-(methyl(phenyl)amino)-3-methylenepent-4-enoate (**3c**) was obtained (44.9 mg, 73% yield) as a yellow oil (Table 2, entry 3).  $^1\text{H}$  NMR (400 MHz,  $\text{CDCl}_3$ )  $\delta$  7.35-7.28 (m, 5H), 7.26-7.22 (m, 2H), 6.79-6.75 (m, 3H), 6.36 (dd,  $J = 17.6, 11.2$  Hz, 1H), 5.38 (s, 1H), 5.26 (s, 1H), 5.22-5.14 (m, 3H), 5.07-5.04 (m, 2H), 2.90 (s, 3H).  $^{13}\text{C}$  NMR (100 MHz,  $\text{CDCl}_3$ )  $\delta$  171.9, 149.1, 141.3, 136.8, 135.6, 129.5, 128.7, 128.5, 128.4, 119.8, 117.8, 115.6, 112.8, 66.8, 63.0, 33.3. HRMS (ESI) calcd for  $\text{C}_{20}\text{H}_{22}\text{NO}_2^+$  ( $\text{M} + \text{H}$ ) $^+$  308.1645, found 308.1644.

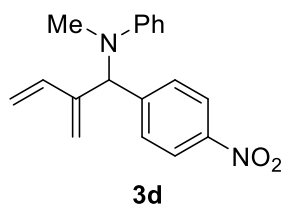

*N*-Methyl-*N*-(2-methylene-1-(4-nitrophenyl)but-3-en-1-yl)aniline (**3d**) was obtained (28.3 mg, 48% yield) as a yellow oil (Table 2, entry 4).  $^1\text{H}$  NMR (400 MHz,  $\text{CDCl}_3$ )  $\delta$  8.21-8.17 (m, 2H), 7.43-7.41

(m, 2H), 7.25-7.20 (m, 2H), 6.76 (t,  $J = 7.2$  Hz, 1H), 6.70 (d,  $J = 8.4$  Hz, 2H), 6.49 (dd,  $J = 17.6, 11.2$  Hz, 1H), 5.72 (s, 1H), 5.45 (s, 1H), 5.10-5.02 (m, 2H), 4.84 (s, 1H), 2.89 (s, 3H).  $^{13}\text{C}$  NMR (100 MHz,  $\text{CDCl}_3$ )  $\delta$  149.1, 148.3, 147.3, 145.0, 137.6, 129.4, 129.3, 123.9, 121.0, 117.5, 115.6, 112.6, 63.6, 33.9. HRMS (ESI) calcd for  $\text{C}_{18}\text{H}_{19}\text{N}_2\text{O}_2^+$  ( $\text{M} + \text{H}$ ) $^+$  295.1441, found 295.1443.

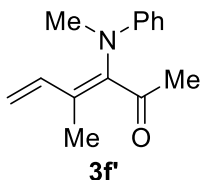

(*Z*)-4-Methyl-3-(methyl(phenyl)amino)hexa-3,5-dien-2-one (**3f'**) was obtained (21.1 mg, 49% yield, >99:1 *Z/E*) as a yellow oil (Table 2, entry 6).  $^1\text{H}$  NMR (500 MHz,  $\text{CDCl}_3$ )  $\delta$  7.25-7.22 (m, 2H), 6.77 (t,  $J = 7.5$  Hz, 1H), 6.61 (d,  $J = 8.0$  Hz, 2H), 6.57 (dd,  $J = 17.5, 11.0$  Hz, 1H), 5.67 (d,  $J = 17.5$  Hz, 1H), 5.43 (d,  $J = 11.0$  Hz, 1H), 3.17 (s, 3H), 2.19 (s, 3H), 1.95 (s, 3H).  $^{13}\text{C}$  NMR (125 MHz,  $\text{CDCl}_3$ )  $\delta$  202.2, 147.7, 141.0, 140.8, 135.6, 129.6, 121.2, 118.0, 112.5, 39.6, 29.1, 13.9. HRMS (ESI) calcd for  $\text{C}_{14}\text{H}_{18}\text{NO}^+$  ( $\text{M} + \text{H}$ ) $^+$  216.1383, found 216.1382.

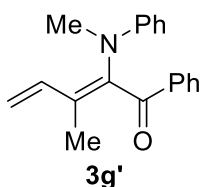

(*Z*)-3-Methyl-2-(methyl(phenyl)amino)-1-phenylpenta-2,4-dien-1-one (**3g'**) was obtained (24.4 mg, 44% yield, >99:1 *Z/E*) as a yellow oil (Table 2, entry 7).  $^1\text{H}$  NMR (400 MHz,  $\text{CDCl}_3$ )  $\delta$  7.66-7.63 (m, 2H), 7.47-7.44 (m, 1H), 7.36-7.32 (m, 2H), 7.16-7.12 (m, 2H), 6.78-6.66 (m, 4H), 5.56 (d,  $J = 17.6$  Hz, 1H), 5.37 (d,  $J = 11.6$  Hz, 1H), 3.14 (s, 3H), 1.97 (s, 3H).  $^{13}\text{C}$  NMR (100 MHz,  $\text{CDCl}_3$ )  $\delta$  197.5, 147.6, 141.0, 139.2, 136.2, 135.4, 132.5, 129.1, 128.5, 128.4, 118.6, 118.5, 114.3, 40.7, 14.9. HRMS (ESI) calcd for  $\text{C}_{19}\text{H}_{20}\text{NO}^+$  ( $\text{M} + \text{H}$ ) $^+$  278.1539, found 278.1539.

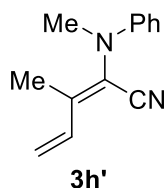

(*E*)-3-Methyl-2-(methyl(phenyl)amino)penta-2,4-dienitrile (**3h'**) was obtained (36.1 mg, 91% yield, 25:75 *Z/E*) as a yellow oil (Table 2, entry 8).  $^1\text{H}$  NMR (400 MHz,  $\text{CDCl}_3$ ) for the (*E*)-isomer:  $\delta$  7.30-7.27 (m, 2H), 7.04 (dd,  $J = 17.2, 10.8$  Hz, 1H), 6.91-6.87 (m, 1H), 6.75-6.73 (m, 2H), 5.69 (d,  $J = 17.2$  Hz, 1H), 5.55 (d,  $J = 10.8$  Hz, 1H), 3.11 (s, 3H), 1.91 (s, 3H).  $^1\text{H}$  NMR (400 MHz,  $\text{CDCl}_3$ ) for the (*Z*)-isomer:  $\delta$  7.30-7.27 (m, 2H), 6.91-6.87 (m, 1H), 6.82 (dd,  $J = 17.6, 10.8$  Hz, 1H), 6.75-6.73 (m, 2H), 5.68-5.64 (m, 1H), 5.46 (d,  $J = 10.8$  Hz, 1H), 3.08 (s, 3H), 2.23 (s, 3H).  $^{13}\text{C}$  NMR (100 MHz,  $\text{CDCl}_3$ )  $\delta$  148.1, 147.6, 146.9, 146.5, 134.1, 131.9, 129.5, 129.4, 122.1, 121.6, 119.9, 119.8, 117.9, 117.3, 116.1, 115.4, 114.4, 114.3, 38.7, 38.3, 15.6, 13.0. HRMS (ESI) calcd for  $\text{C}_{13}\text{H}_{14}\text{N}_2\text{Na}^+$  ( $\text{M} + \text{Na}$ ) $^+$  221.1049, found 221.1049.

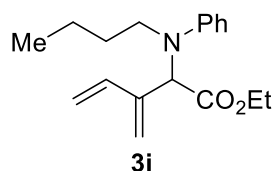

Ethyl 2-(butyl(phenyl)amino)-3-methylenepent-4-enoate (**3i**) was obtained (42.0 mg, 73% yield) as a yellow oil (Table 2, entry 9).  $^1\text{H}$  NMR (400 MHz,  $\text{CDCl}_3$ )  $\delta$  7.26-7.22 (m, 2H), 6.77-6.73 (m, 3H), 6.41 (dd,  $J = 17.6, 11.2$  Hz, 1H), 5.44 (s, 1H), 5.22-5.17 (m, 3H), 5.10 (d,  $J = 11.2$  Hz, 1H), 4.26-4.15 (m, 2H), 3.42-3.20 (m, 2H), 1.62-1.41 (m, 2H), 1.31-1.22 (m, 5H), 0.90 (t,  $J = 7.2$  Hz, 3H).  $^{13}\text{C}$  NMR (100 MHz,  $\text{CDCl}_3$ )  $\delta$  172.2, 148.4, 141.7, 137.2, 129.4, 119.8, 117.5, 115.6, 113.3, 62.9, 61.1, 47.0, 30.3, 20.5, 14.3, 14.0. HRMS (ESI) calcd for  $\text{C}_{18}\text{H}_{26}\text{NO}_2^+$  ( $\text{M} + \text{H}$ ) $^+$  288.1958, found 288.1959.

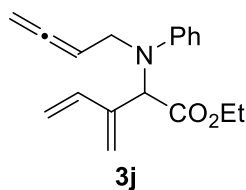

Ethyl 2-(buta-2,3-dien-1-yl(phenyl)amino)-3-methylenepent-4-enoate (**3j**) was obtained (36.8 mg, 65% yield) as a yellow oil (Table 2, entry 10).  $^1\text{H}$  NMR (400 MHz,  $\text{CDCl}_3$ )  $\delta$  7.27-7.22 (m, 2H), 6.84-6.77 (m, 3H), 6.40 (dd,  $J = 17.6, 11.2$  Hz, 1H), 5.46 (s, 1H), 5.24-5.19 (m, 3H), 5.16-5.11 (m, 2H), 4.73-4.70 (m, 2H), 4.27-4.09 (m, 3H), 4.00-3.93 (m, 1H), 1.26 (t,  $J = 7.2$  Hz, 3H).  $^{13}\text{C}$  NMR (100 MHz,  $\text{CDCl}_3$ )  $\delta$  208.6, 172.0, 148.1, 141.5, 136.8, 129.3, 120.1, 118.2, 115.7, 113.7, 89.3, 76.0, 62.6, 61.3, 46.2, 14.3. HRMS (ESI) calcd for  $\text{C}_{18}\text{H}_{22}\text{NO}_2^+$  ( $\text{M} + \text{H}$ ) $^+$  284.1645, found 284.1645.

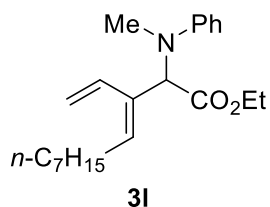

Ethyl (*E*)-2-(methyl(phenyl)amino)-3-vinylundec-3-enoate (**3l**) was obtained (61.8 mg, 90% yield, 10:90 *Z/E*) as a yellow oil (Table 2, entry 12).  $^1\text{H}$  NMR (400 MHz,  $\text{CDCl}_3$ ) for the (*E*)-isomer:  $\delta$  7.26-7.22 (m, 2H), 6.77-6.72 (m, 3H), 6.68 (dd,  $J = 17.6, 11.2$  Hz, 1H), 5.51 (t,  $J = 7.2$  Hz, 1H), 5.22 (s, 1H), 5.11-5.05 (m, 2H), 4.26-4.16 (m, 2H), 2.88 (s, 3H), 2.35-2.21 (m, 2H), 1.47-1.40 (m, 2H), 1.33-1.21 (m, 11H), 0.89 (t,  $J = 6.8$  Hz, 3H).  $^1\text{H}$  NMR for the (*Z*)-isomer:  $\delta$  7.26-7.22 (m, 2H), 6.77-6.72 (m, 3H), 6.28 (dd,  $J = 17.6, 11.2$  Hz, 1H), 5.92 (t,  $J = 7.6$  Hz, 1H), 5.20 (s, 1H), 5.19-5.15 (m, 1H), 4.95 (d,  $J = 11.2$  Hz, 1H), 4.20-4.09 (m, 2H), 2.89 (s, 3H), 2.12-1.99 (m, 2H), 1.47-1.40 (m, 2H), 1.33-1.21 (m, 11H), 0.89 (t,  $J = 6.8$  Hz, 3H).  $^{13}\text{C}$  NMR (100 MHz,  $\text{CDCl}_3$ ) for the (*E*)-isomer:  $\delta$  172.7, 149.4, 135.2, 132.2, 131.5, 129.4, 117.3, 115.0, 112.5, 63.7, 60.9, 32.8, 31.9, 29.5, 29.3, 29.2, 27.9, 22.8, 14.4, 14.2. Partial  $^{13}\text{C}$  NMR for the (*Z*)-isomer:  $\delta$  149.6, 138.8, 138.2, 132.8, 129.3, 117.7, 113.1, 112.9, 61.2, 60.7, 34.1, 31.9, 29.4, 28.5, 14.3. HRMS (ESI) calcd for  $\text{C}_{22}\text{H}_{34}\text{NO}_2^+$  ( $\text{M} + \text{H}$ ) $^+$  344.2584, found 344.2586.

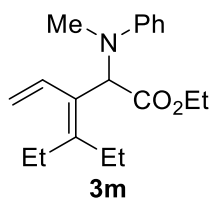

Ethyl 4-ethyl-2-(methyl(phenyl)amino)-3-vinylhex-3-enoate (**3m**) was obtained (38.0 mg, 63% yield) as a yellow oil (Table 2, entry 13). <sup>1</sup>H NMR (400 MHz, CDCl<sub>3</sub>) δ 7.27-7.20 (m, 2H), 6.76-6.72 (m, 3H), 6.52 (dd, *J* = 17.6, 11.6 Hz, 1H), 5.24 (s, 1H), 5.22-5.10 (m, 2H), 4.19-4.06 (m, 2H), 2.92 (s, 3H), 2.39-2.20 (m, 2H), 2.13-1.99 (m, 2H), 1.19 (t, *J* = 7.2 Hz, 3H), 1.04 (t, *J* = 7.6 Hz, 3H), 0.98 (t, *J* = 7.6 Hz, 3H). <sup>13</sup>C NMR (100 MHz, CDCl<sub>3</sub>) δ 173.0, 150.5, 149.5, 134.6, 129.3, 126.2, 117.3, 115.8, 112.7, 62.4, 60.9, 34.1, 25.6, 25.4, 14.3, 13.5, 12.4. HRMS (ESI) calcd for C<sub>19</sub>H<sub>28</sub>NO<sub>2</sub><sup>+</sup> (*M* + *H*)<sup>+</sup> 302.2115, found 302.2113.

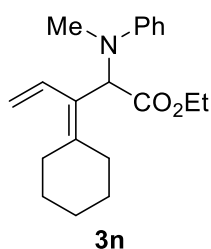

Ethyl 3-cyclohexylidene-2-(methyl(phenyl)amino)pent-4-enoate (**3n**) was obtained (43.3 mg, 69% yield) as a yellow oil (Table 2, entry 14). <sup>1</sup>H NMR (400 MHz, CDCl<sub>3</sub>) δ 7.25-7.21 (m, 2H), 6.76-6.72 (m, 3H), 6.45 (dd, *J* = 17.6, 11.2 Hz, 1H), 5.25 (s, 1H), 5.17-5.11 (m, 2H), 4.20-4.06 (m, 2H), 2.93 (s, 3H), 2.56-2.51 (m, 1H), 2.33-2.26 (m, 1H), 2.19-2.13 (m, 1H), 2.08-2.02 (m, 1H), 1.71-1.36 (m, 6H), 1.20 (t, *J* = 7.2 Hz, 3H). <sup>13</sup>C NMR (100 MHz, CDCl<sub>3</sub>) δ 173.1, 149.4, 146.4, 134.6, 129.3, 124.1, 117.3, 116.8, 112.6, 62.4, 60.9, 33.9, 31.9, 31.8, 28.4, 27.9, 26.6, 14.3. HRMS (ESI) calcd for C<sub>20</sub>H<sub>28</sub>NO<sub>2</sub><sup>+</sup> (*M* + *H*)<sup>+</sup> 314.2115, found 314.2113.

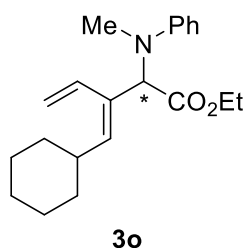

Ethyl (*E*)-3-(cyclohexylmethylene)-2-(methyl(phenyl)amino)pent-4-enoate (**3o**) was obtained (55.7 mg, 85% yield, <1:99 *Z/E*, 70% ee) as a yellow oil (Table 2, entry 15). The ee value was determined by chiral stationary phase HPLC analysis [Daicel Chiralpak OJ, isopropanol/hexane (10:90), 0.8 mL/min, λ = 254 nm, tR (major) = 7.4 min, tR (minor) = 4.7 min]. [α]<sub>D</sub><sup>20</sup> = +20.4 (*c* = 0.80, EtOAc). <sup>1</sup>H NMR (400 MHz, CDCl<sub>3</sub>) δ 7.27-7.21 (m, 2H), 6.78-6.73 (m, 3H), 6.72-6.66 (m, 1H), 5.33 (d, *J* = 9.2 Hz, 1H), 5.21 (s, 1H), 5.09-5.03 (m, 2H), 4.28-4.13 (m, 2H), 2.87 (s, 3H), 2.59-2.49 (m, 1H), 1.76-1.66 (m, 5H), 1.40-1.04 (m, 8H). <sup>13</sup>C NMR (100 MHz, CDCl<sub>3</sub>) δ 172.7, 149.4, 140.7, 131.7, 130.5, 129.4, 117.2, 114.9, 112.4, 63.4, 60.8, 36.9, 33.0, 32.8, 32.6, 26.0, 25.8, 25.7, 14.4. HRMS (ESI) calcd for C<sub>21</sub>H<sub>30</sub>NO<sub>2</sub><sup>+</sup> (*M* + *H*)<sup>+</sup> 328.2271, found 328.2266.

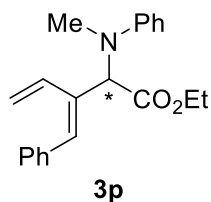

Ethyl (*E*)-3-benzylidene-2-(methyl(phenyl)amino)pent-4-enoate (**3p**) was obtained (47.6 mg, 74% yield, <1:99 *Z/E*, 81% ee) as a yellow oil (Table 2, entry 16). The ee value was determined by chiral stationary phase HPLC analysis [Daicel Chiralpak OJ, isopropanol/hexane (10:90), 0.8 mL/min,  $\lambda = 254$  nm, tR (major) = 11.1 min, tR (minor) = 7.4 min].  $[\alpha]_D^{20} = +30.3$  ( $c = 0.60$ , EtOAc).  $^1\text{H NMR}$  (400 MHz,  $\text{CDCl}_3$ )  $\delta$  7.39-7.25 (m, 7H), 6.84-6.76 (m, 4H), 6.59 (s, 1H), 5.40 (s, 1H), 5.25 (d,  $J = 17.6$  Hz, 1H), 5.15 (d,  $J = 11.2$  Hz, 1H), 4.32-4.20 (m, 2H), 2.98 (s, 3H), 1.29 (t,  $J = 7.2$  Hz, 3H).  $^{13}\text{C NMR}$  (100 MHz,  $\text{CDCl}_3$ )  $\delta$  172.3, 149.3, 136.2, 133.9, 132.7, 132.6, 129.7, 129.5, 128.4, 127.8, 117.7, 116.7, 112.8, 64.2, 61.2, 33.4, 14.4. HRMS (ESI) calcd for  $\text{C}_{21}\text{H}_{24}\text{NO}_2^+$  ( $\text{M} + \text{H}$ ) $^+$  322.1802, found 322.1797.

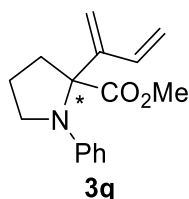

Methyl 2-(buta-1,3-dien-2-yl)-1-phenylpyrrolidine-2-carboxylate (**3q**) was obtained (20.1 mg, 39% yield, 90% ee) as a yellow oil (Table 2, entry 17). The ee value was determined by chiral stationary phase HPLC analysis [Daicel Chiralpak OD, isopropanol/hexane (2:98), 1.0 mL/min,  $\lambda = 254$  nm, tR (major) = 6.1 min, tR (minor) = 5.3 min].  $[\alpha]_D^{20} = -29.4$  ( $c = 1.70$ , EtOAc).  $^1\text{H NMR}$  (400 MHz,  $\text{CDCl}_3$ )  $\delta$  7.17-7.12 (m, 2H), 6.70-6.66 (m, 1H), 6.64-6.61 (m, 2H), 6.39 (dd,  $J = 17.6, 10.8$  Hz, 1H), 5.48 (s, 1H), 5.47-5.42 (m, 1H), 5.10-5.07 (m, 2H), 3.57-3.52 (m, 5H), 2.54-2.47 (m, 1H), 2.32-2.26 (m, 1H), 2.04-1.88 (m, 2H).  $^{13}\text{C NMR}$  (100 MHz,  $\text{CDCl}_3$ )  $\delta$  174.3, 146.1, 145.1, 136.0, 128.7, 117.0, 115.1, 114.7, 113.5, 74.1, 52.3, 50.2, 39.5, 22.8. HRMS (ESI) calcd for  $\text{C}_{16}\text{H}_{19}\text{NO}_2\text{Na}^+$  ( $\text{M} + \text{Na}$ ) $^+$  280.1308, found 280.1307.

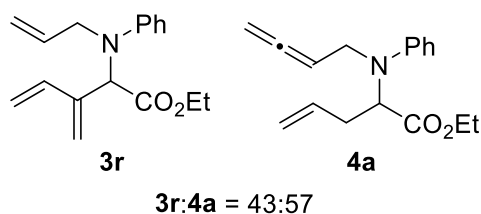

A 43:57 mixture of ethyl 2-(allyl(phenyl)amino)-3-methylenepent-4-enoate (**3r**) and ethyl 2-(buta-2,3-dien-1-yl(phenyl)amino)pent-4-enoate (**4a**) was obtained (41.2 mg, 76% yield) as a yellow oil (Scheme 3a).  $^1\text{H NMR}$  (400 MHz,  $\text{CDCl}_3$ ) for compound **3r**:  $\delta$  7.25-7.20 (m, 2H), 6.84-6.75 (m, 3H), 6.40 (dd,  $J = 17.6, 11.2$  Hz, 1H), 5.87-5.76 (m, 1H), 5.43 (s, 1H), 4.23-4.12 (m, 2H), 4.10-3.92 (m, 2H), 1.26 (t,  $J = 6.8$  Hz, 3H).  $^1\text{H NMR}$  for compound **4a**:  $\delta$  7.25-7.20 (m, 2H), 6.84-6.75 (m, 3H), 5.87-5.76 (m, 1H), 5.25-5.05 (m, 3H), 4.77-4.74 (m, 2H), 4.38 (t,  $J = 7.6$  Hz, 1H), 4.23-4.12 (m, 2H), 4.10-3.92 (m, 2H), 2.79-2.72 (m, 1H), 2.68-2.60 (m, 1H), 1.23 (t,  $J = 7.2$  Hz, 3H).  $^{13}\text{C NMR}$  (100 MHz,  $\text{CDCl}_3$ )  $\delta$  208.9, 172.5, 172.0, 148.8, 148.4, 141.5, 137.1, 136.7, 134.4, 129.3, 129.2, 119.9, 118.3,

118.0, 117.9, 115.7, 115.5, 114.6, 113.6, 88.8, 76.4, 62.6, 61.8, 61.2, 61.1, 50.1, 46.7, 34.7, 14.4, 14.3. HRMS (ESI) calcd for  $C_{17}H_{22}NO_2^+$  ( $M + H$ )<sup>+</sup> 272.1645, found 272.1649.

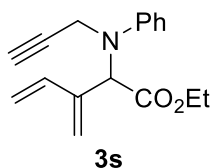

Ethyl 3-methylene-2-(phenyl(prop-2-yn-1-yl)amino)pent-4-enoate (**3s**) was obtained (28.6 mg, 53% yield) as a yellow oil (Scheme 3b). <sup>1</sup>H NMR (400 MHz, CDCl<sub>3</sub>)  $\delta$  7.30-7.26 (m, 2H), 6.94 (d,  $J = 8.4$  Hz, 2H), 6.84 (t,  $J = 7.2$  Hz, 1H), 6.43 (dd,  $J = 17.6, 11.2$  Hz, 1H), 5.48 (s, 1H), 5.28 (d,  $J = 17.6$  Hz, 1H), 5.23-5.20 (m, 2H), 5.13 (d,  $J = 11.2$  Hz, 1H), 4.25-4.17 (m, 3H), 4.07-4.01 (m, 1H), 2.16 (t,  $J = 2.4$  Hz, 1H), 1.25 (t,  $J = 7.2$  Hz, 3H). <sup>13</sup>C NMR (100 MHz, CDCl<sub>3</sub>)  $\delta$  171.7, 147.7, 141.3, 136.5, 129.4, 120.0, 119.1, 116.0, 114.2, 81.1, 71.7, 62.6, 61.3, 37.1, 14.3. HRMS (ESI) calcd for  $C_{17}H_{20}NO_2^+$  ( $M + H$ )<sup>+</sup> 270.1489, found 270.1492.

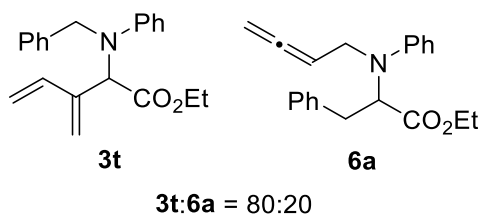

A 80:20 mixture of ethyl 2-(benzyl(phenyl)amino)-3-methylenepent-4-enoate (**3t**) and ethyl *N*-(buta-2,3-dien-1-yl)-*N*-phenylphenylalaninate (**6a**) was obtained (48.2 mg, 75% yield) as a yellow oil (Scheme 3c). <sup>1</sup>H NMR (400 MHz, CDCl<sub>3</sub>) for compound **3t**:  $\delta$  7.28-7.14 (m, 7H), 6.78-6.74 (m, 3H), 6.37 (dd,  $J = 17.6, 11.2$  Hz, 1H), 5.43 (s, 1H), 5.39 (s, 1H), 5.32 (d,  $J = 17.6$  Hz, 1H), 5.20 (s, 1H), 5.14 (d,  $J = 11.2$  Hz, 1H), 4.76-4.58 (m, 2H), 4.19-4.06 (m, 2H), 1.21 (t,  $J = 7.2$  Hz, 3H). <sup>1</sup>H NMR (400 MHz, CDCl<sub>3</sub>) for compound **6a**: 7.28-7.14 (m, 7H), 6.78-6.74 (m, 3H),  $\delta$  5.08-5.05 (m, 1H), 4.73-4.70 (m, 2H), 4.53 (t,  $J = 7.6$  Hz, 1H), 4.19-4.06 (m, 2H) 4.04-4.00 (m, 2H), 3.33 (dd,  $J = 14.0, 7.2$  Hz, 1H), 3.17 (dd,  $J = 14.0, 7.2$  Hz, 1H), 1.13 (t,  $J = 7.2$  Hz, 3H). <sup>13</sup>C NMR (100 MHz, CDCl<sub>3</sub>)  $\delta$  208.8, 172.5, 171.9, 149.0, 148.2, 141.1, 139.8, 138.0, 137.2, 129.3, 129.2, 129.1, 128.6, 128.2, 126.9, 126.7, 126.4, 120.2, 118.4, 118.1, 115.4, 114.5, 114.2, 88.7, 76.3, 63.9, 62.8, 61.2, 61.0, 51.8, 47.4, 36.3, 14.2. HRMS (ESI) calcd for  $C_{21}H_{24}NO_2^+$  ( $M + H$ )<sup>+</sup> 322.1802, found 322.1797.

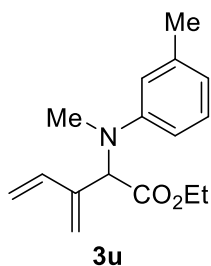

Ethyl 2-(methyl(*m*-tolyl)amino)-3-methylenepent-4-enoate (**3u**) was obtained (47.7 mg, 92% yield) as a yellow oil (Table 3, entry 1). <sup>1</sup>H NMR (400 MHz, CDCl<sub>3</sub>)  $\delta$  7.16-7.12 (m, 1H), 6.61-6.59 (m, 3H), 6.38 (dd,  $J = 17.6, 11.2$  Hz, 1H), 5.43 (s, 1H), 5.21-5.16 (m, 3H), 5.07 (d,  $J = 11.2$  Hz, 1H),

4.29-4.14 (m, 2H), 2.90 (s, 3H), 2.32 (s, 3H), 1.26 (t,  $J = 7.2$  Hz, 3H).  $^{13}\text{C}$  NMR (100 MHz,  $\text{CDCl}_3$ )  $\delta$  172.2, 149.4, 141.7, 139.1, 136.8, 129.3, 119.5, 118.5, 115.6, 113.4, 109.7, 62.9, 61.0, 33.2, 22.1, 14.4. HRMS (ESI) calcd for  $\text{C}_{16}\text{H}_{22}\text{NO}_2^+$  ( $\text{M} + \text{H}$ ) $^+$  260.1645, found 260.1646.

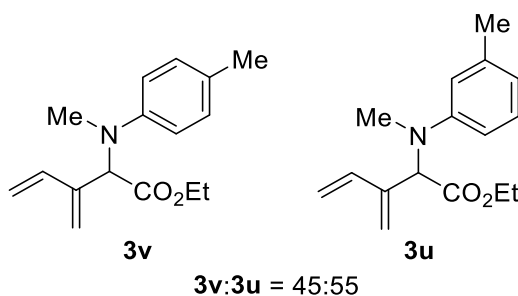

A 45:55 mixture of ethyl 2-(methyl(*p*-tolyl)amino)-3-methylenepent-4-enoate (**3v**) and ethyl 2-(methyl(*m*-tolyl)amino)-3-methylenepent-4-enoate (**3u**) was obtained (31.1 mg, 60% yield) as a yellow oil (Table 3, entry 2).  $^1\text{H}$  NMR (400 MHz,  $\text{CDCl}_3$ ) for compound **3v**:  $\delta$  7.06 (d,  $J = 8.4$  Hz, 2H), 6.71 (d,  $J = 8.4$  Hz, 2H), 6.38 (dd,  $J = 17.6, 11.2$  Hz, 1H), 5.43 (s, 1H), 5.15-5.13 (m, 3H), 5.07 (d,  $J = 11.2$  Hz, 1H), 4.29-4.14 (m, 2H), 2.88 (s, 3H), 2.26 (s, 3H), 1.26 (t,  $J = 7.2$  Hz, 3H).  $^{13}\text{C}$  NMR (100 MHz,  $\text{CDCl}_3$ )  $\delta$  172.2, 149.4, 147.2, 141.7, 139.1, 136.9, 136.8, 130.0, 129.3, 126.8, 119.4, 118.5, 115.6, 115.5, 113.4, 112.9, 109.8, 63.2, 63.0, 61.0, 60.9, 33.4, 33.2, 22.1, 20.4, 14.4. HRMS (ESI) calcd for  $\text{C}_{16}\text{H}_{22}\text{NO}_2^+$  ( $\text{M} + \text{H}$ ) $^+$  260.1645, found 260.1641.

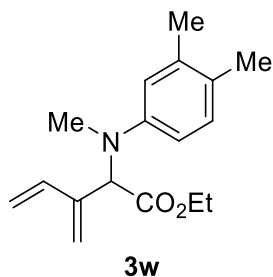

Ethyl 2-((3,4-dimethylphenyl)(methyl)amino)-3-methylenepent-4-enoate (**3w**) was obtained (39.4 mg, 72% yield) as a yellow oil (Table 3, entry 3).  $^1\text{H}$  NMR (400 MHz,  $\text{CDCl}_3$ )  $\delta$  7.00 (d,  $J = 8.4$  Hz, 1H), 6.60 (d,  $J = 2.8$  Hz, 1H), 6.55 (dd,  $J = 8.4, 2.8$  Hz, 1H), 6.38 (dd,  $J = 17.6, 11.2$  Hz, 1H), 5.42 (s, 1H), 5.20 (d,  $J = 17.6$  Hz, 1H), 5.19-5.14 (m, 2H), 5.07 (d,  $J = 11.2$  Hz, 1H), 4.28-4.13 (m, 2H), 2.88 (s, 3H), 2.23 (s, 3H), 2.17 (s, 3H), 1.26 (t,  $J = 7.2$  Hz, 3H).  $^{13}\text{C}$  NMR (100 MHz,  $\text{CDCl}_3$ )  $\delta$  172.3, 147.6, 141.8, 137.4, 136.9, 130.5, 125.5, 119.3, 115.5, 114.4, 110.2, 63.1, 61.0, 33.3, 20.6, 18.7, 14.4. HRMS (ESI) calcd for  $\text{C}_{17}\text{H}_{24}\text{NO}_2^+$  ( $\text{M} + \text{H}$ ) $^+$  274.1802, found 274.1799.

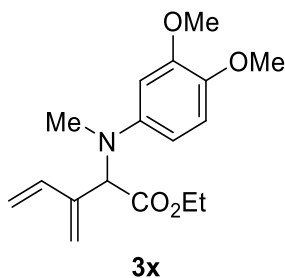

Ethyl 2-((3,4-dimethoxyphenyl)(methyl)amino)-3-methylenepent-4-enoate (**3x**) was obtained

(46.4 mg, 76% yield) as a yellow oil (Table 3, entry 4).  $^1\text{H}$  NMR (400 MHz,  $\text{CDCl}_3$ )  $\delta$  6.80 (d,  $J = 8.8$  Hz, 1H), 6.44-6.36 (m, 2H), 6.31 (dd,  $J = 8.8, 2.8$  Hz, 1H), 5.43 (s, 1H), 5.23 (d,  $J = 17.6$  Hz, 1H), 5.18-5.09 (m, 3H), 4.28-4.15 (m, 2H), 3.87 (s, 3H), 3.82 (s, 3H), 2.89 (s, 3H), 1.26 (t,  $J = 7.2$  Hz, 3H).  $^{13}\text{C}$  NMR (100 MHz,  $\text{CDCl}_3$ )  $\delta$  172.2, 149.8, 144.5, 141.7, 141.5, 136.8, 119.5, 115.6, 113.0, 104.5, 99.0, 63.9, 61.0, 56.6, 55.9, 33.9, 14.4. HRMS (ESI) calcd for  $\text{C}_{17}\text{H}_{24}\text{NO}_4^+$  ( $\text{M} + \text{H}$ ) $^+$  306.1700, found 306.1702.

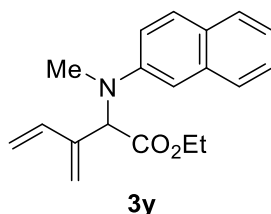

Ethyl 2-(methyl(naphthalen-2-yl)amino)-3-methylenepent-4-enoate (**3y**) was obtained (41.4 mg, 70% yield) as a yellow oil (Table 3, entry 5).  $^1\text{H}$  NMR (400 MHz,  $\text{CDCl}_3$ )  $\delta$  7.74-7.64 (m, 3H), 7.39-7.35 (m, 1H), 7.24-7.16 (m, 2H), 7.00 (d,  $J = 2.4$  Hz, 1H), 6.41 (dd,  $J = 17.6, 11.2$  Hz, 1H), 5.46 (s, 1H), 5.35 (s, 1H), 5.18 (d,  $J = 17.6$  Hz, 2H), 5.07 (d,  $J = 11.2$  Hz, 1H), 4.30-4.16 (m, 2H), 3.01 (s, 3H), 1.27 (t,  $J = 7.2$  Hz, 3H).  $^{13}\text{C}$  NMR (100 MHz,  $\text{CDCl}_3$ )  $\delta$  172.1, 147.2, 141.5, 136.8, 135.0, 129.2, 127.5, 127.3, 126.5, 122.5, 119.7, 115.8, 115.6, 106.9, 63.2, 61.2, 33.5, 14.4. HRMS (ESI) calcd for  $\text{C}_{19}\text{H}_{22}\text{NO}_2^+$  ( $\text{M} + \text{H}$ ) $^+$  296.1645, found 296.1643.

## References

- (1) R. K. Dieter, N. Chen, H. Yu, L. E. Nice and V. K. Gore, *J. Org. Chem.*, 2005, **70**, 2109–2119.
- (2) C. P. Grugel and B. Breit, *Org. Lett.*, 2019, **21**, 9672–9676.
- (3) Q. Liu, X. Tang, Y. Cai and S. Ma, *Org. Lett.*, 2017, **19**, 5174–5177.
- (4) X. Huang, T. Cao, Y. Han, X. Jiang, W. Lin, J. Zhang and S. Ma, *Chem. Commun.*, 2015, **51**, 6956–6959.



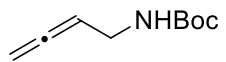

**S2a**

<sup>1</sup>H NMR (500 MHz, CDCl<sub>3</sub>)

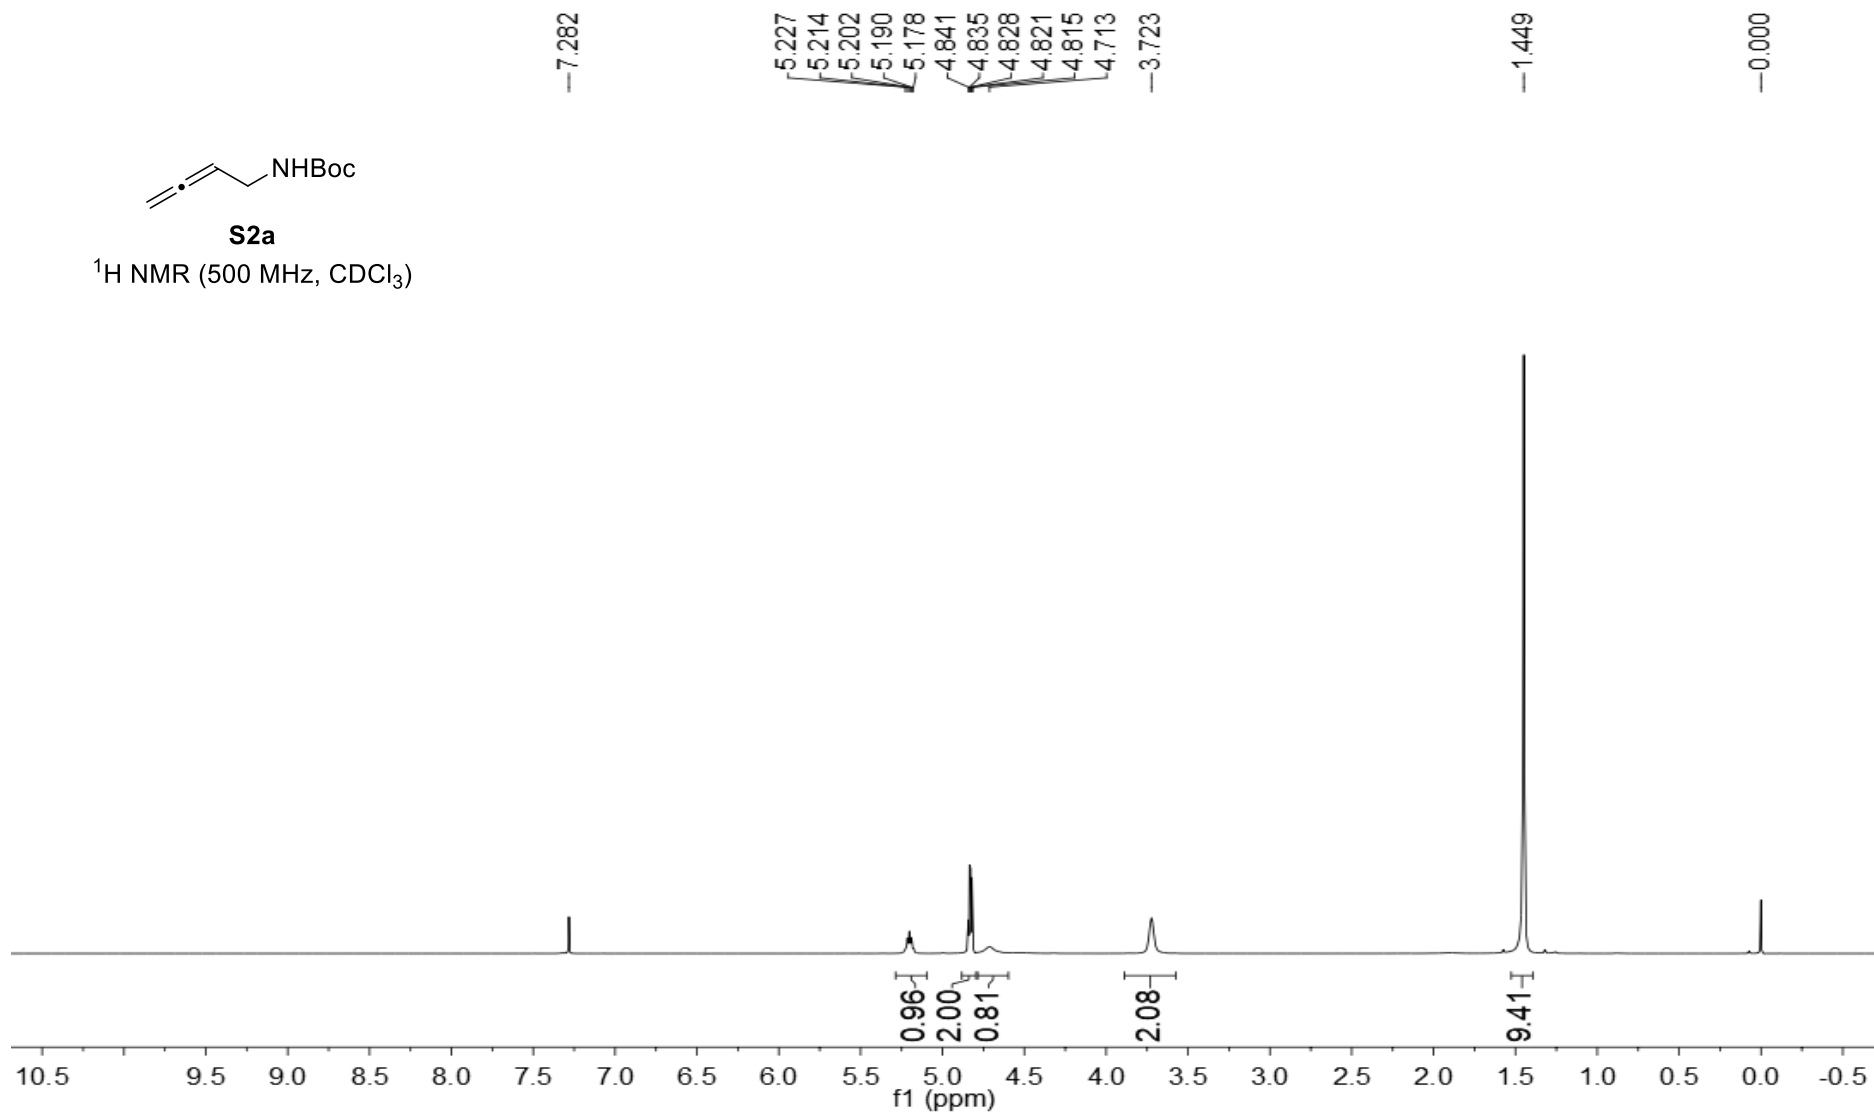

-208.006

-155.826

-88.599  
-79.494  
-77.528  
-77.414  
-77.160  
-76.905

-38.916

-28.484

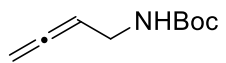

**S2a**

<sup>13</sup>C NMR (125 MHz, CDCl<sub>3</sub>)

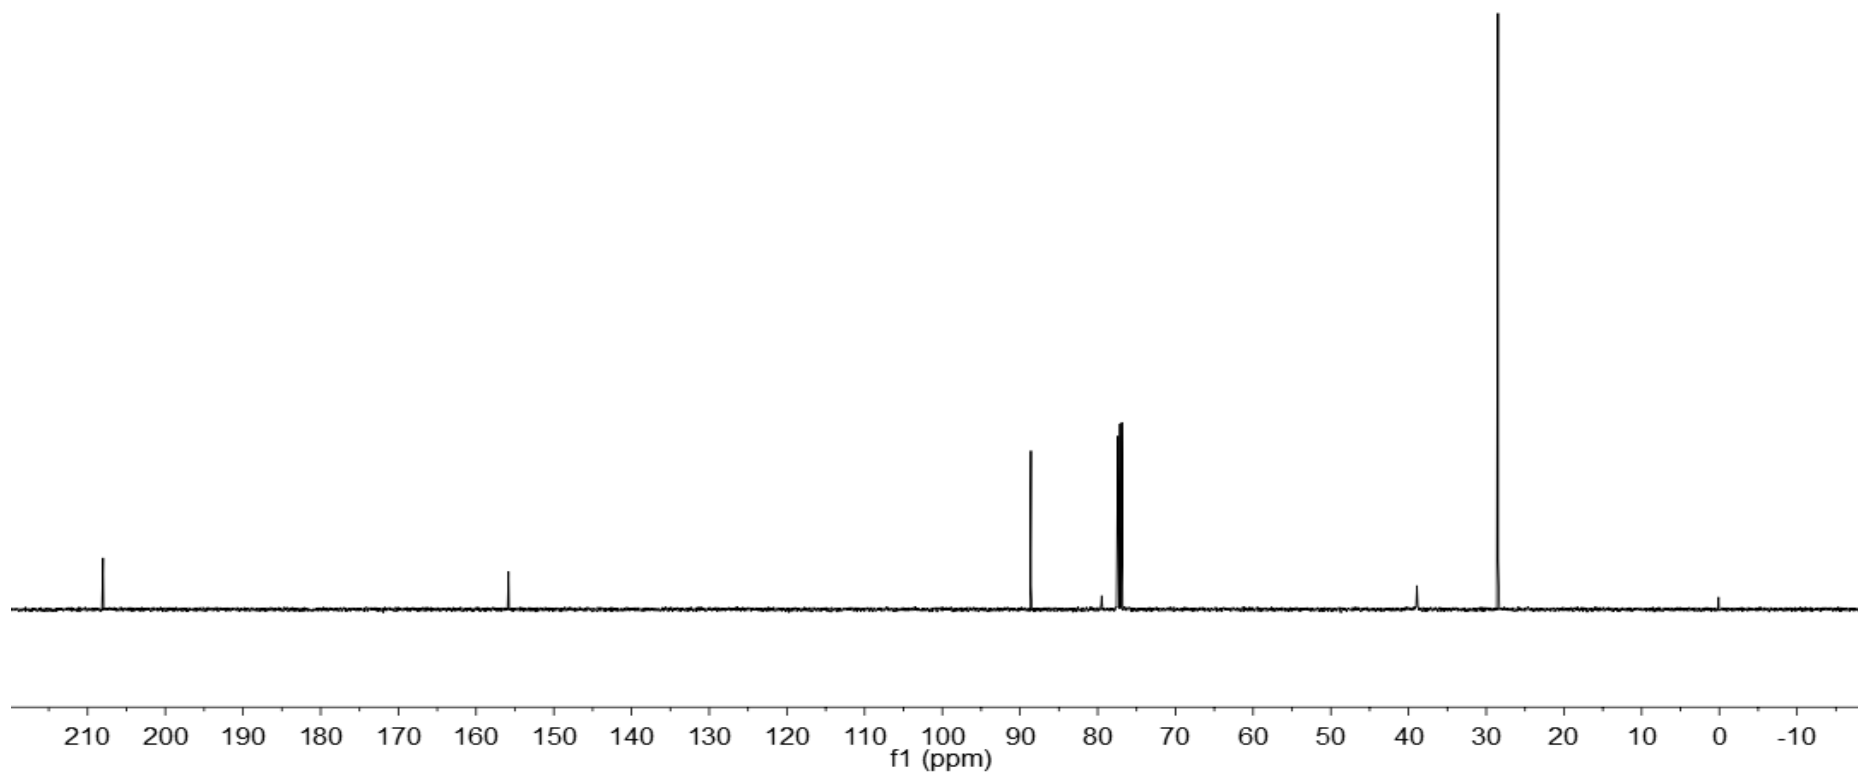

7.868  
7.865  
7.857  
7.851  
7.846  
7.840  
7.832  
7.830  
7.729  
7.727  
7.720  
7.714  
7.709  
7.703  
7.695  
7.692  
7.274

5.287  
5.281  
5.275  
5.270  
5.264  
5.258  
5.254  
5.248  
5.242  
4.278  
4.268

1.890  
1.881  
1.875  
1.865  
1.859  
1.850  
1.844  
1.837  
1.829  
1.822  
1.814  
1.808  
1.798  
1.792  
1.886  
0.882  
0.867

-0.000

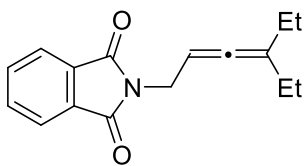

**S11a**

<sup>1</sup>H NMR (500 MHz, CDCl<sub>3</sub>)

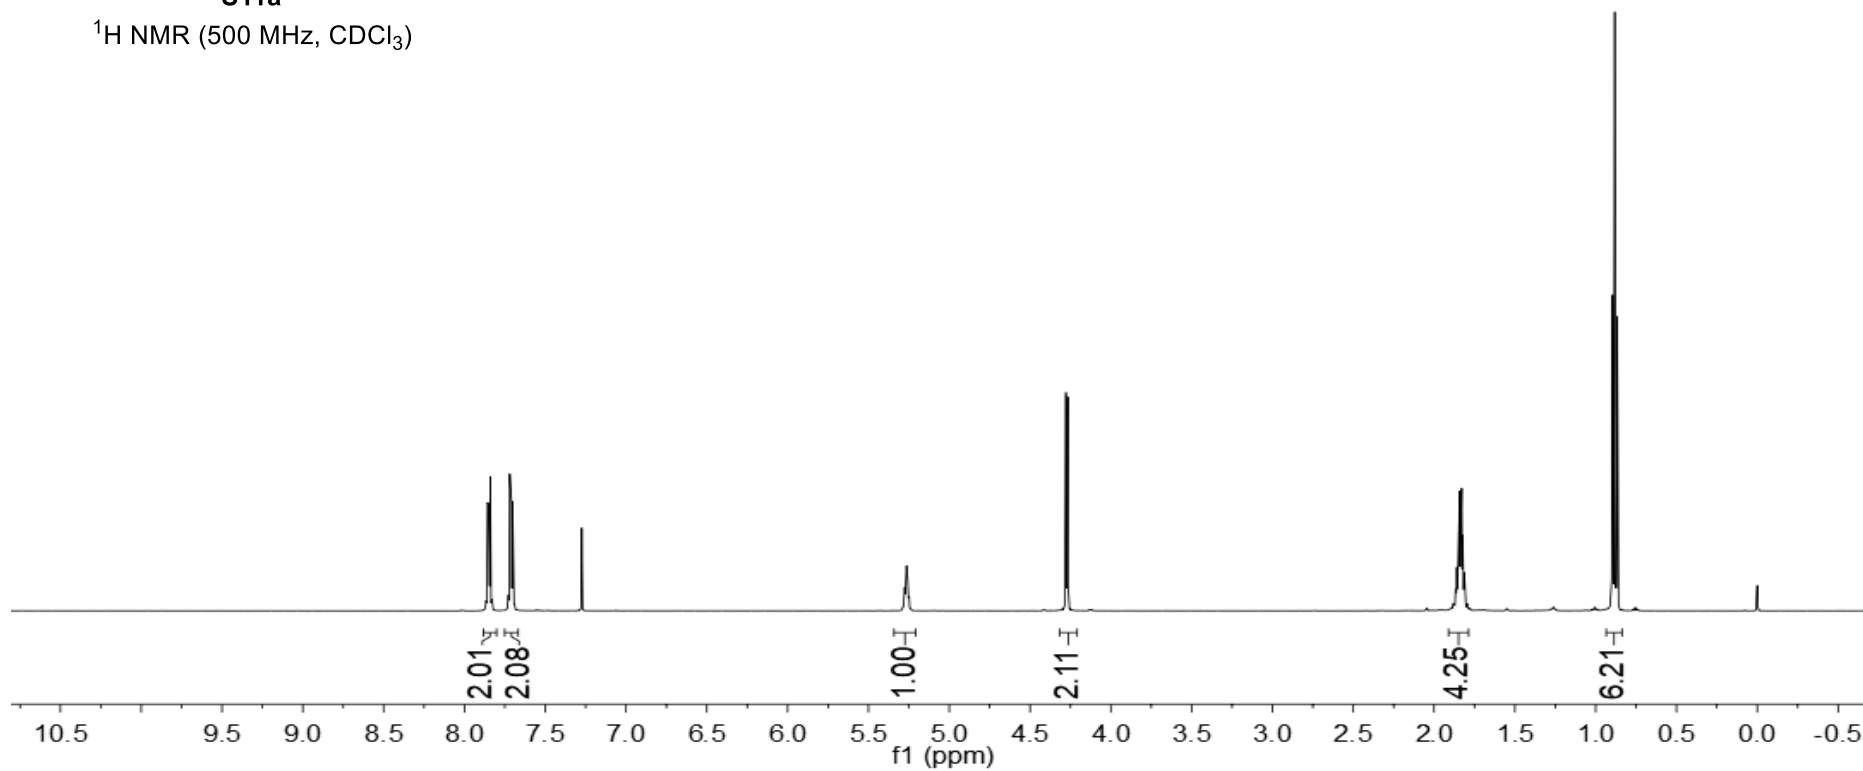

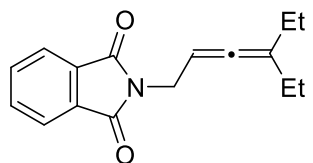

**S11a**

<sup>13</sup>C NMR (125 MHz, CDCl<sub>3</sub>)

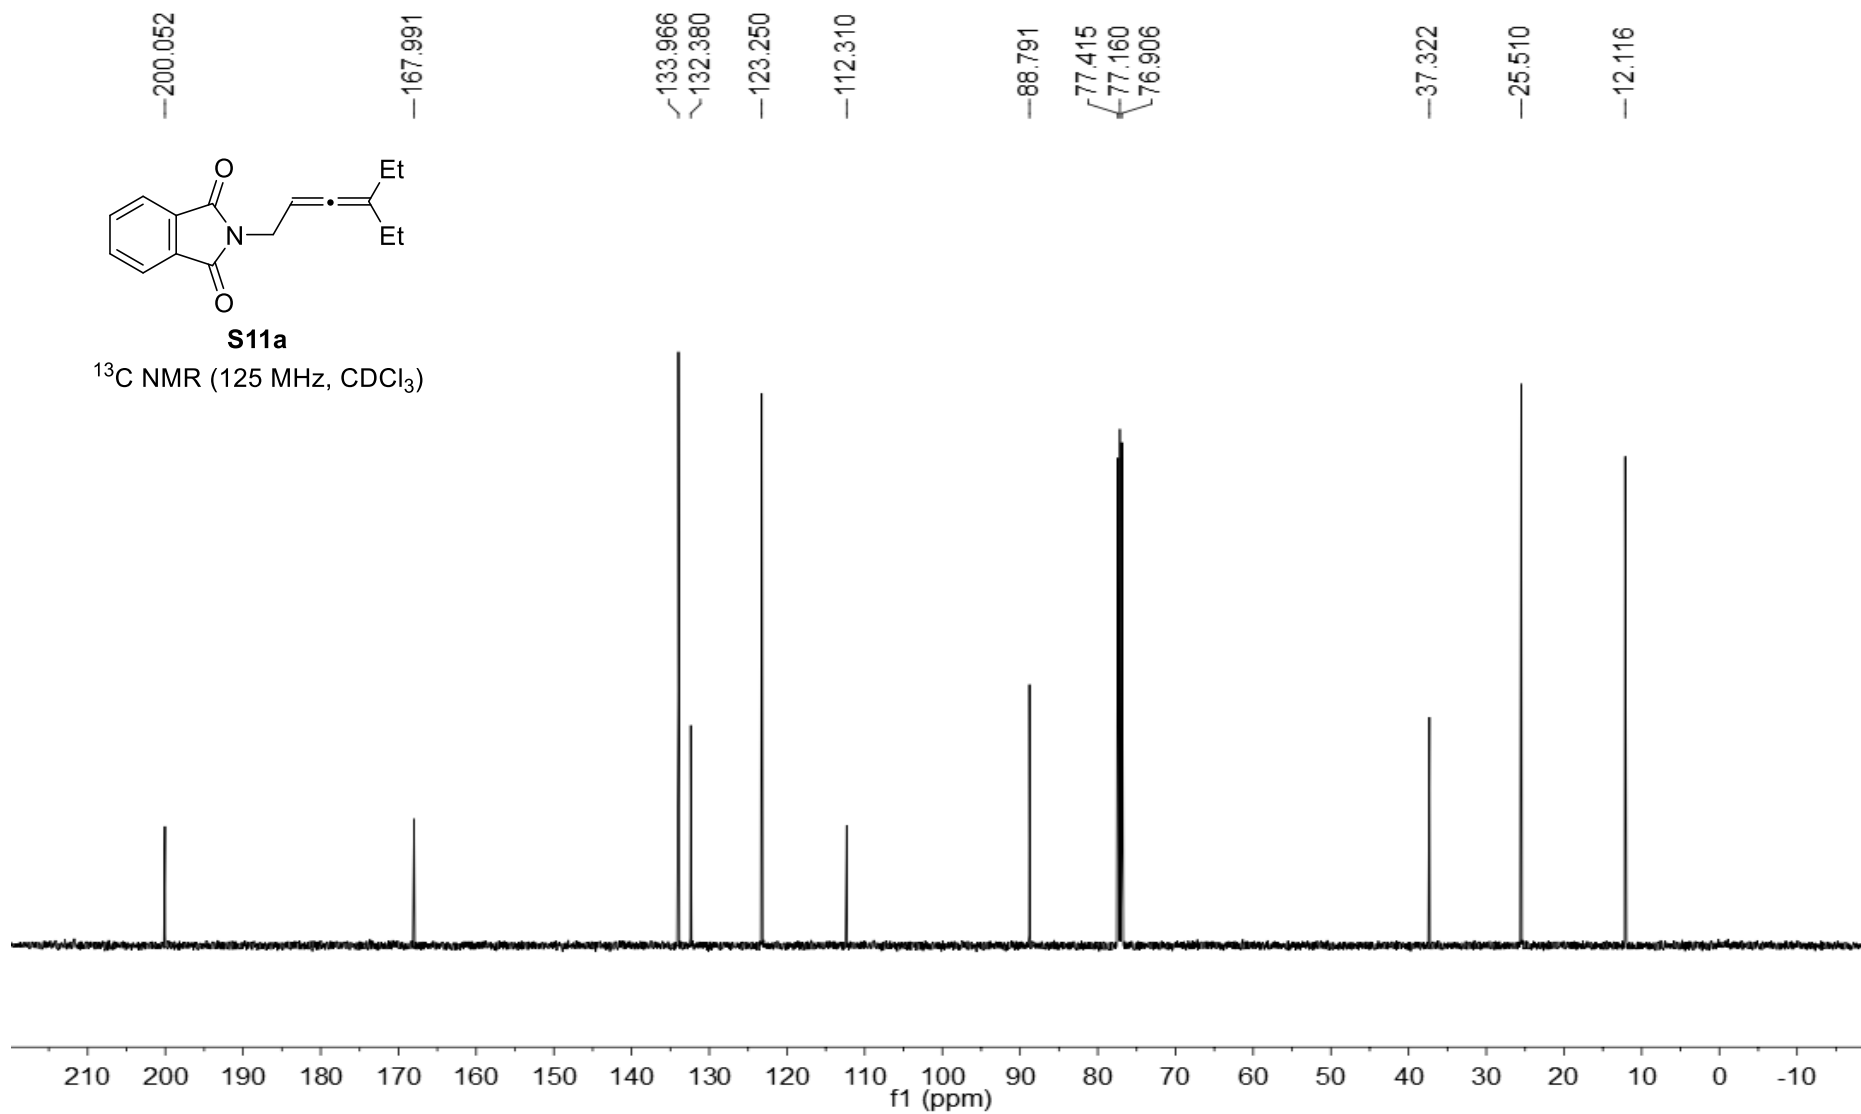

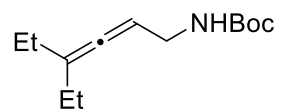

**S2b**

<sup>1</sup>H NMR (500 MHz, CDCl<sub>3</sub>)

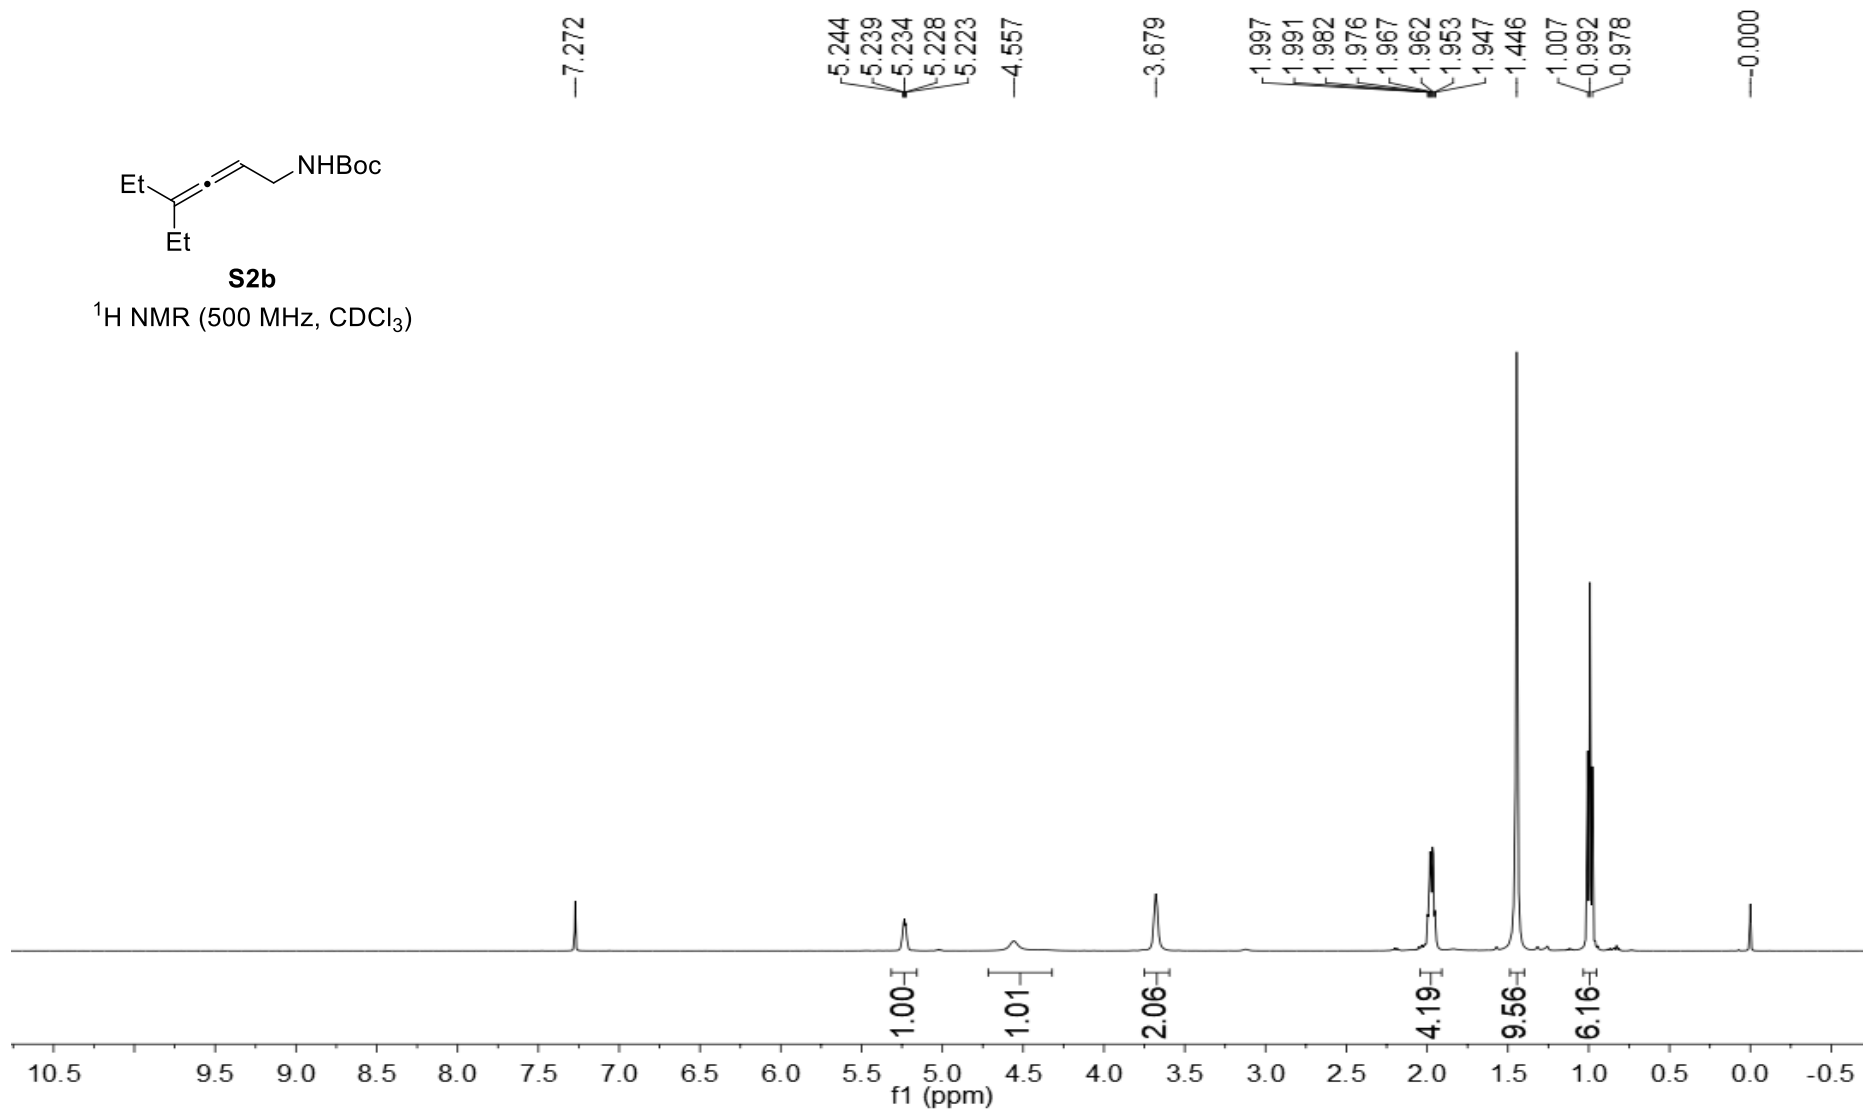

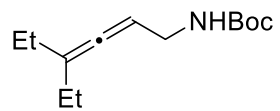

**S2b**

$^{13}\text{C}$  NMR (125 MHz,  $\text{CDCl}_3$ )

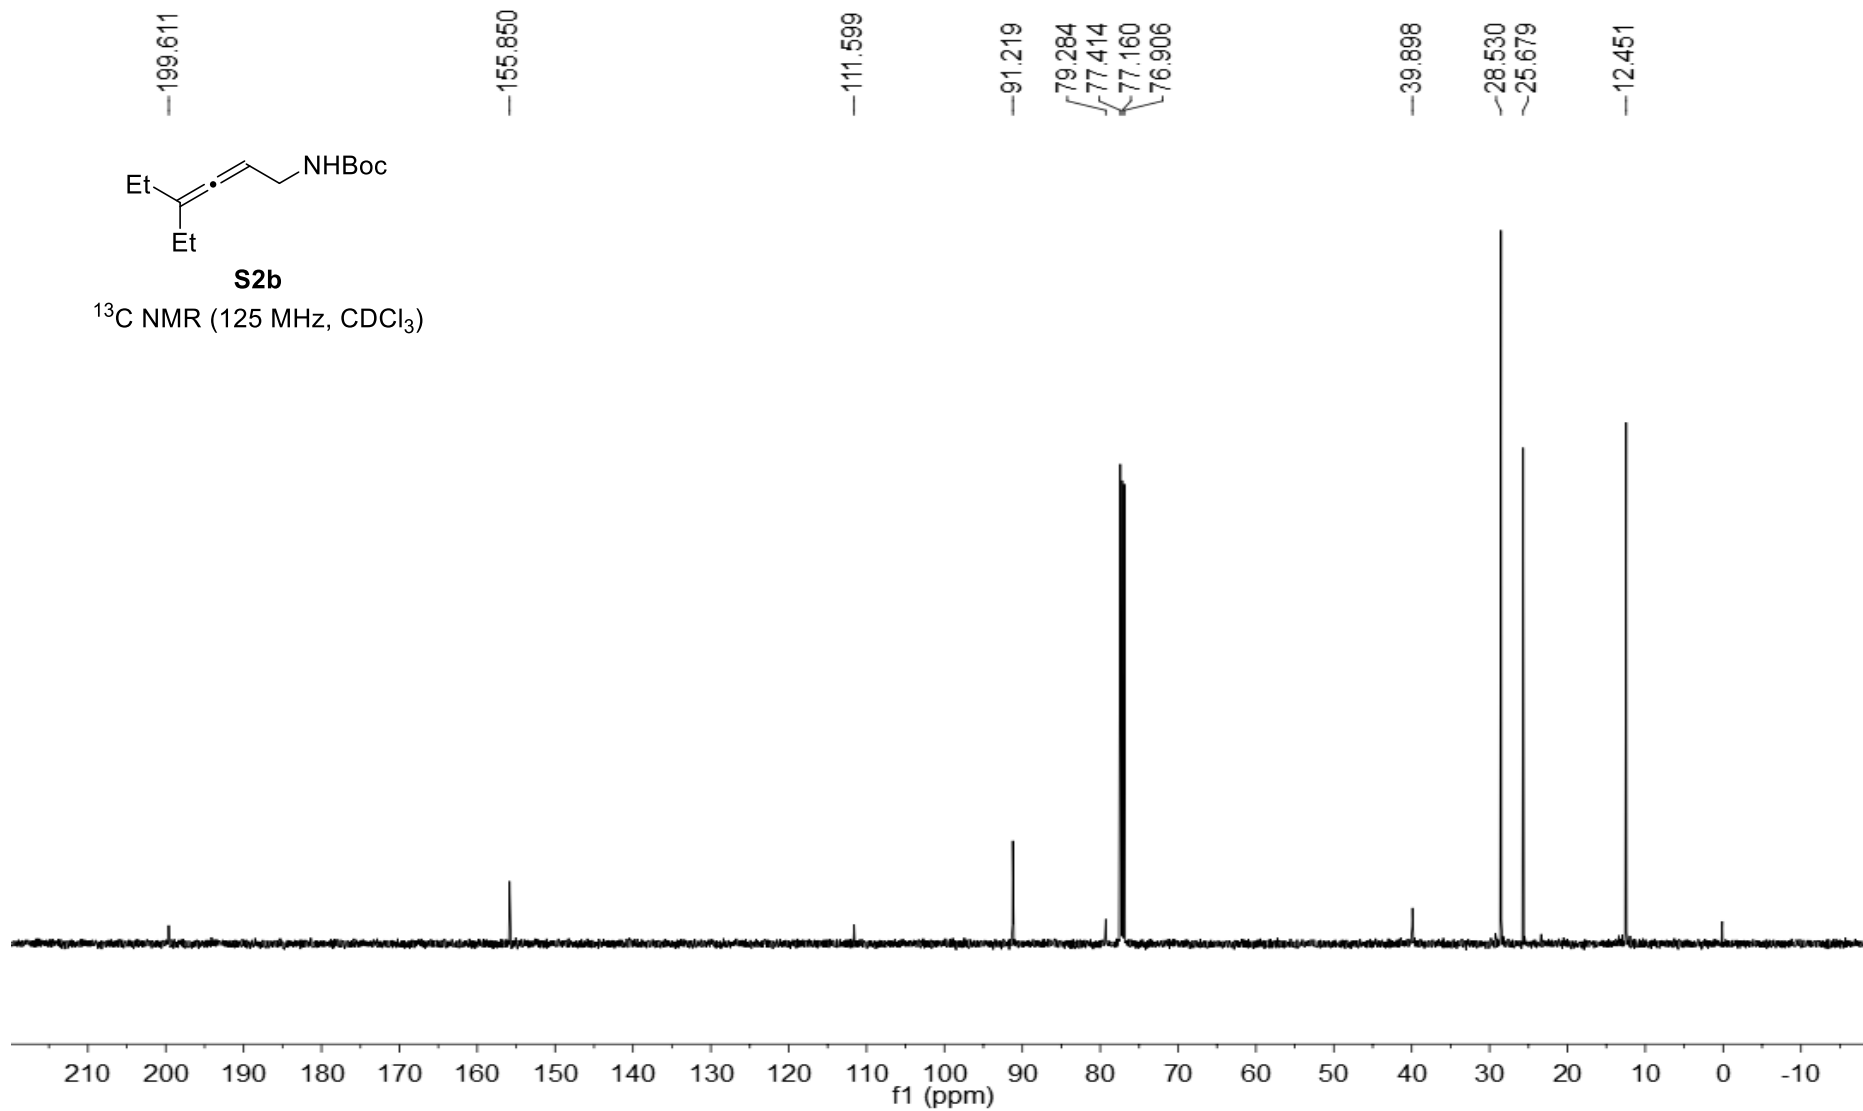

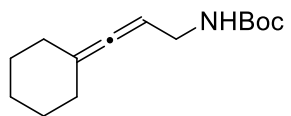

**S2c**

<sup>1</sup>H NMR (500 MHz, CDCl<sub>3</sub>)

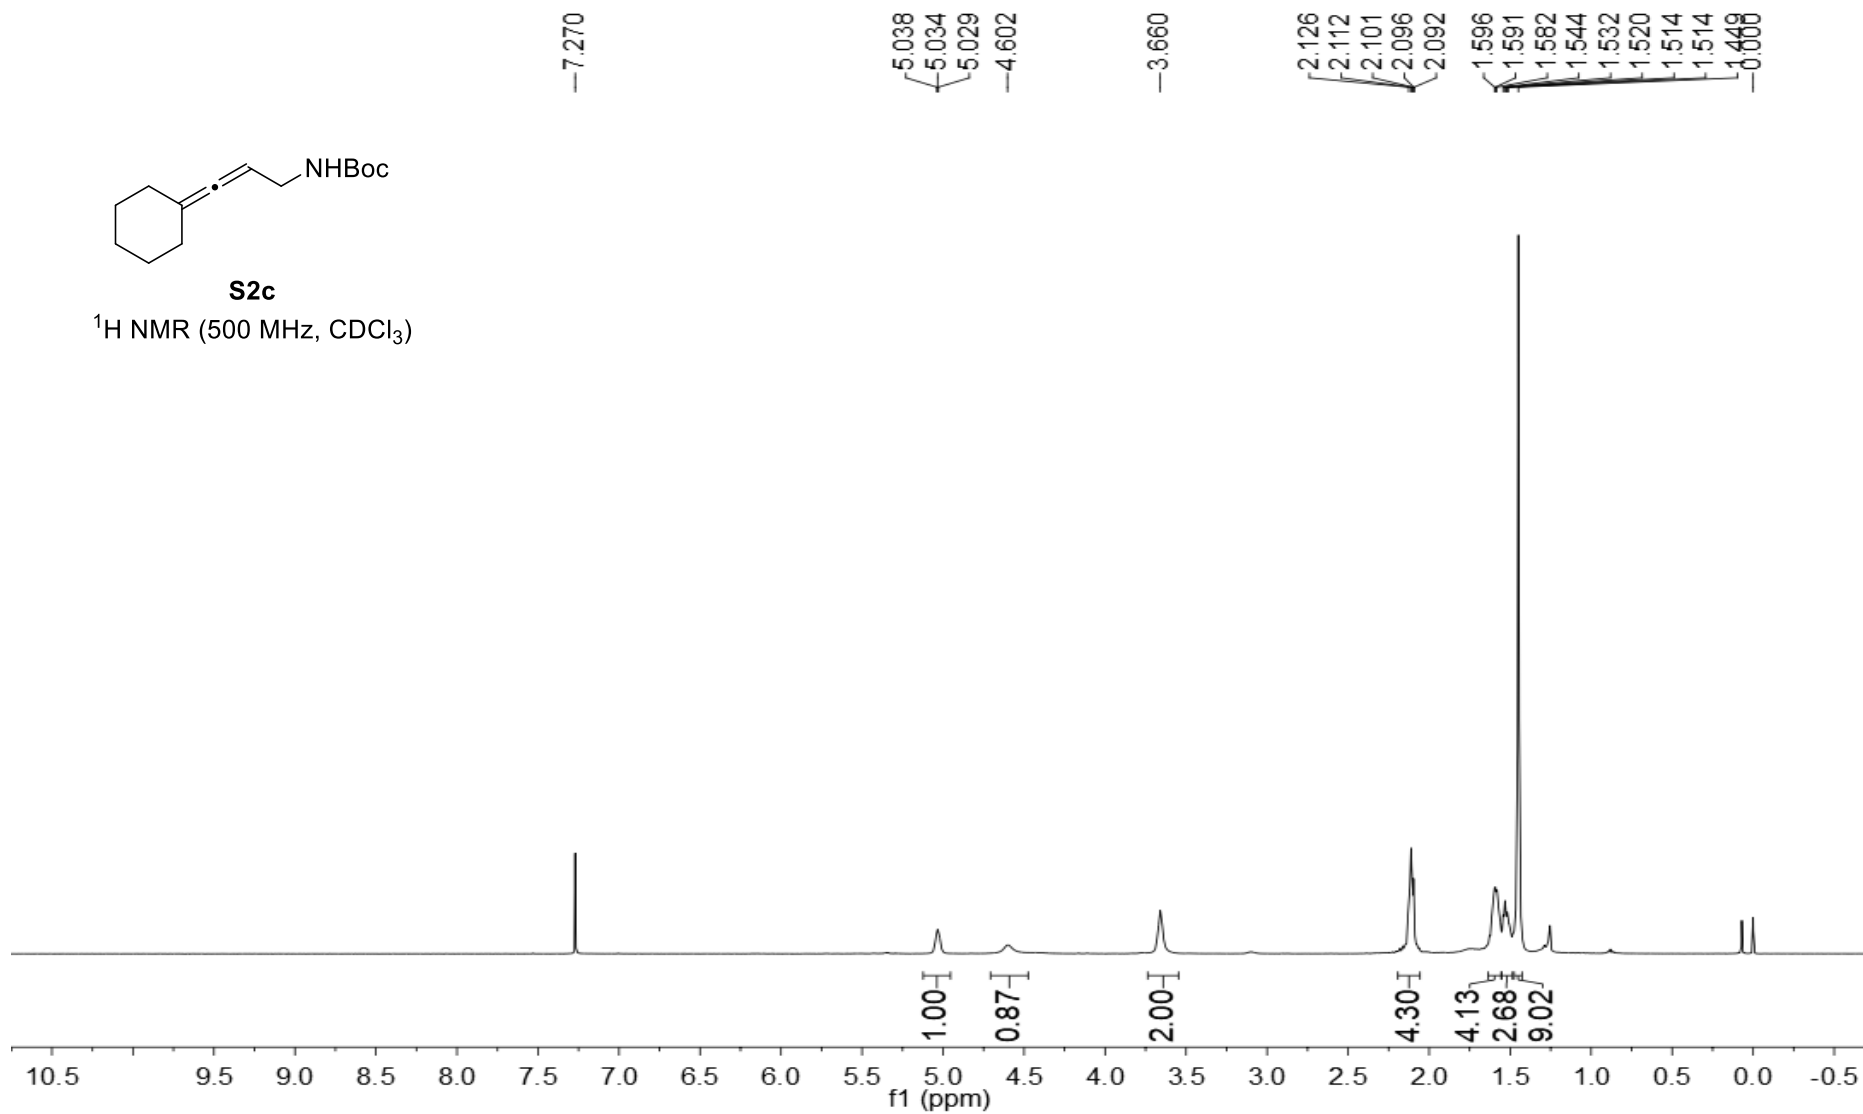

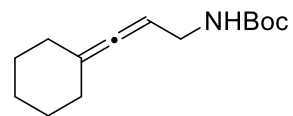

**S2c**

<sup>13</sup>C NMR (125 MHz, CDCl<sub>3</sub>)

197.779

155.877

105.852

86.961

79.328

77.414

77.160

76.905

39.886

31.654

28.554

27.594

26.182

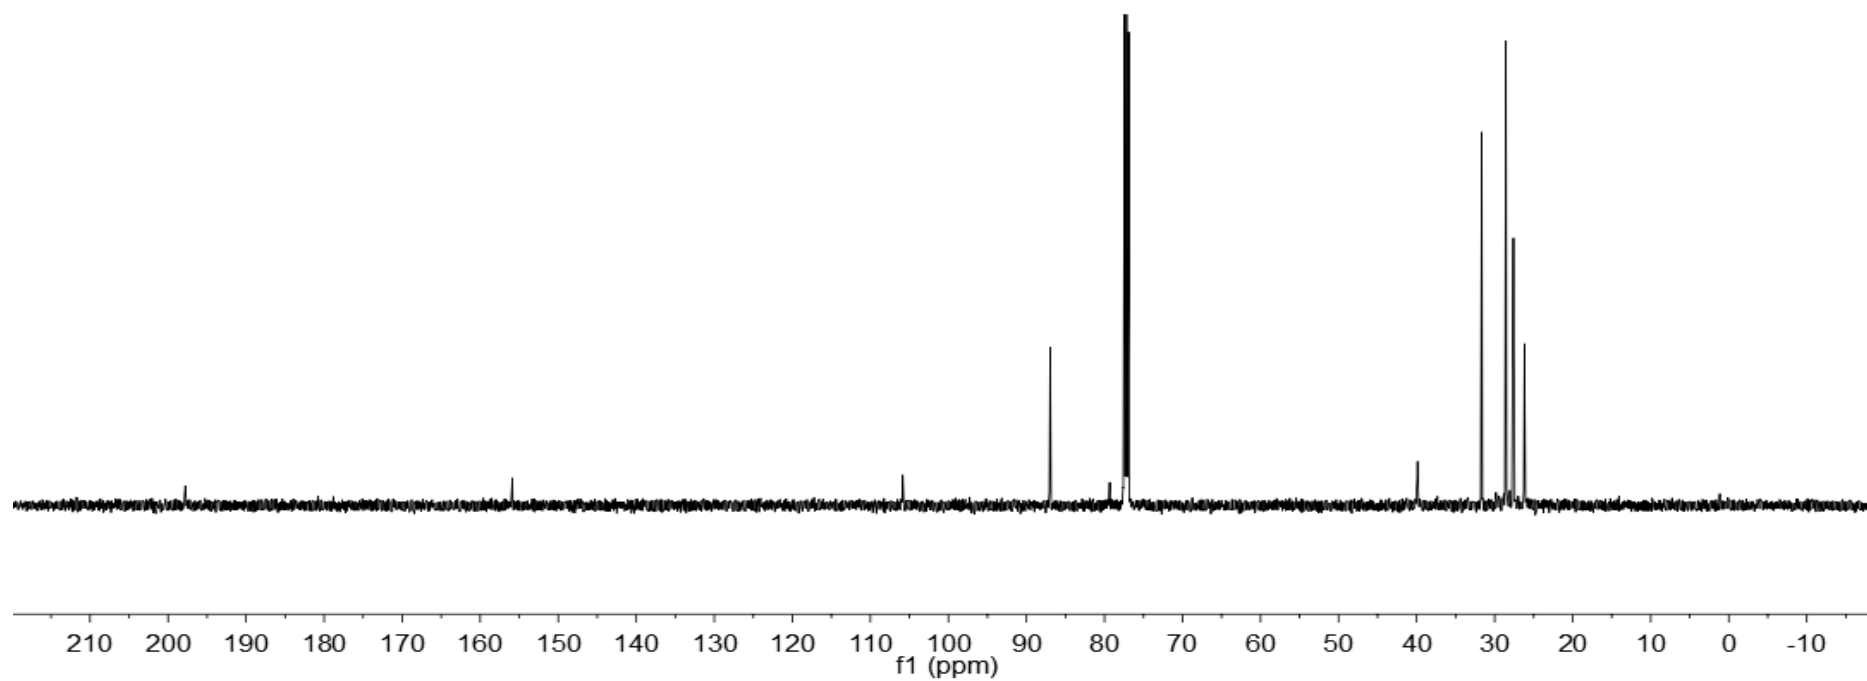



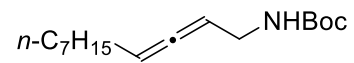

**S2d**

<sup>1</sup>H NMR (500 MHz, CDCl<sub>3</sub>)

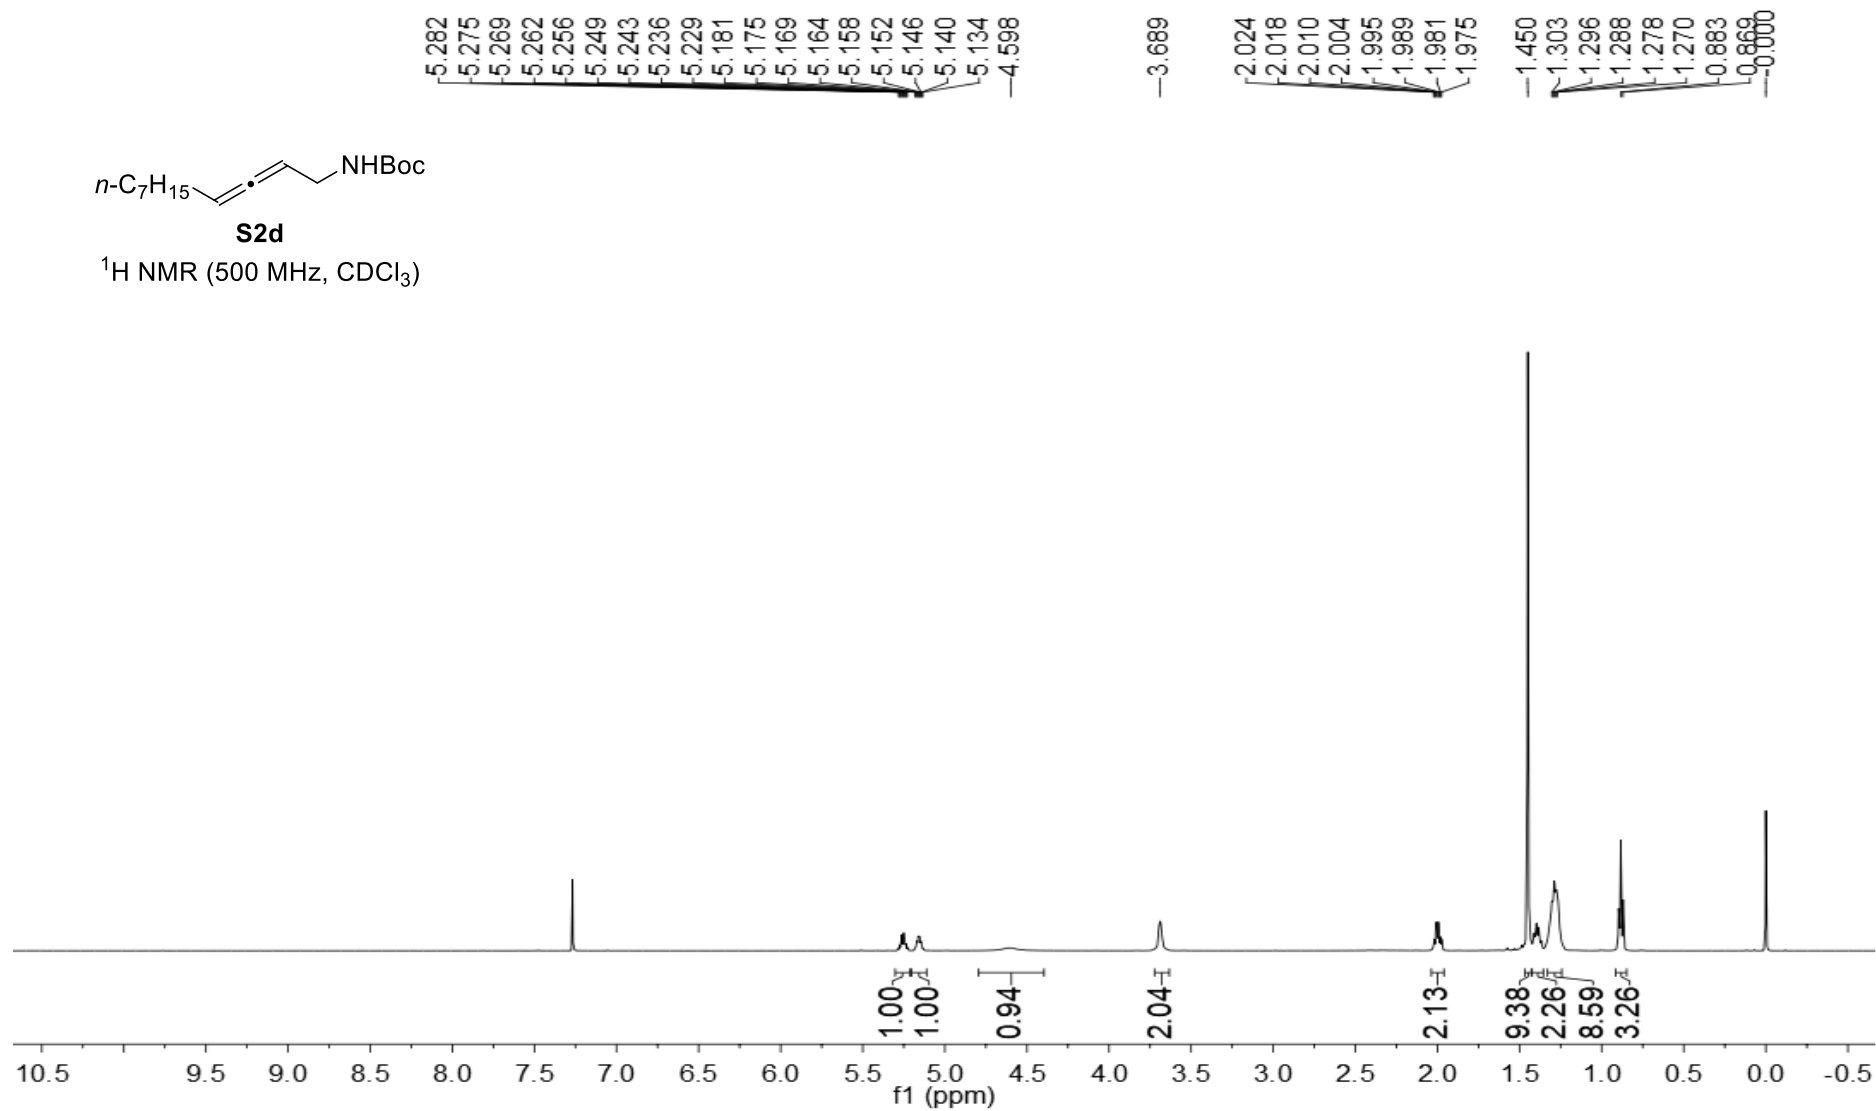

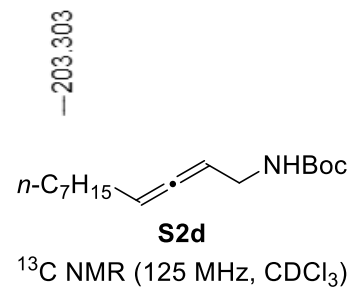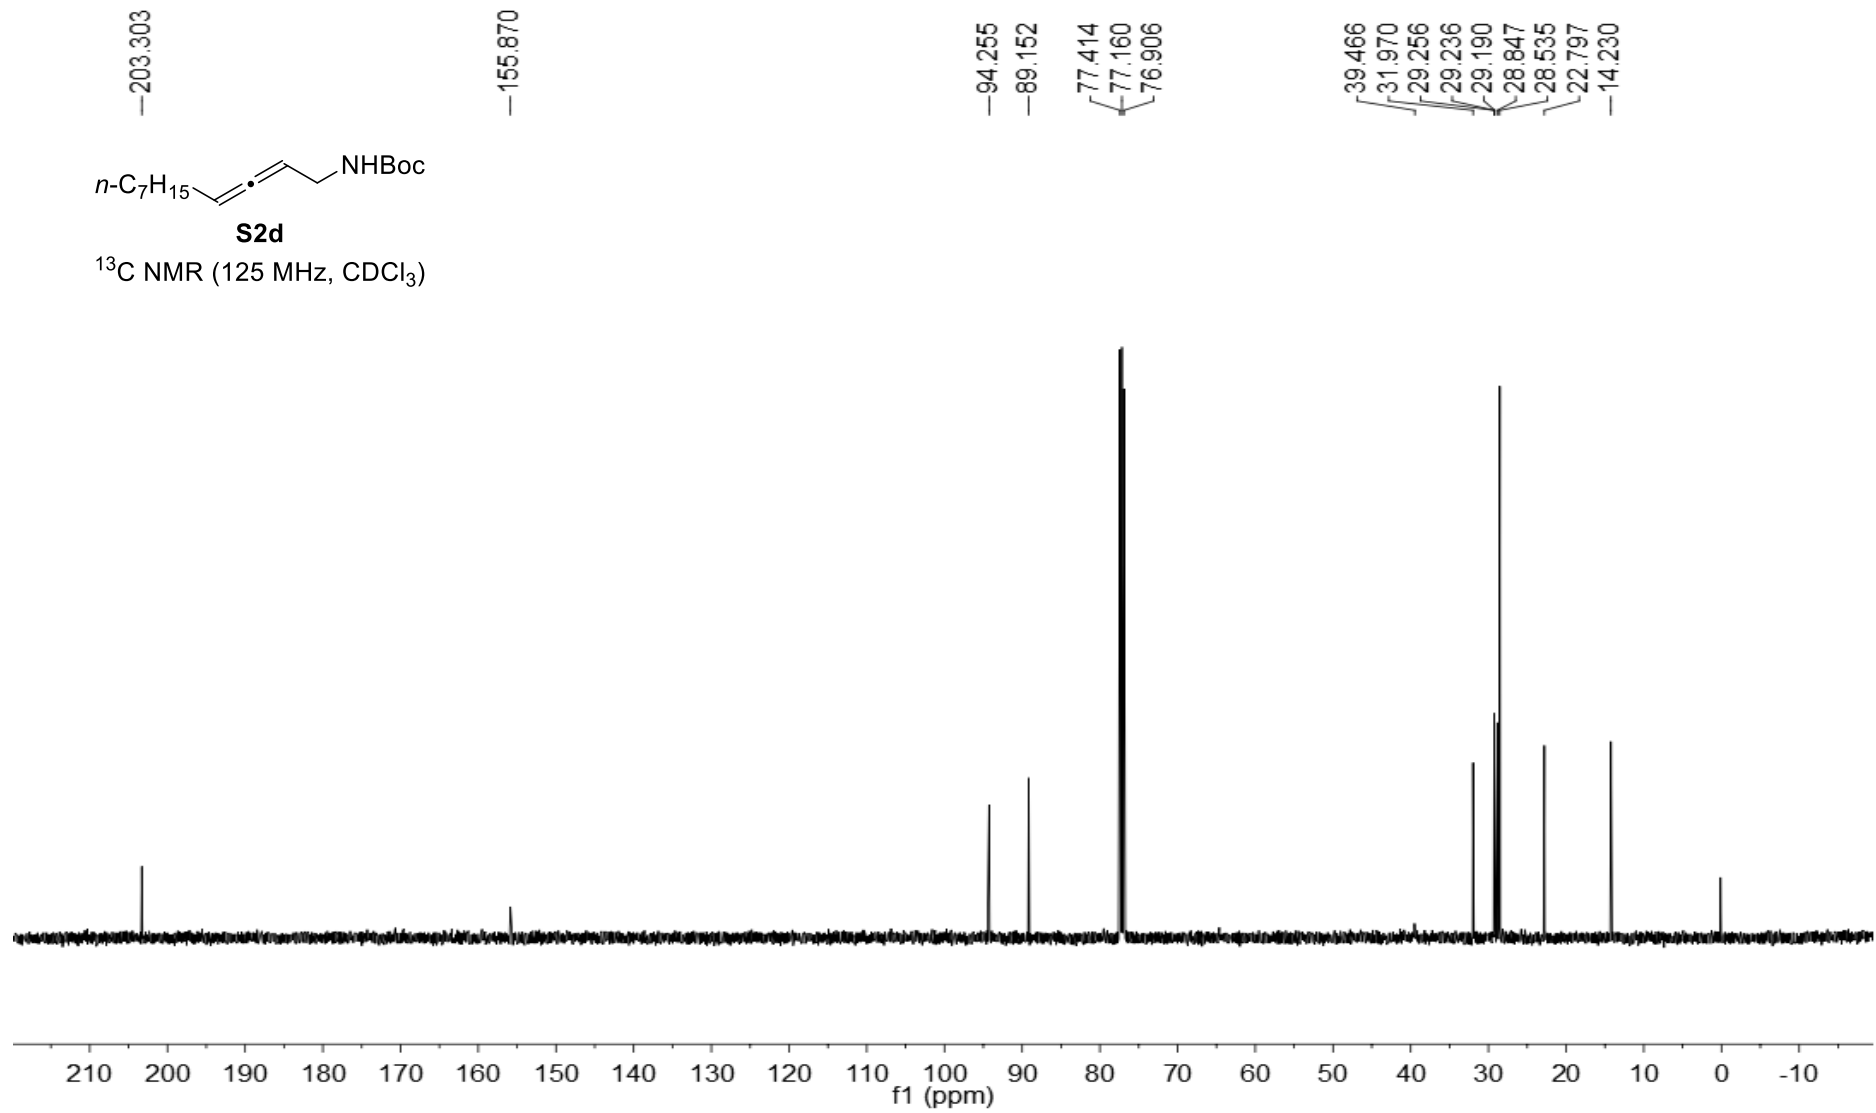

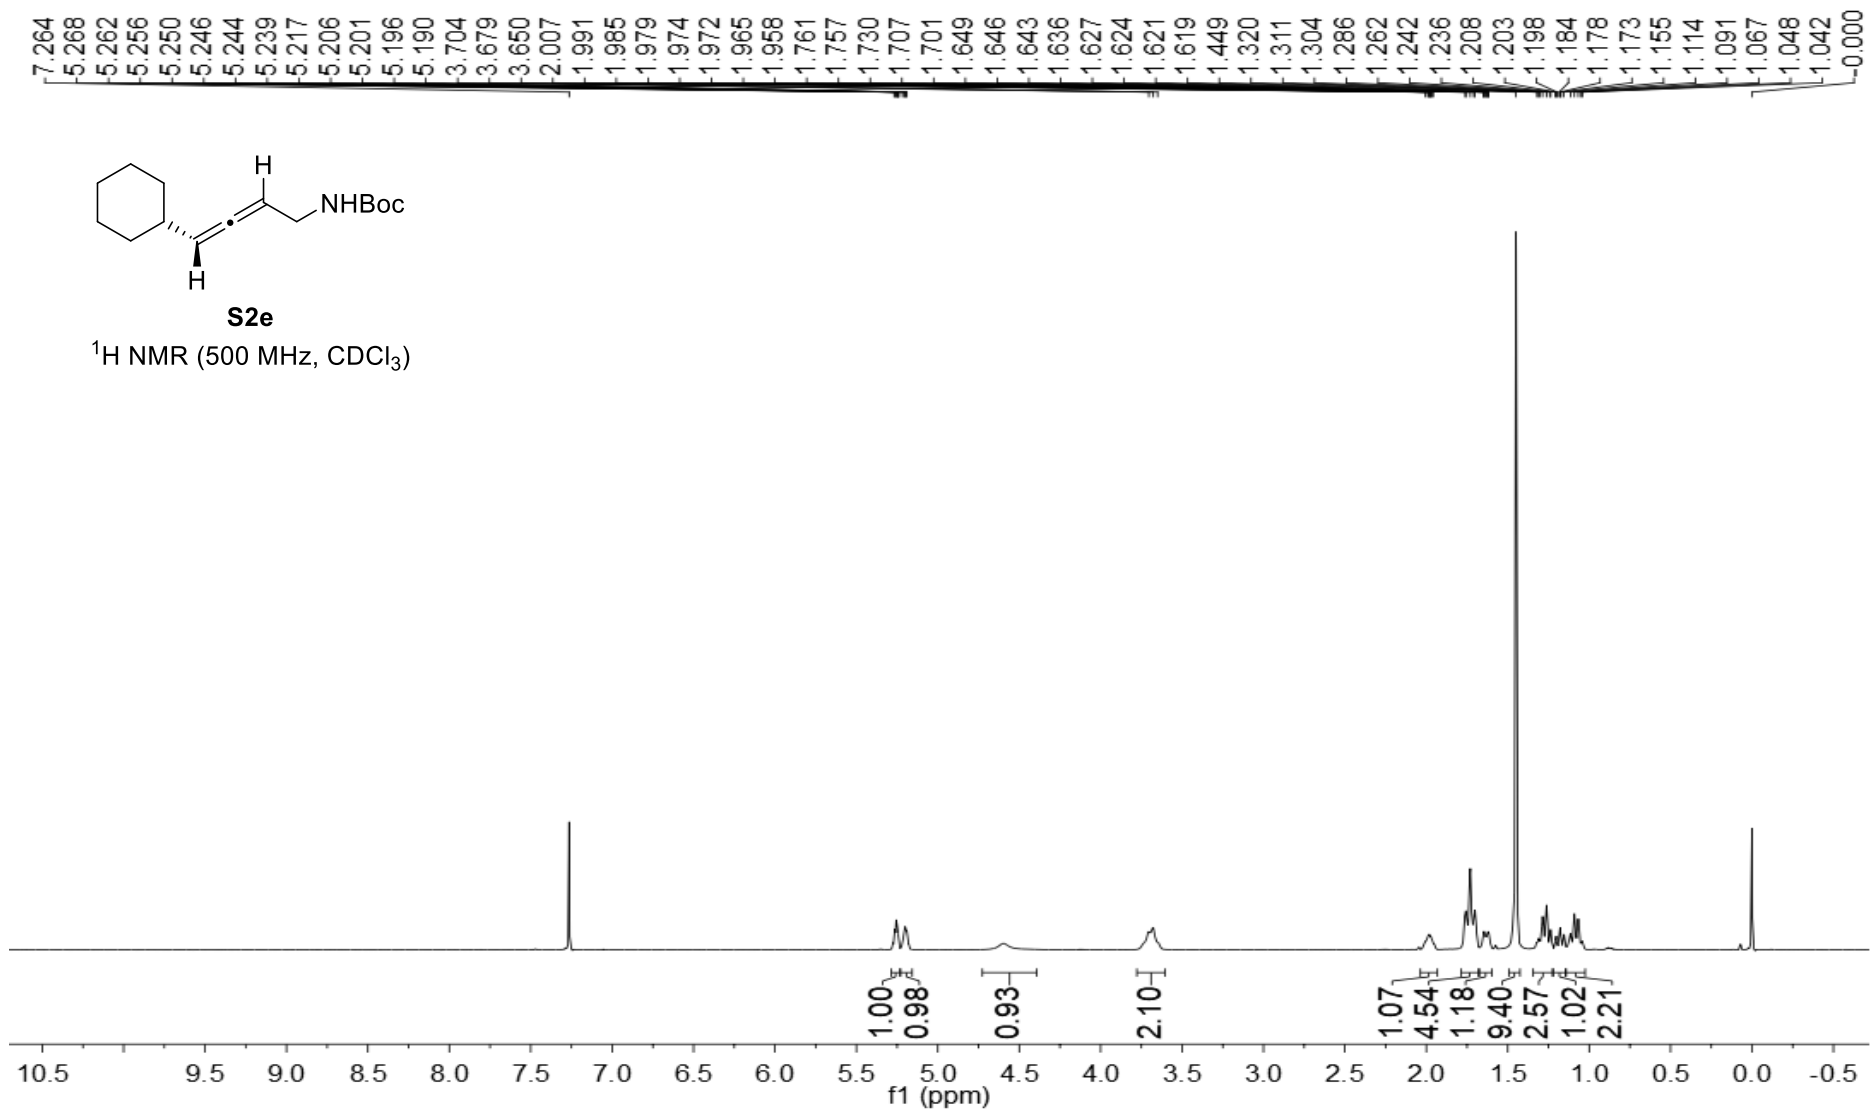

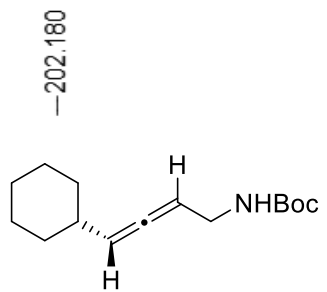

**S2e**

<sup>13</sup>C NMR (125 MHz, CDCl<sub>3</sub>)

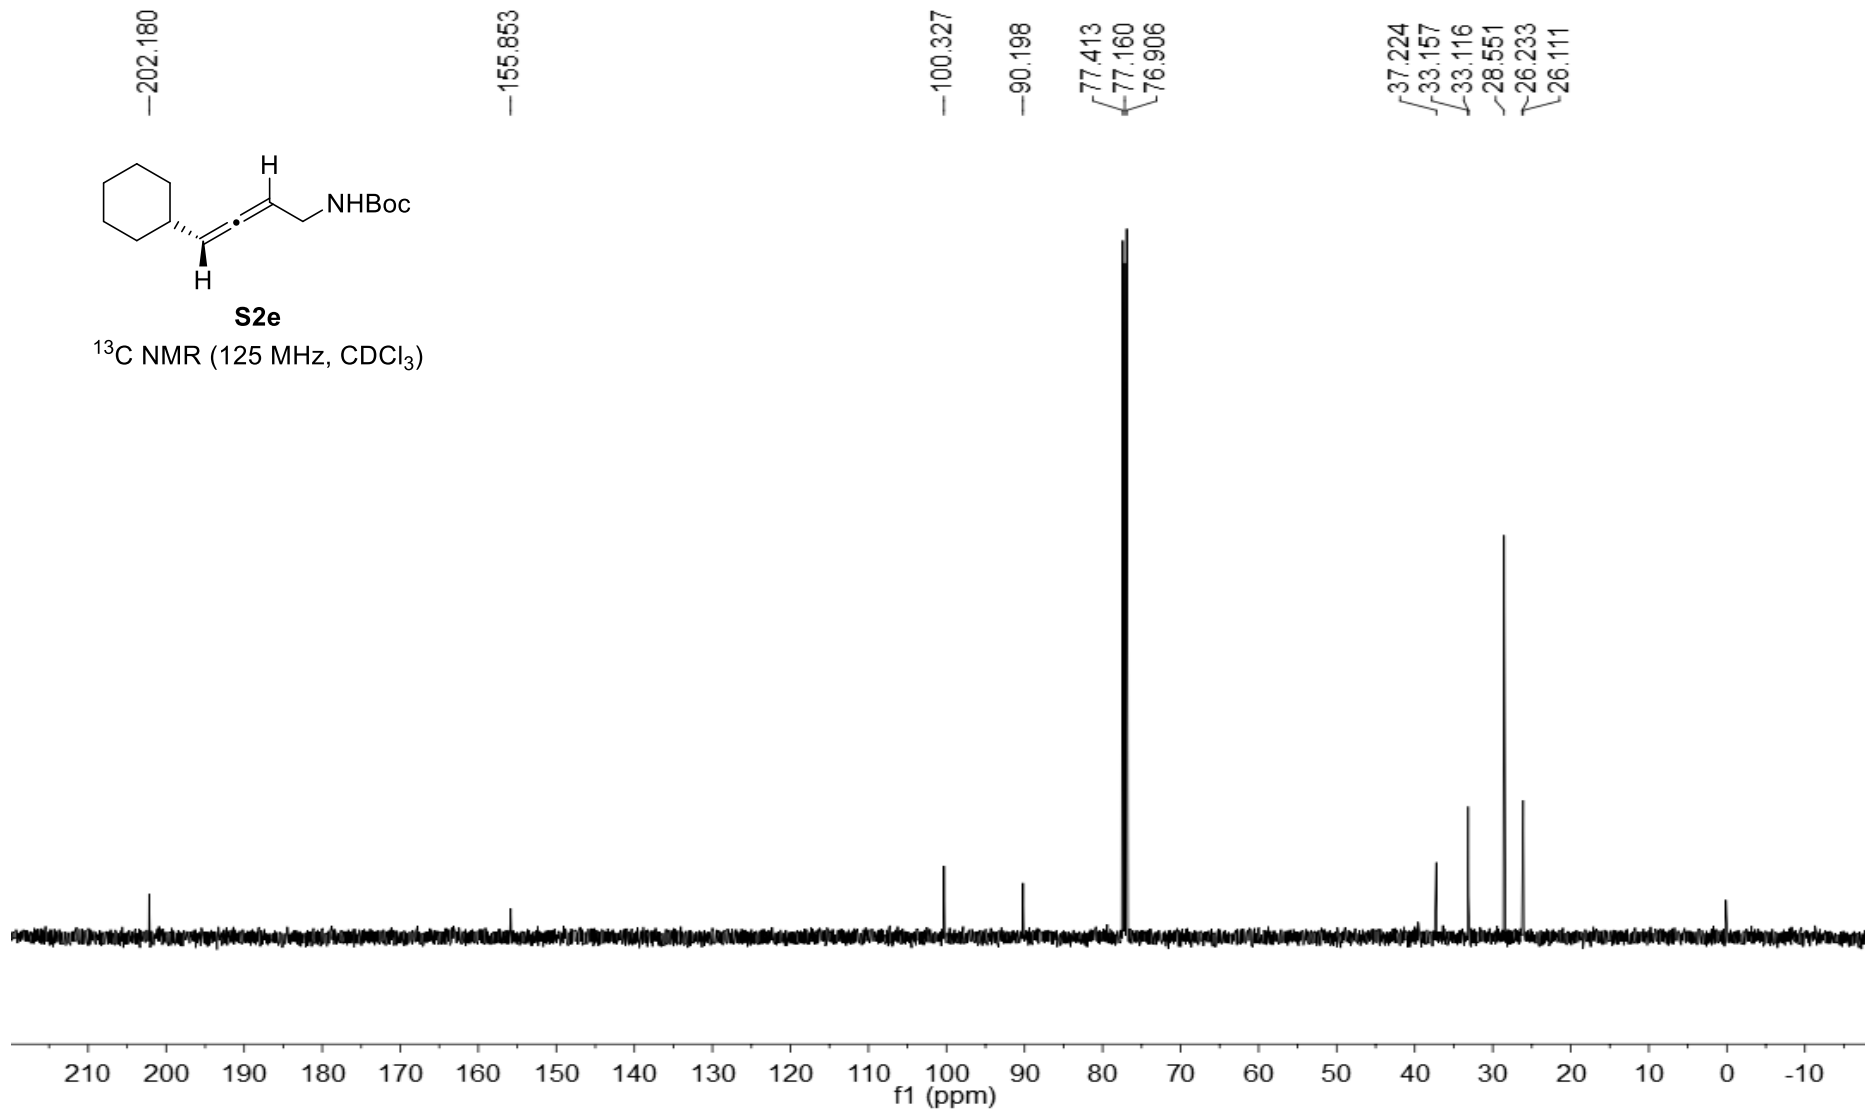

7.306  
7.300  
7.294  
7.286  
7.278  
7.273  
7.256  
7.234  
7.225  
7.220  
7.213  
7.206  
7.203  
7.199  
7.193  
7.190  
7.185  
7.177

6.288  
6.280  
6.272  
5.662  
5.648  
5.633  
5.619

4.741  
3.896  
3.856  
3.849  
3.838  
3.824  
3.815  
3.801  
3.776

1.405

0.000

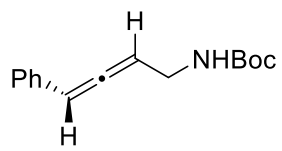

**S2f**

<sup>1</sup>H NMR (500 MHz, CDCl<sub>3</sub>)

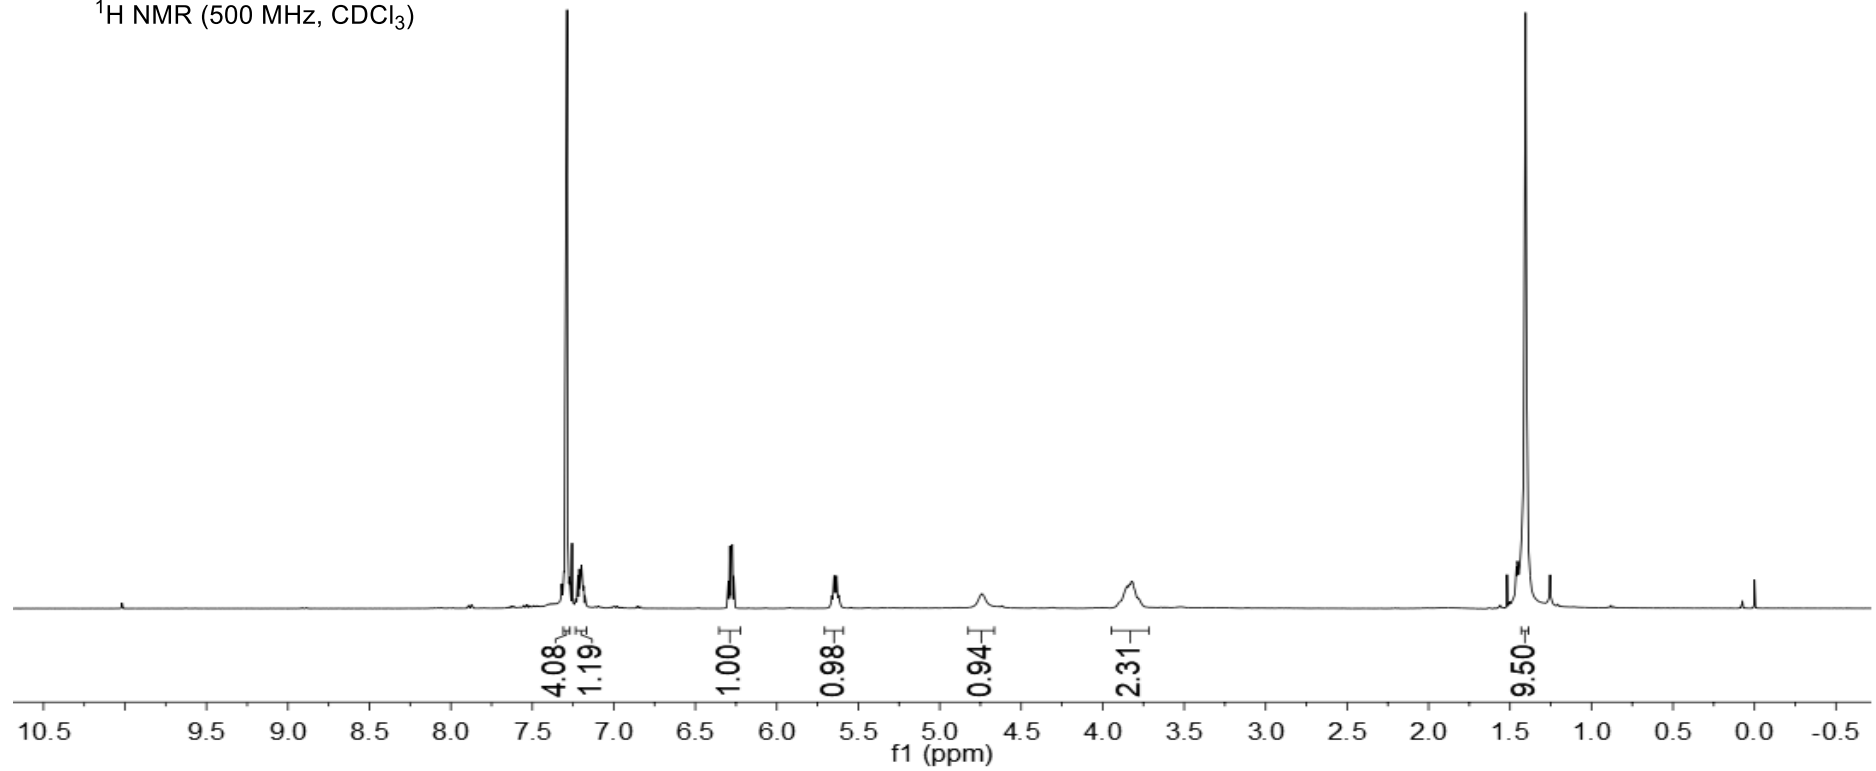

-204.534

-155.823

134.041

128.733

127.296

126.995

-97.509

-93.574

79.626

77.413

77.160

76.906

-39.179

-28.452

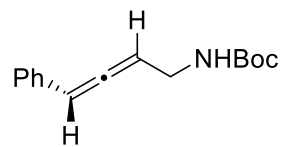

**S2f**

<sup>13</sup>C NMR (125 MHz, CDCl<sub>3</sub>)

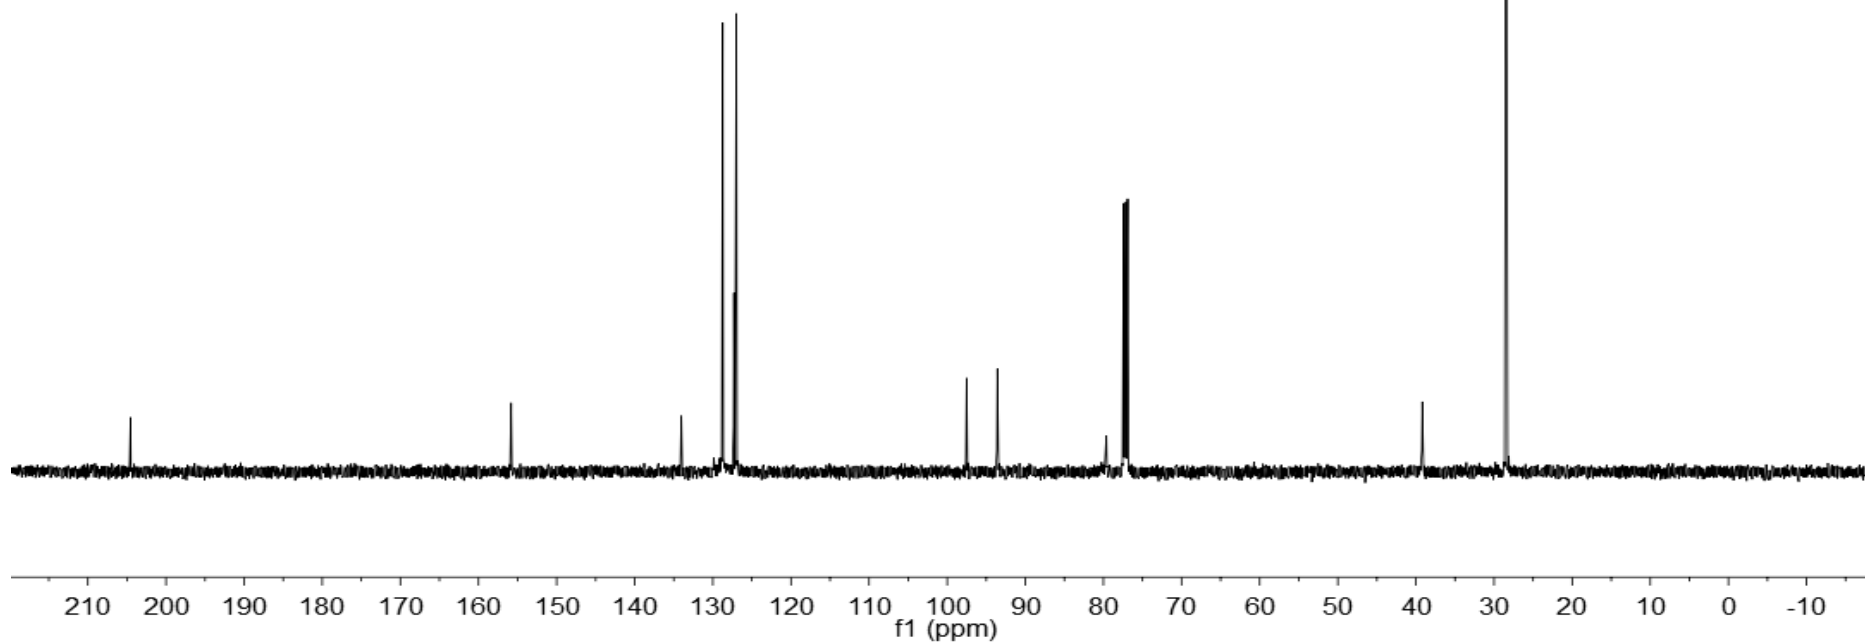

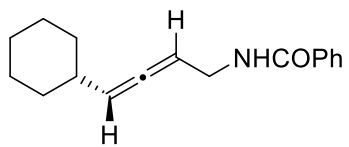

**S14a**

$^1\text{H}$  NMR (500 MHz,  $\text{CDCl}_3$ )

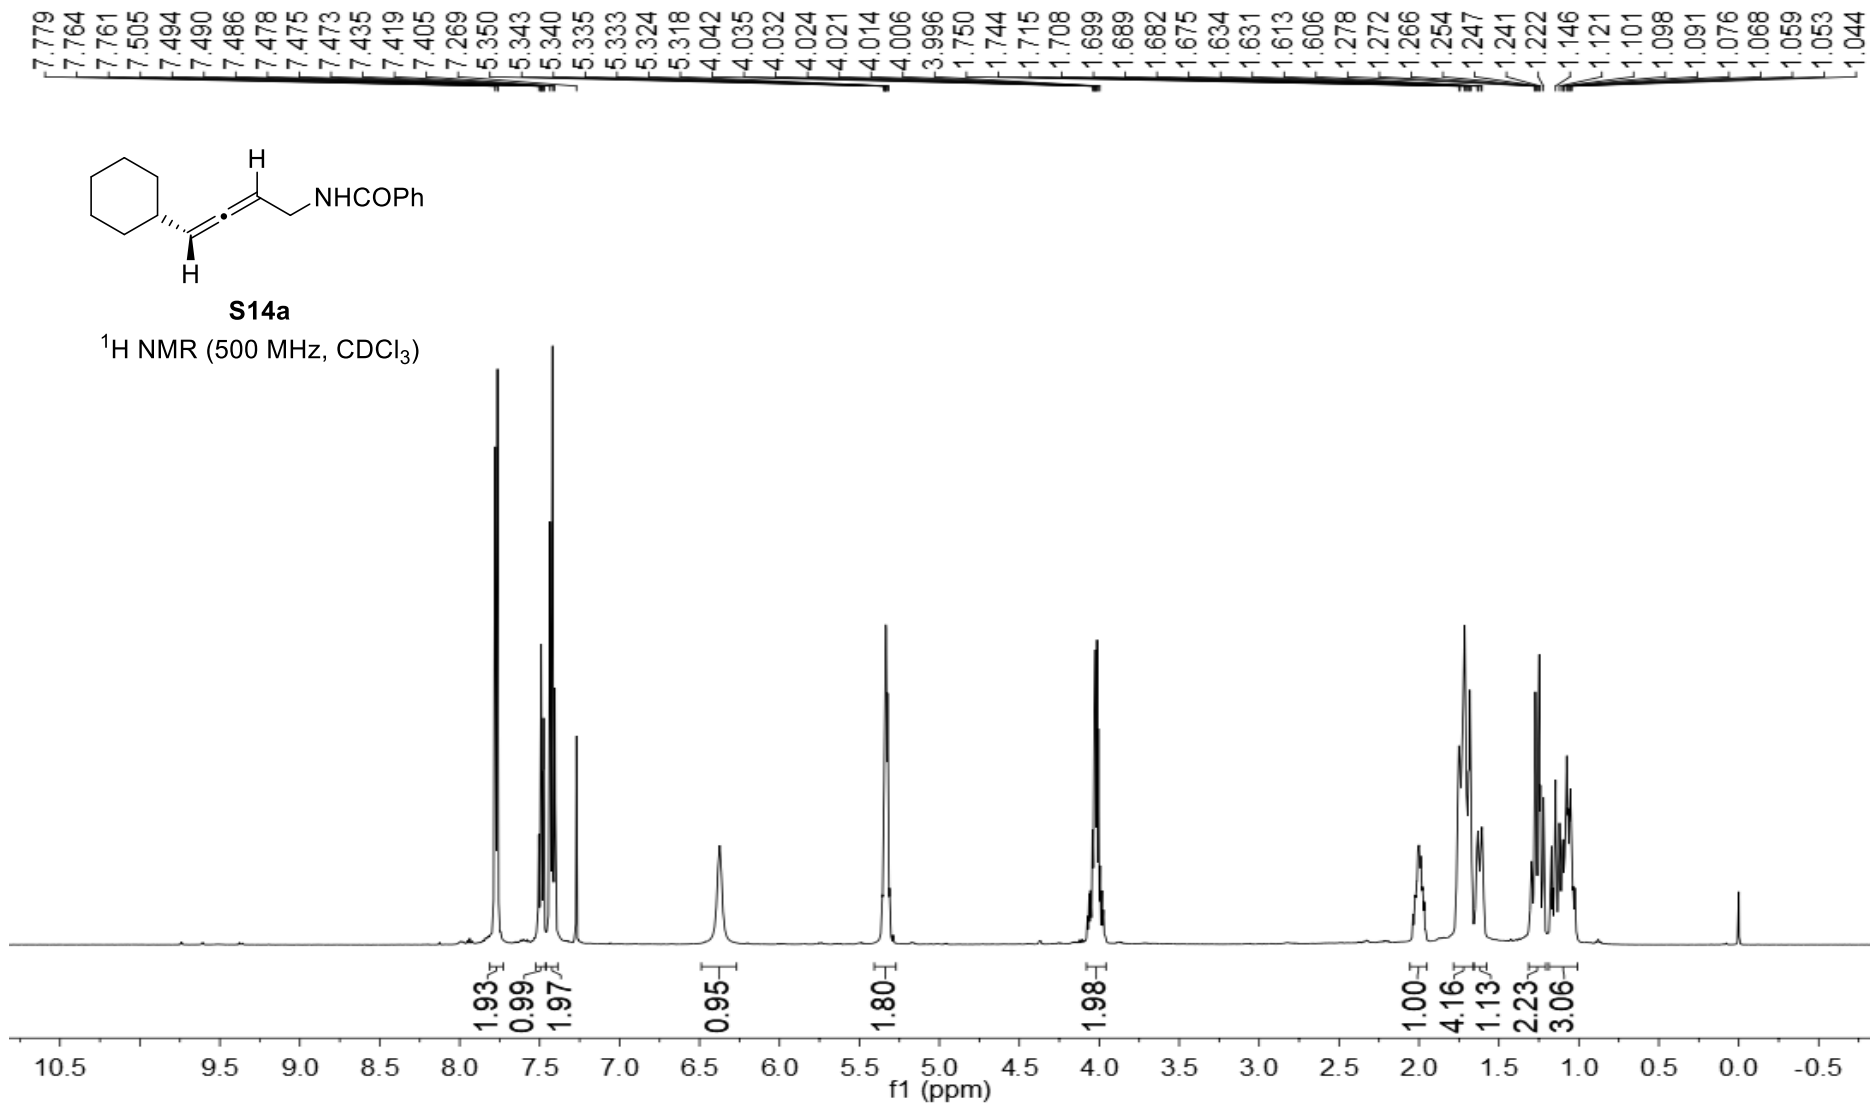

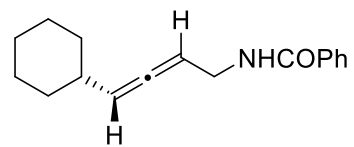

**S14a**

$^{13}\text{C}$  NMR (125 MHz,  $\text{CDCl}_3$ )

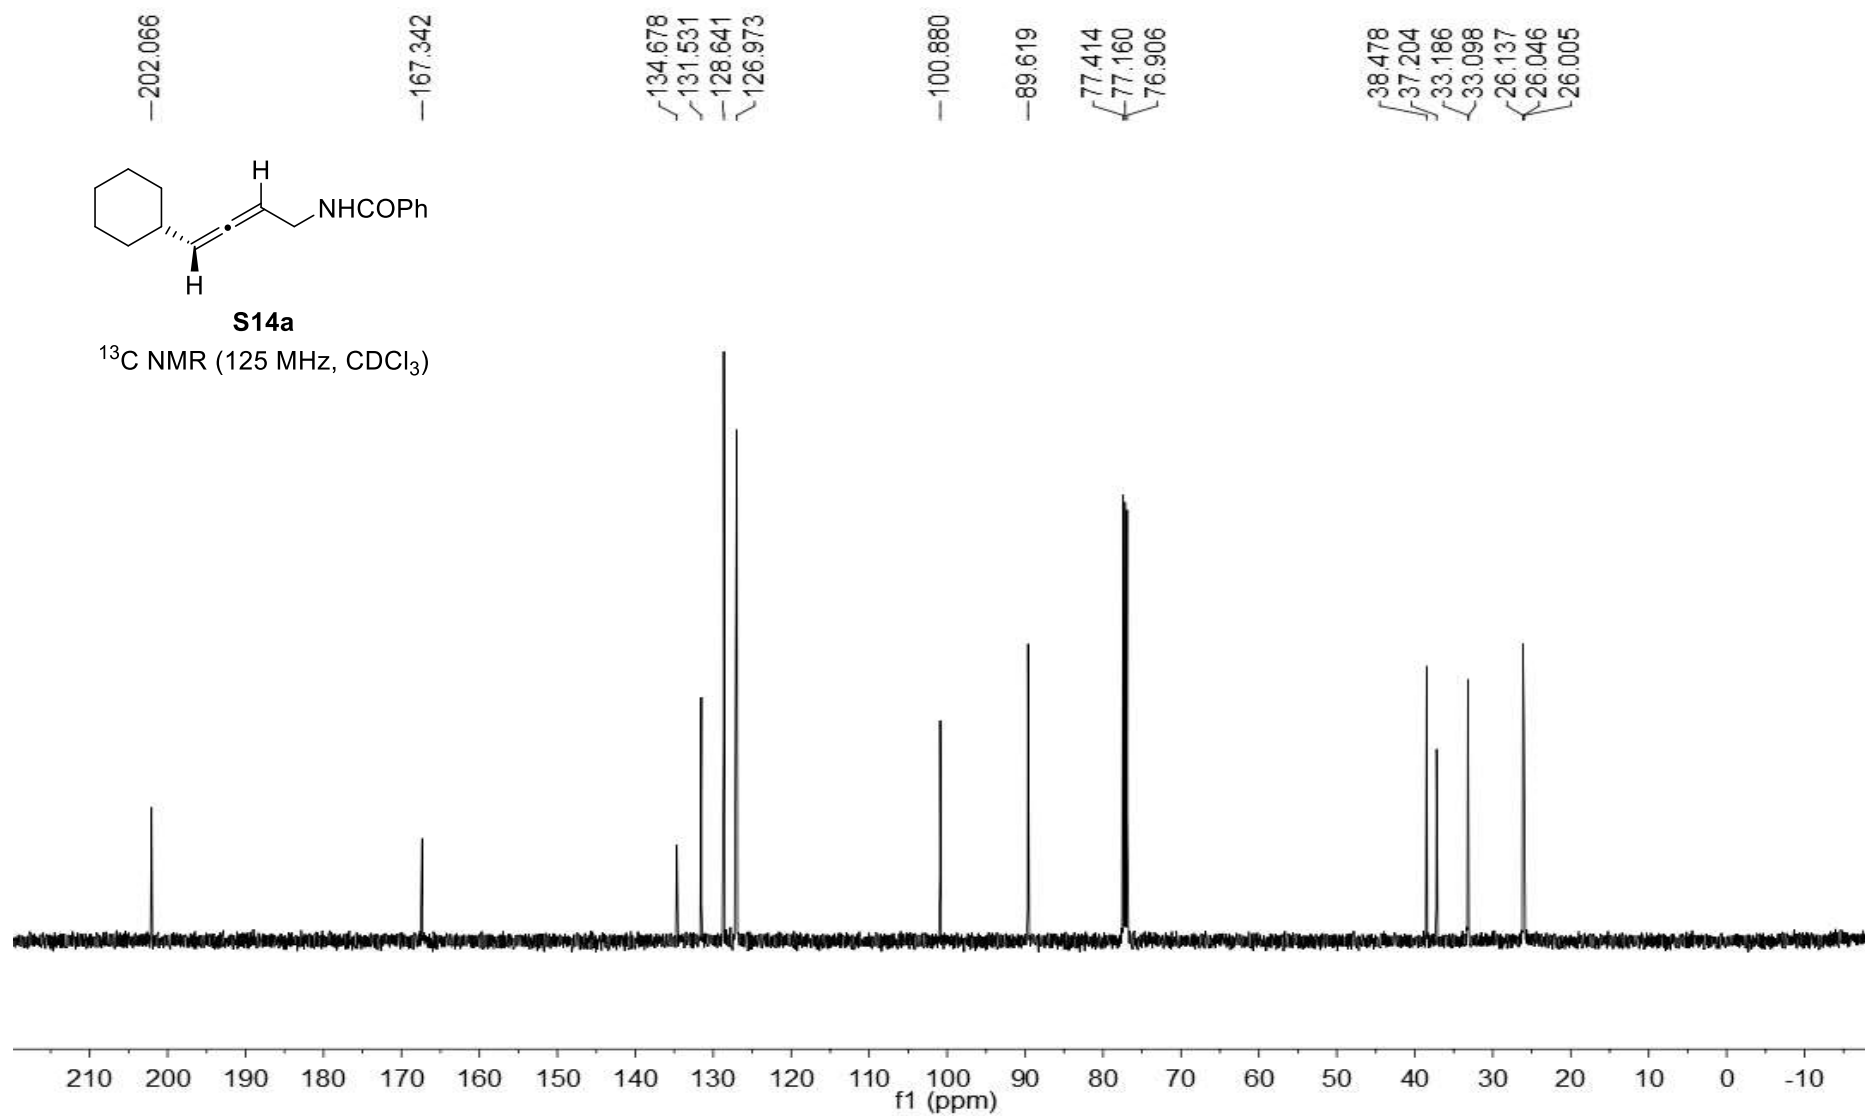



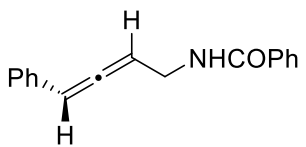

**S14b**

$^1\text{H}$  NMR (500 MHz,  $\text{CDCl}_3$ )

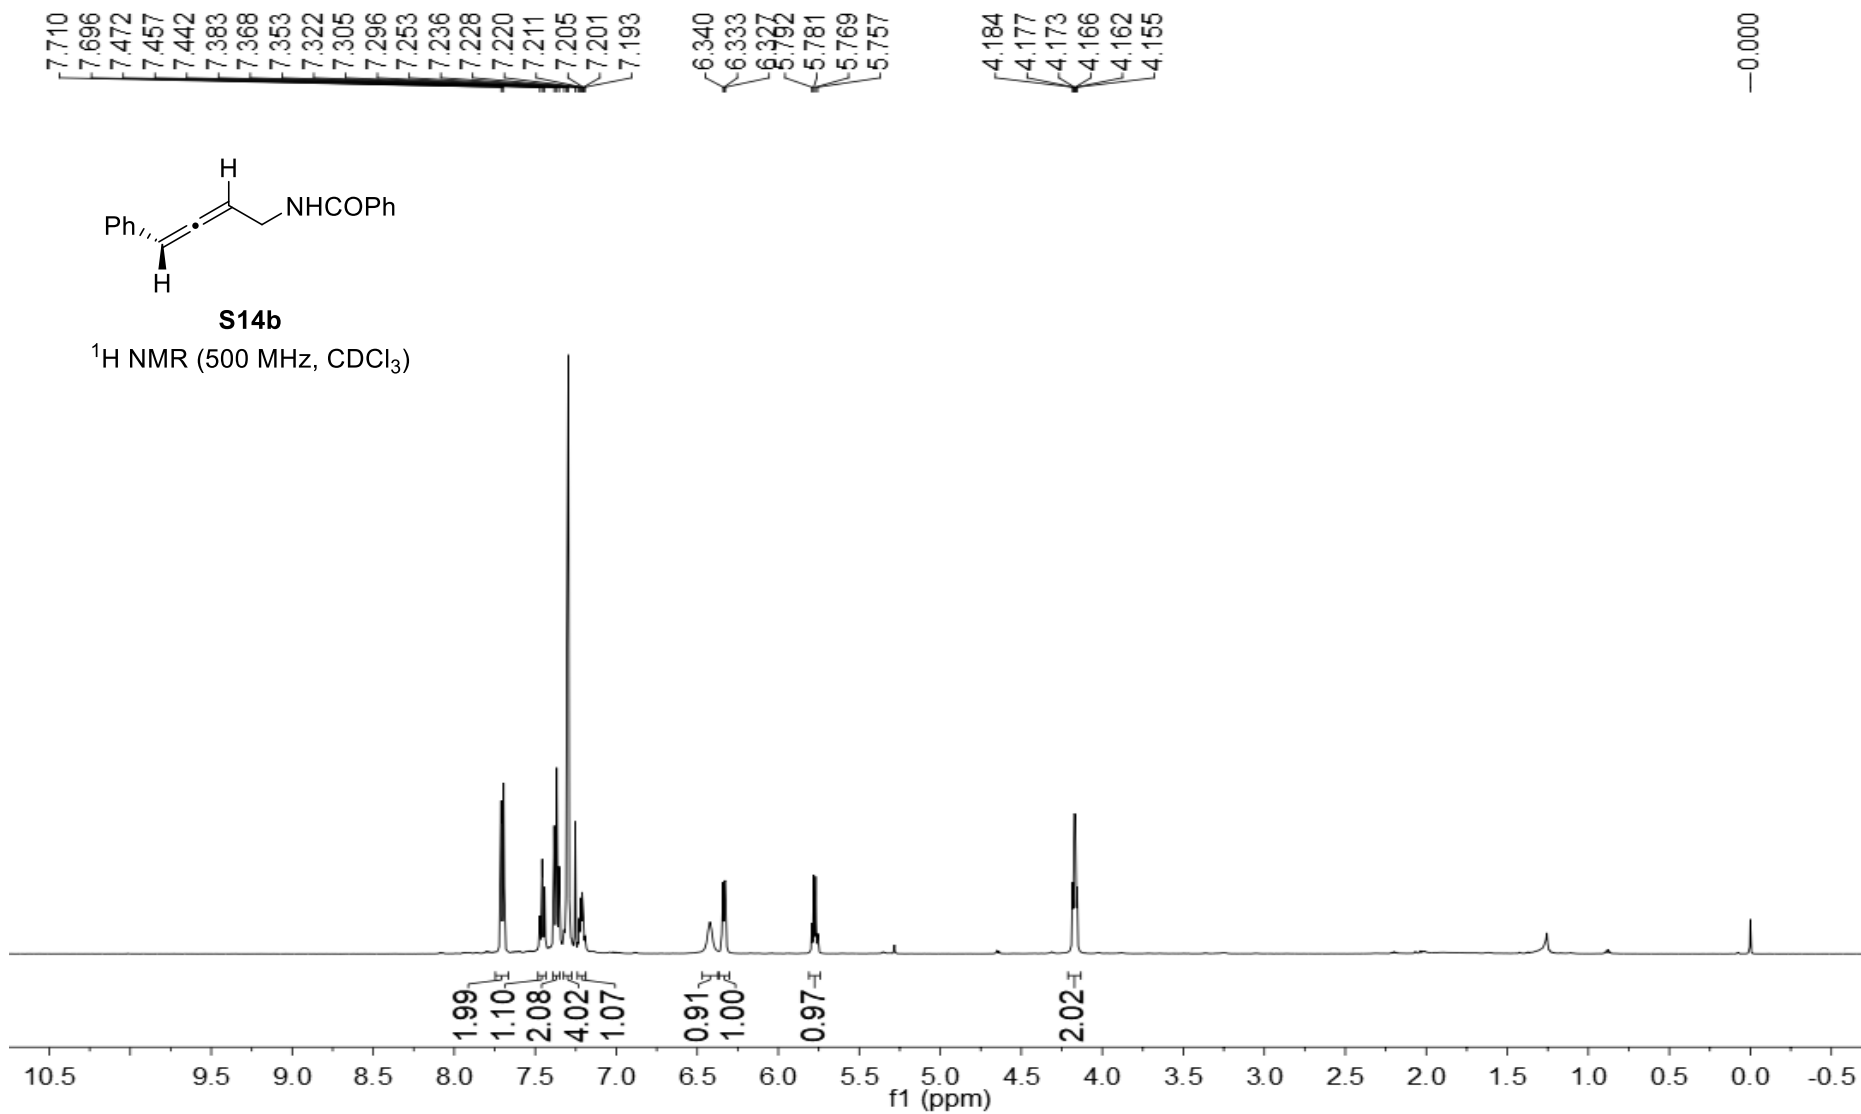

-204.673

-167.598

134.551  
133.779  
131.592  
128.830  
128.675  
127.487  
127.010  
126.988

-97.869  
-93.023

77.413  
77.160  
76.906

-38.389

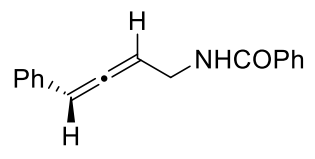

**S14b**

<sup>13</sup>C NMR (125 MHz, CDCl<sub>3</sub>)

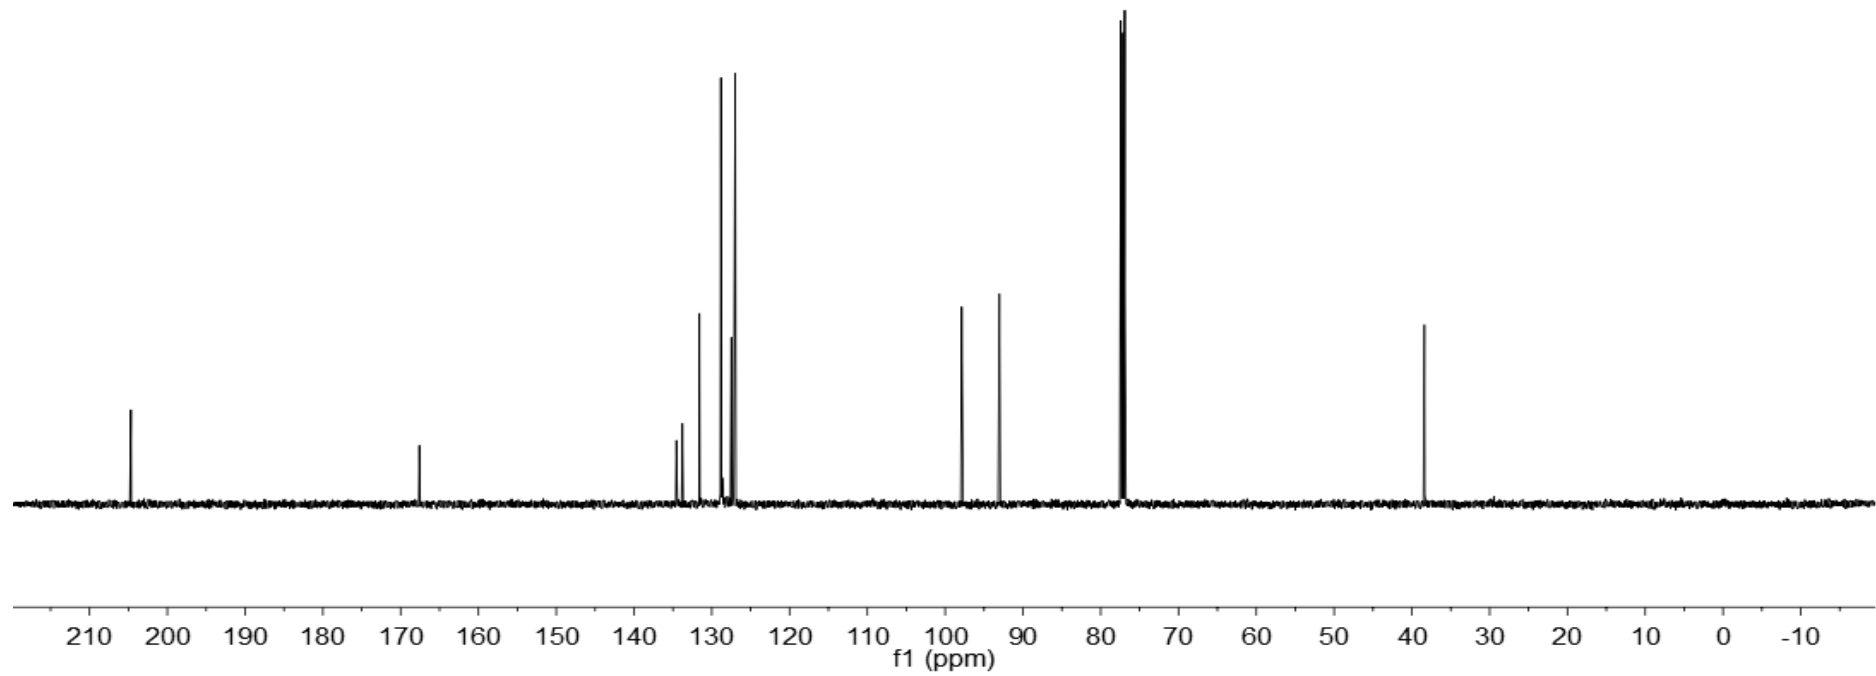

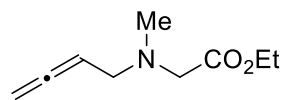

**1a**

<sup>1</sup>H NMR (400 MHz, CDCl<sub>3</sub>)

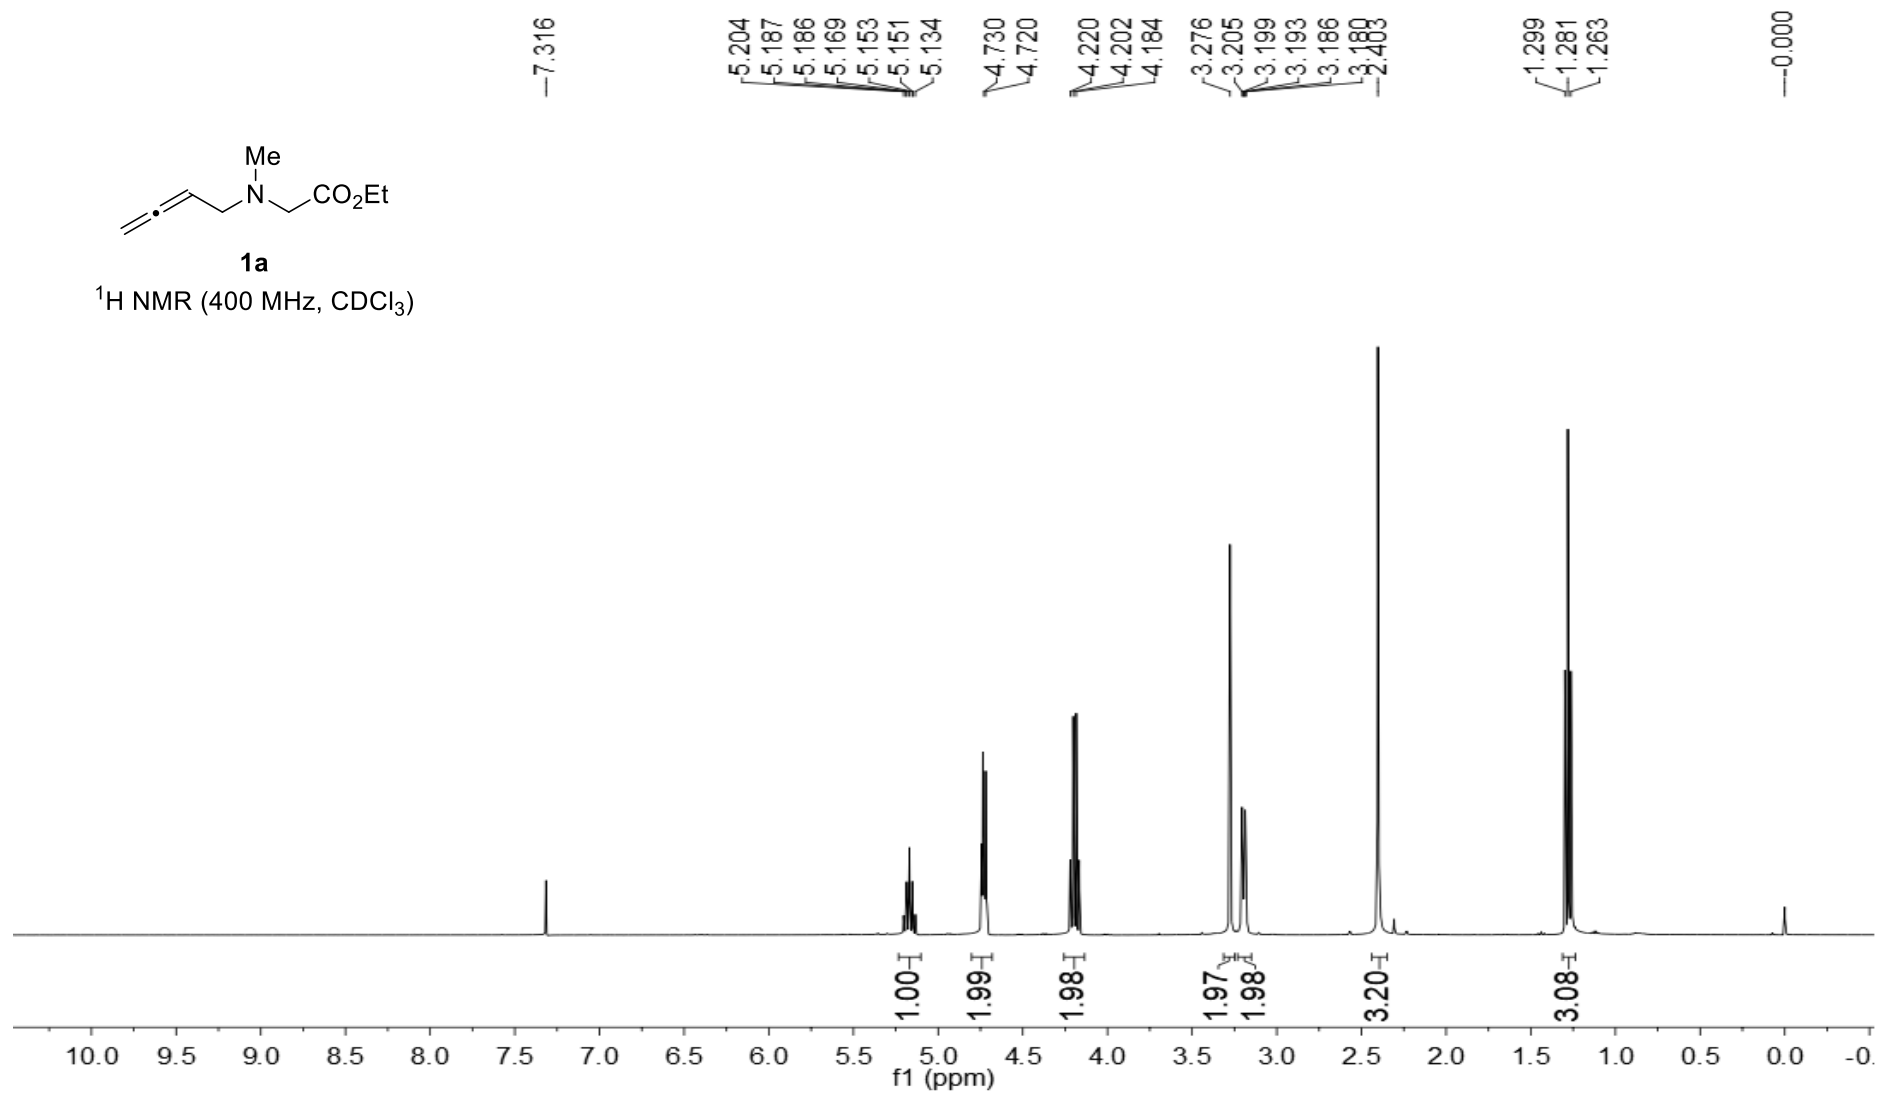

-209.672

-170.870

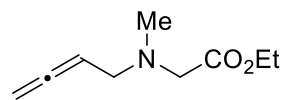

**1a**

<sup>13</sup>C NMR (100 MHz, CDCl<sub>3</sub>)

-86.486

-77.478

-77.160

-76.842

-74.947

-60.569

-57.435

-56.138

-42.235

-14.284

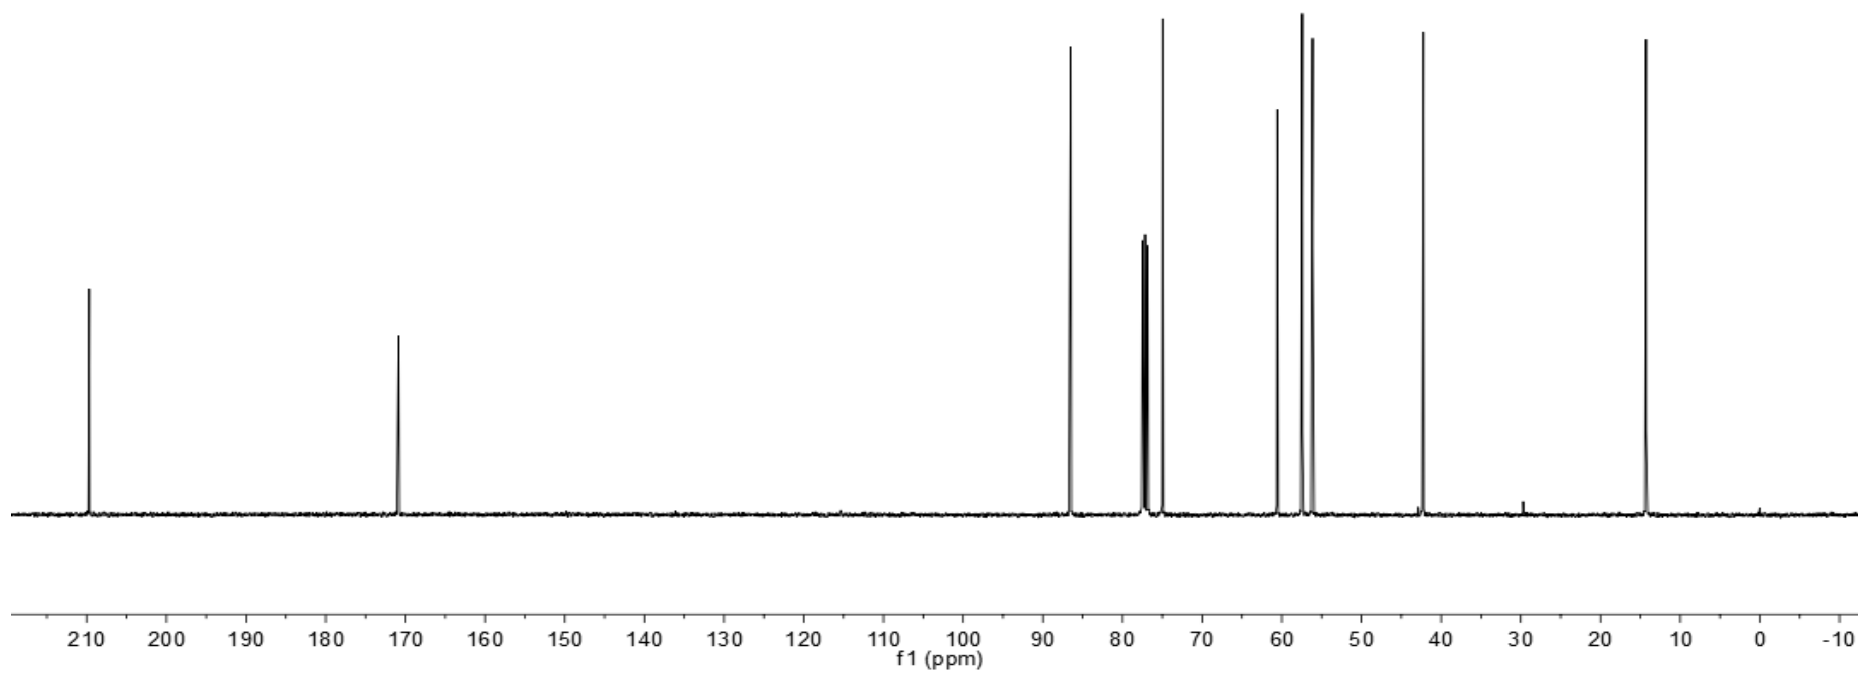

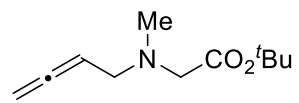

**1b**

<sup>1</sup>H NMR (400 MHz, CDCl<sub>3</sub>)

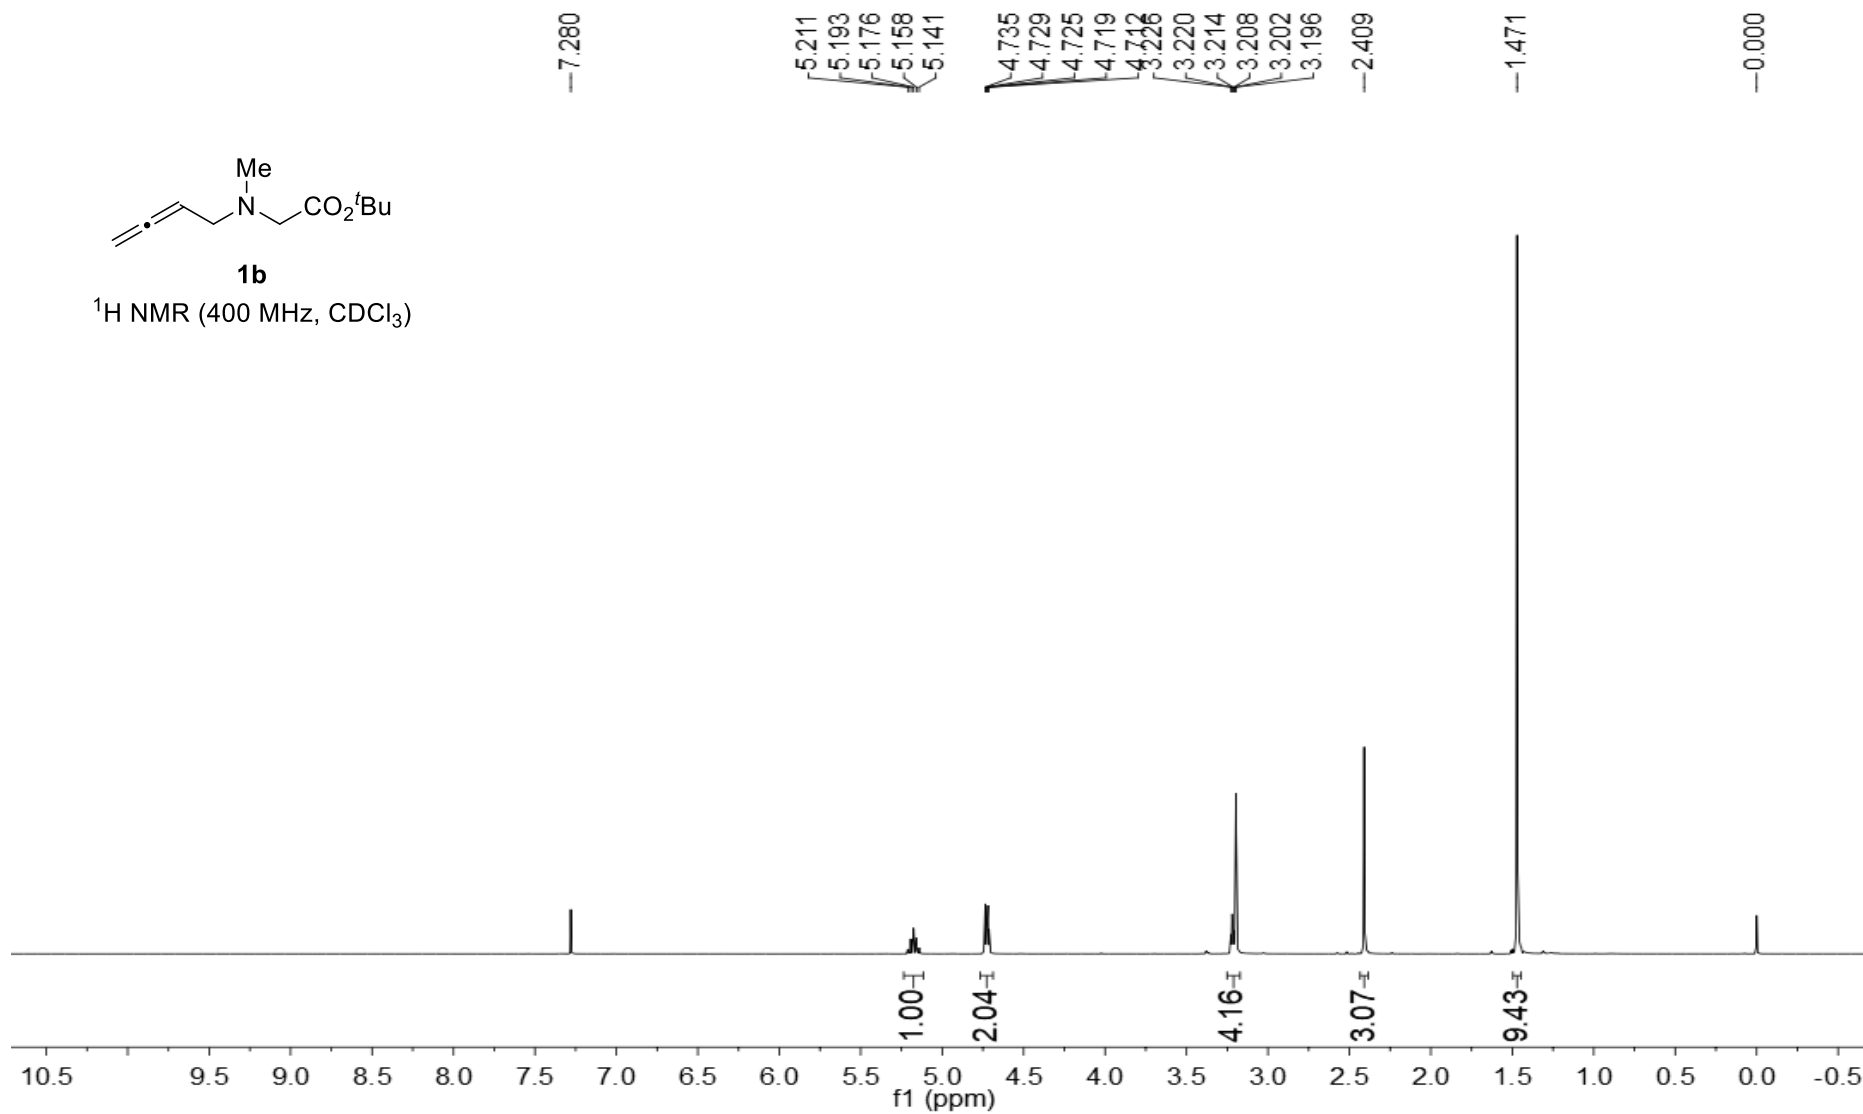

-209.743

-170.085

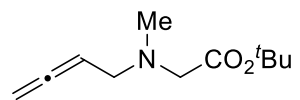

**1b**

<sup>13</sup>C NMR (100 MHz, CDCl<sub>3</sub>)

86.706  
81.126  
77.478  
77.160  
76.843  
74.992

58.076  
56.014

-42.086

-28.252

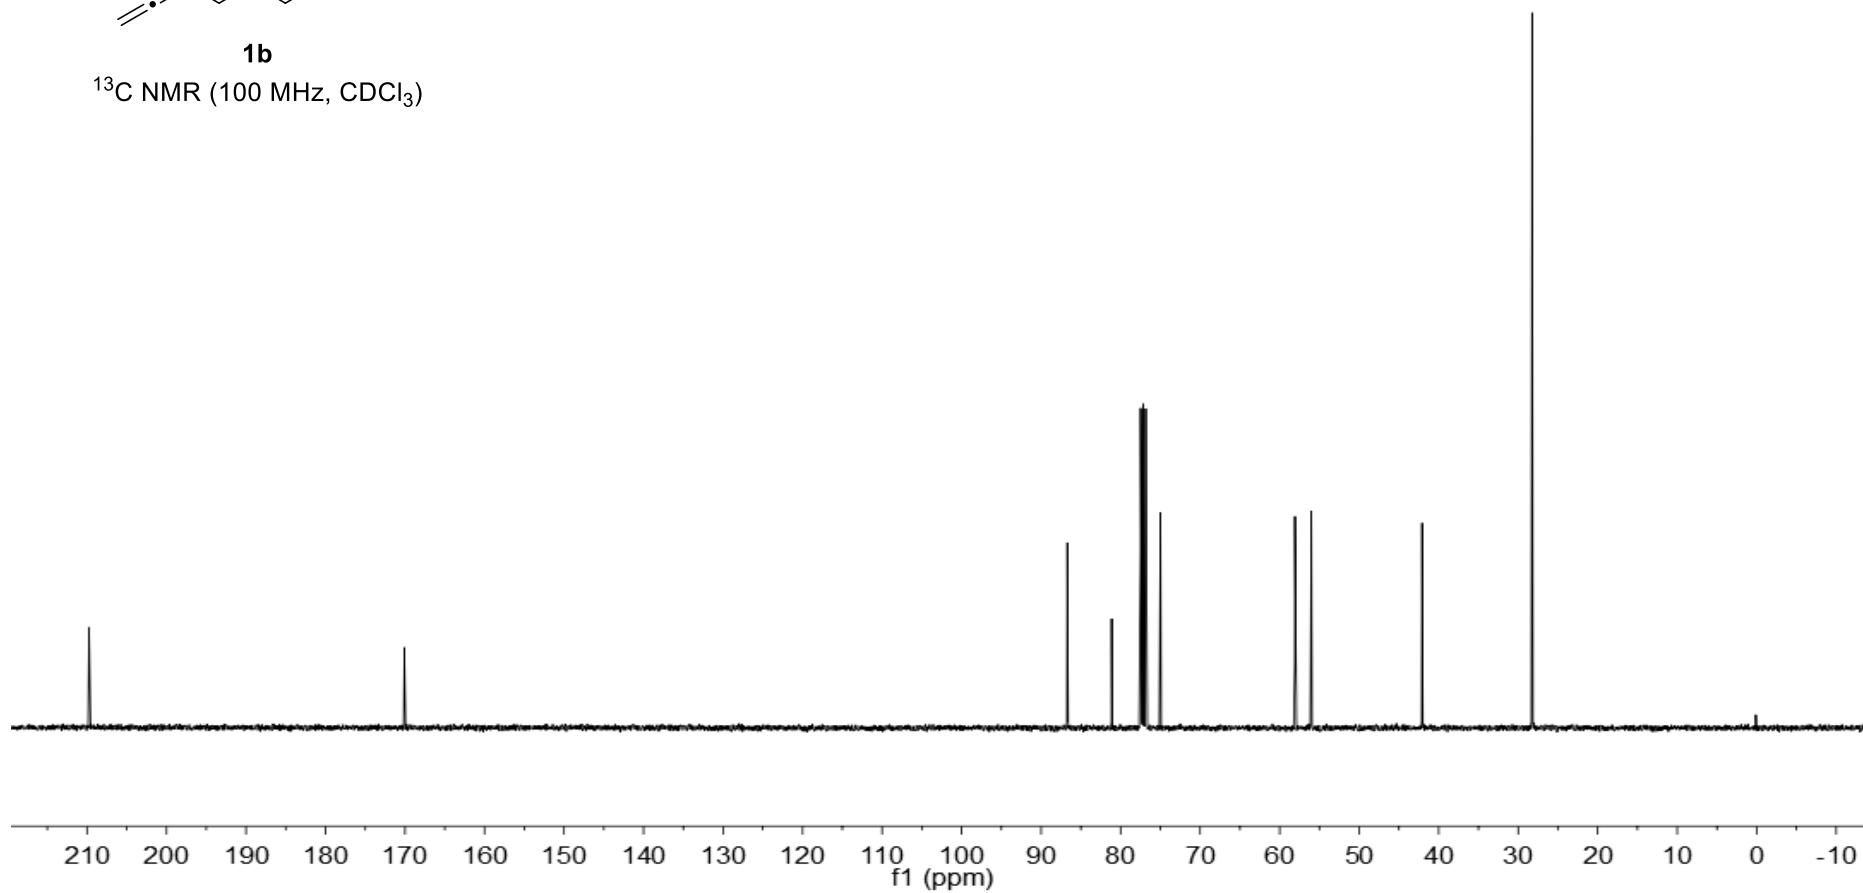

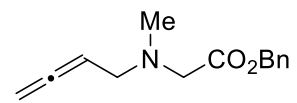

**1c**

<sup>1</sup>H NMR (400 MHz, CDCl<sub>3</sub>)

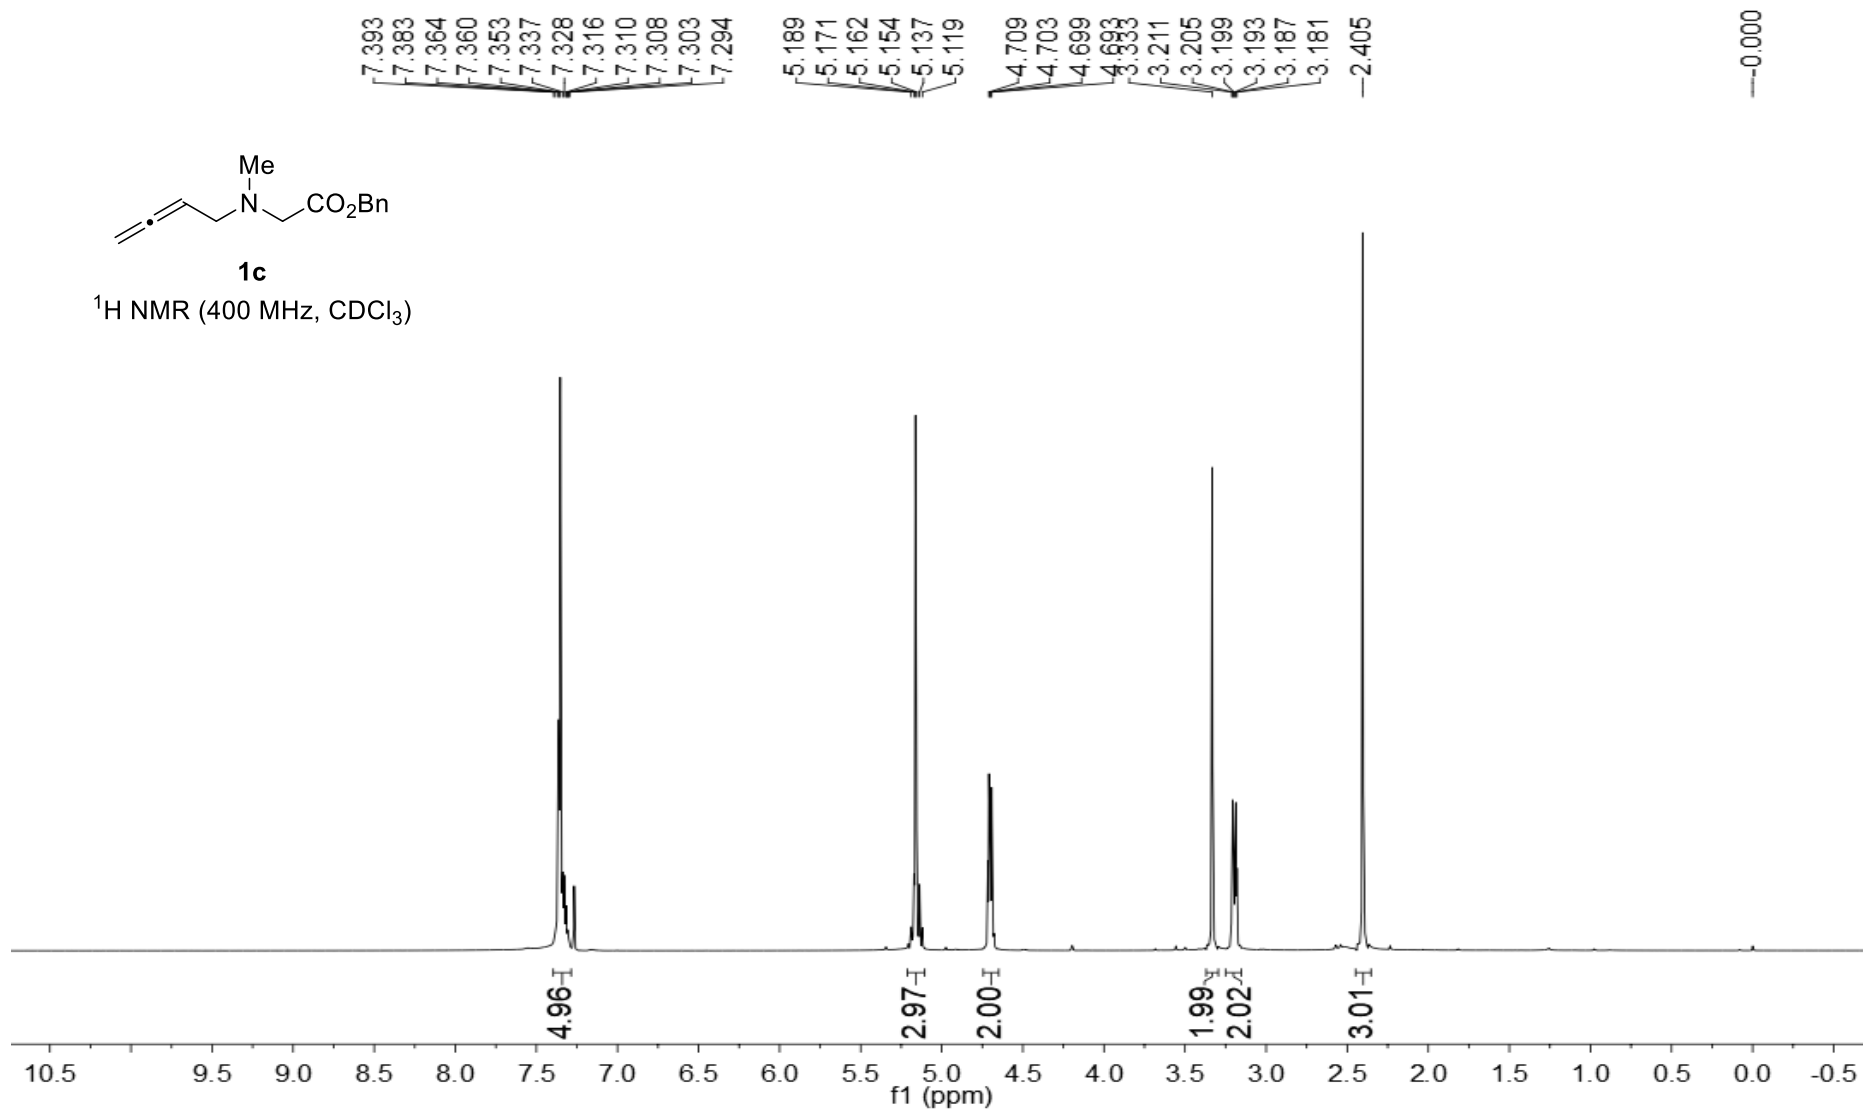

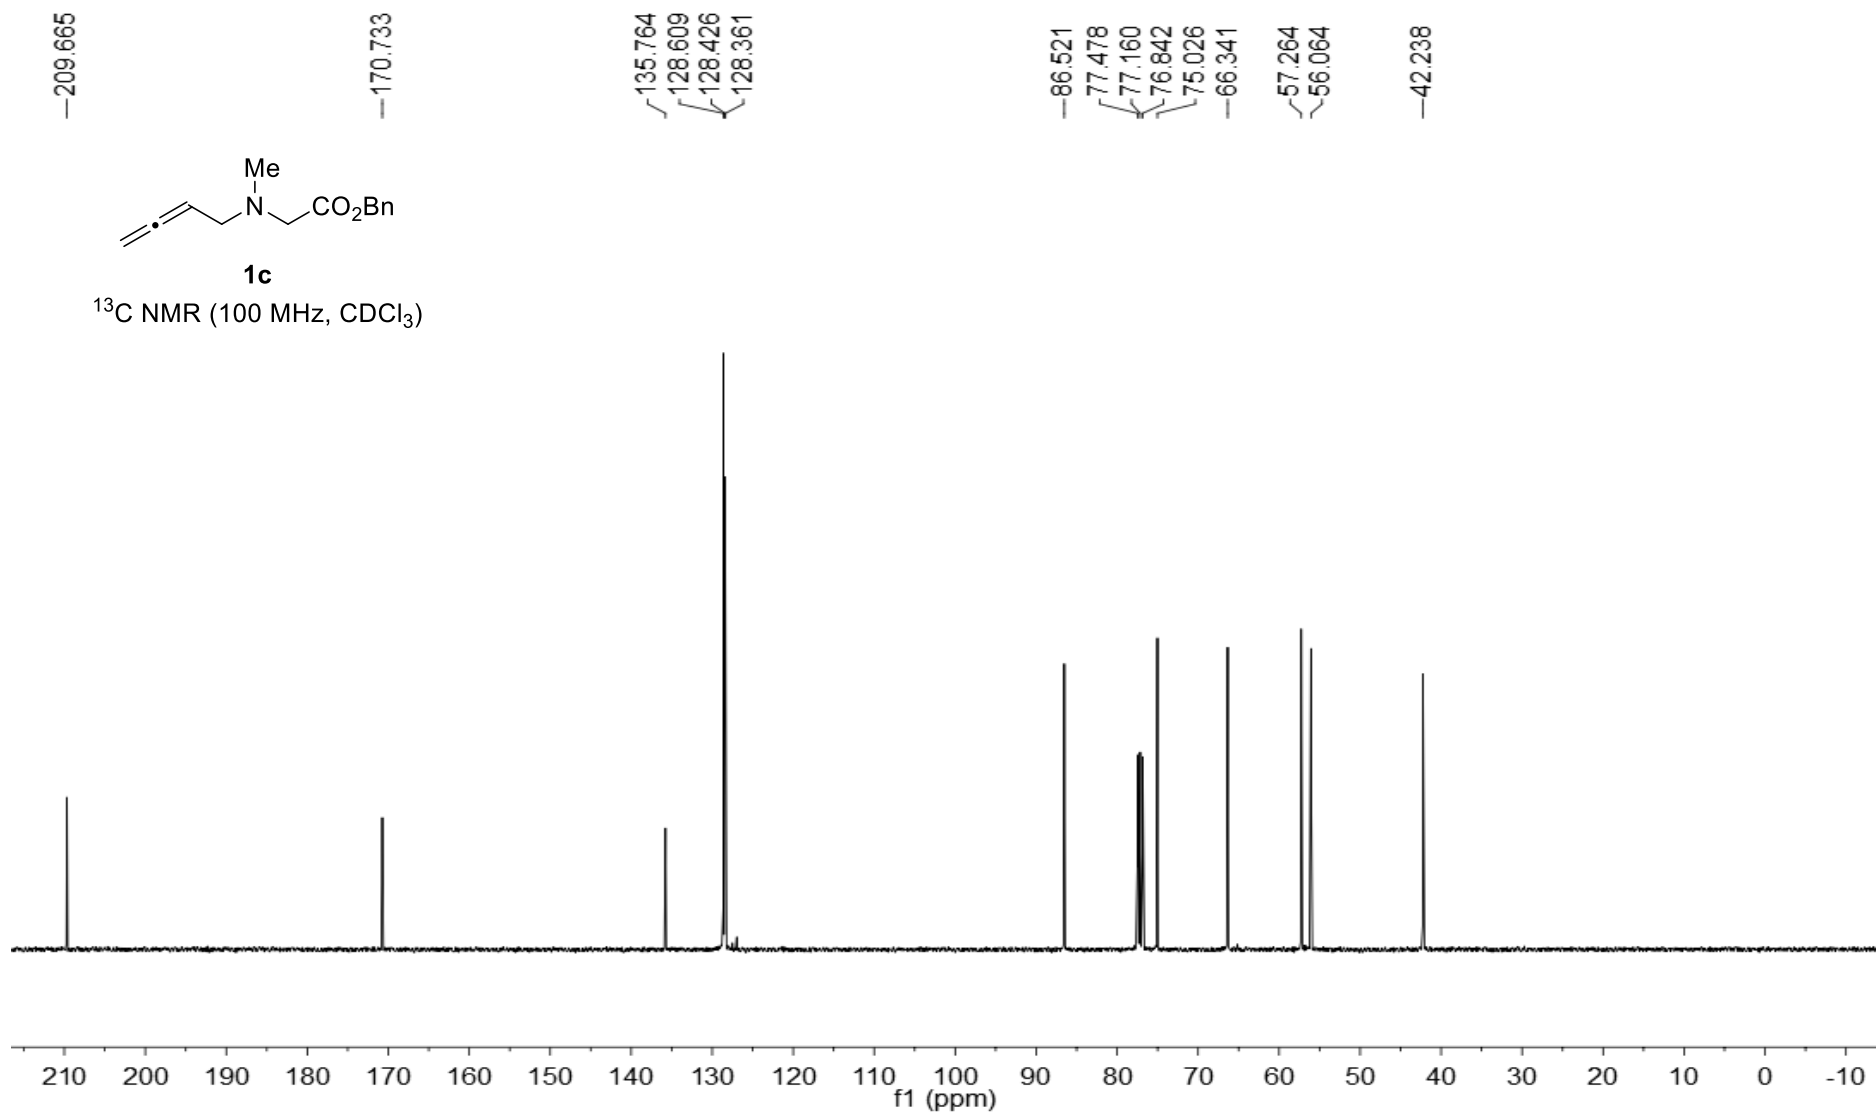



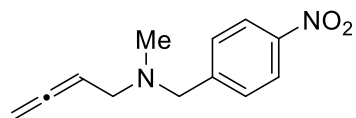

**1d**

<sup>1</sup>H NMR (400 MHz, CDCl<sub>3</sub>)

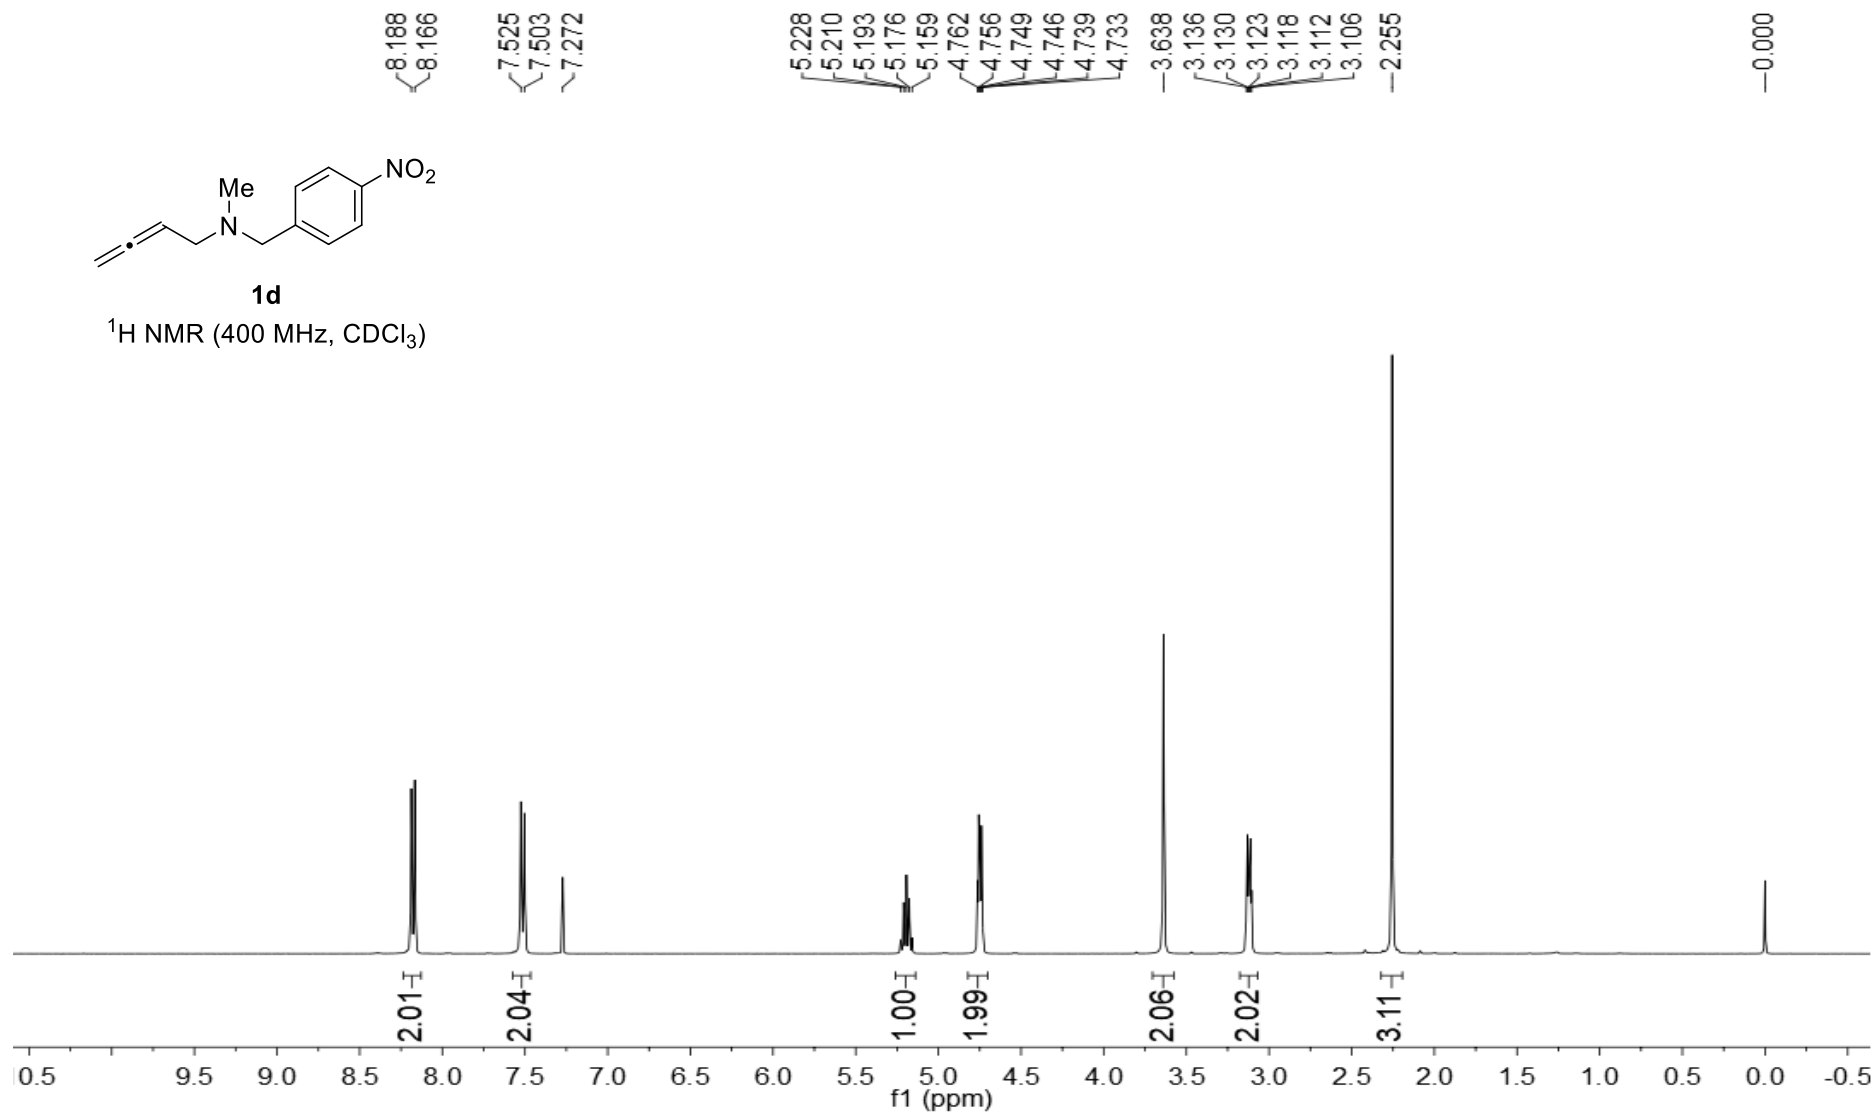

—209.623

—147.185  
—147.153

—129.537  
—123.587

—86.593  
—77.478  
—77.160  
—76.842  
—75.151

—60.200  
—56.224

—42.058

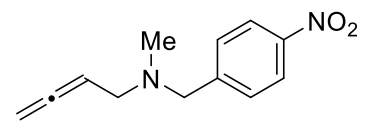

**1d**

<sup>13</sup>C NMR (100 MHz, CDCl<sub>3</sub>)

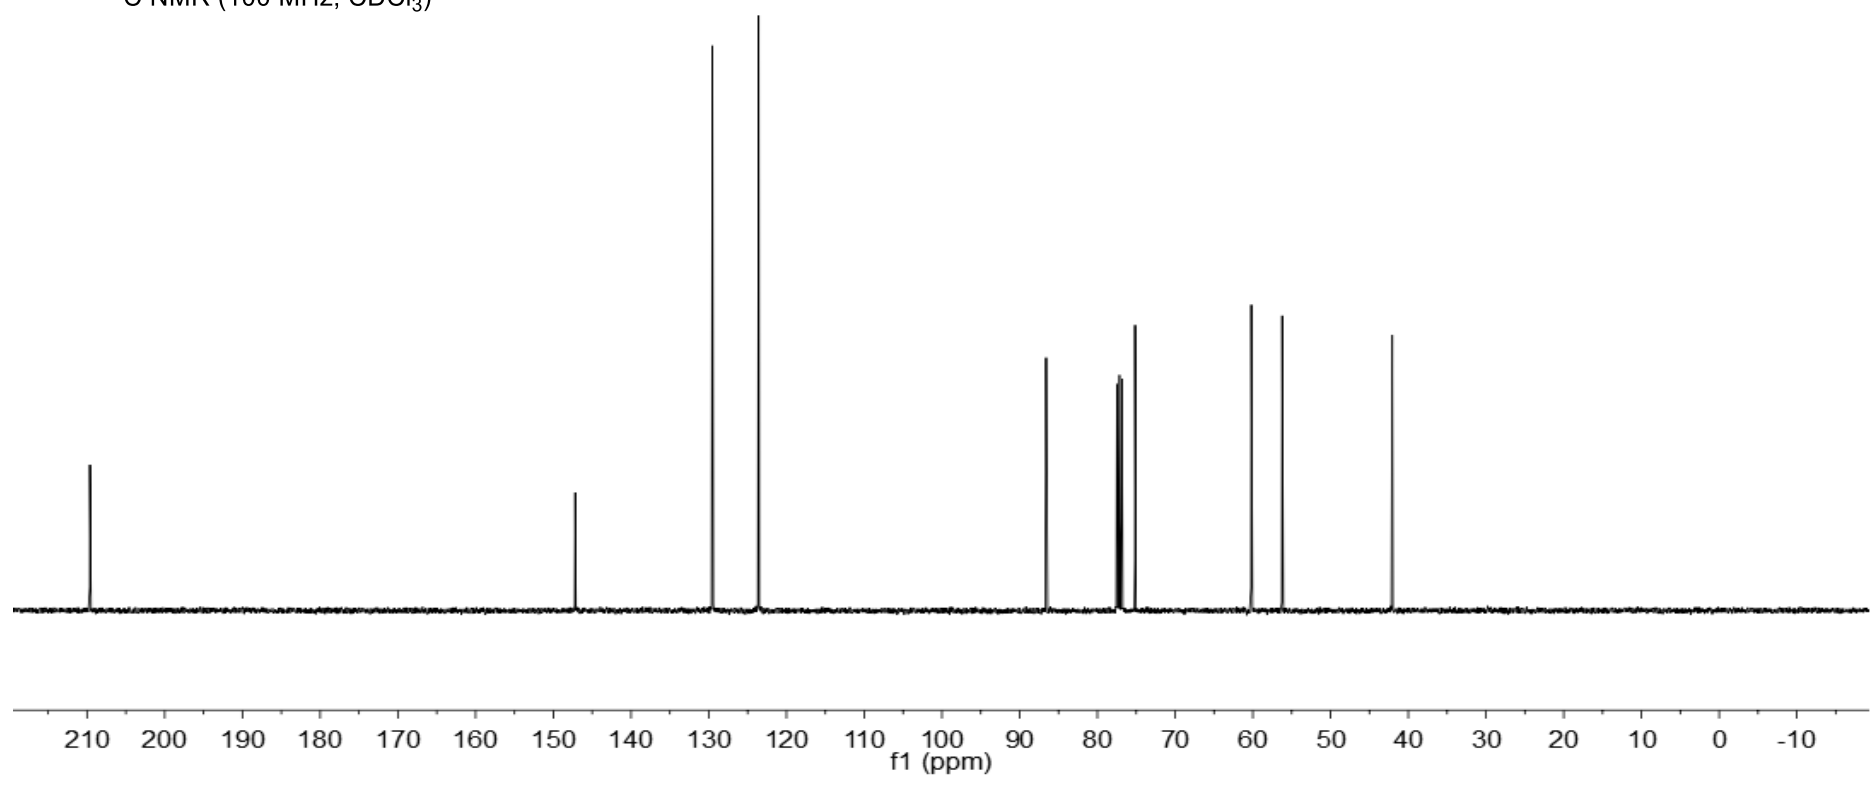

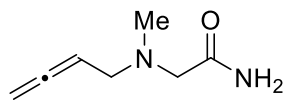

**1e**

$^1\text{H}$  NMR (400 MHz,  $\text{CDCl}_3$ )

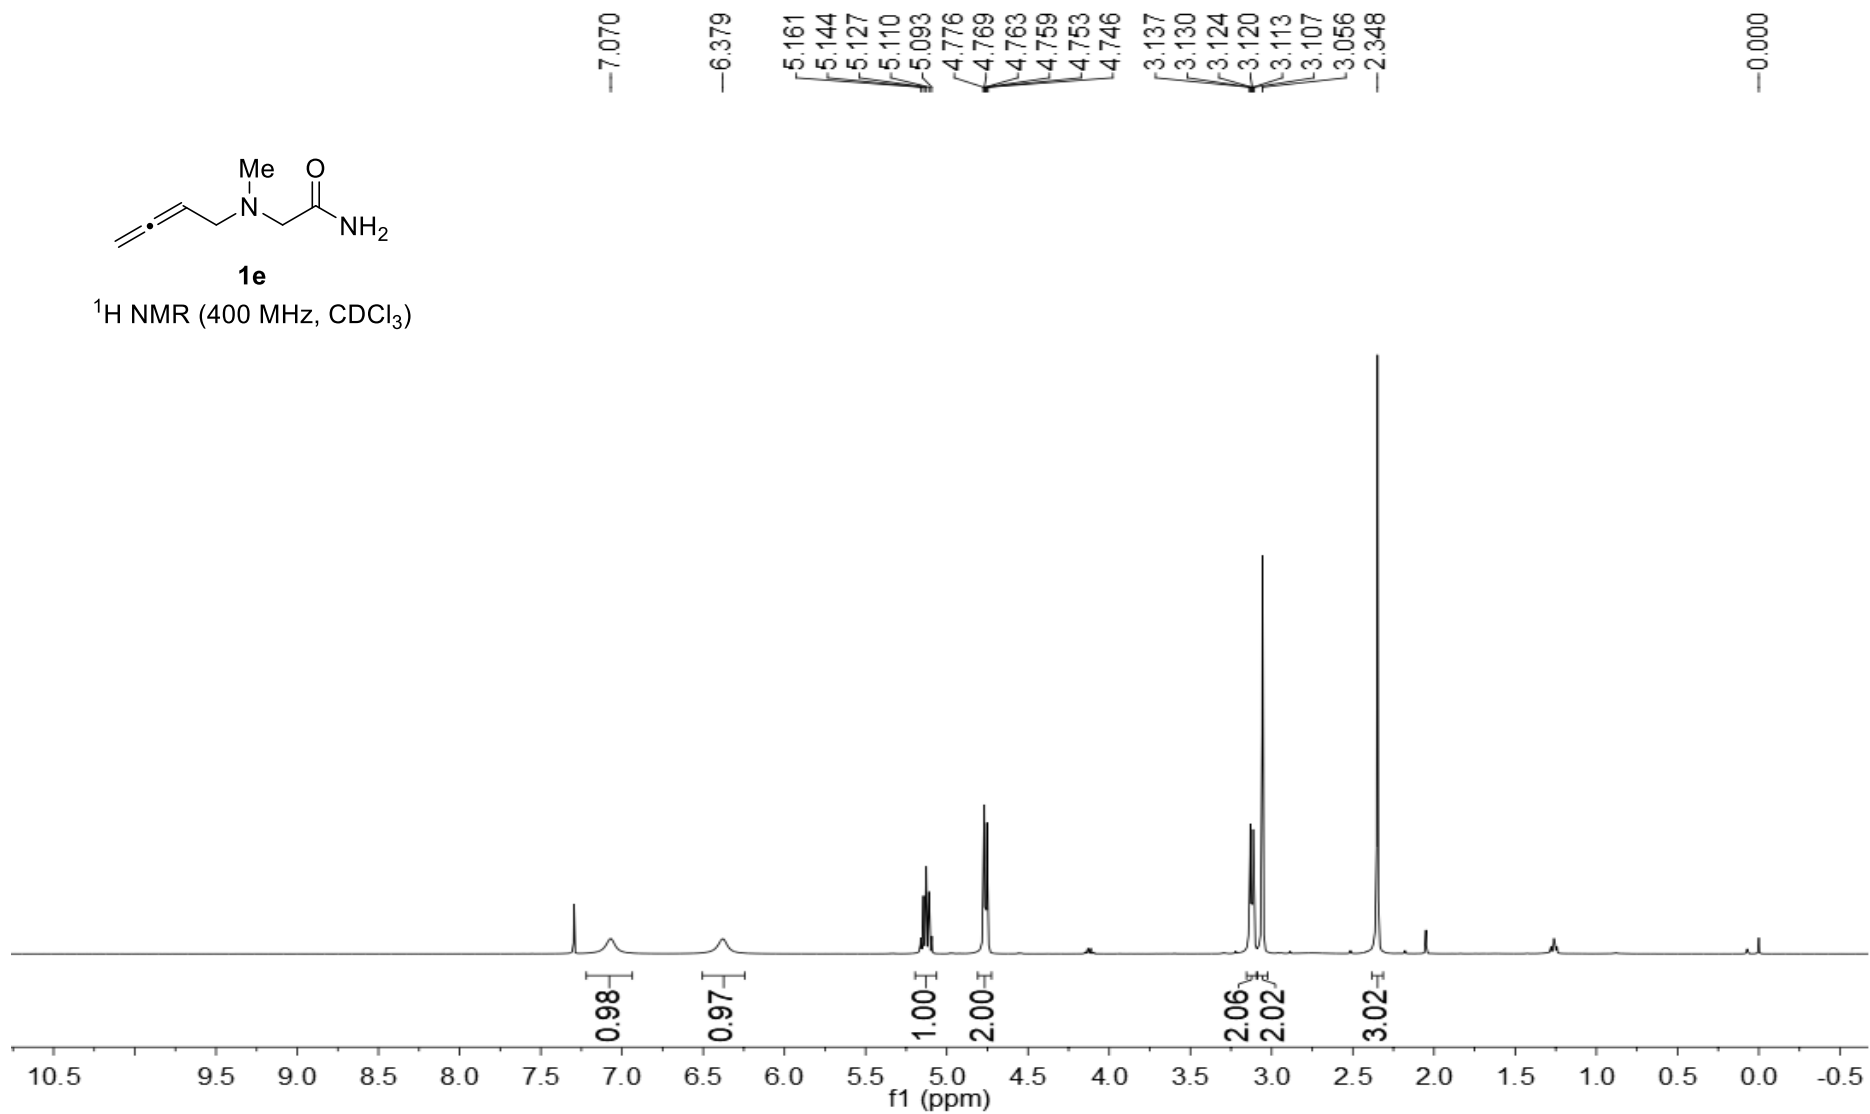

-209.681

-174.499

-86.570

-77.478

-77.160

-76.842

-75.527

-59.892

-56.608

-42.975

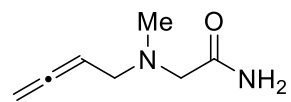

**1e**

<sup>13</sup>C NMR (100 MHz, CDCl<sub>3</sub>)

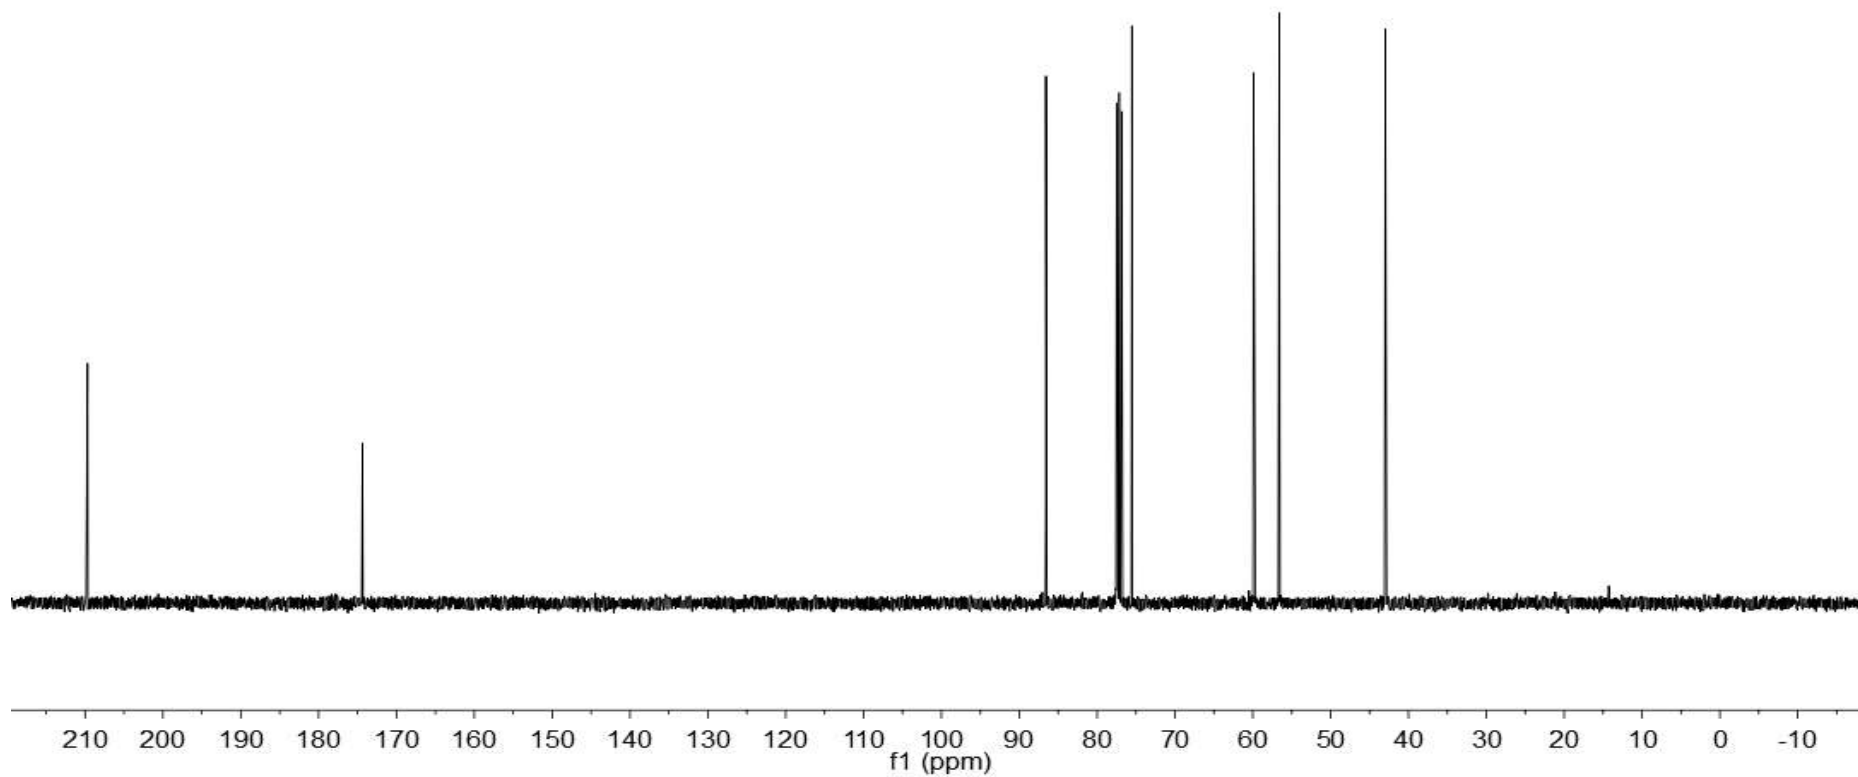

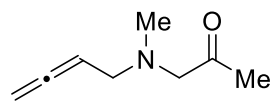

**1f**

<sup>1</sup>H NMR (400 MHz, CDCl<sub>3</sub>)

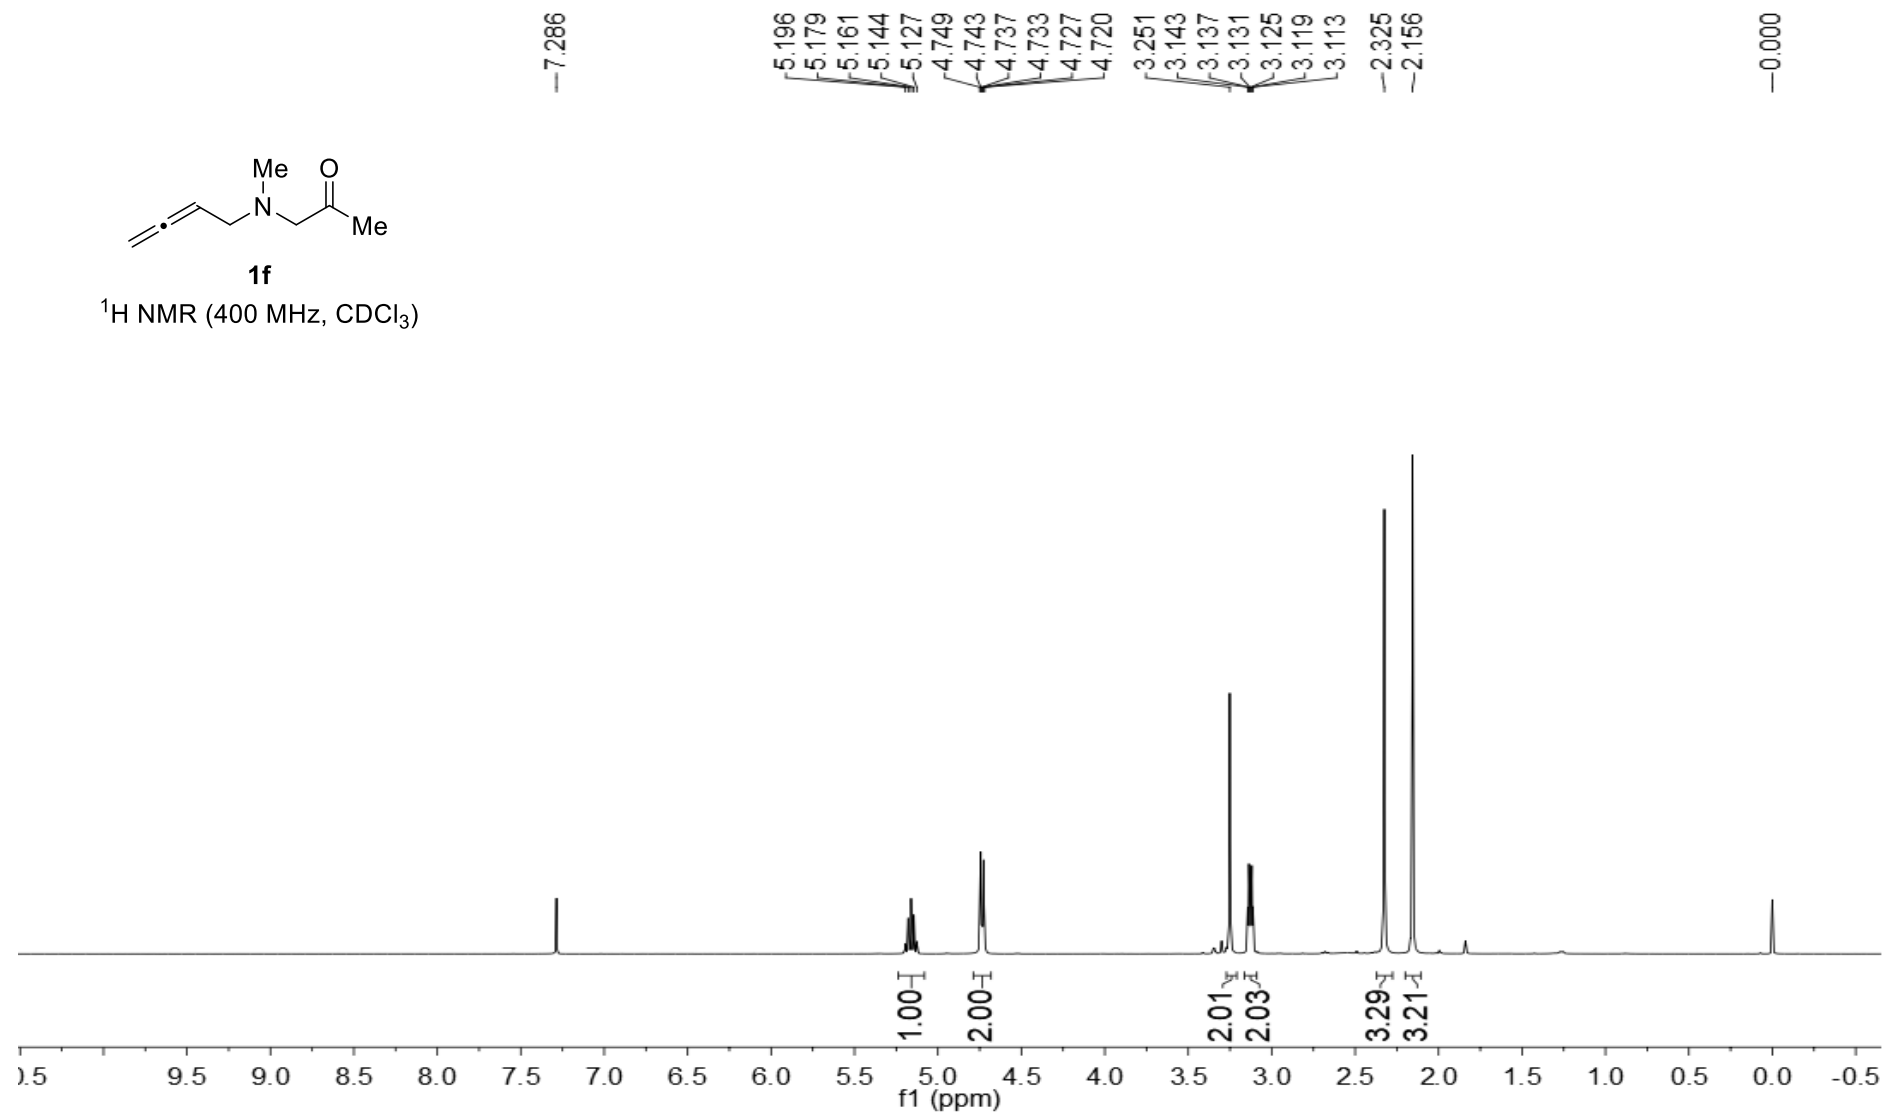

~209.739  
~207.403

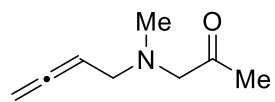

**1f**

<sup>13</sup>C NMR (100 MHz, CDCl<sub>3</sub>)

-86.550  
77.478  
77.160  
76.842  
75.108  
-66.312  
-56.696  
-42.694  
-27.784

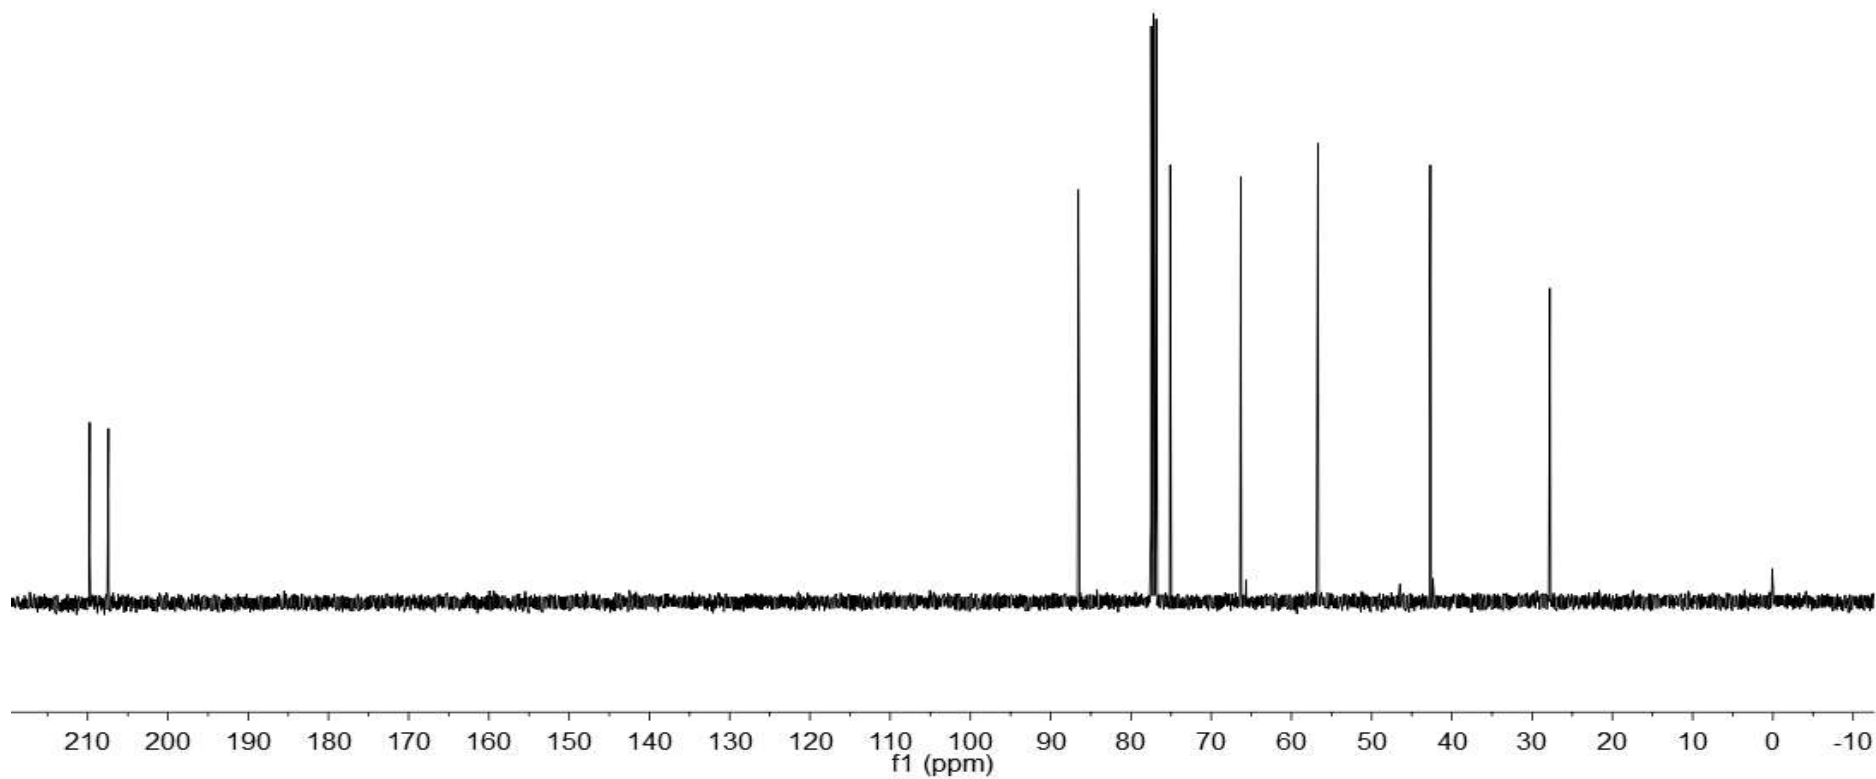

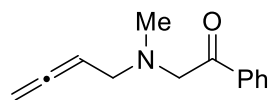

**1g**

<sup>1</sup>H NMR (400 MHz, CDCl<sub>3</sub>)

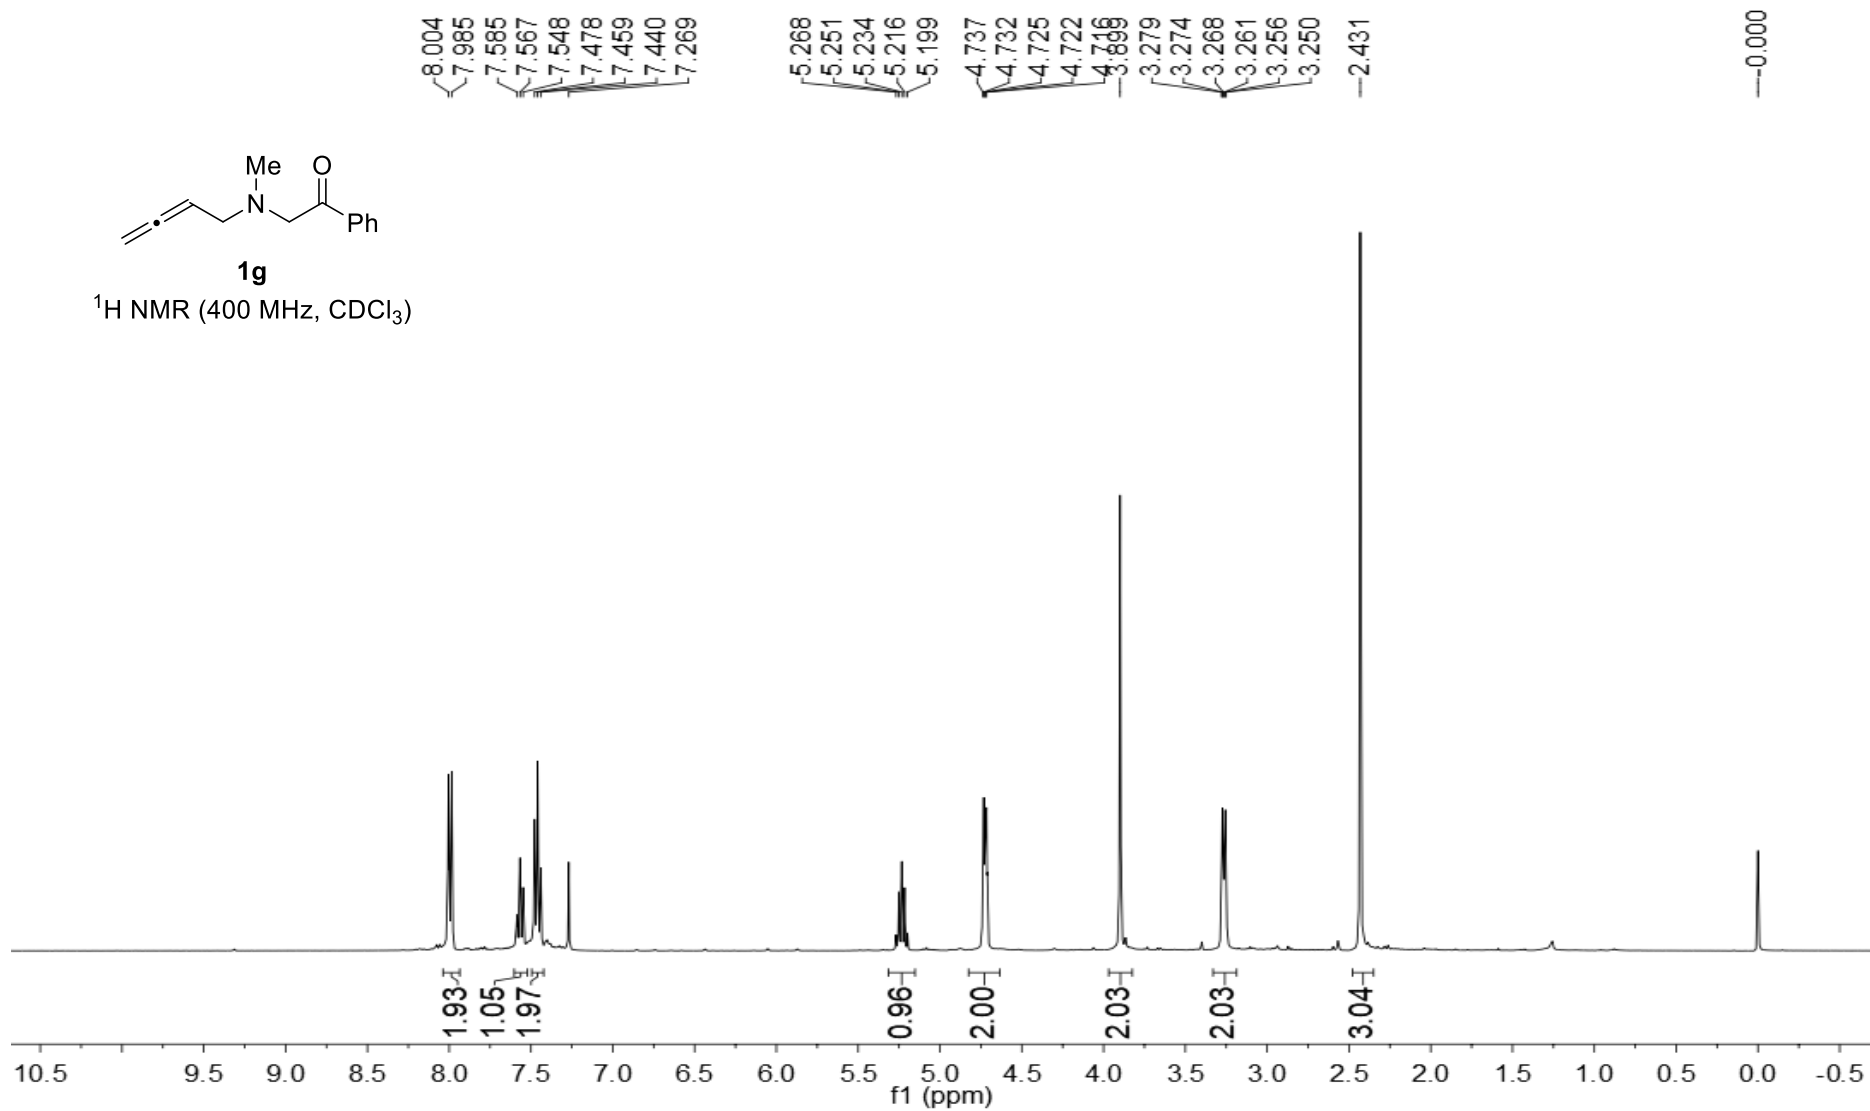

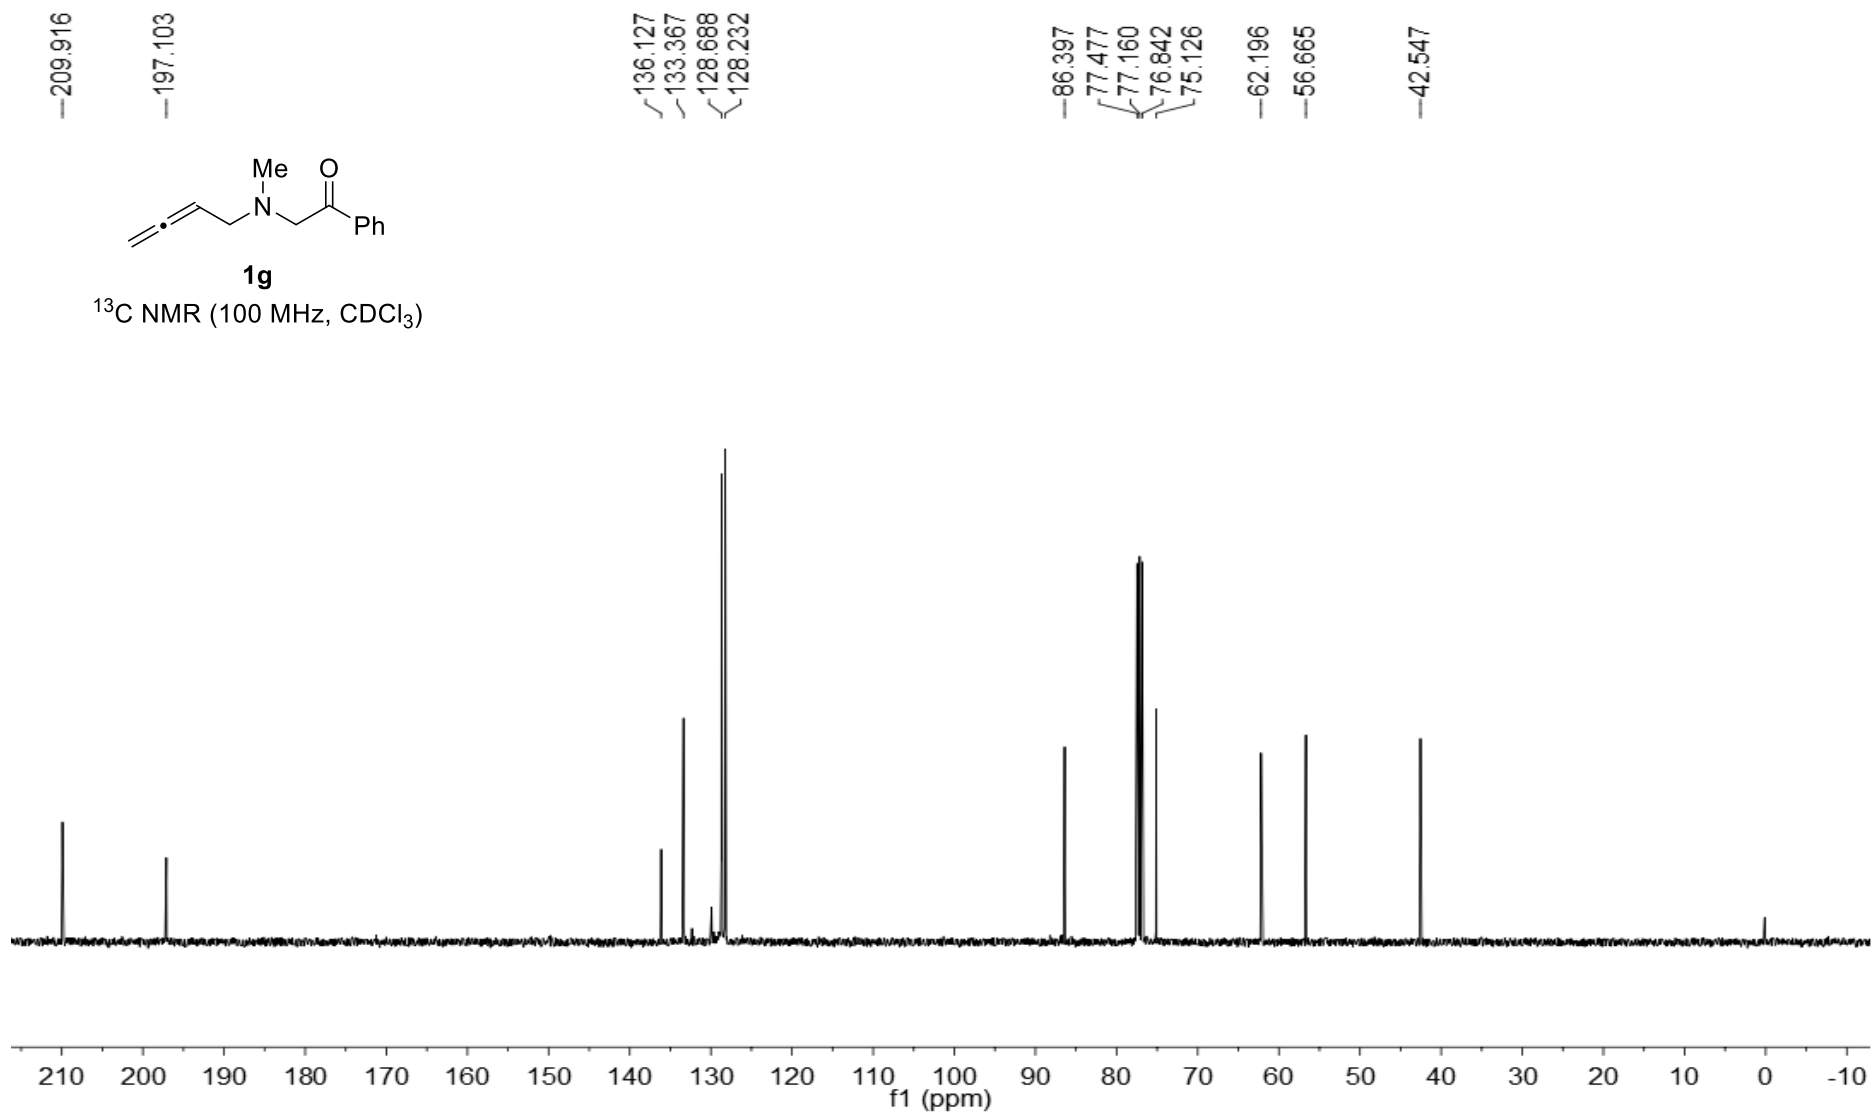



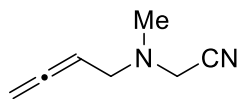

**1h**

<sup>1</sup>H NMR (400 MHz, CDCl<sub>3</sub>)

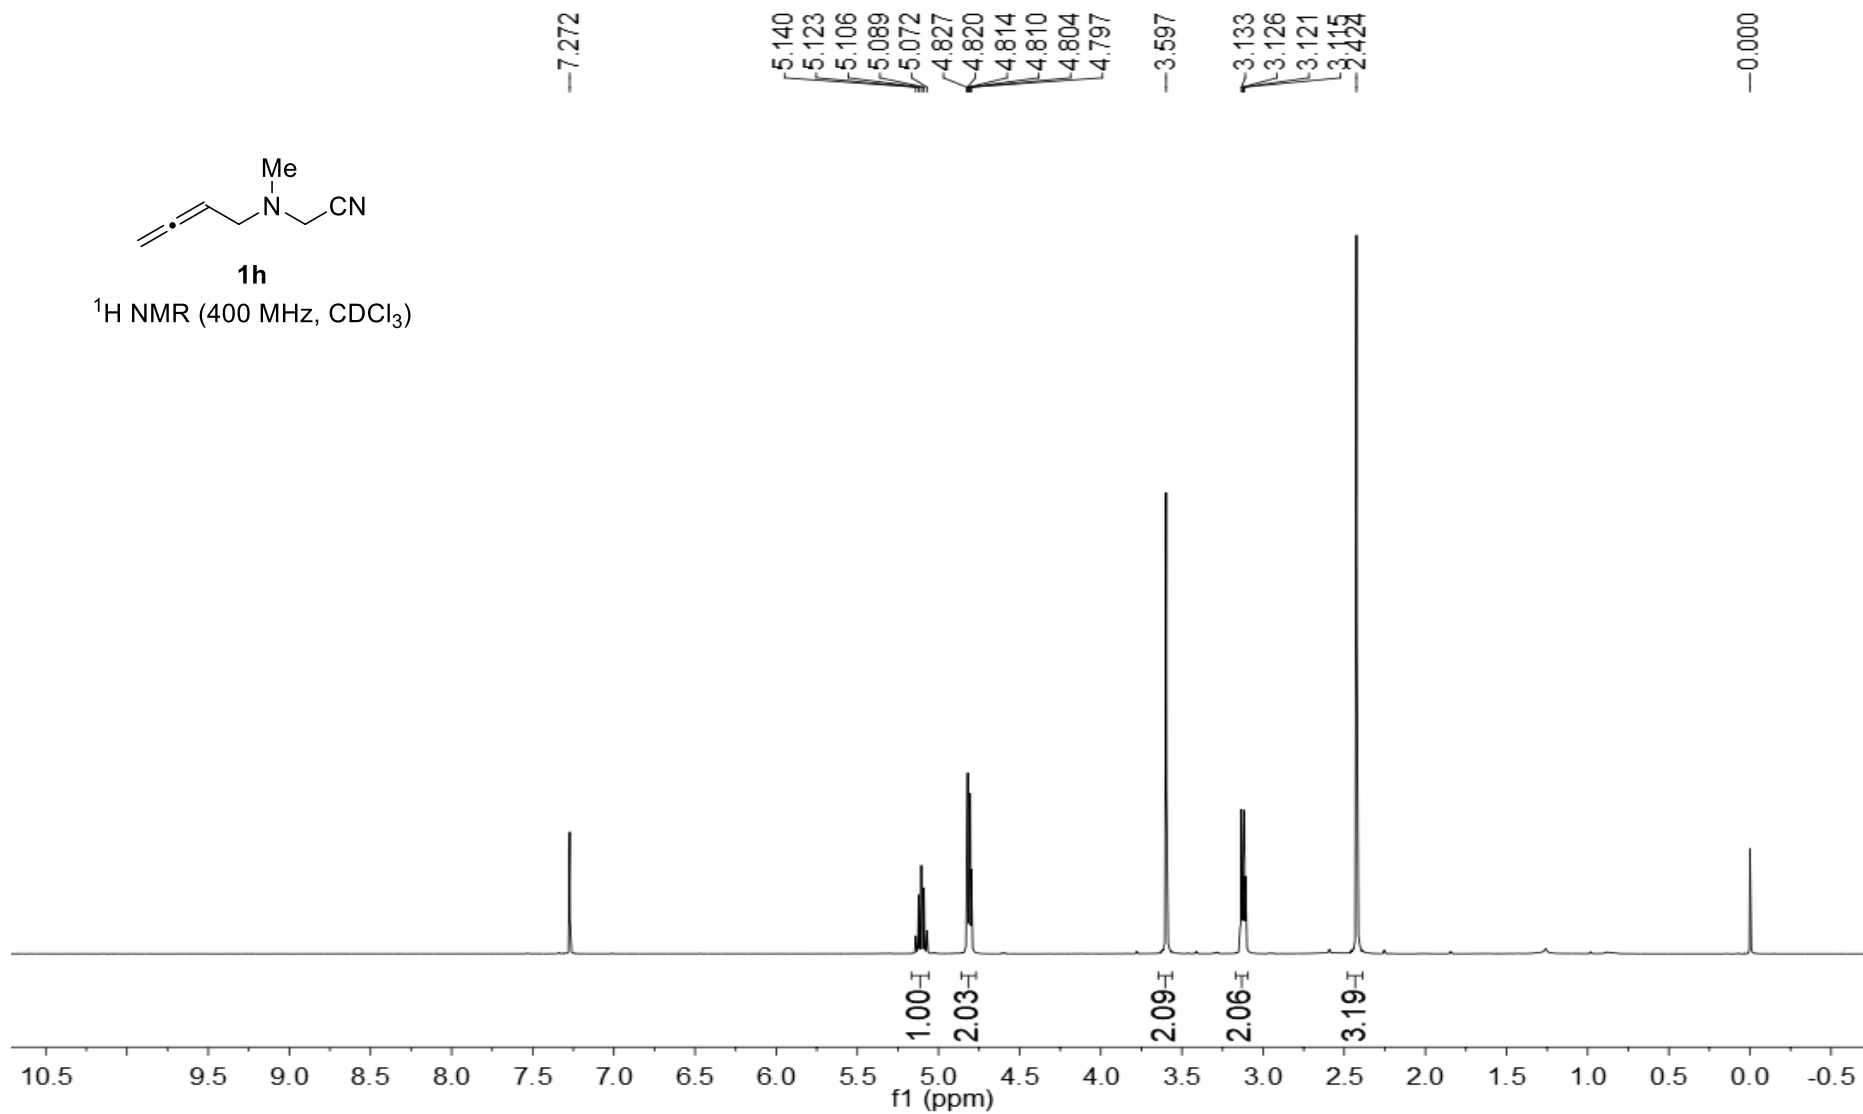

—209.843

—114.643

—86.449

77.478

77.160

76.842

75.965

—54.944

—44.133

—42.008

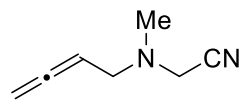

**1h**

<sup>13</sup>C NMR (100 MHz, CDCl<sub>3</sub>)

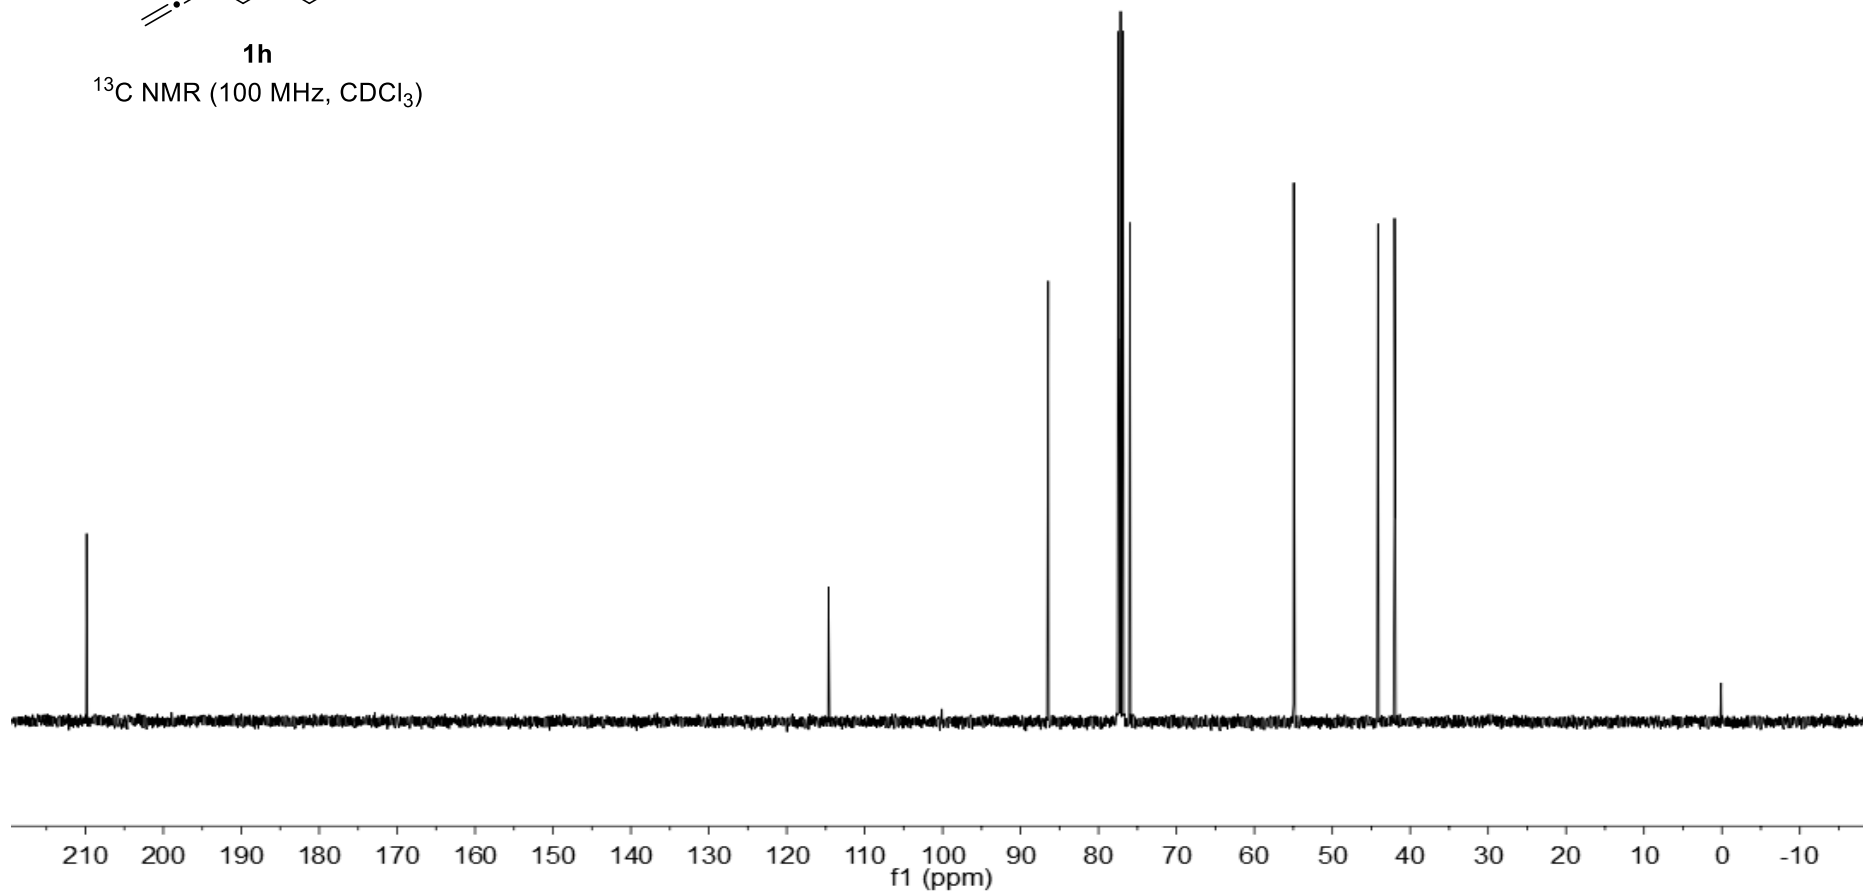

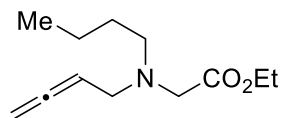

**1i**

<sup>1</sup>H NMR (400 MHz, CDCl<sub>3</sub>)

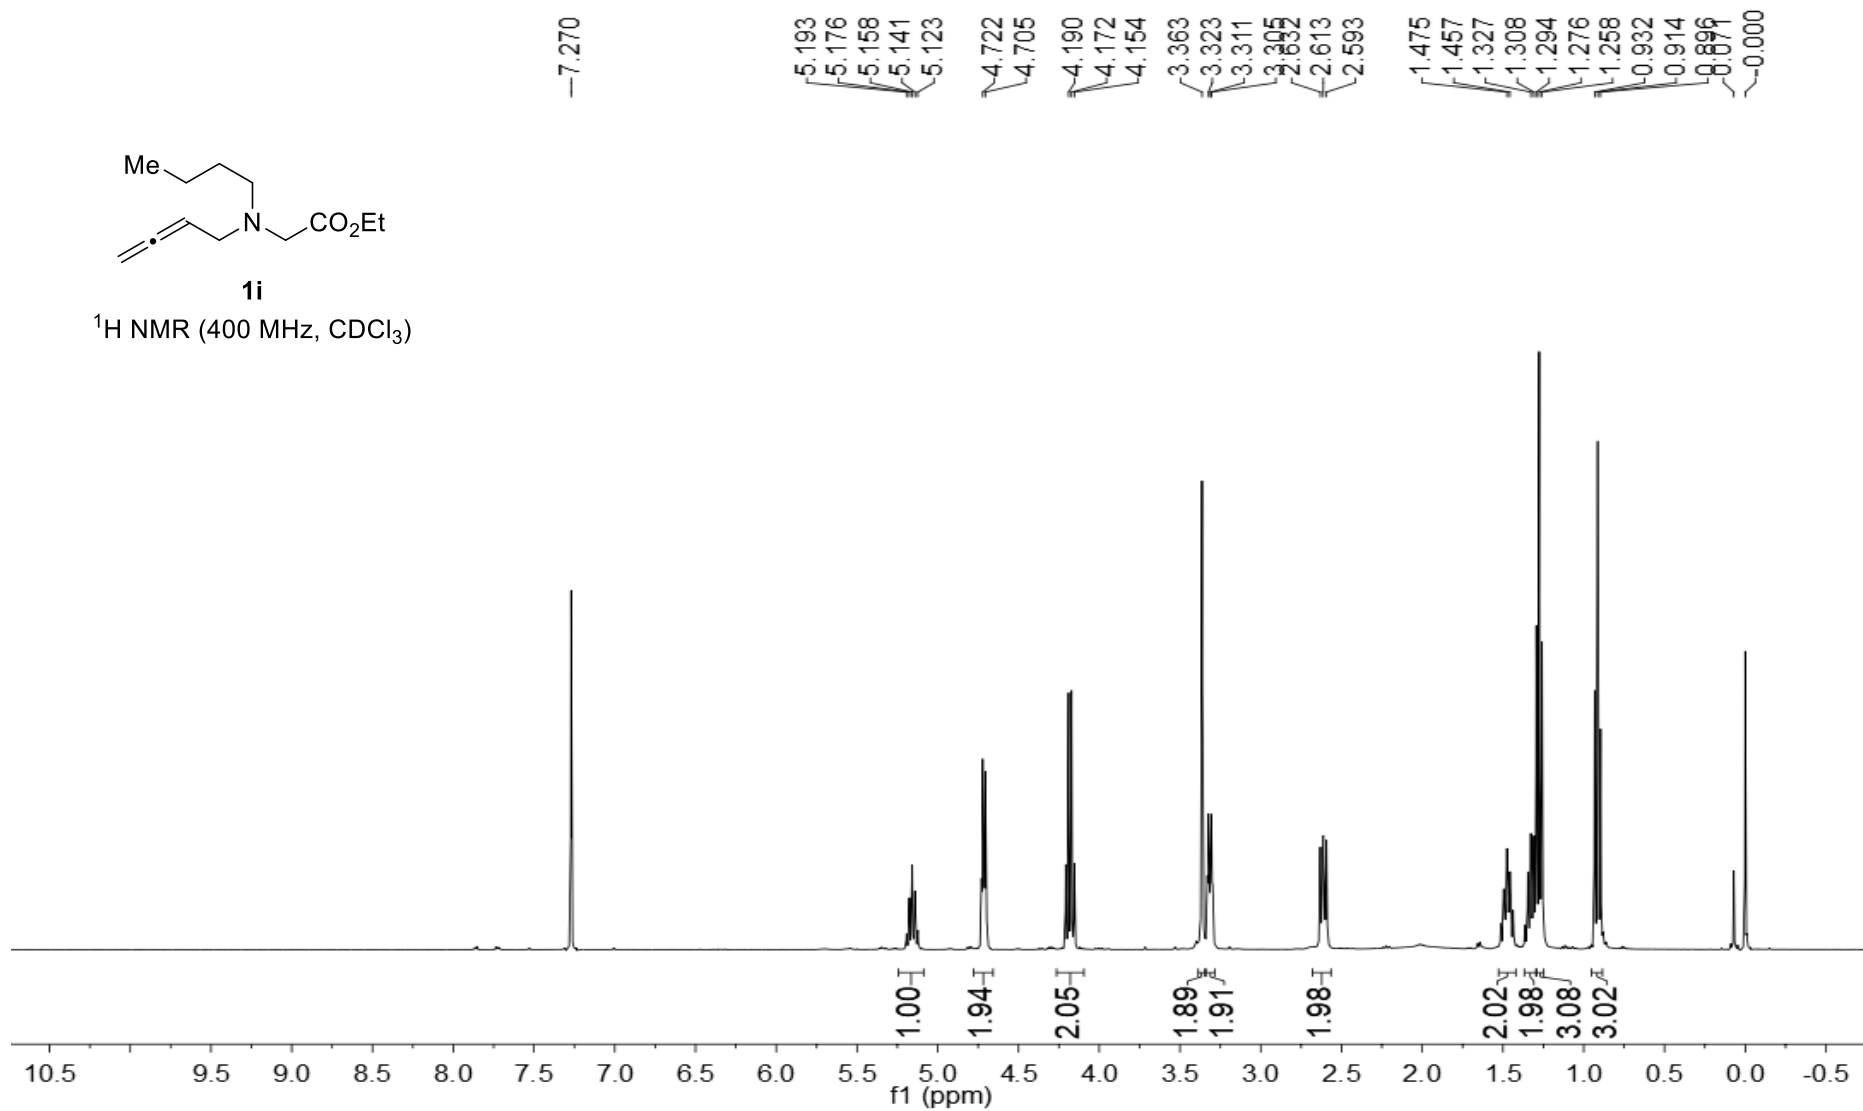

-209.763

-171.424

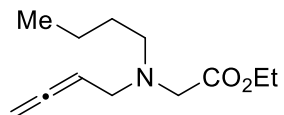

**1i**

<sup>13</sup>C NMR (100 MHz, CDCl<sub>3</sub>)

-86.427

-77.478

-77.160

-76.842

-74.943

-60.612

-54.668

-53.886

-53.443

-29.498

-20.646

-14.413

-14.127

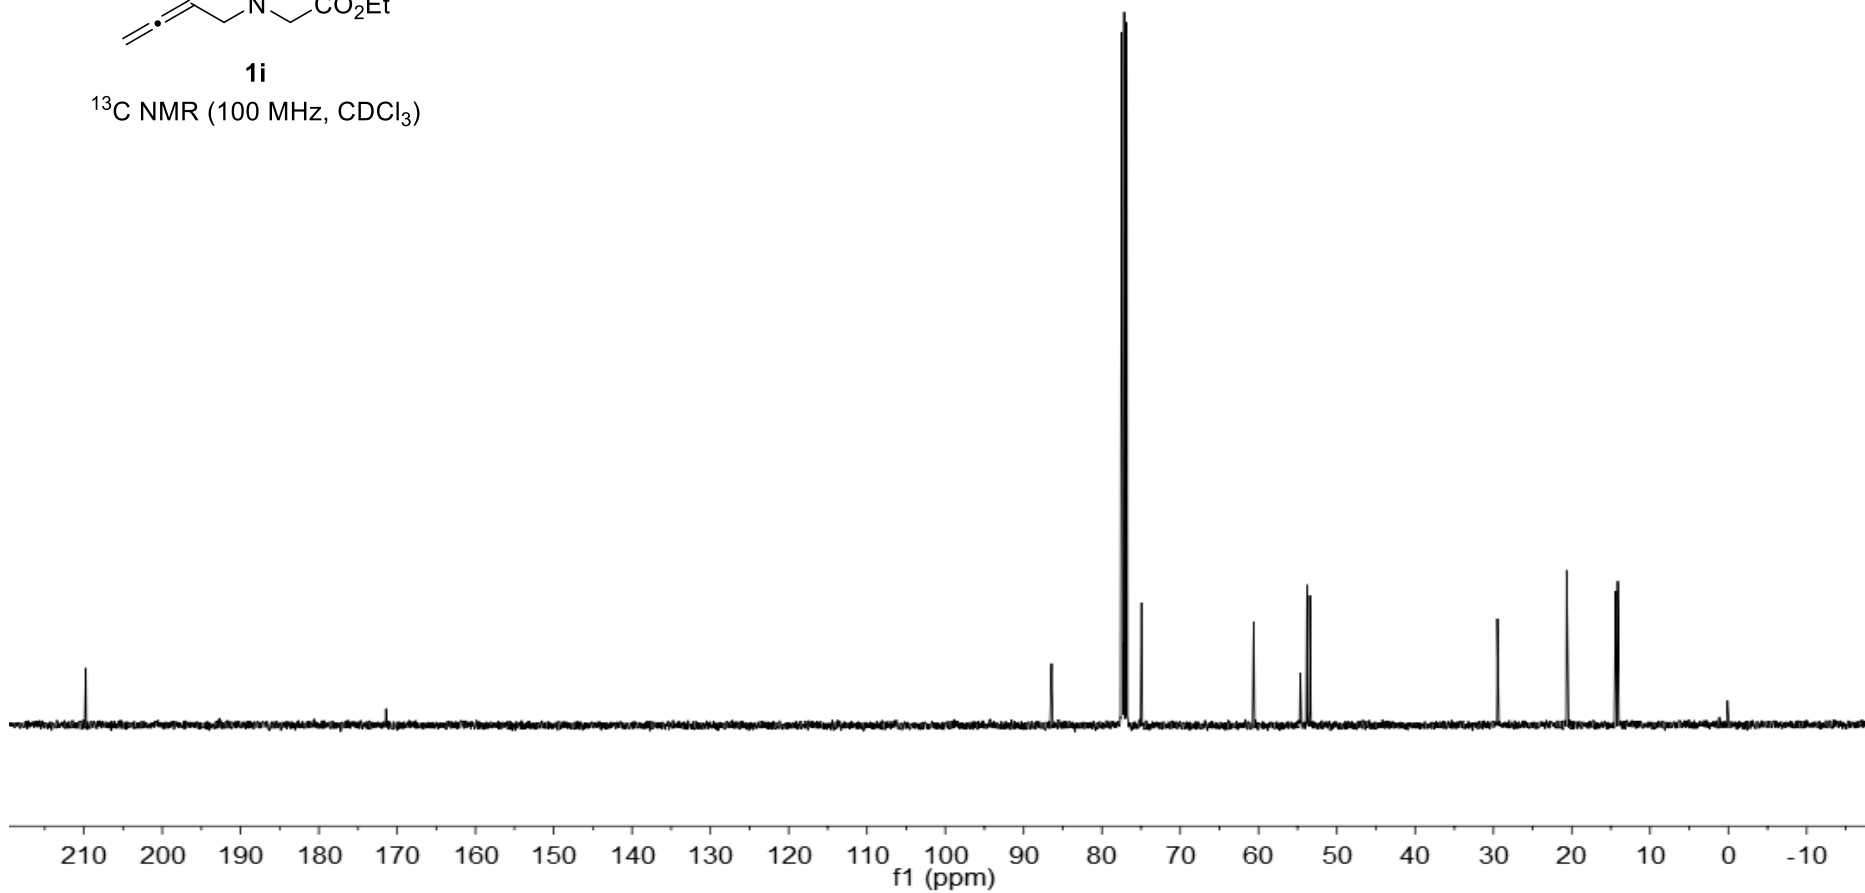

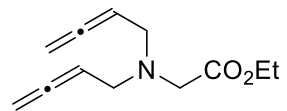

**1j**

<sup>1</sup>H NMR (400 MHz, CDCl<sub>3</sub>)

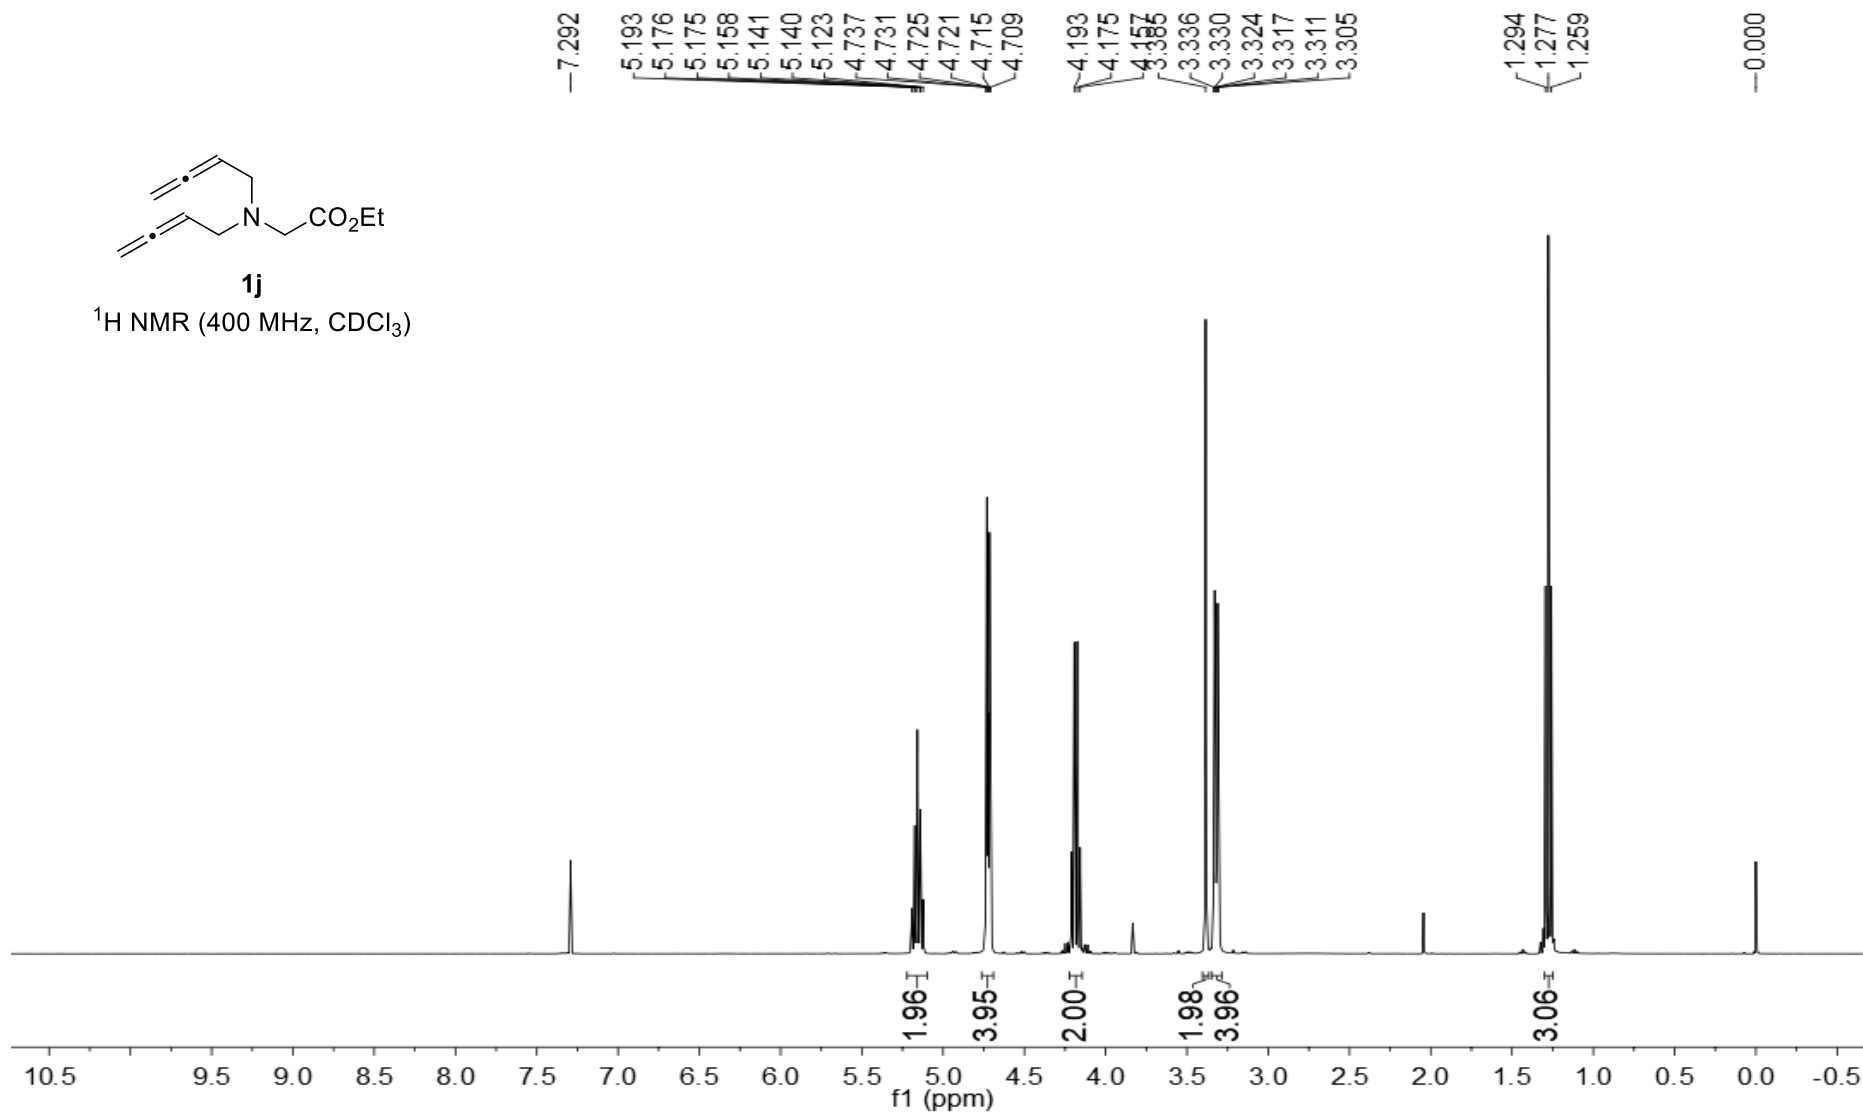

-209.839

-171.126

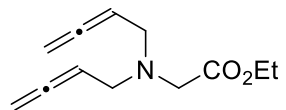

**1j**

<sup>13</sup>C NMR (100 MHz, CDCl<sub>3</sub>)

-86.373

-77.478

-77.160

-76.842

-74.944

-60.729

-54.023

-53.095

-14.419

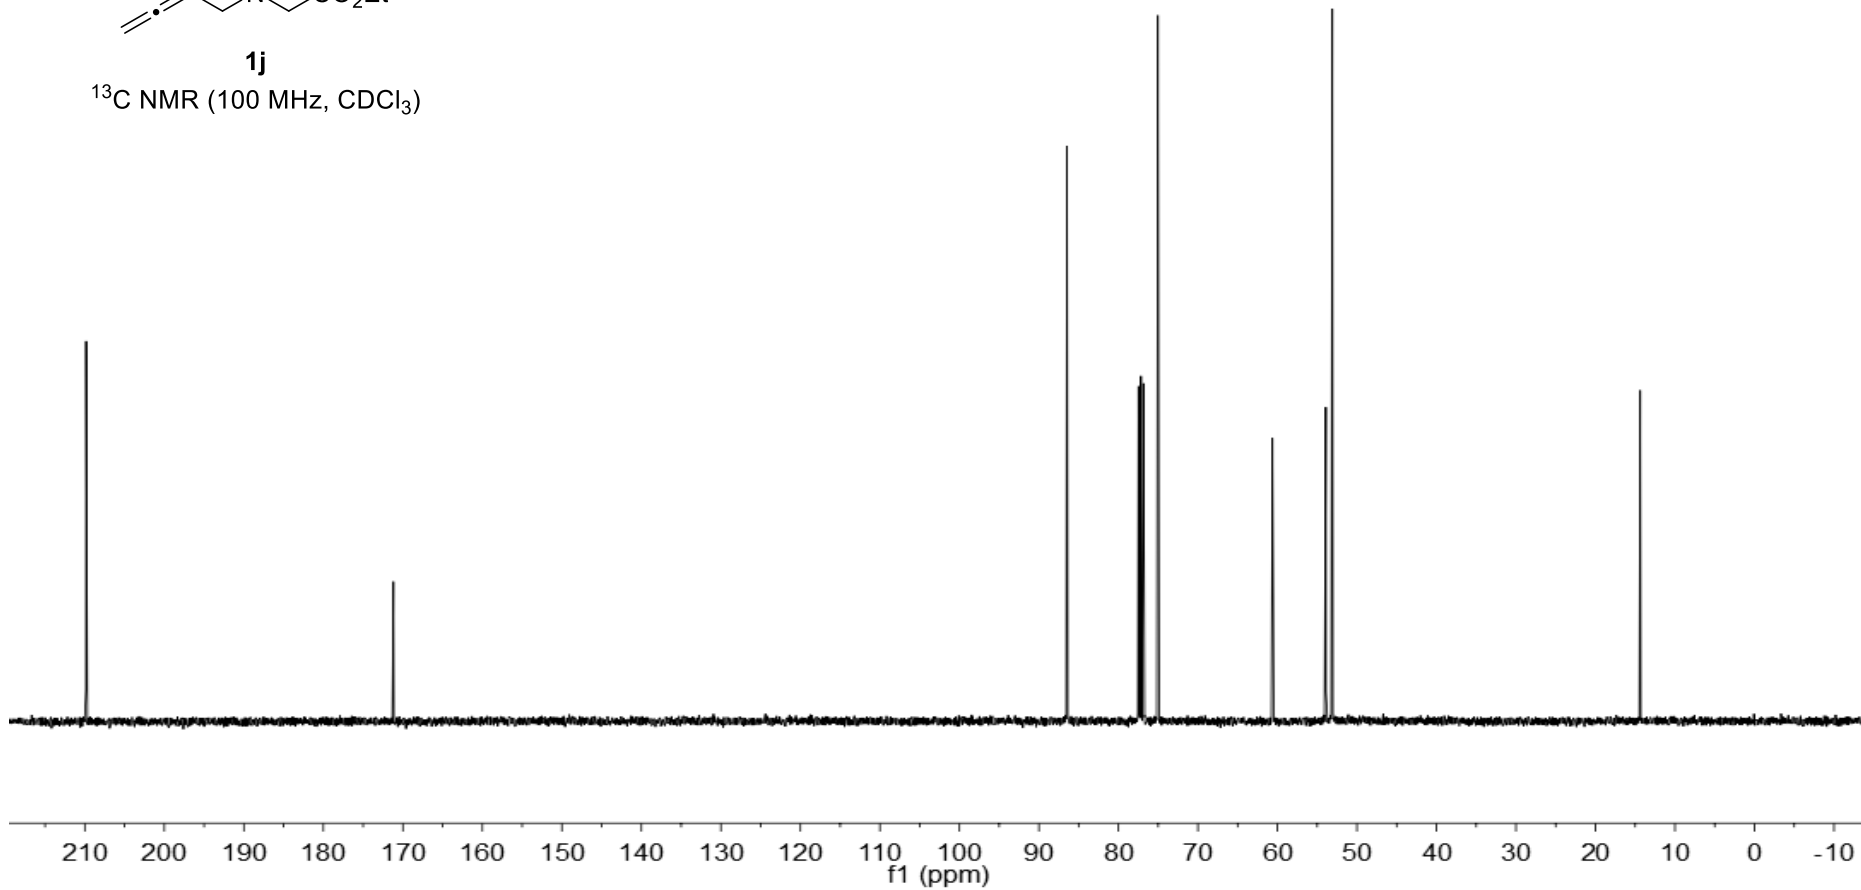

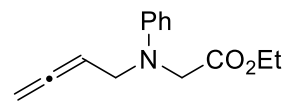

**1k**

<sup>1</sup>H NMR (400 MHz, CDCl<sub>3</sub>)

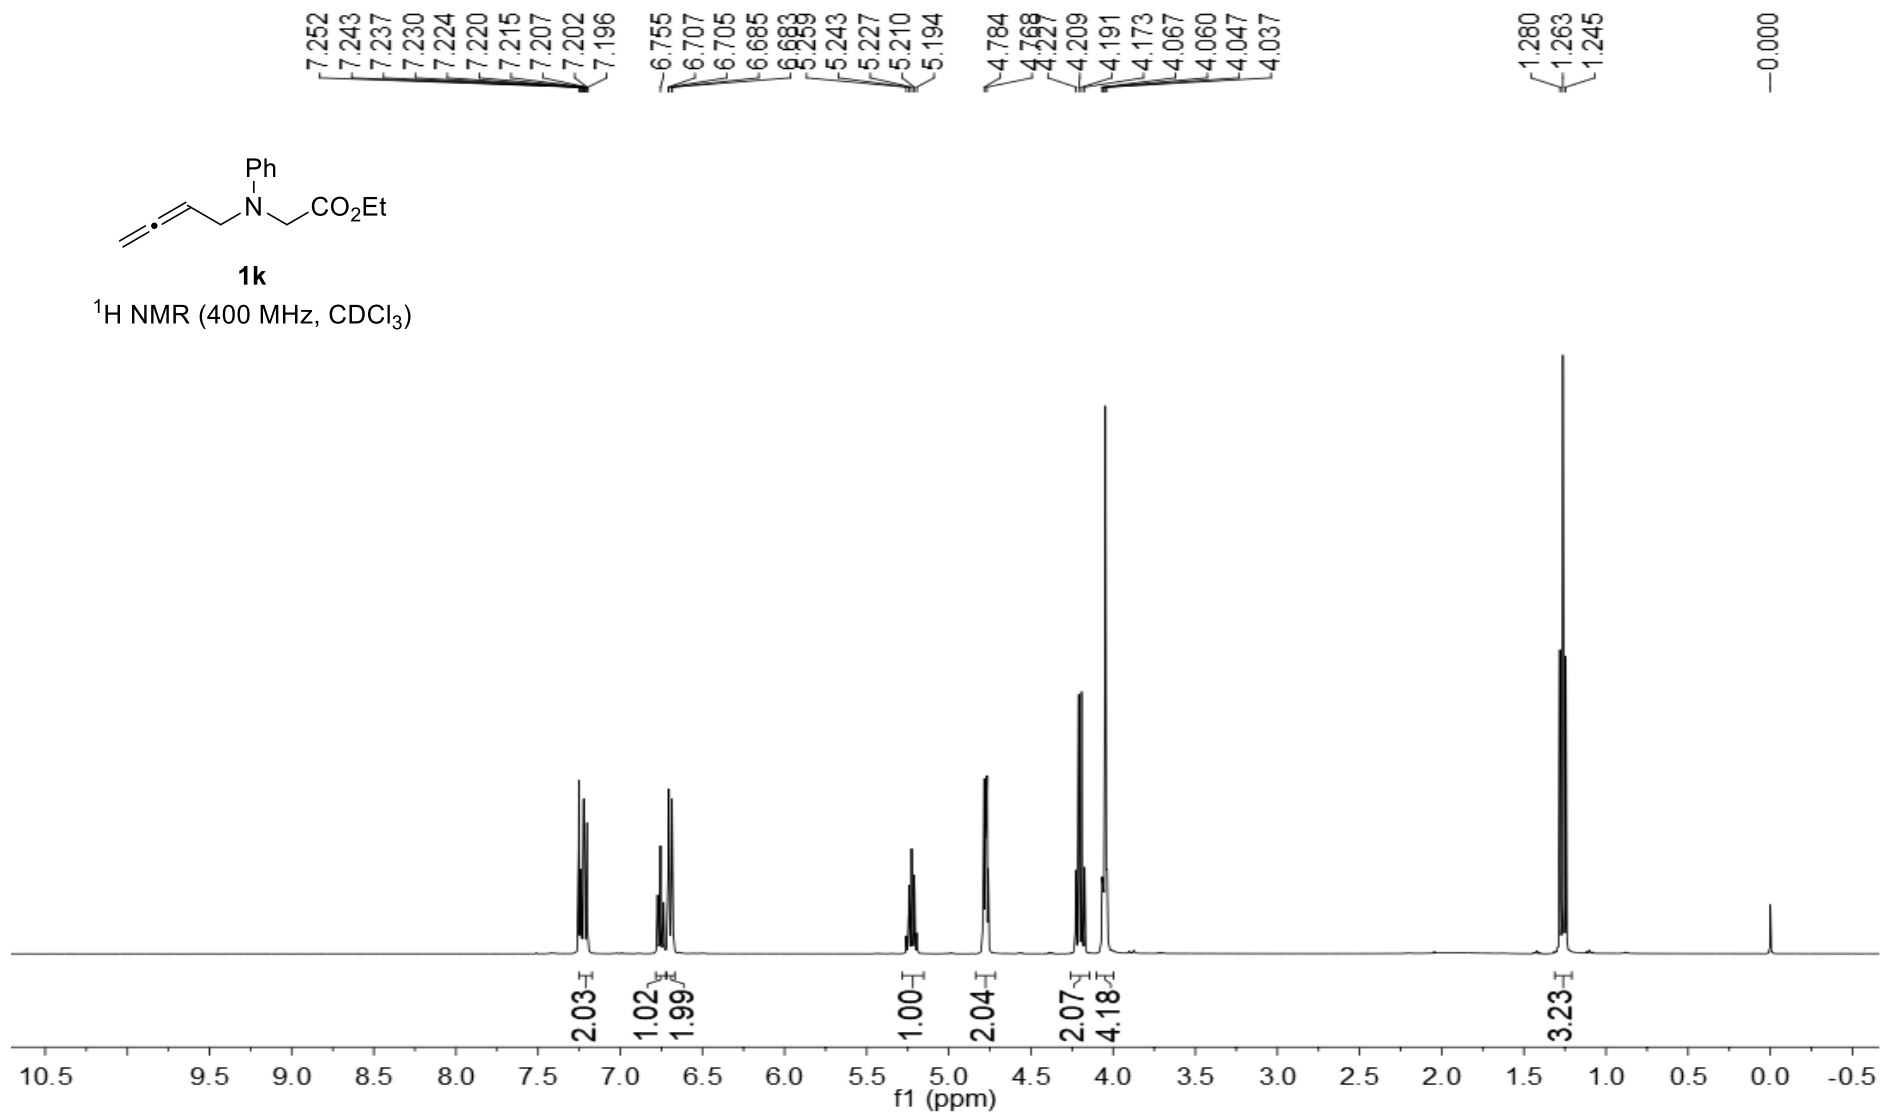

-209.197

-171.271

-147.924

-129.331

-117.799

-112.892

-86.916

-77.477

-77.160

-76.842

-76.418

-61.142

-52.589

-50.741

-14.358

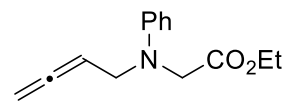

**1k**

<sup>13</sup>C NMR (100 MHz, CDCl<sub>3</sub>)

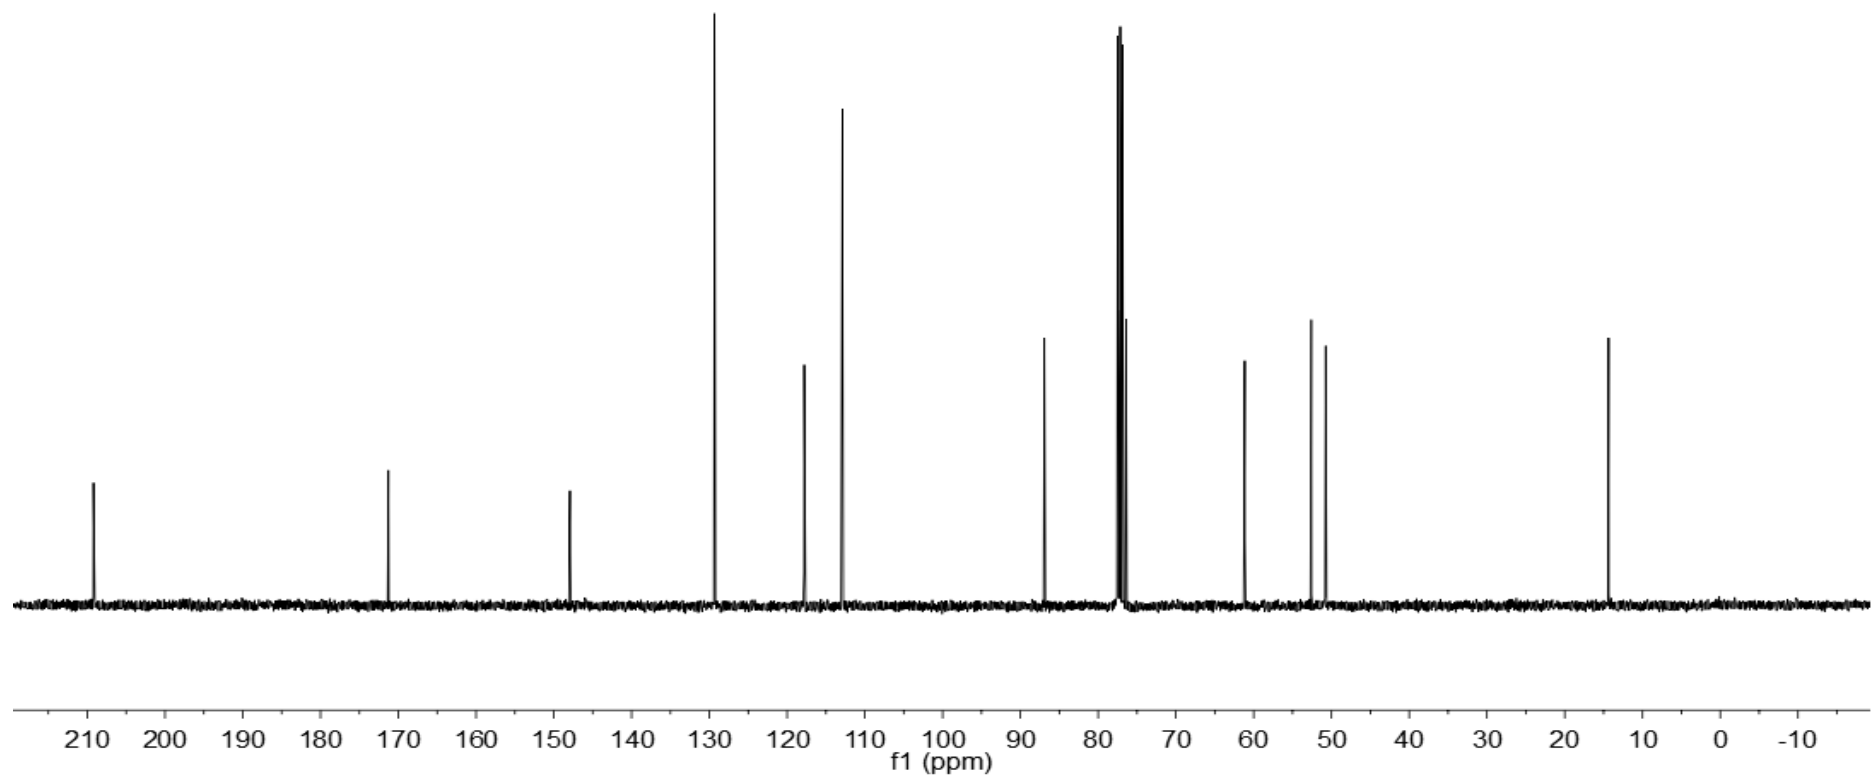



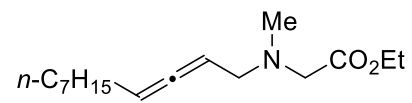

**11**

<sup>1</sup>H NMR (400 MHz, CDCl<sub>3</sub>)

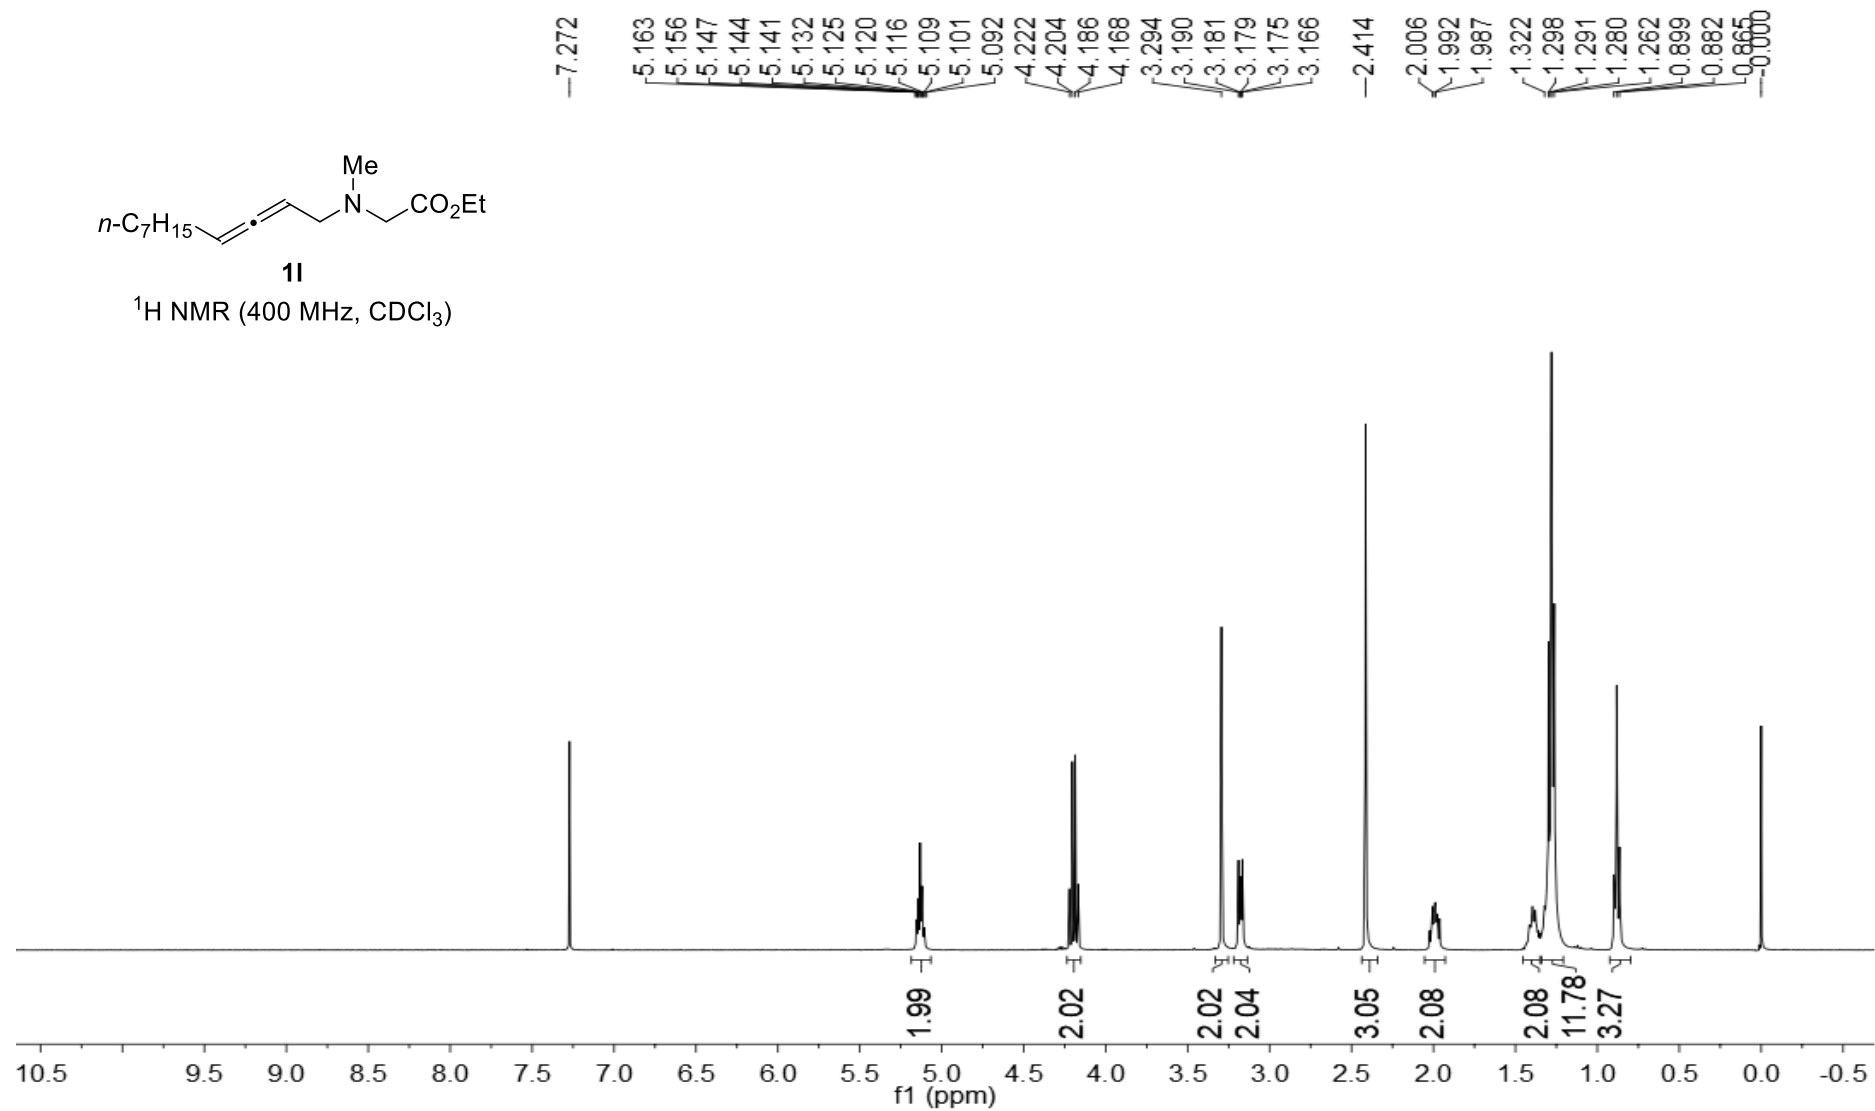

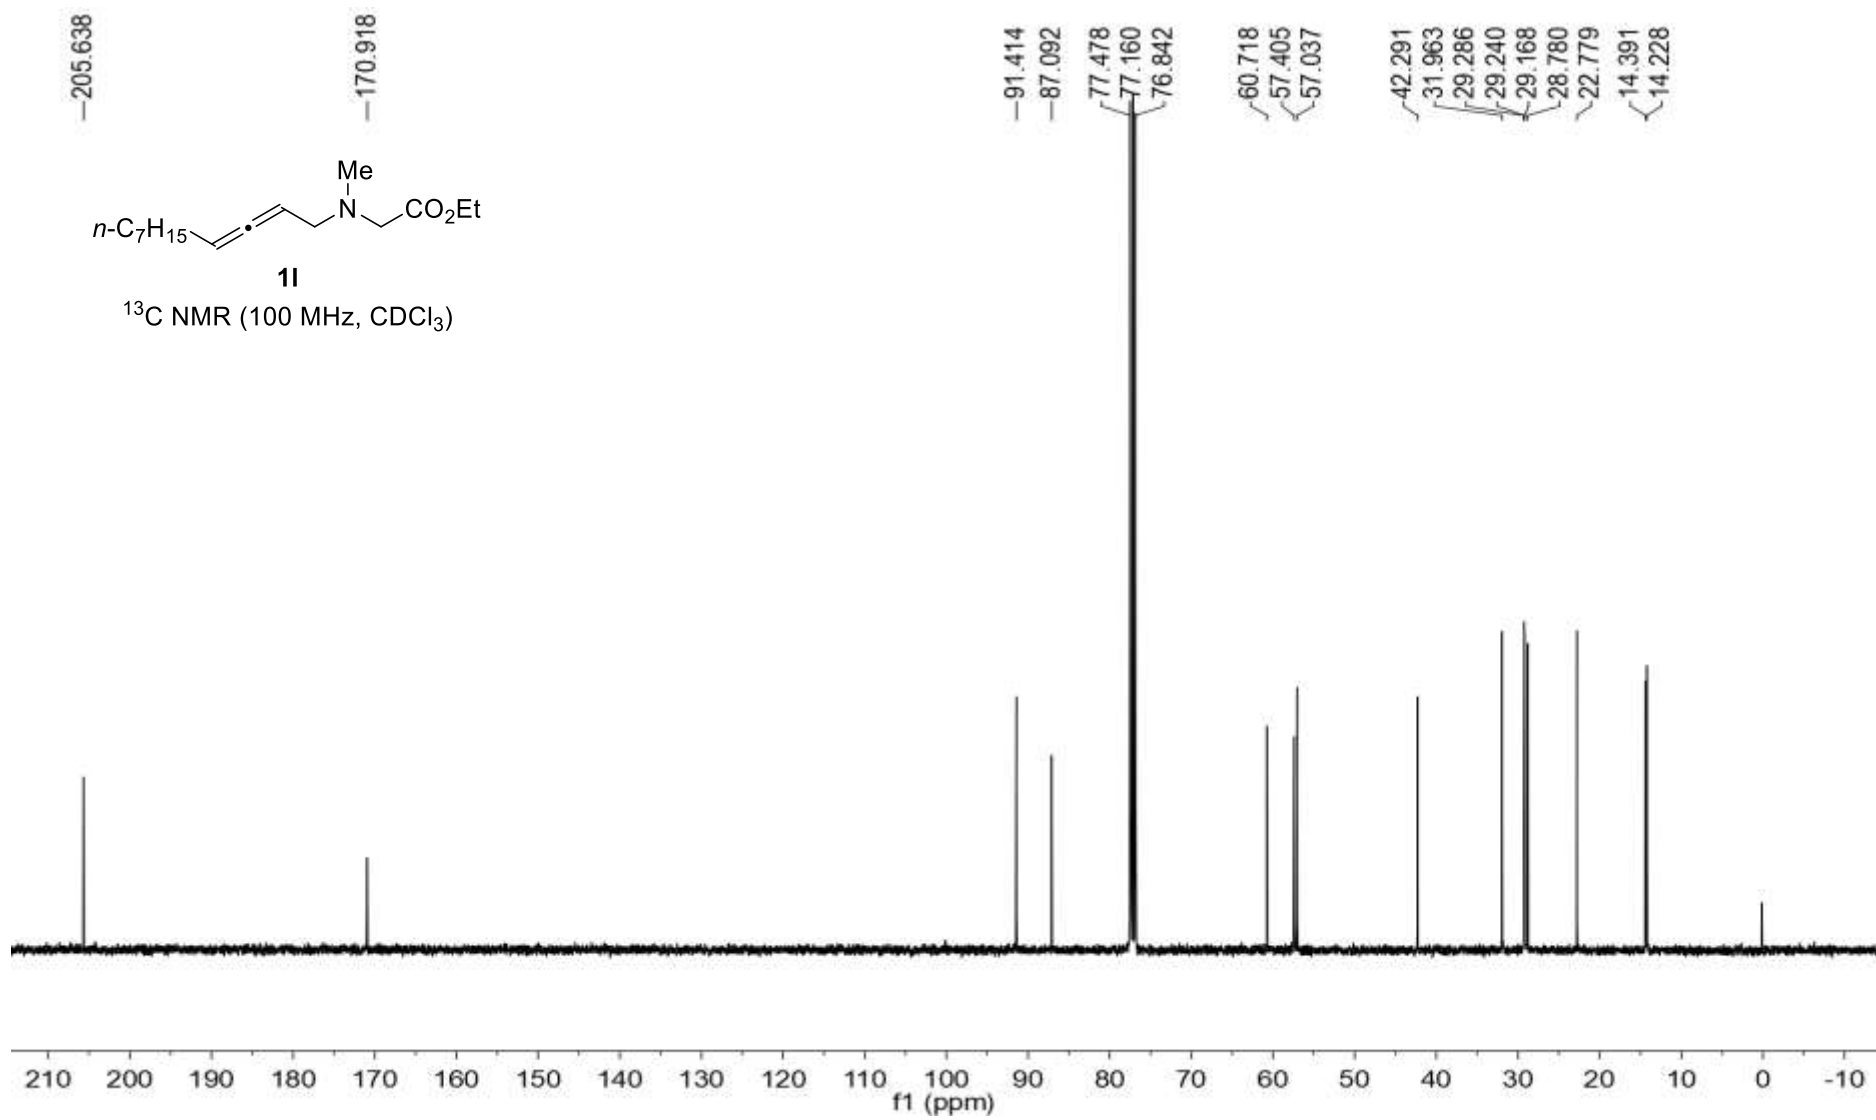

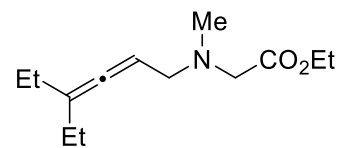

**1m**

<sup>1</sup>H NMR (400 MHz, CDCl<sub>3</sub>)

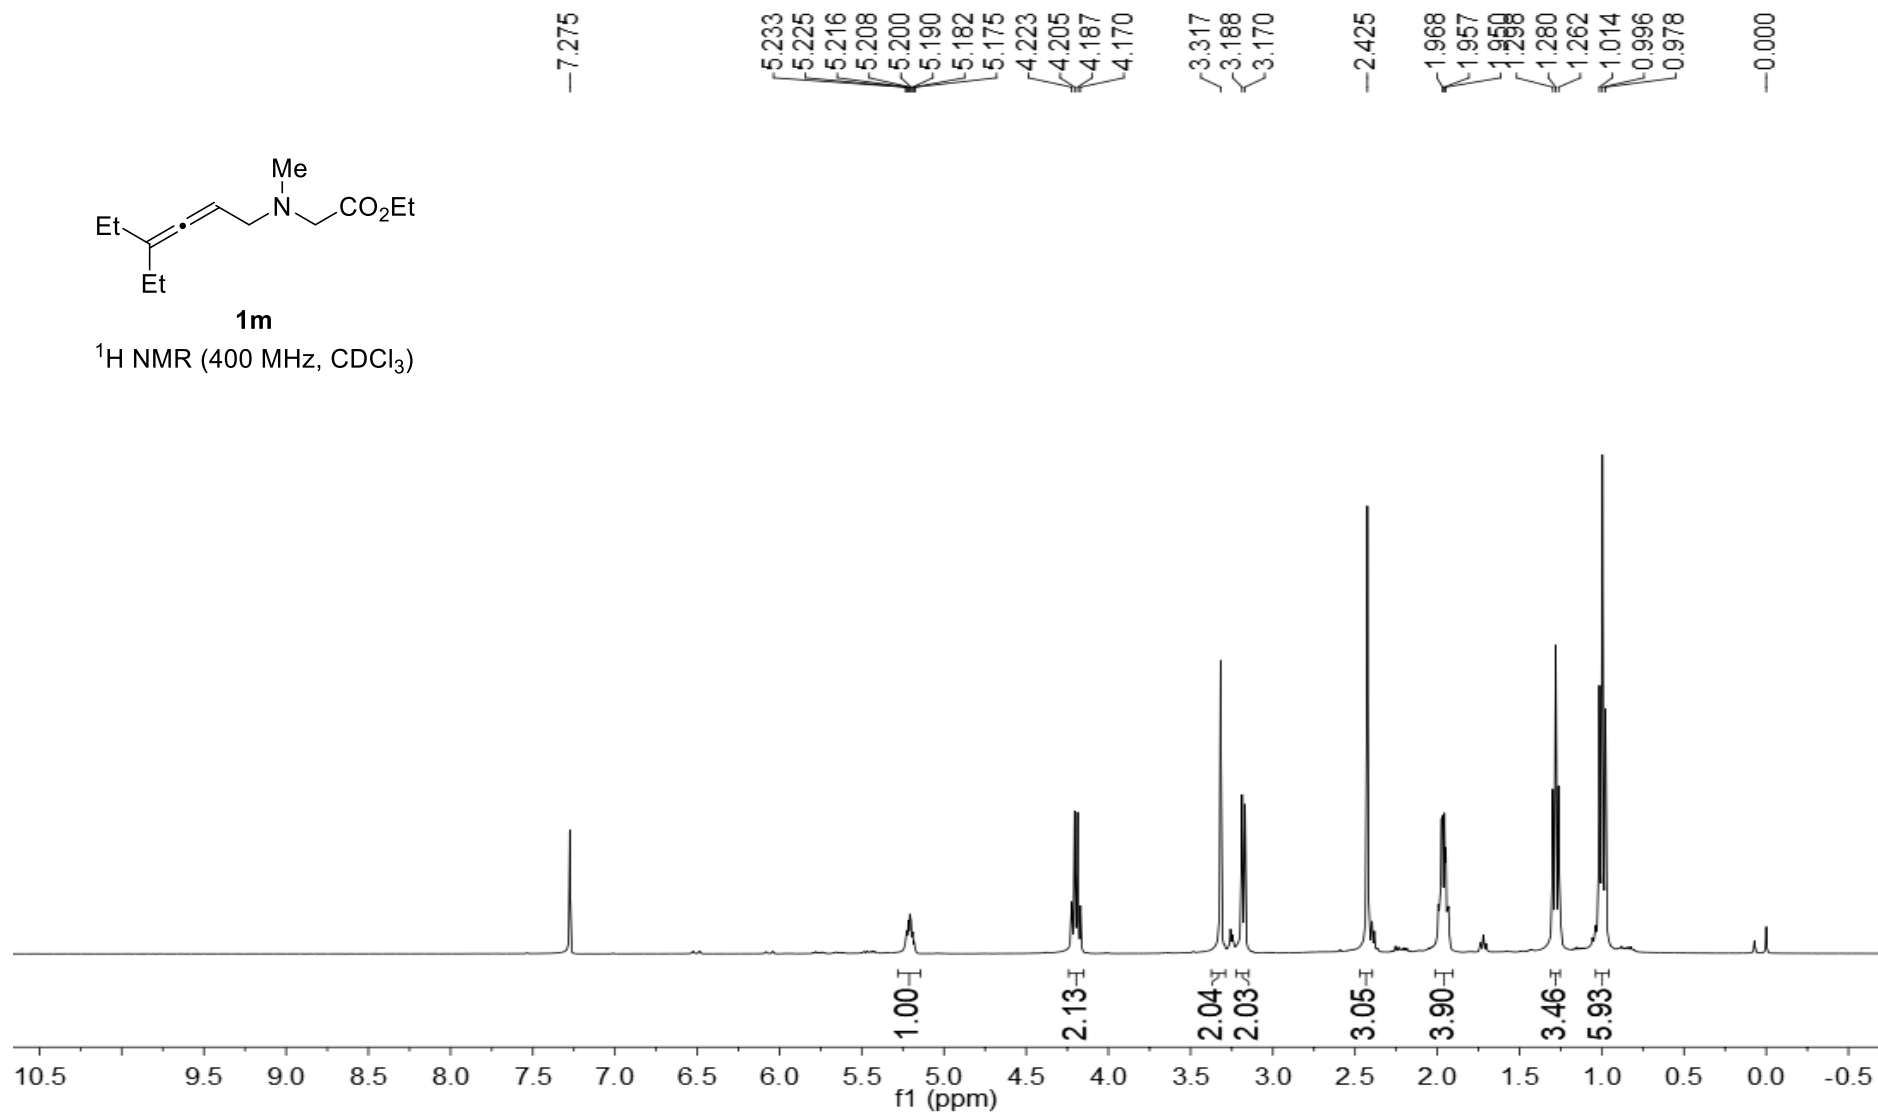

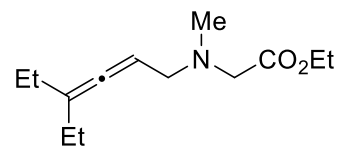

**1m**

<sup>13</sup>C NMR (100 MHz, CDCl<sub>3</sub>)

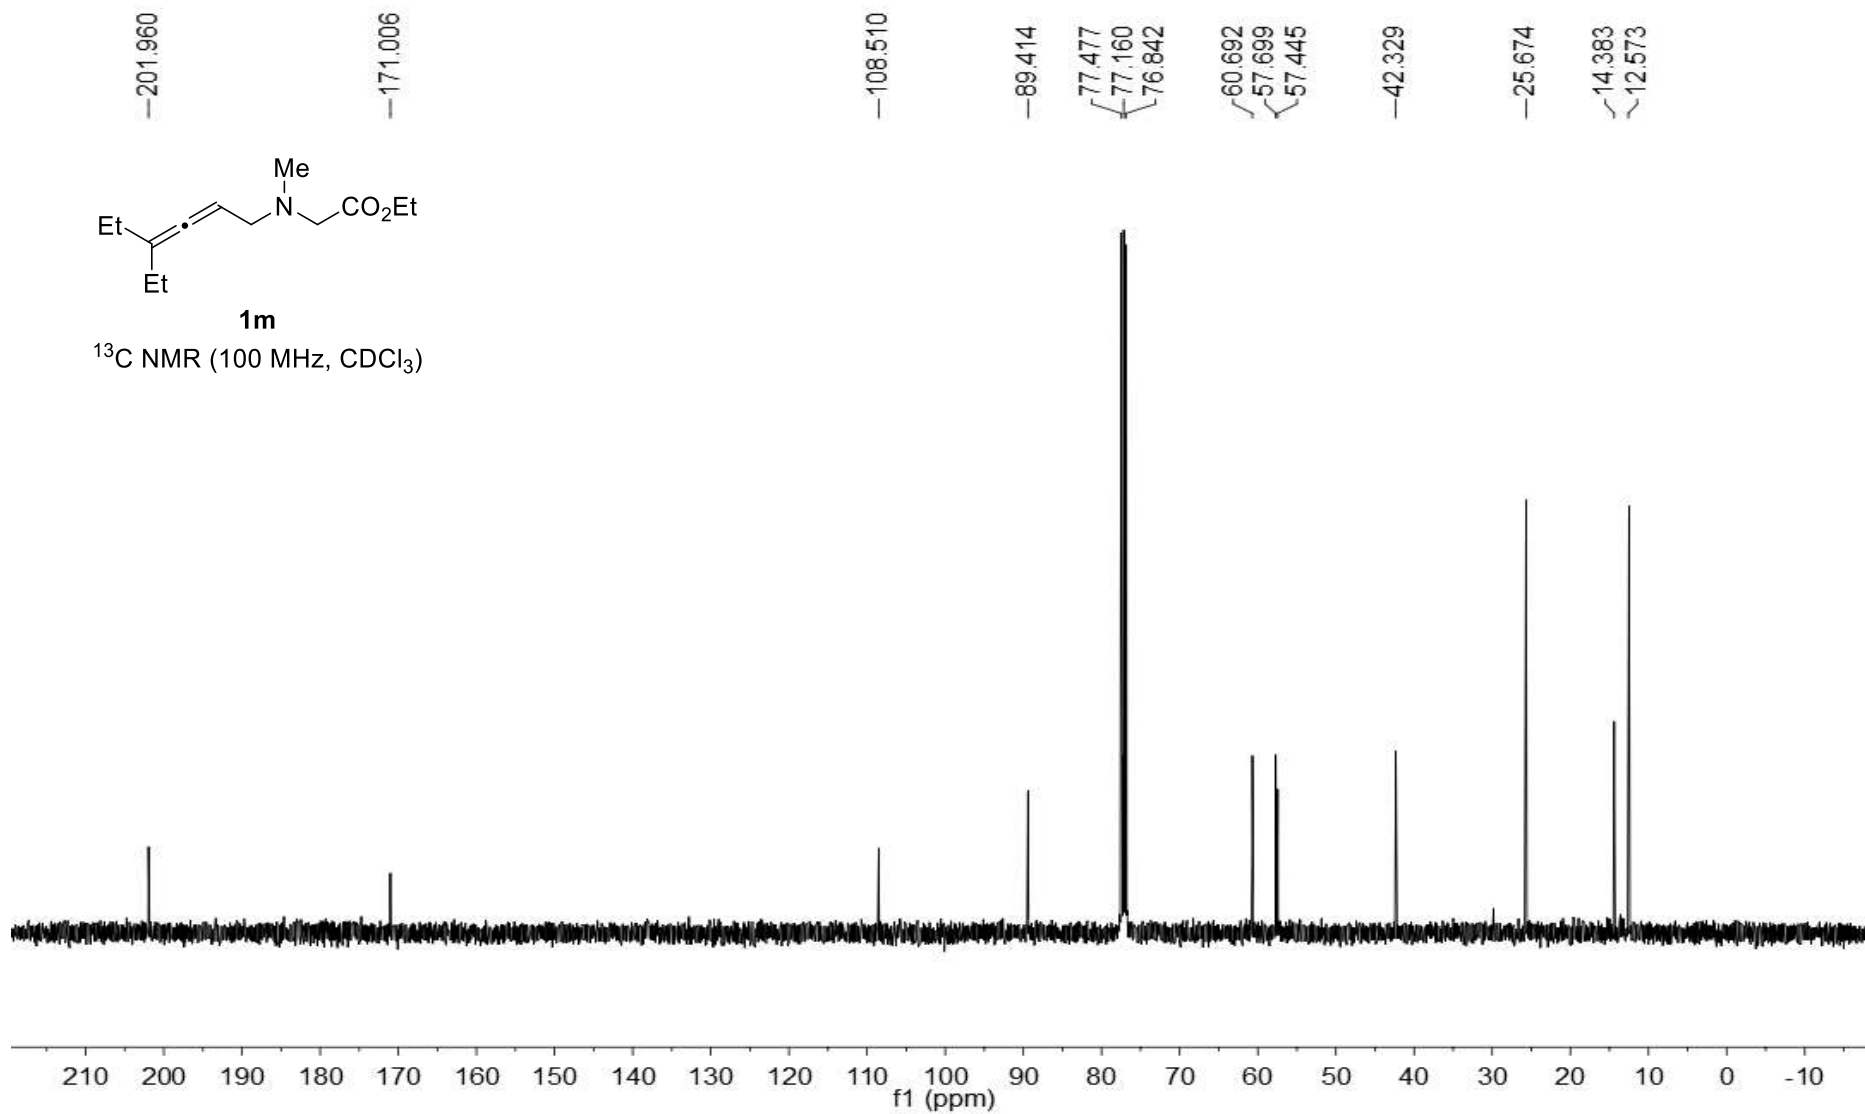

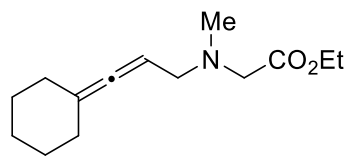

**1n**

<sup>1</sup>H NMR (400 MHz, CDCl<sub>3</sub>)

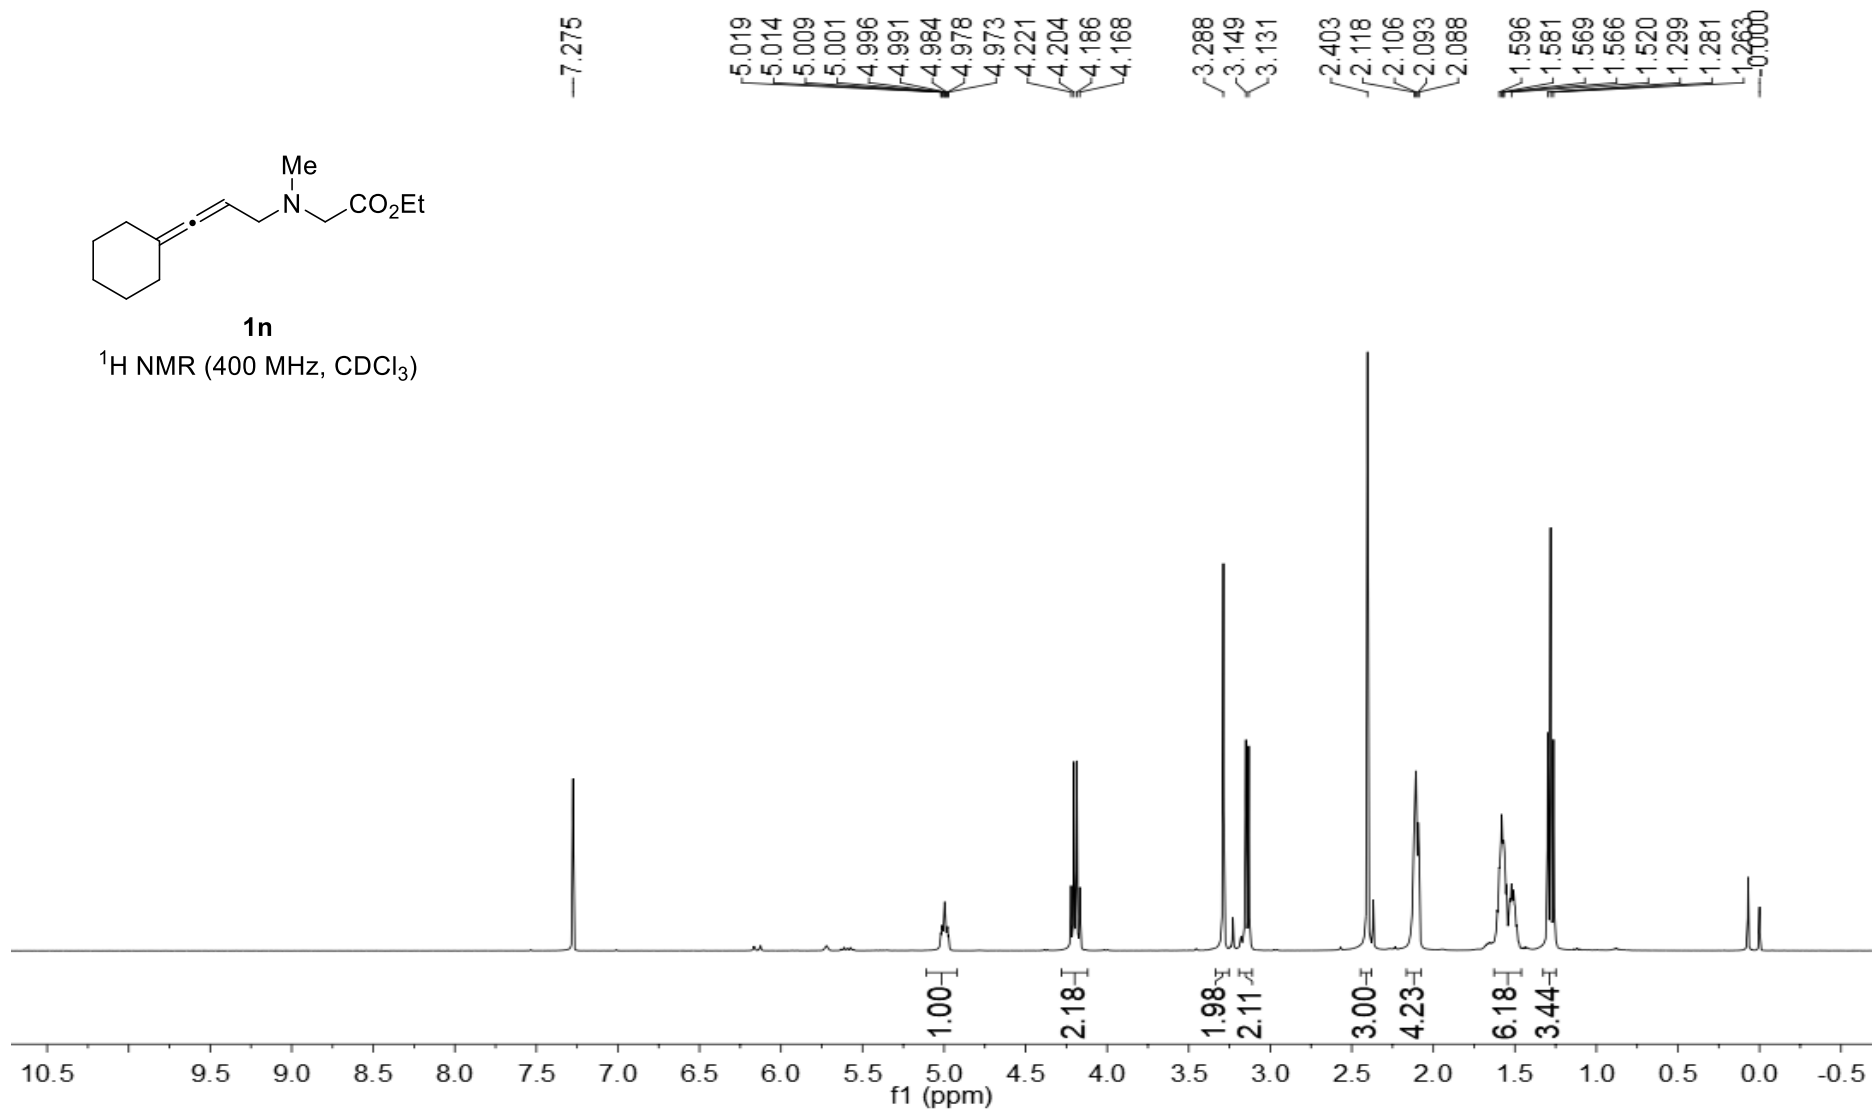

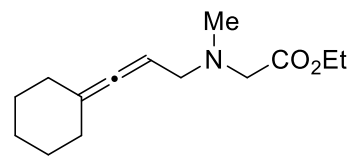

**1n**

$^{13}\text{C}$  NMR (100 MHz,  $\text{CDCl}_3$ )

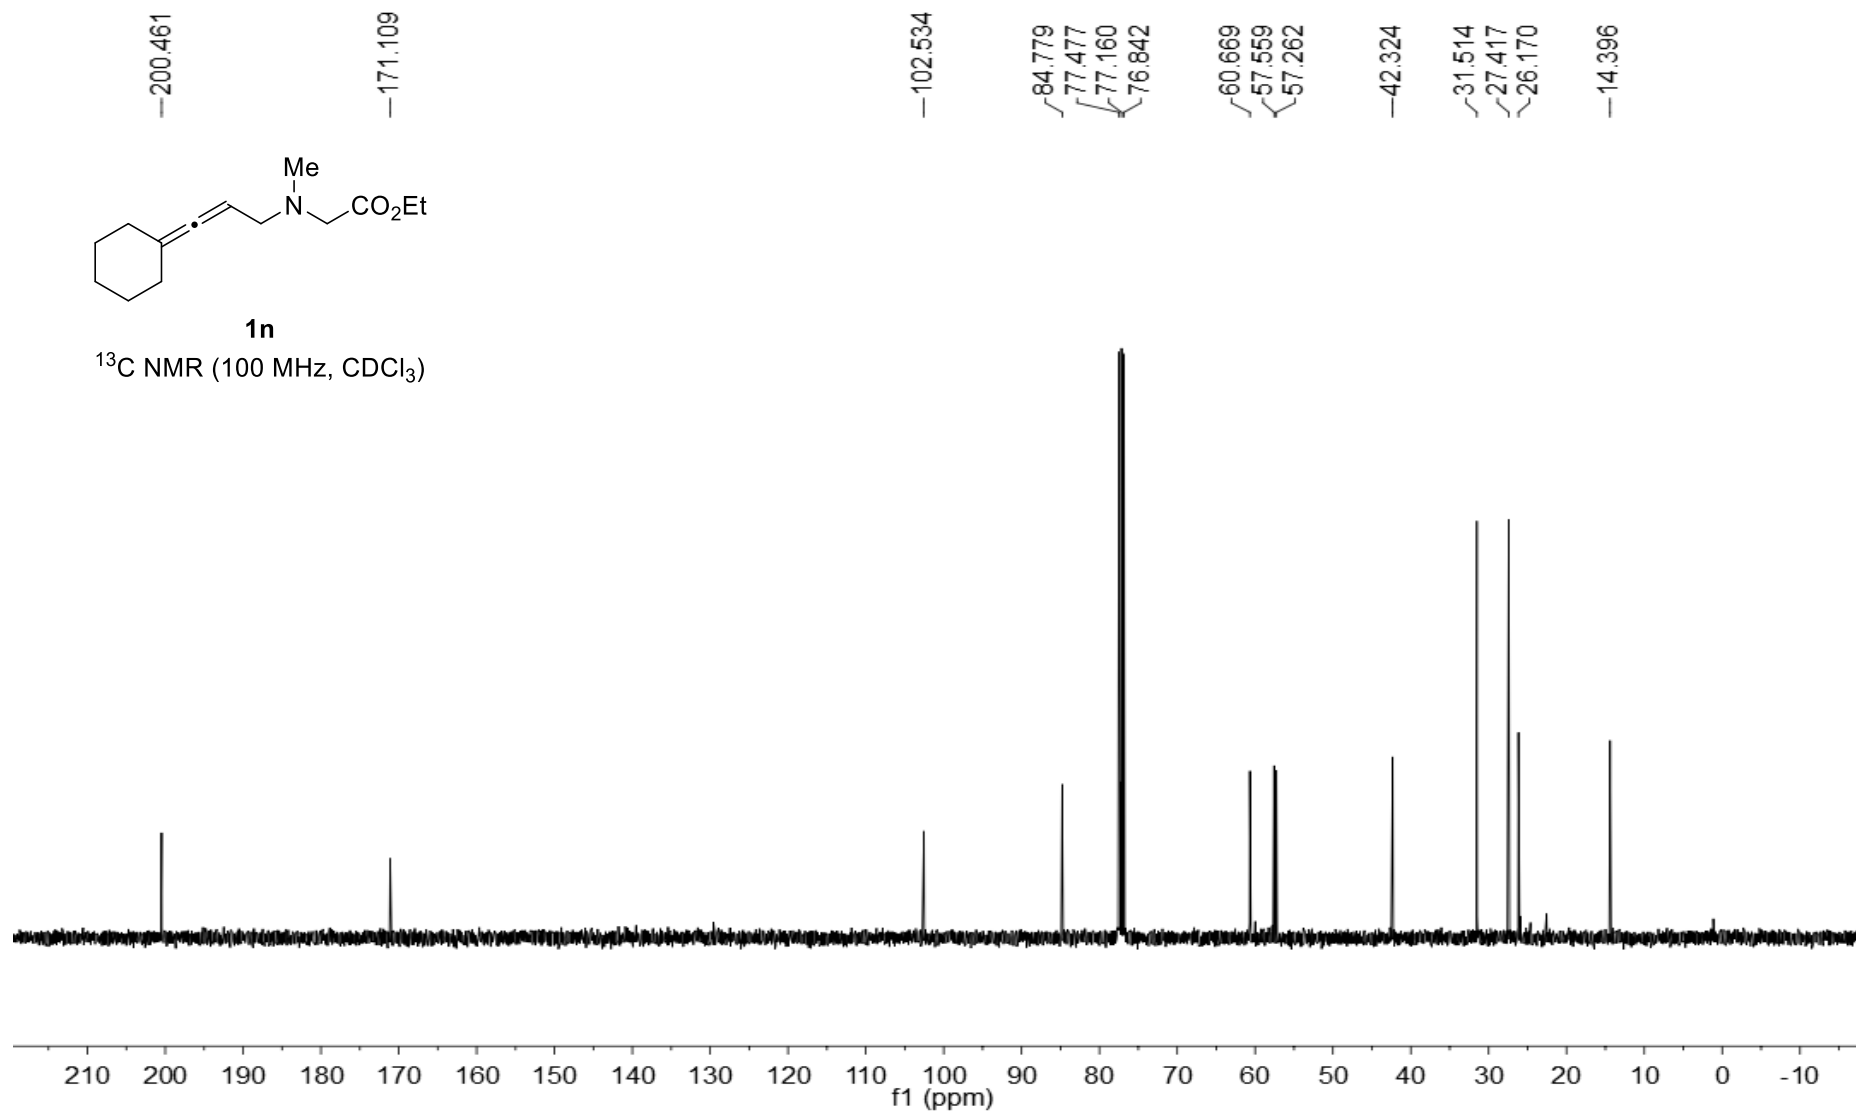

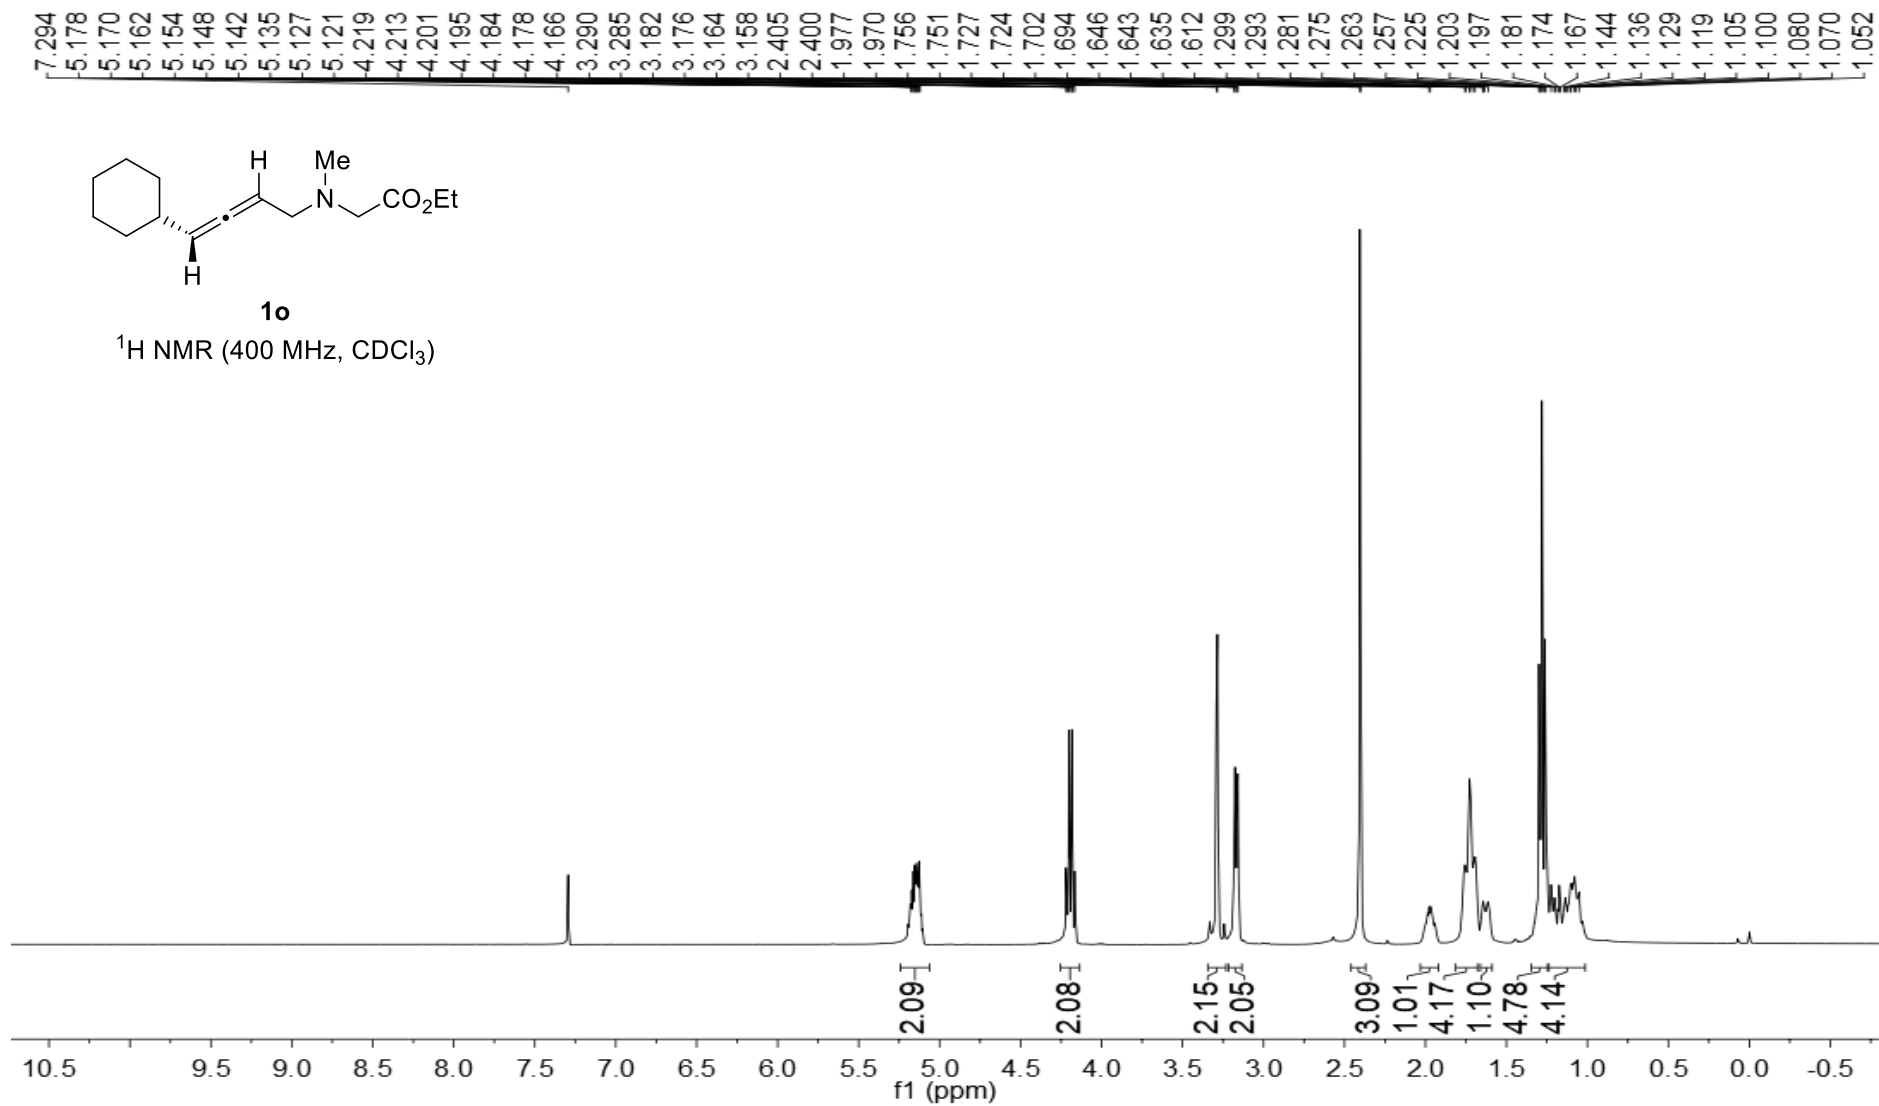

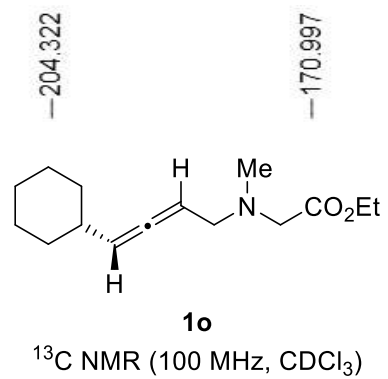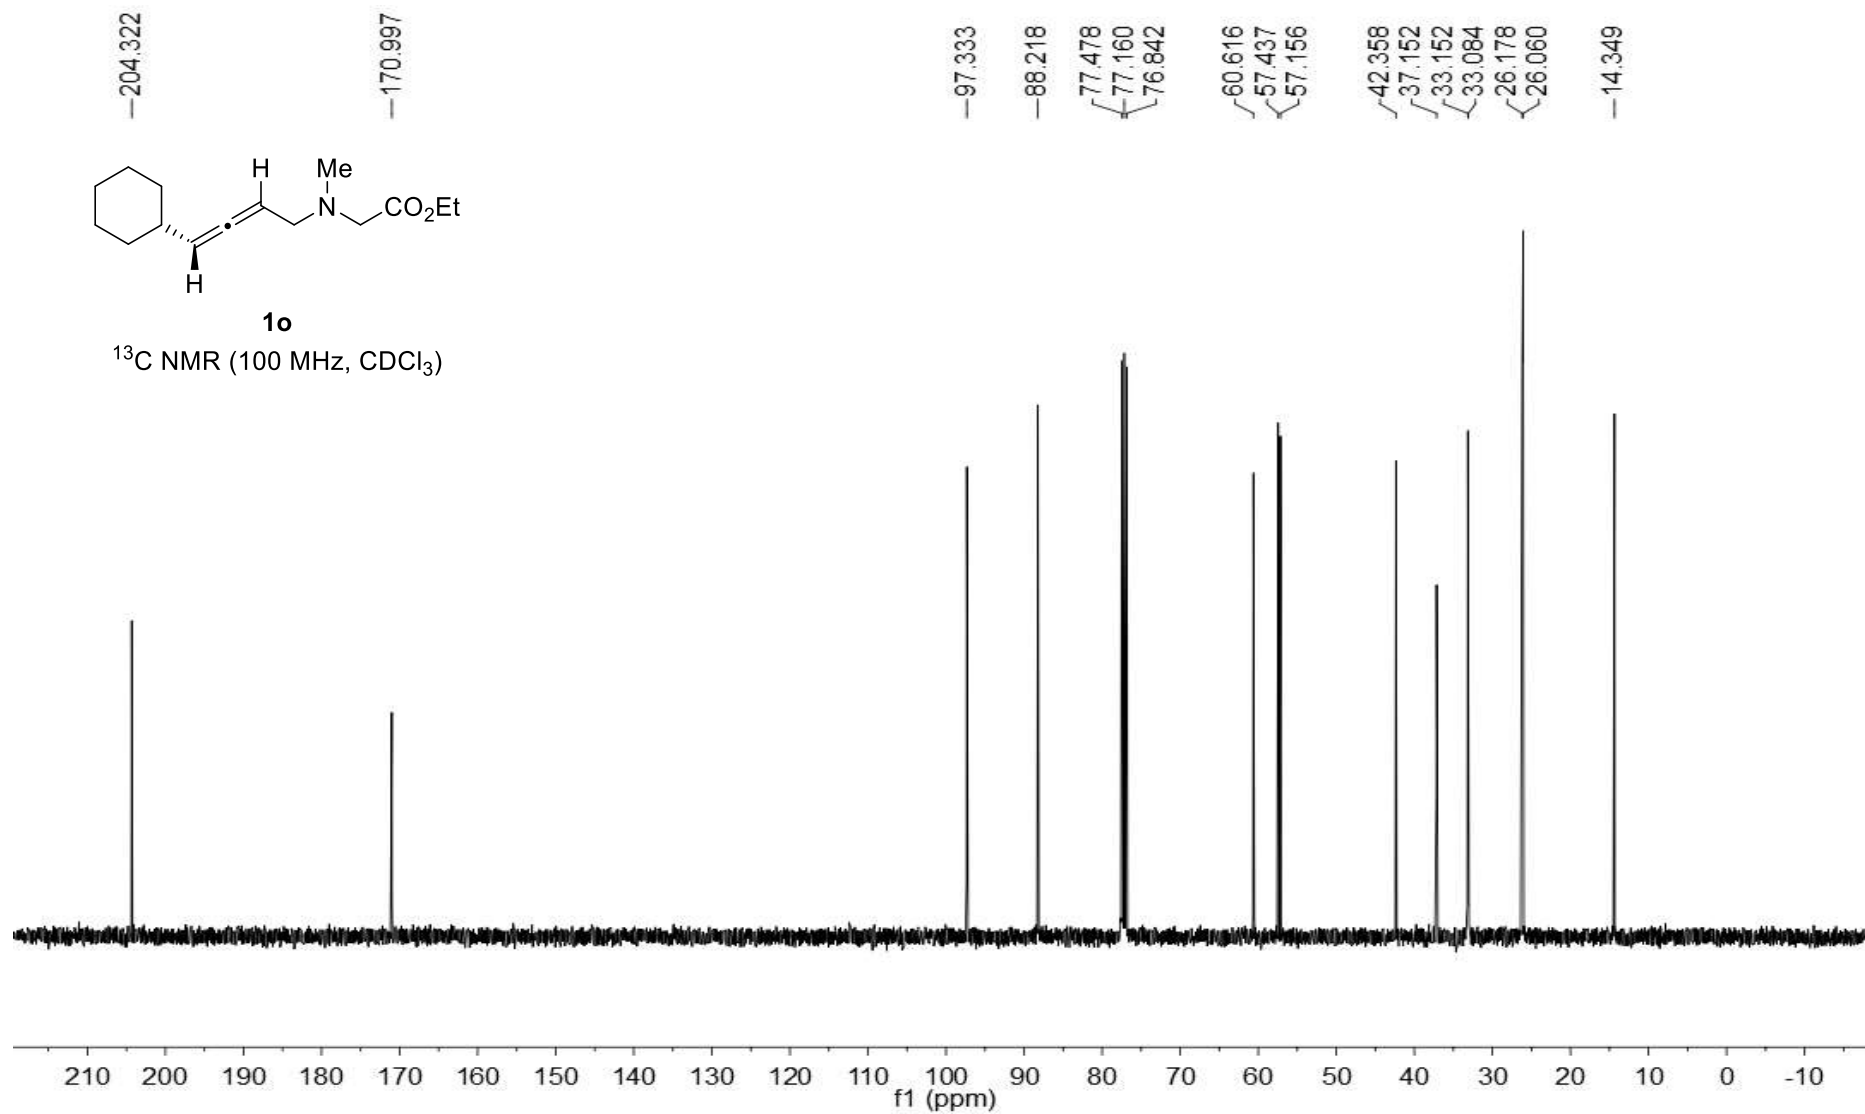



7.325  
7.322  
7.319  
7.308  
7.303  
7.293  
7.285  
7.280  
7.263  
7.218  
7.213  
7.208  
7.202  
7.197  
7.190  
7.185  
7.180  
7.175

6.205  
6.199  
6.195  
6.189  
6.147  
5.630  
5.613  
5.596

4.204  
4.189  
4.186  
4.171  
4.169  
4.153  
4.151  
3.345  
3.334  
3.329  
3.323

-2.472

1.279  
1.262  
1.244

-0.000

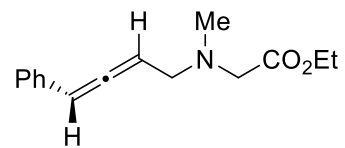

**1p**

<sup>1</sup>H NMR (400 MHz, CDCl<sub>3</sub>)

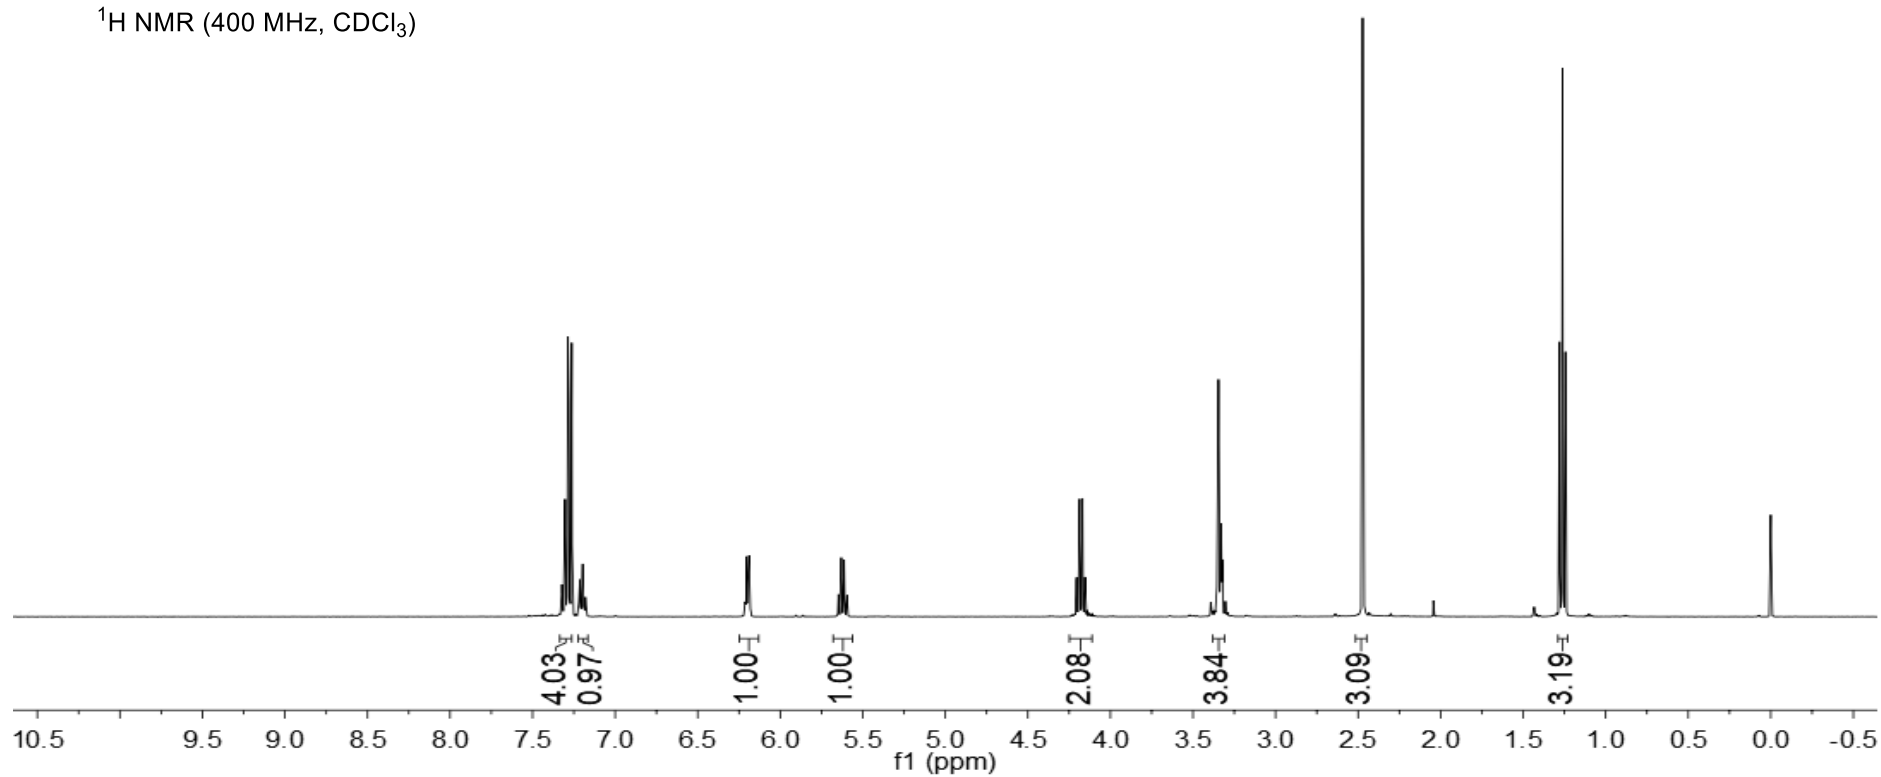

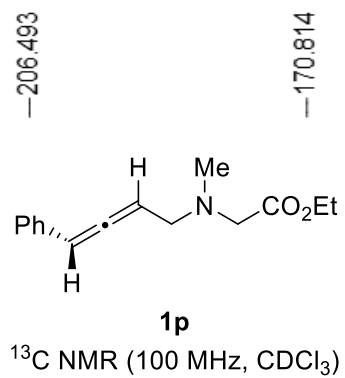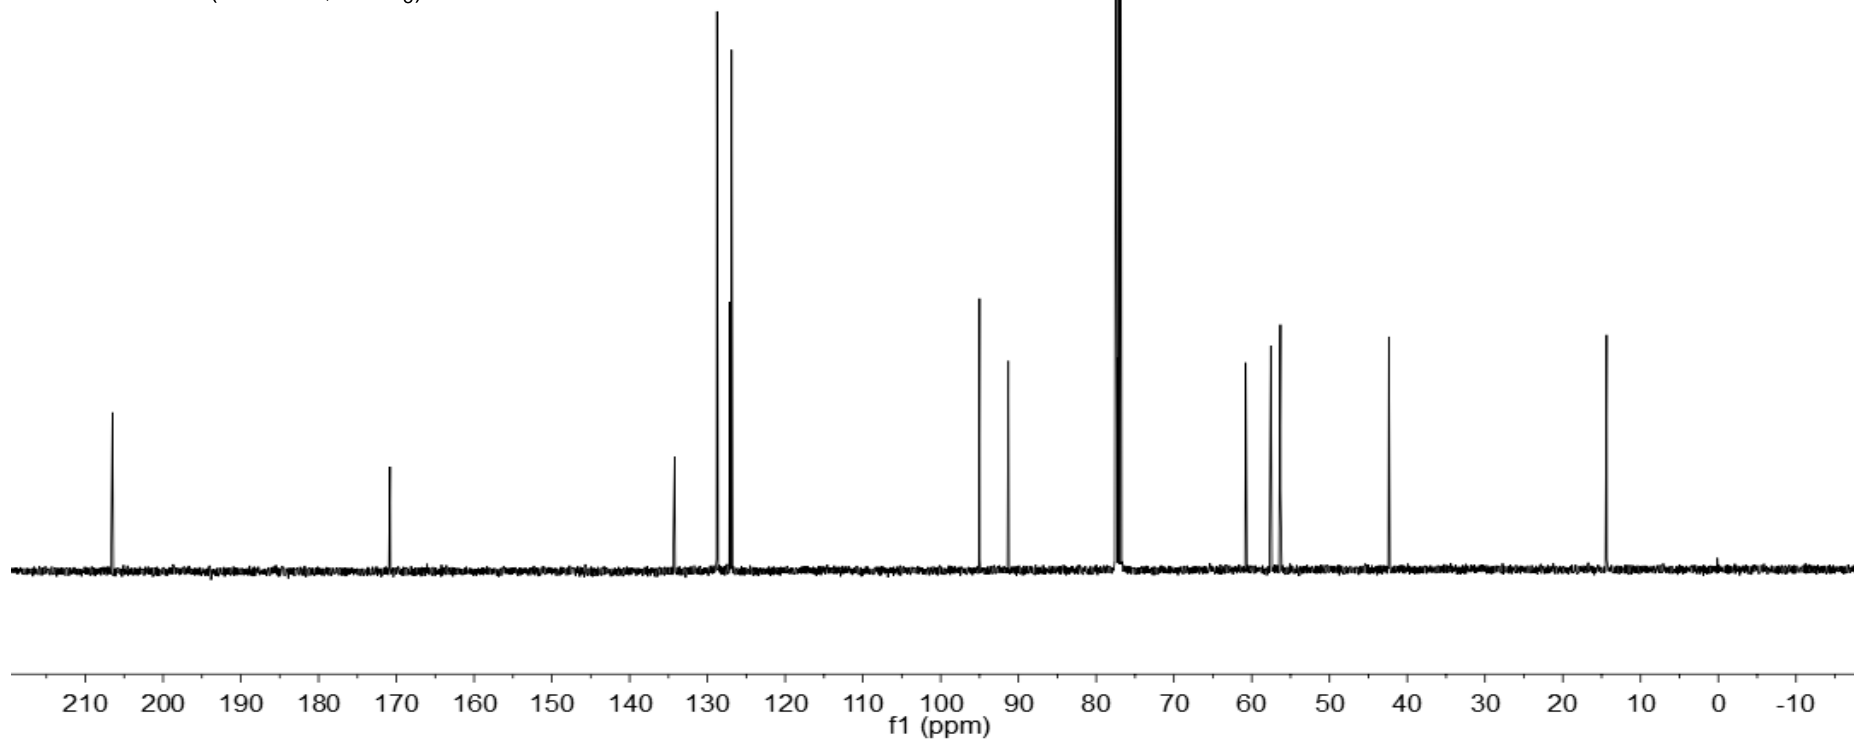

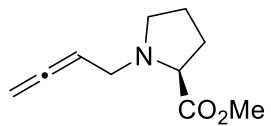

**1q**

<sup>1</sup>H NMR (400 MHz, CDCl<sub>3</sub>)

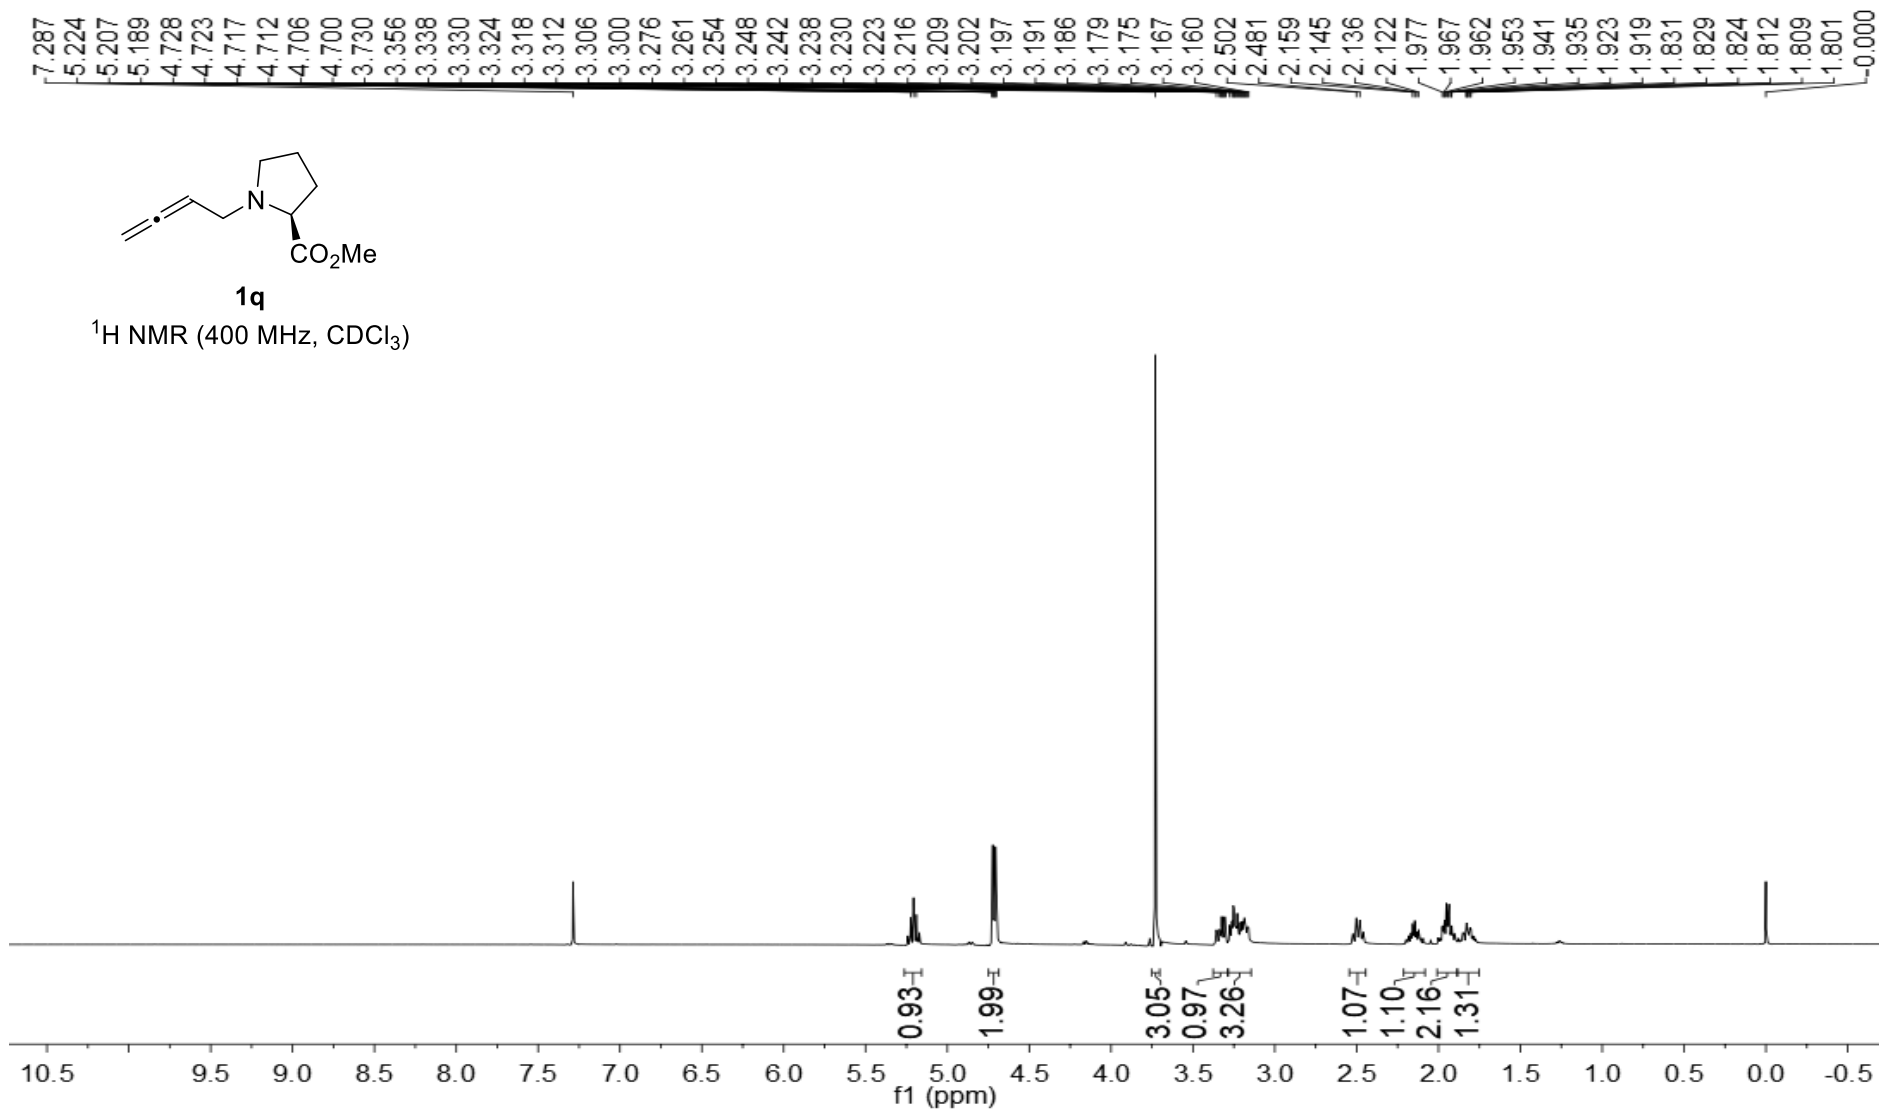

—209.504

—174.678

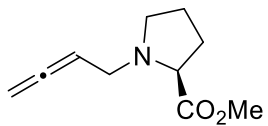

**1q**

<sup>13</sup>C NMR (100 MHz, CDCl<sub>3</sub>)

—86.704

77.478

77.160

76.842

75.051

—64.737

53.281

53.109

52.030

—29.737

—23.299

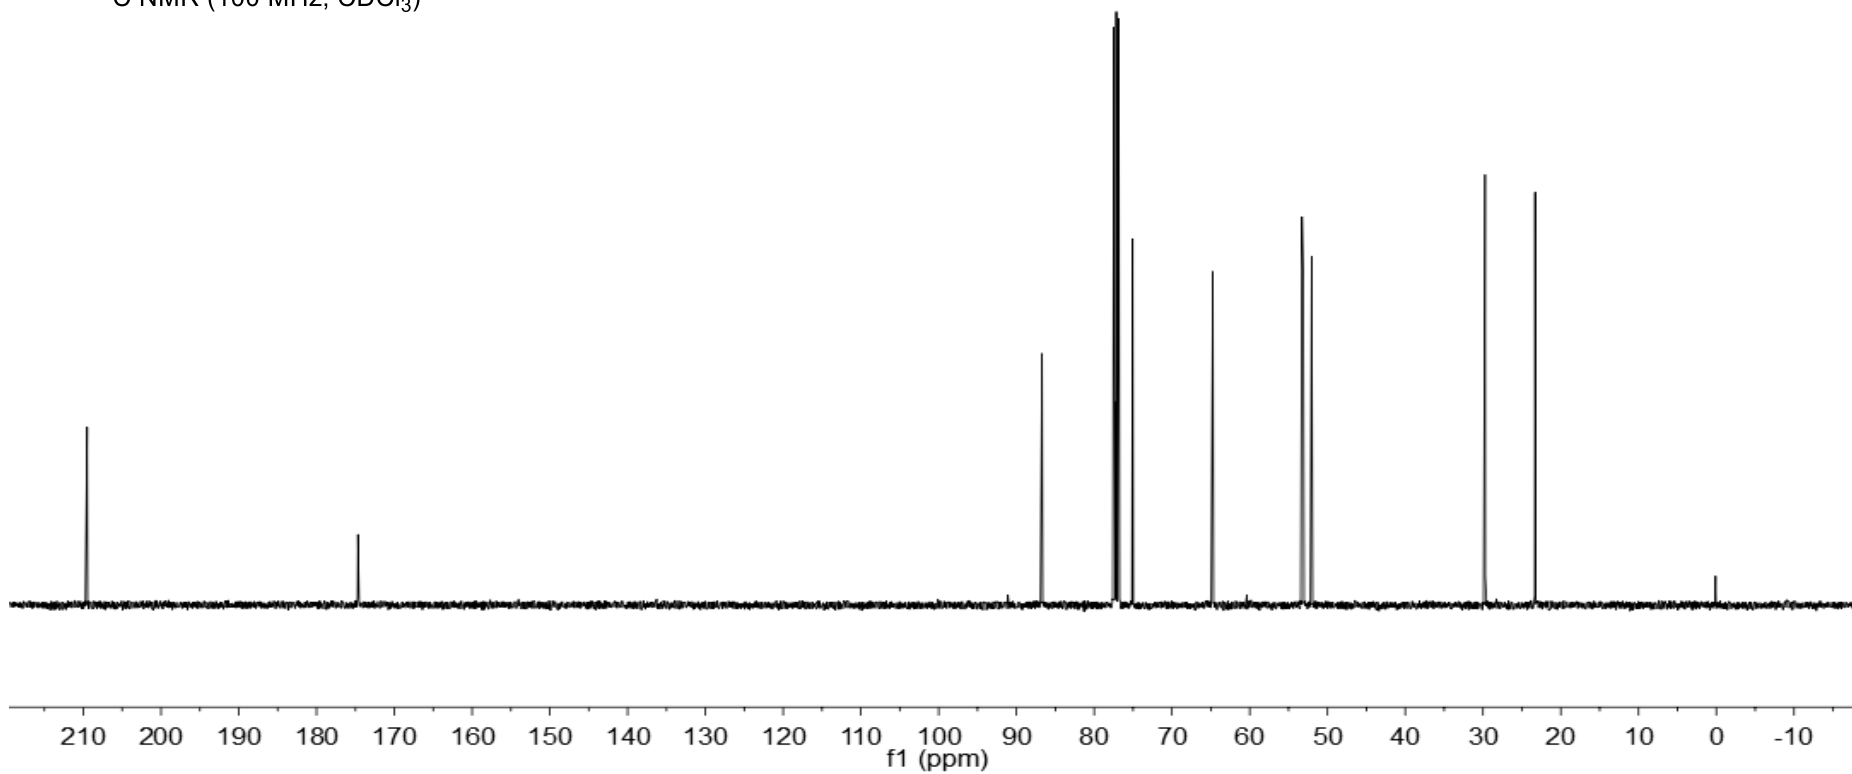

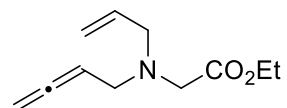

**1r**

<sup>1</sup>H NMR (400 MHz, CDCl<sub>3</sub>)

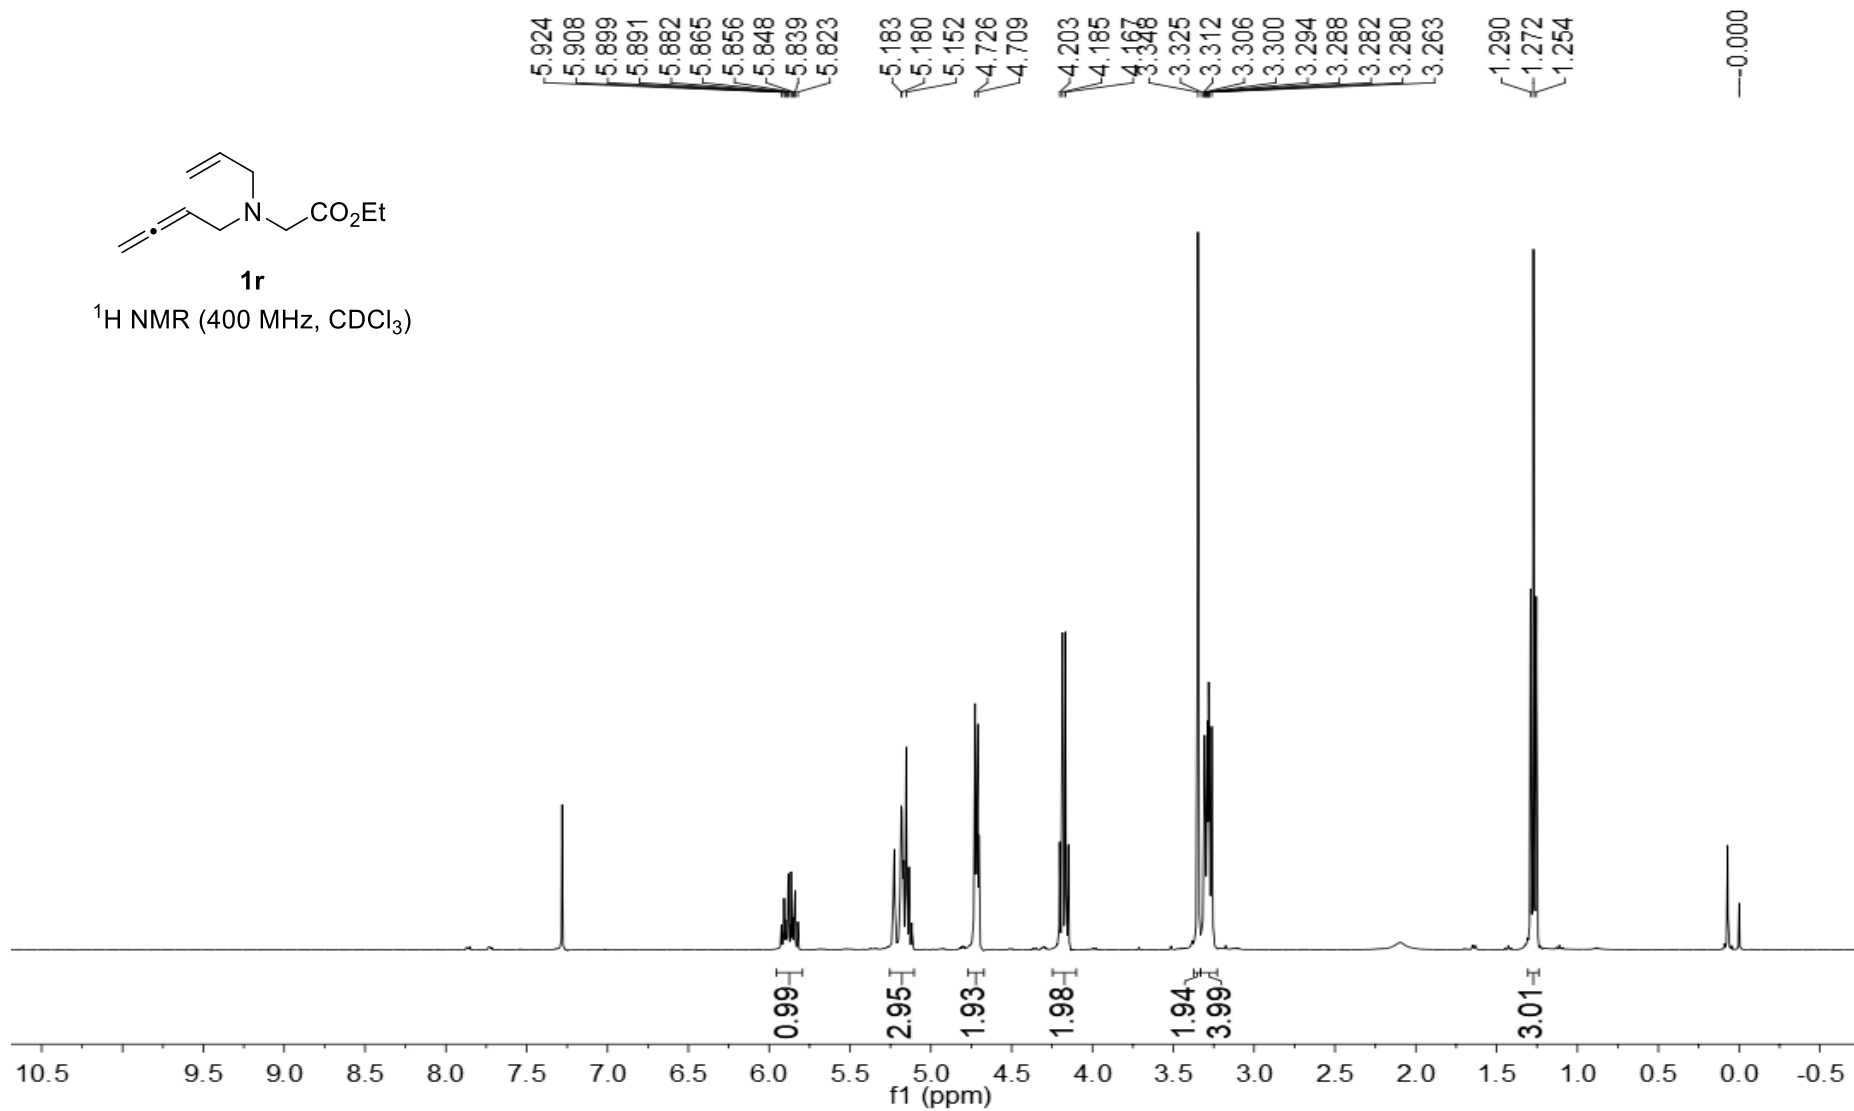

-209.828

-171.345

-135.076

-118.522

-86.394

77.478

77.160

76.843

74.990

60.573

57.192

53.978

53.203

-14.381

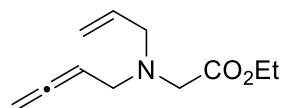

**1r**

<sup>13</sup>C NMR (100 MHz, CDCl<sub>3</sub>)

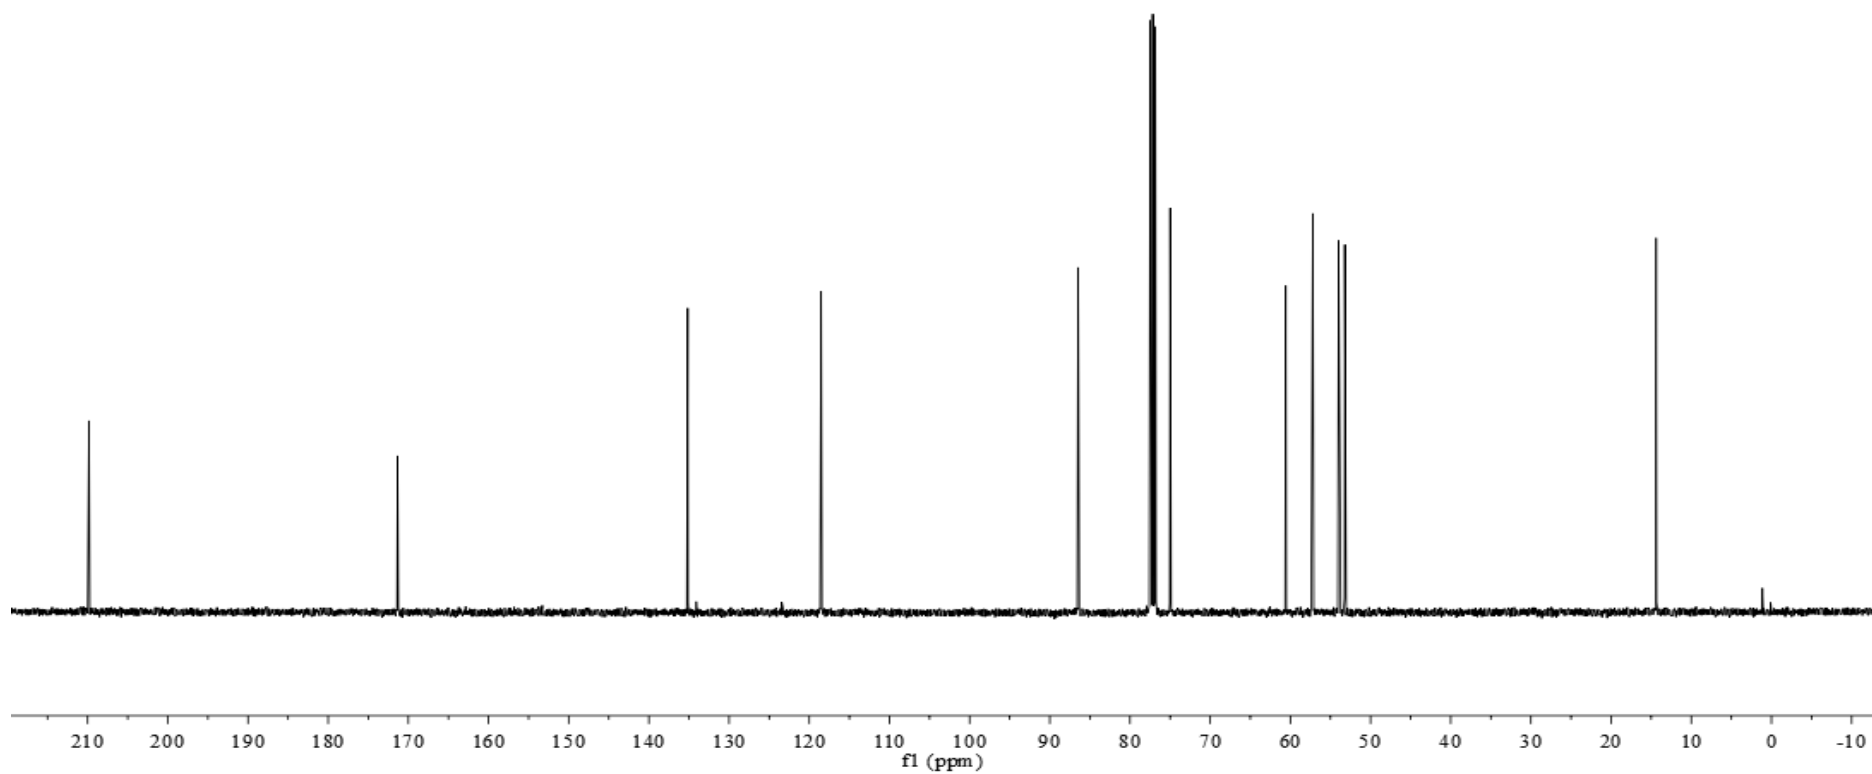

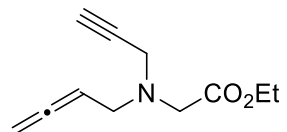

**1s**

<sup>1</sup>H NMR (400 MHz, CDCl<sub>3</sub>)

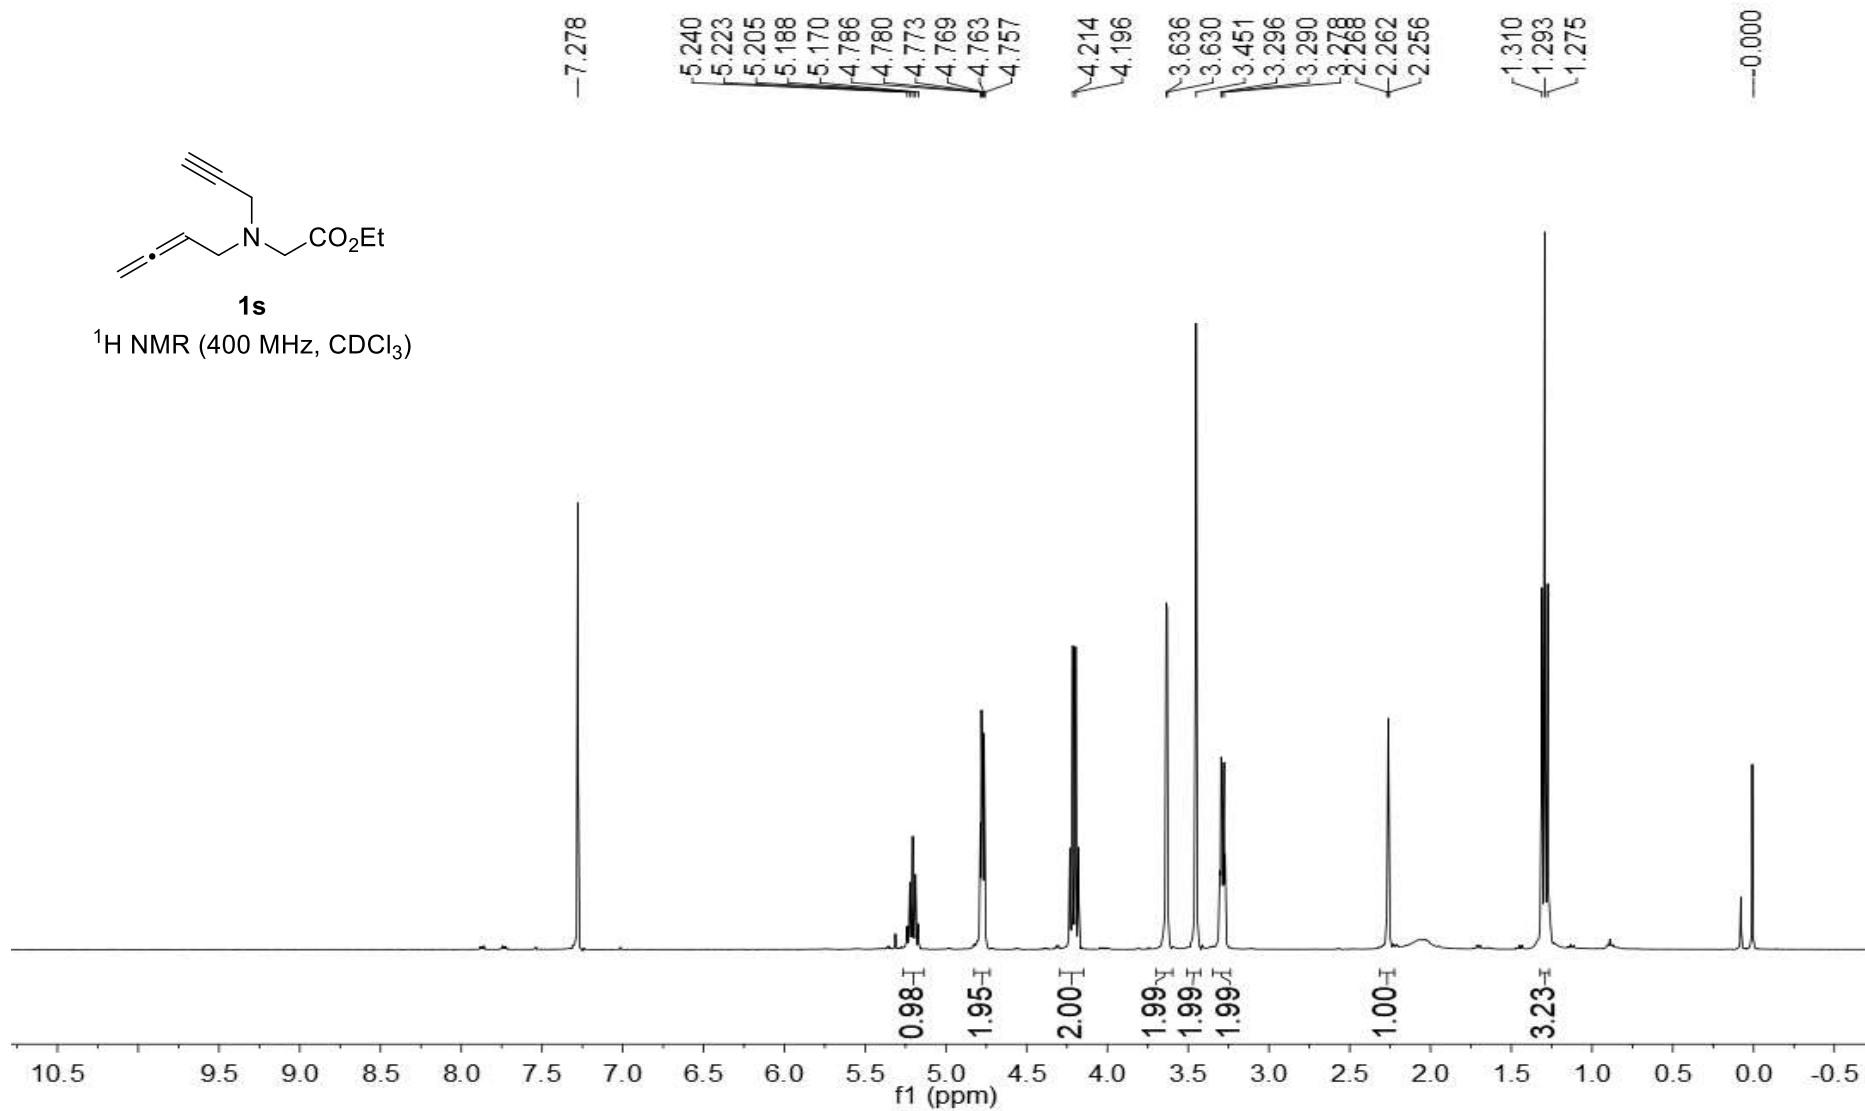

-210.058

-170.727

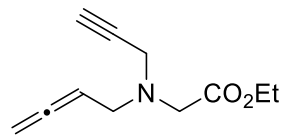

**1s**

<sup>13</sup>C NMR (100 MHz, CDCl<sub>3</sub>)

-86.943

-78.050

-77.477

-77.160

-76.842

-75.442

-66.911

-53.667

-53.340

-42.682

-14.356

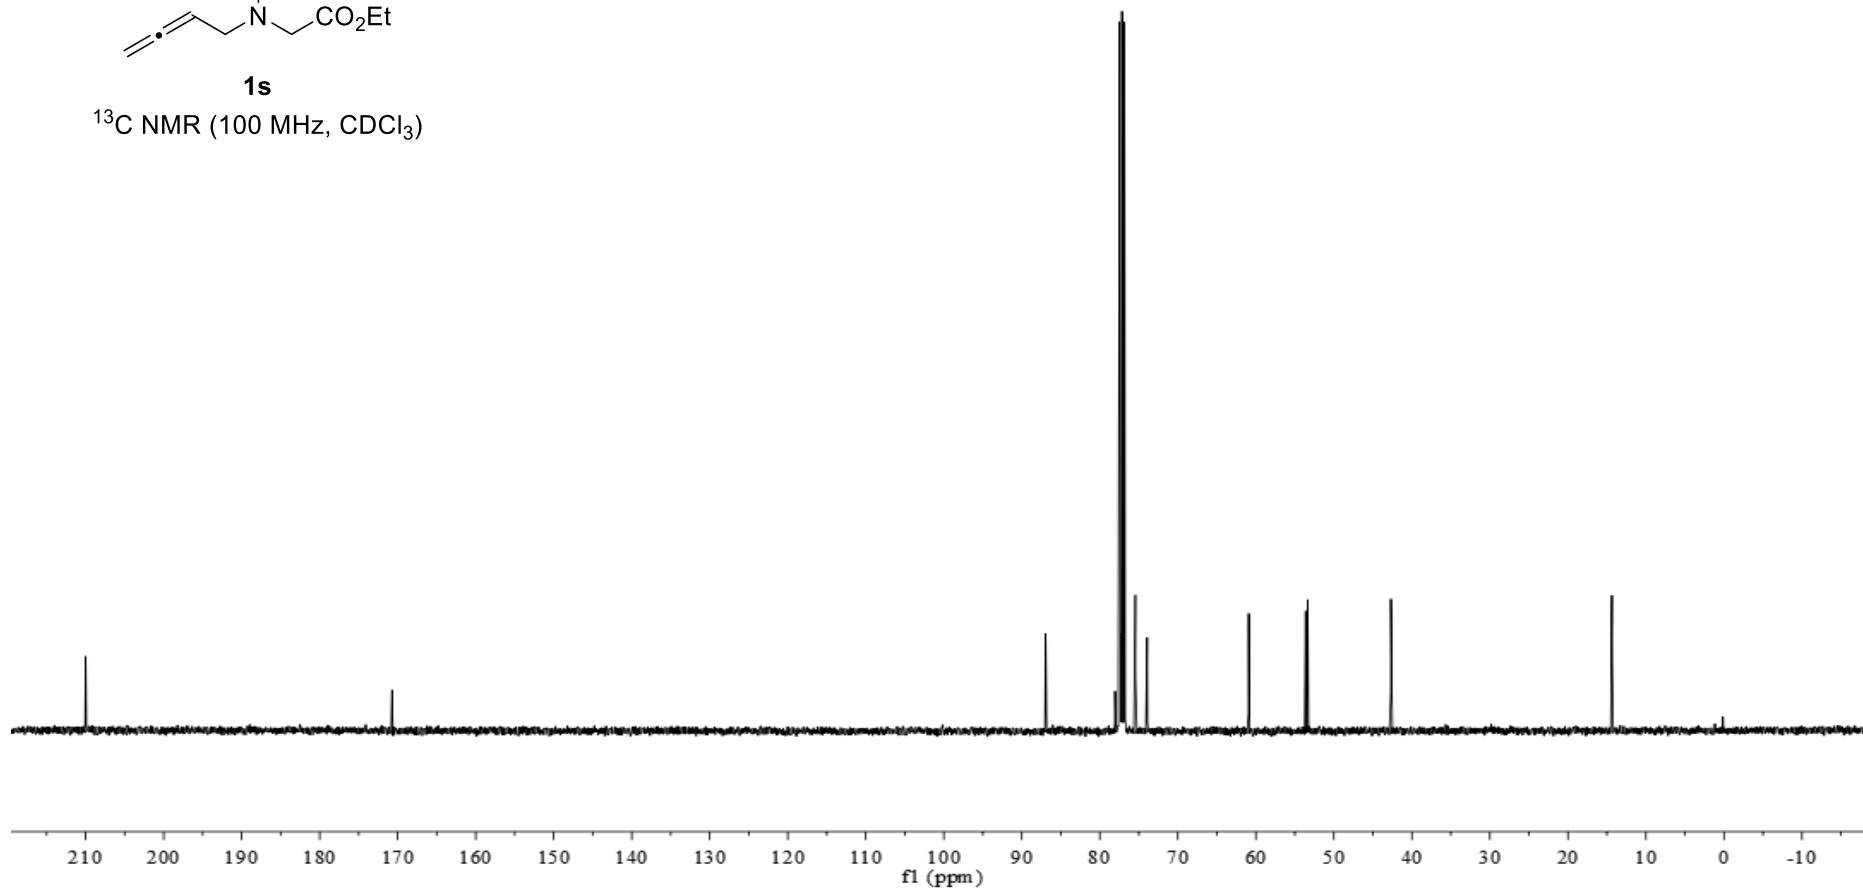



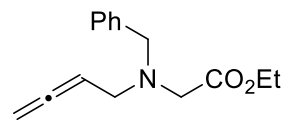

**1t**

<sup>1</sup>H NMR (400 MHz, CDCl<sub>3</sub>)

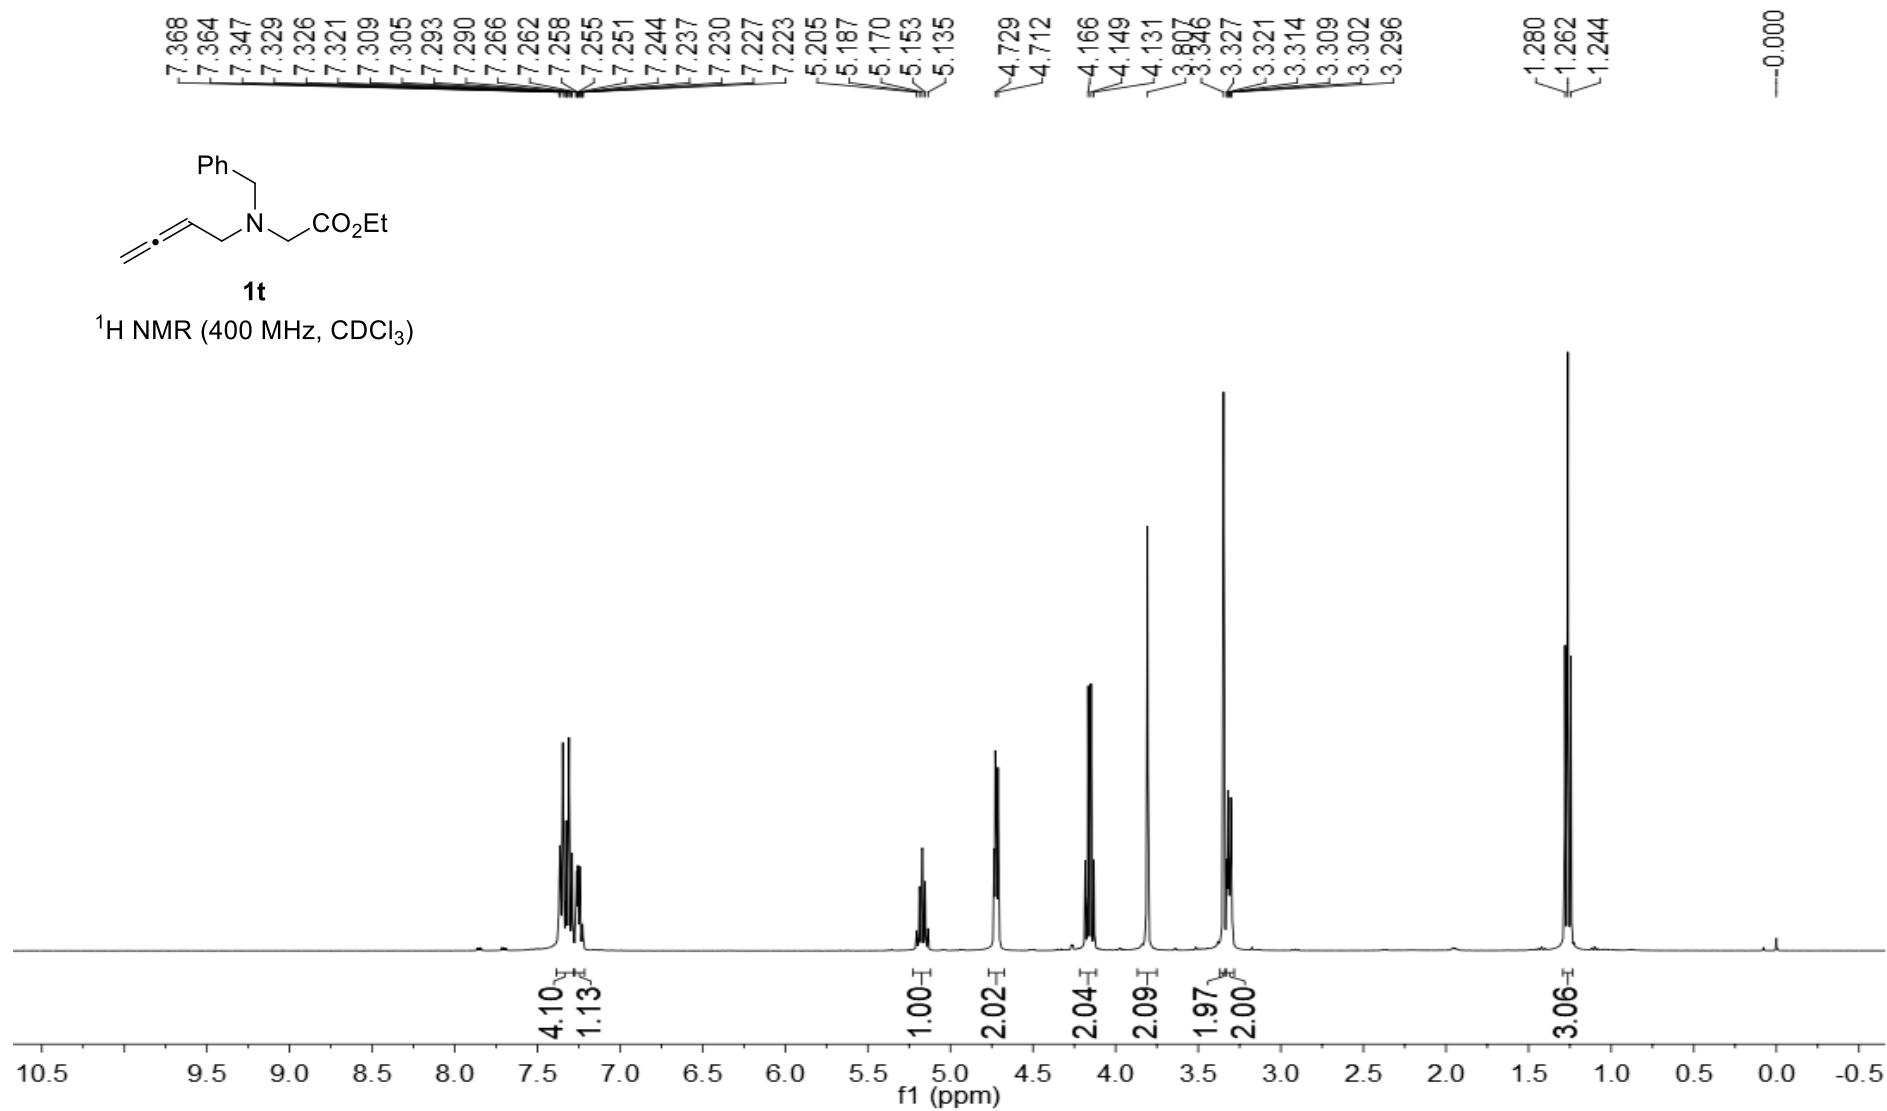

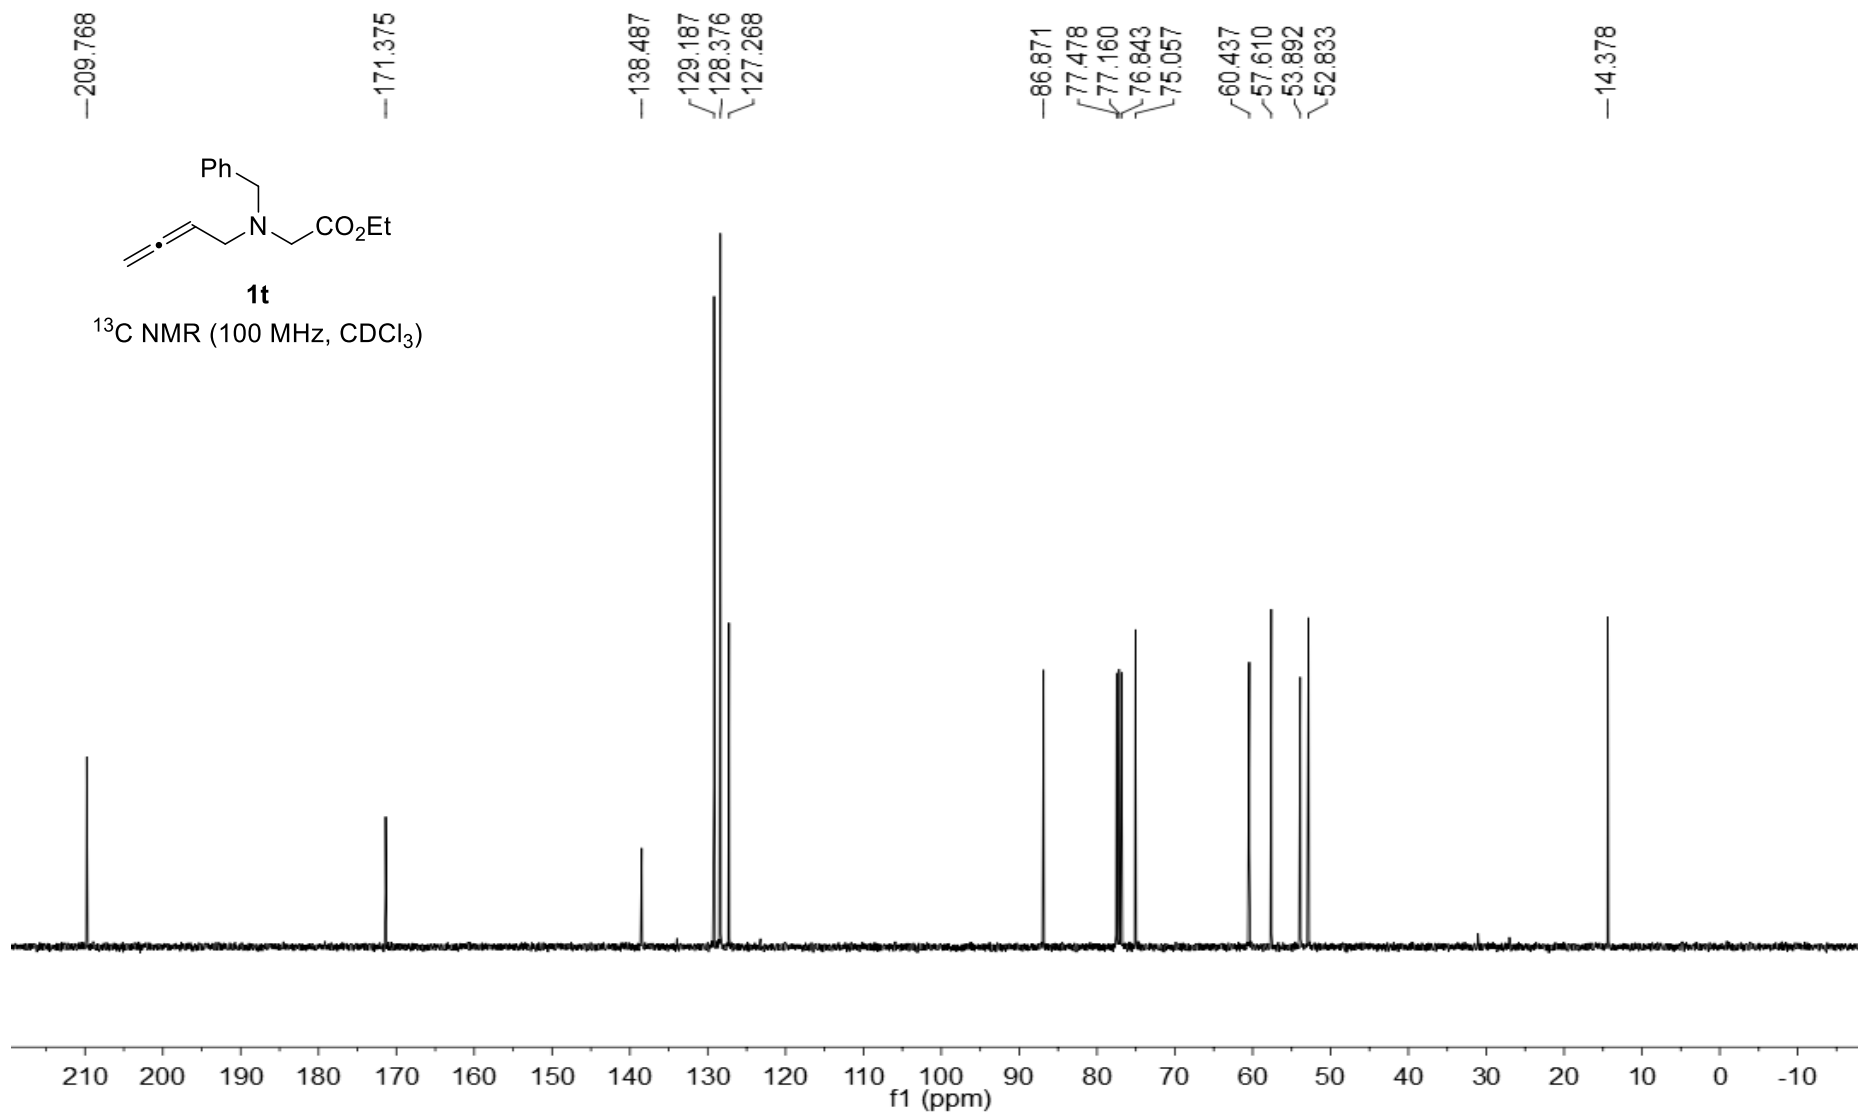

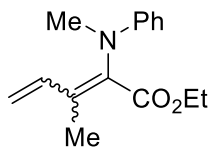

**3a'** (53:47 Z/E)  
<sup>1</sup>H NMR (500 MHz, CDCl<sub>3</sub>)

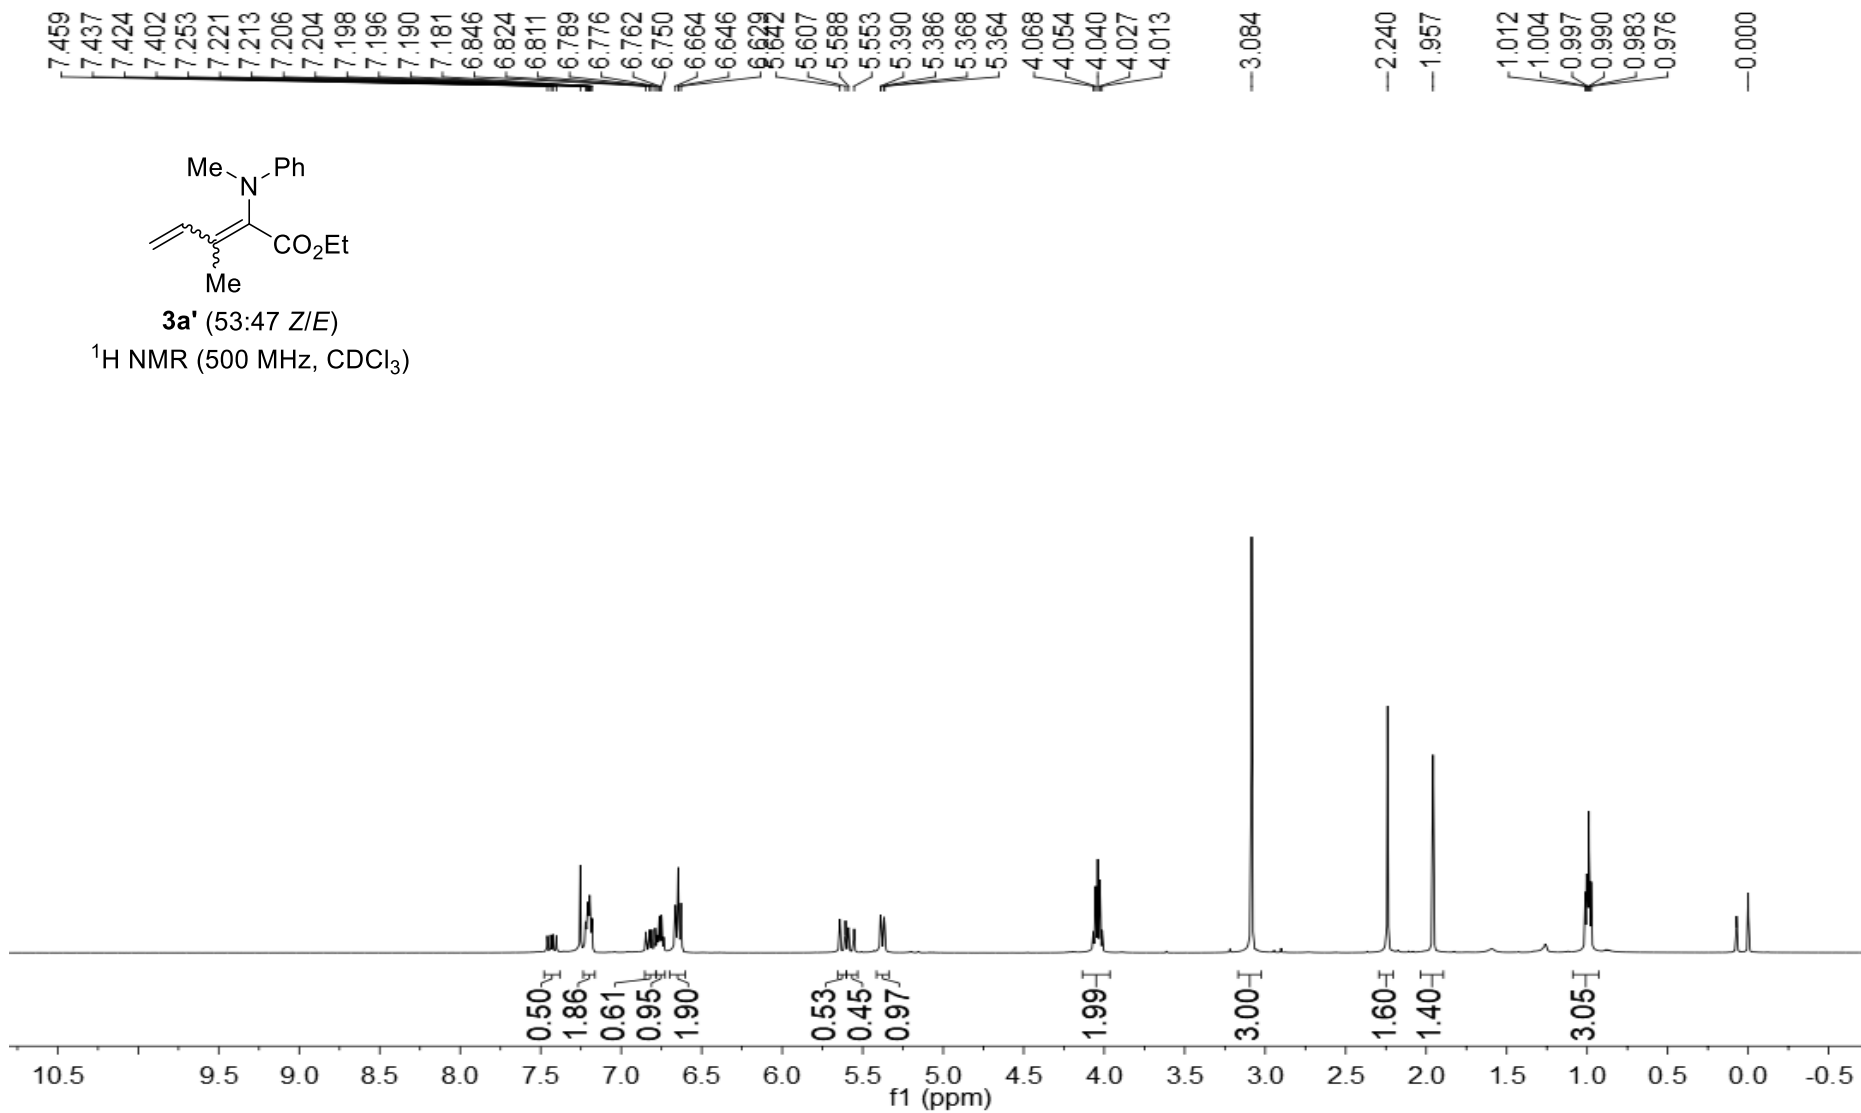

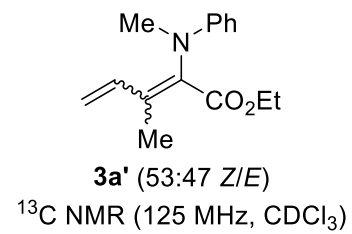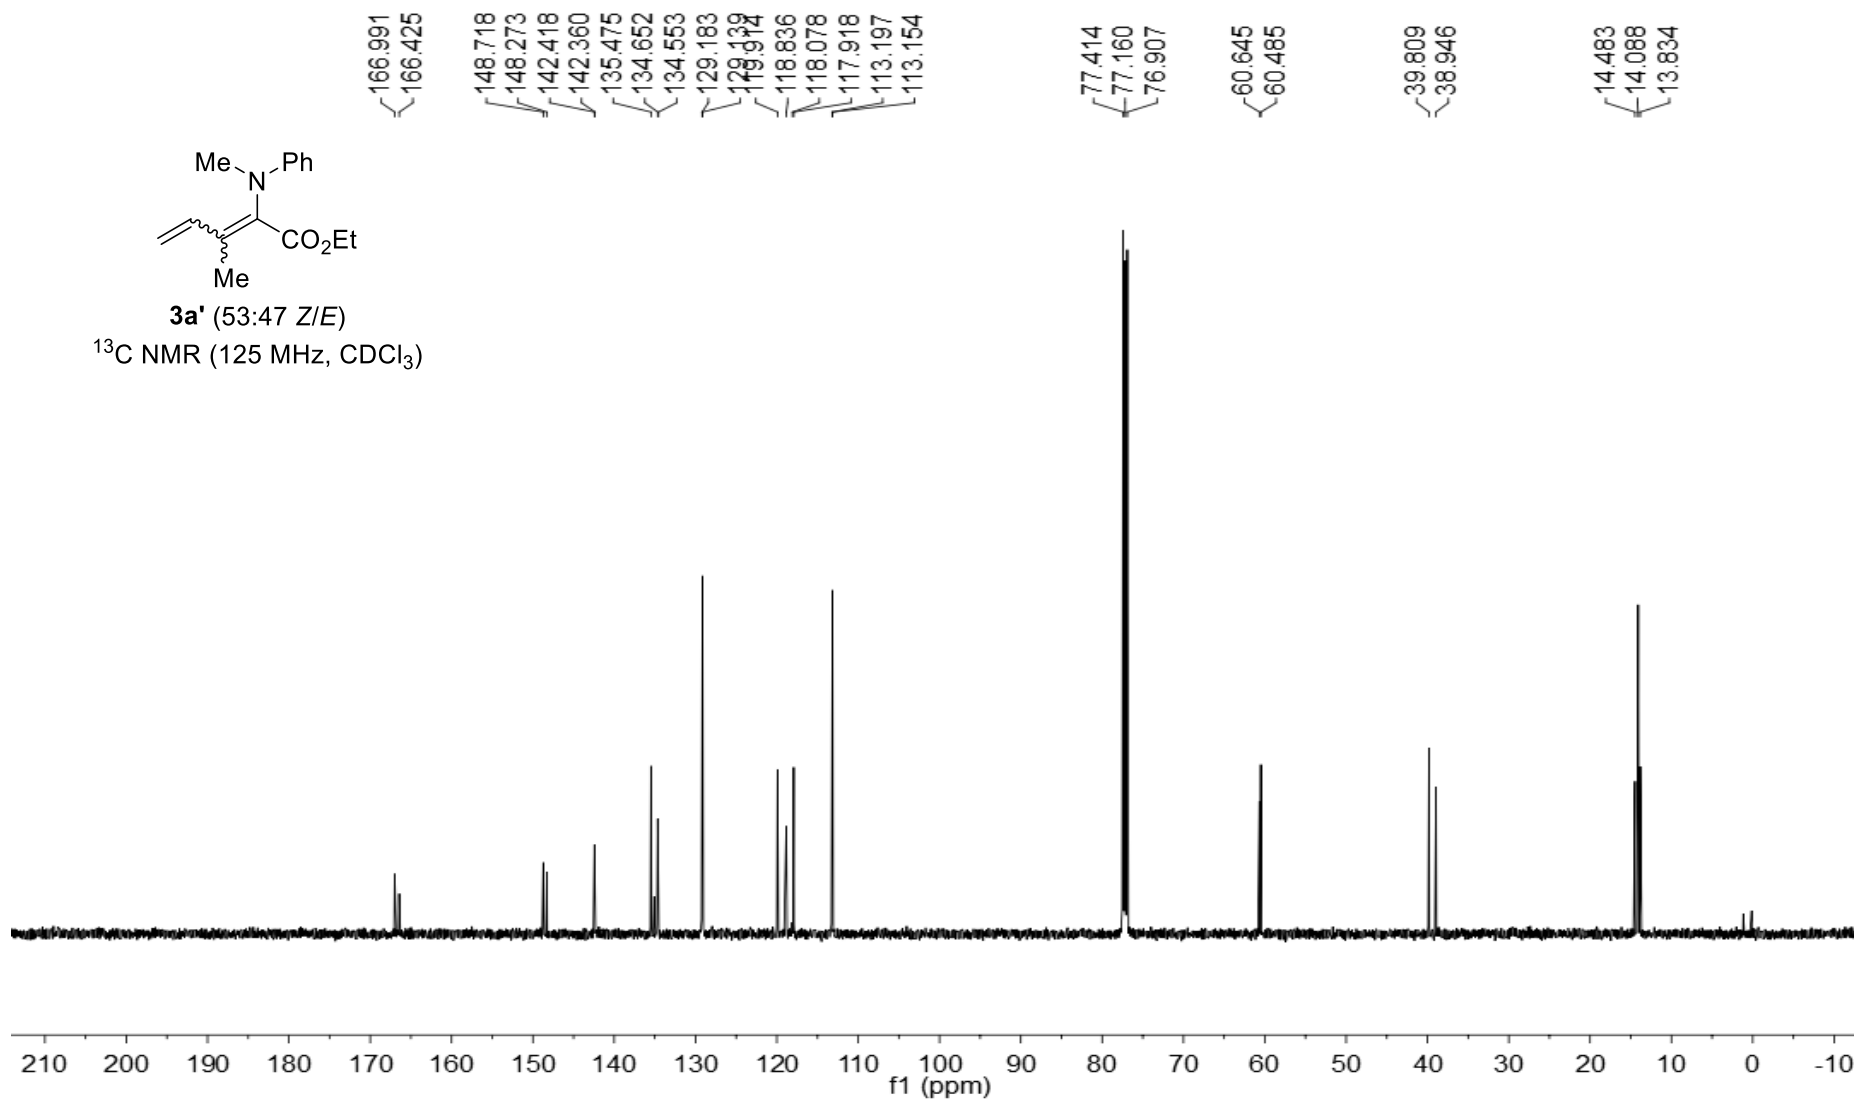

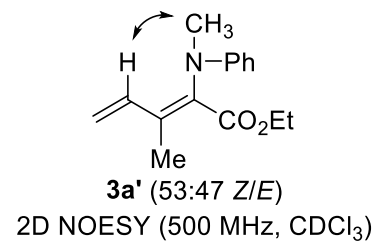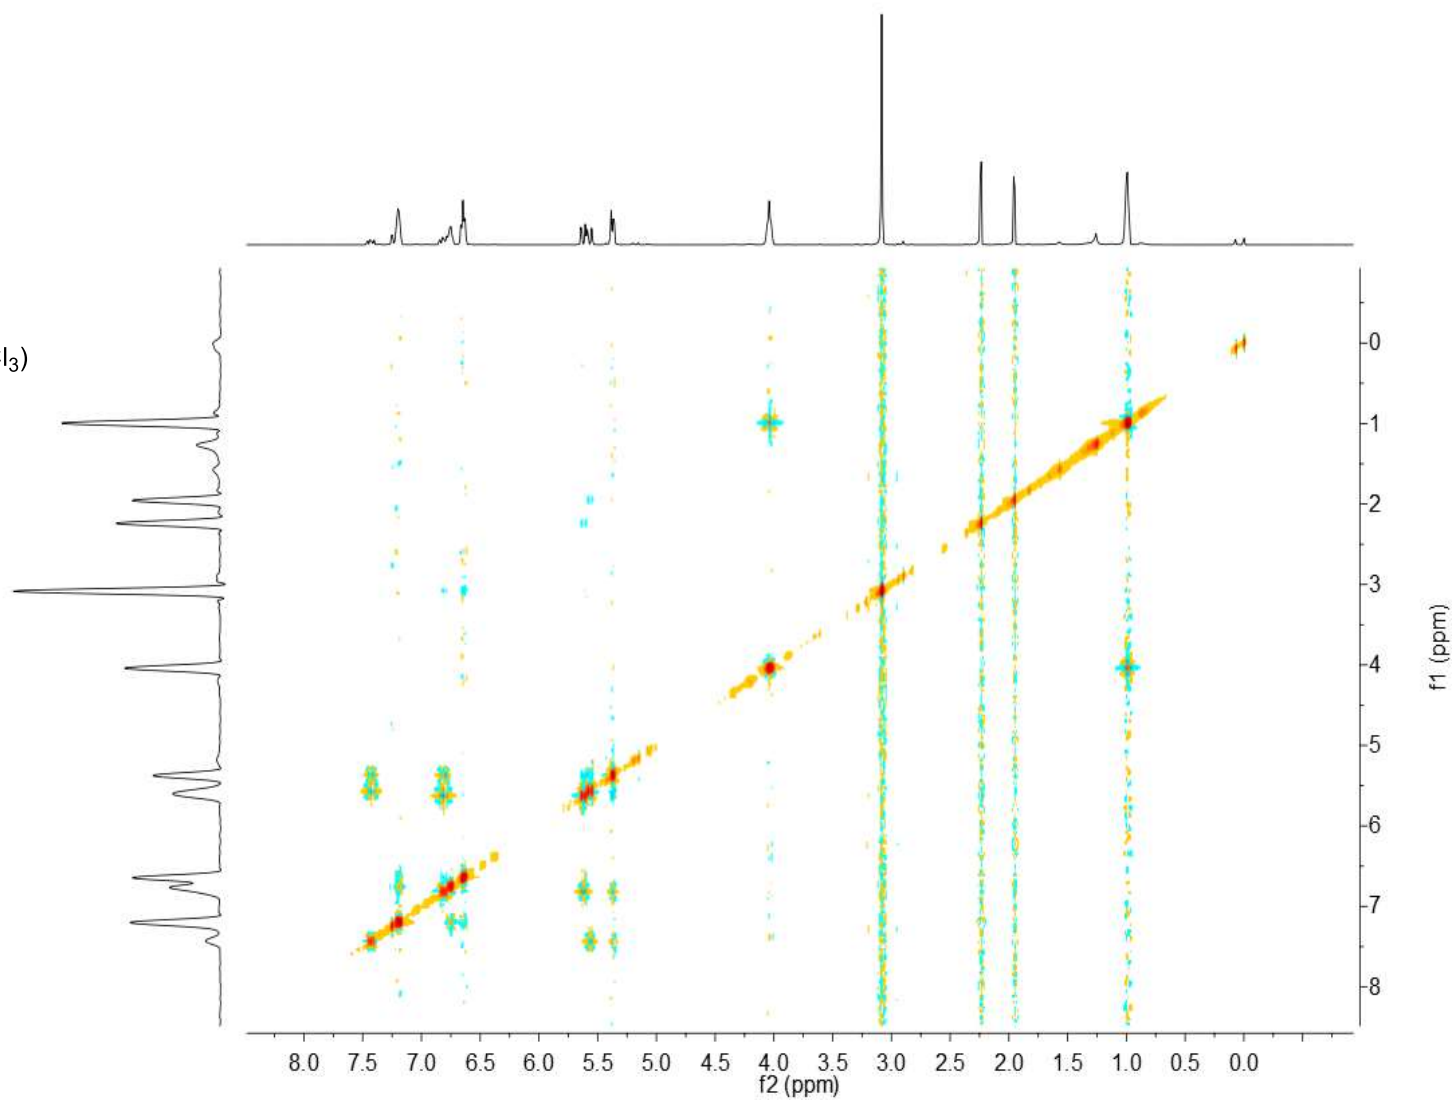

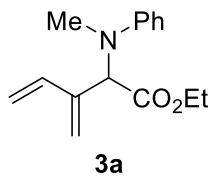

<sup>1</sup>H NMR (400 MHz, CDCl<sub>3</sub>)

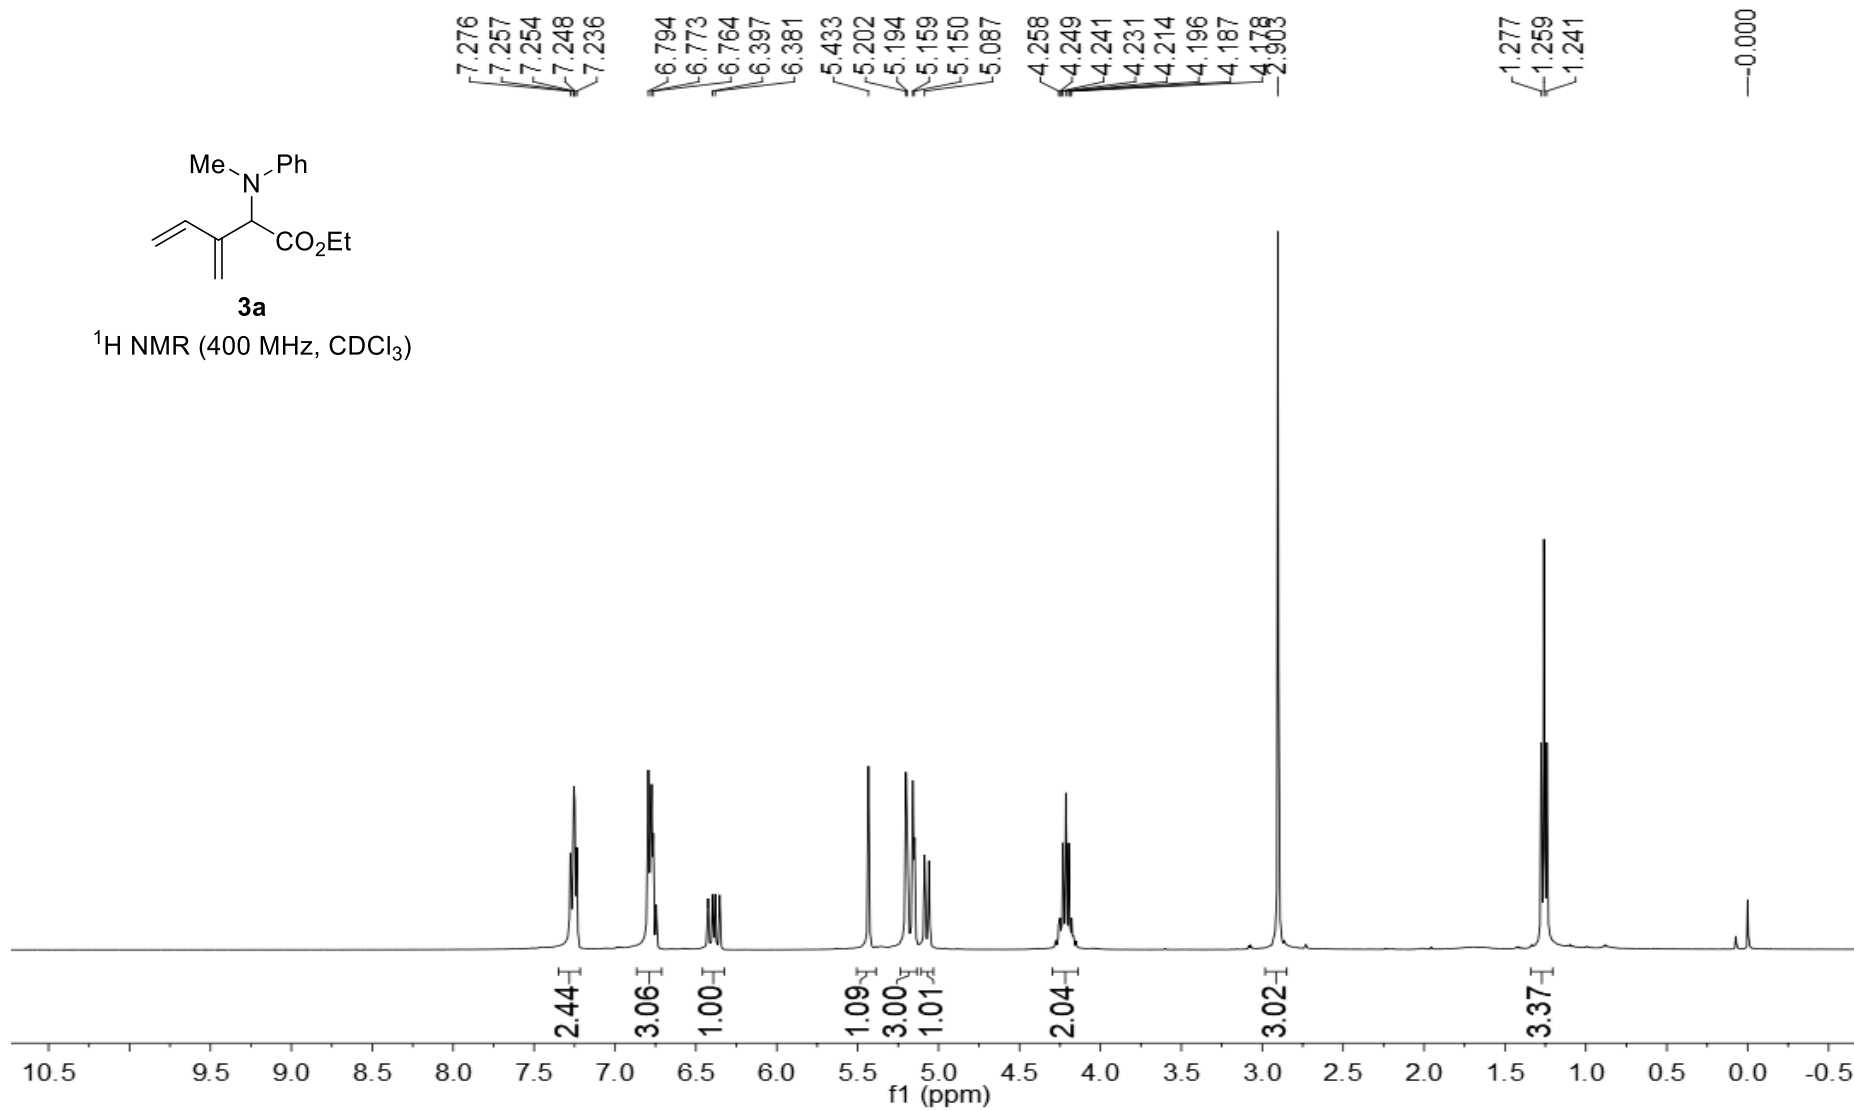

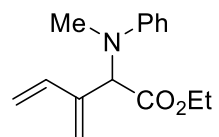

**3a**

<sup>13</sup>C NMR (100 MHz, CDCl<sub>3</sub>)

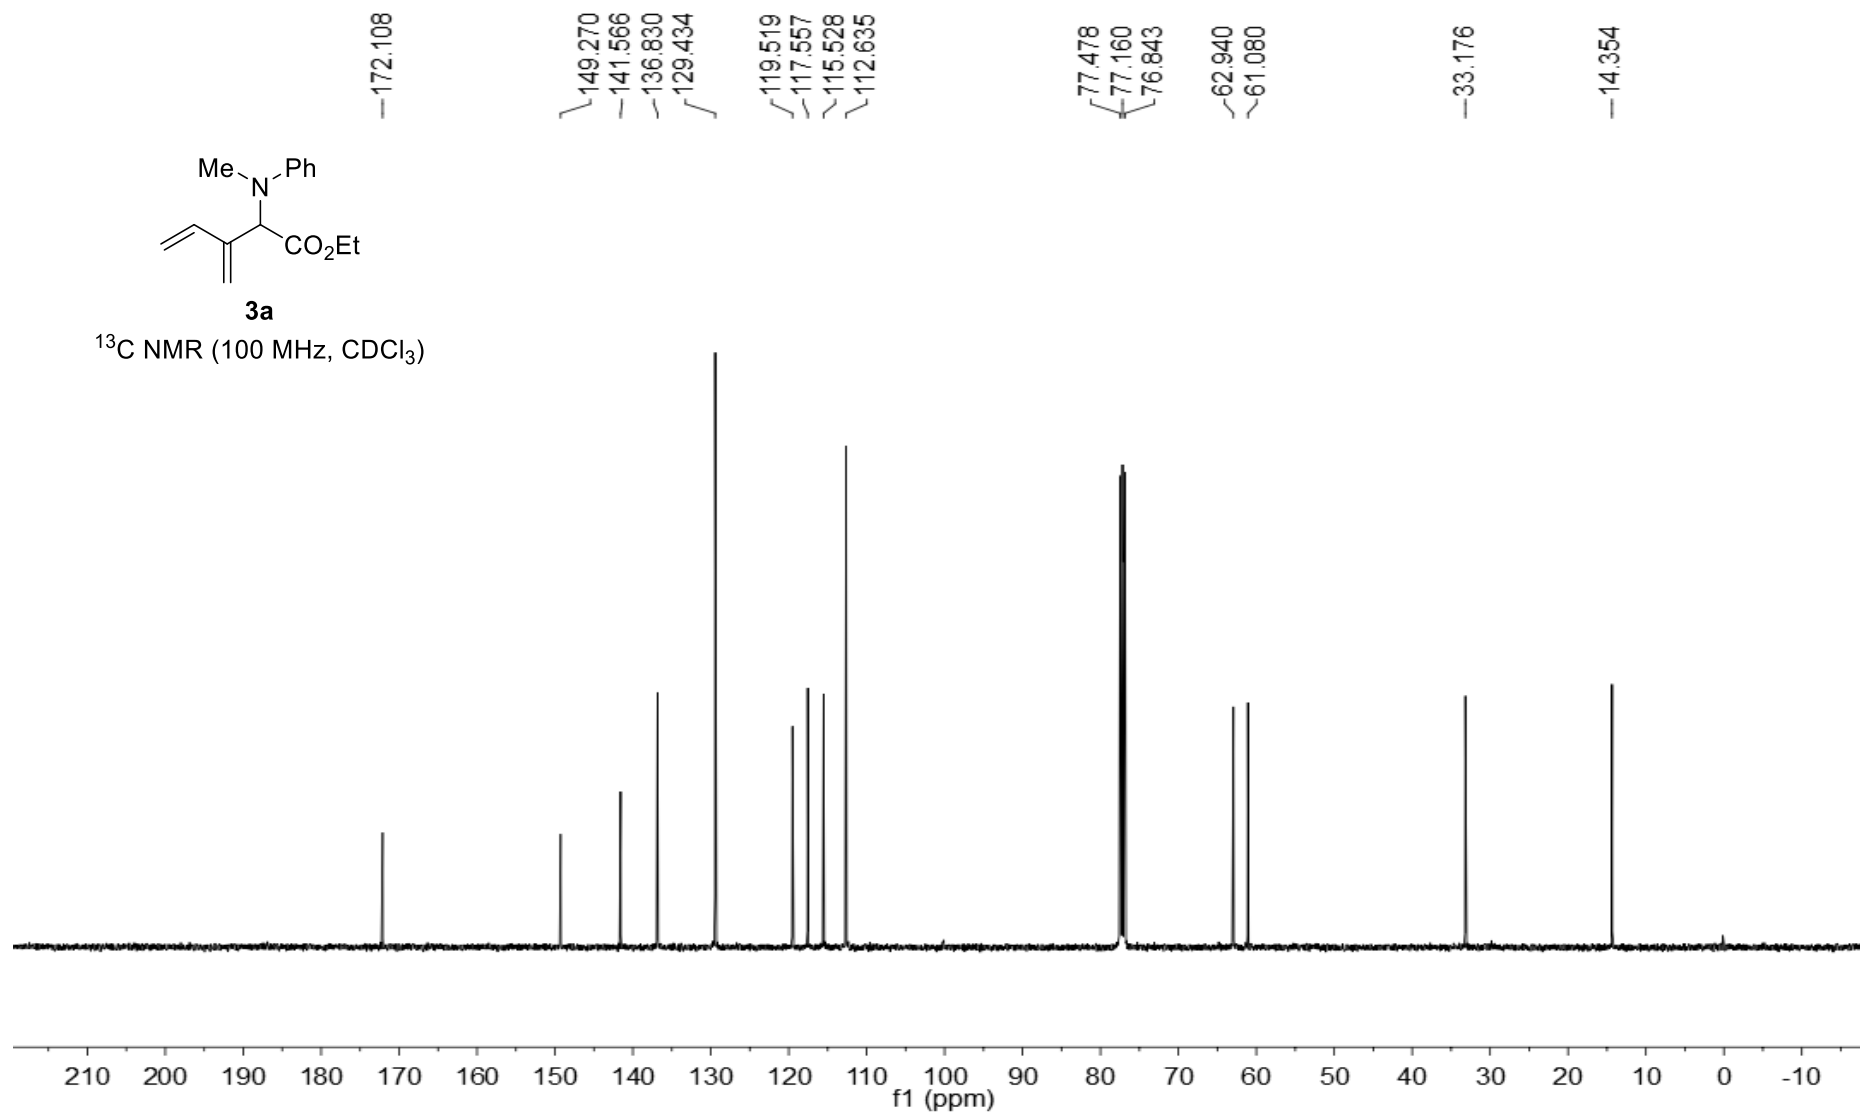

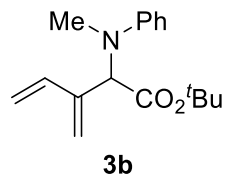

<sup>1</sup>H NMR (400 MHz, CDCl<sub>3</sub>)

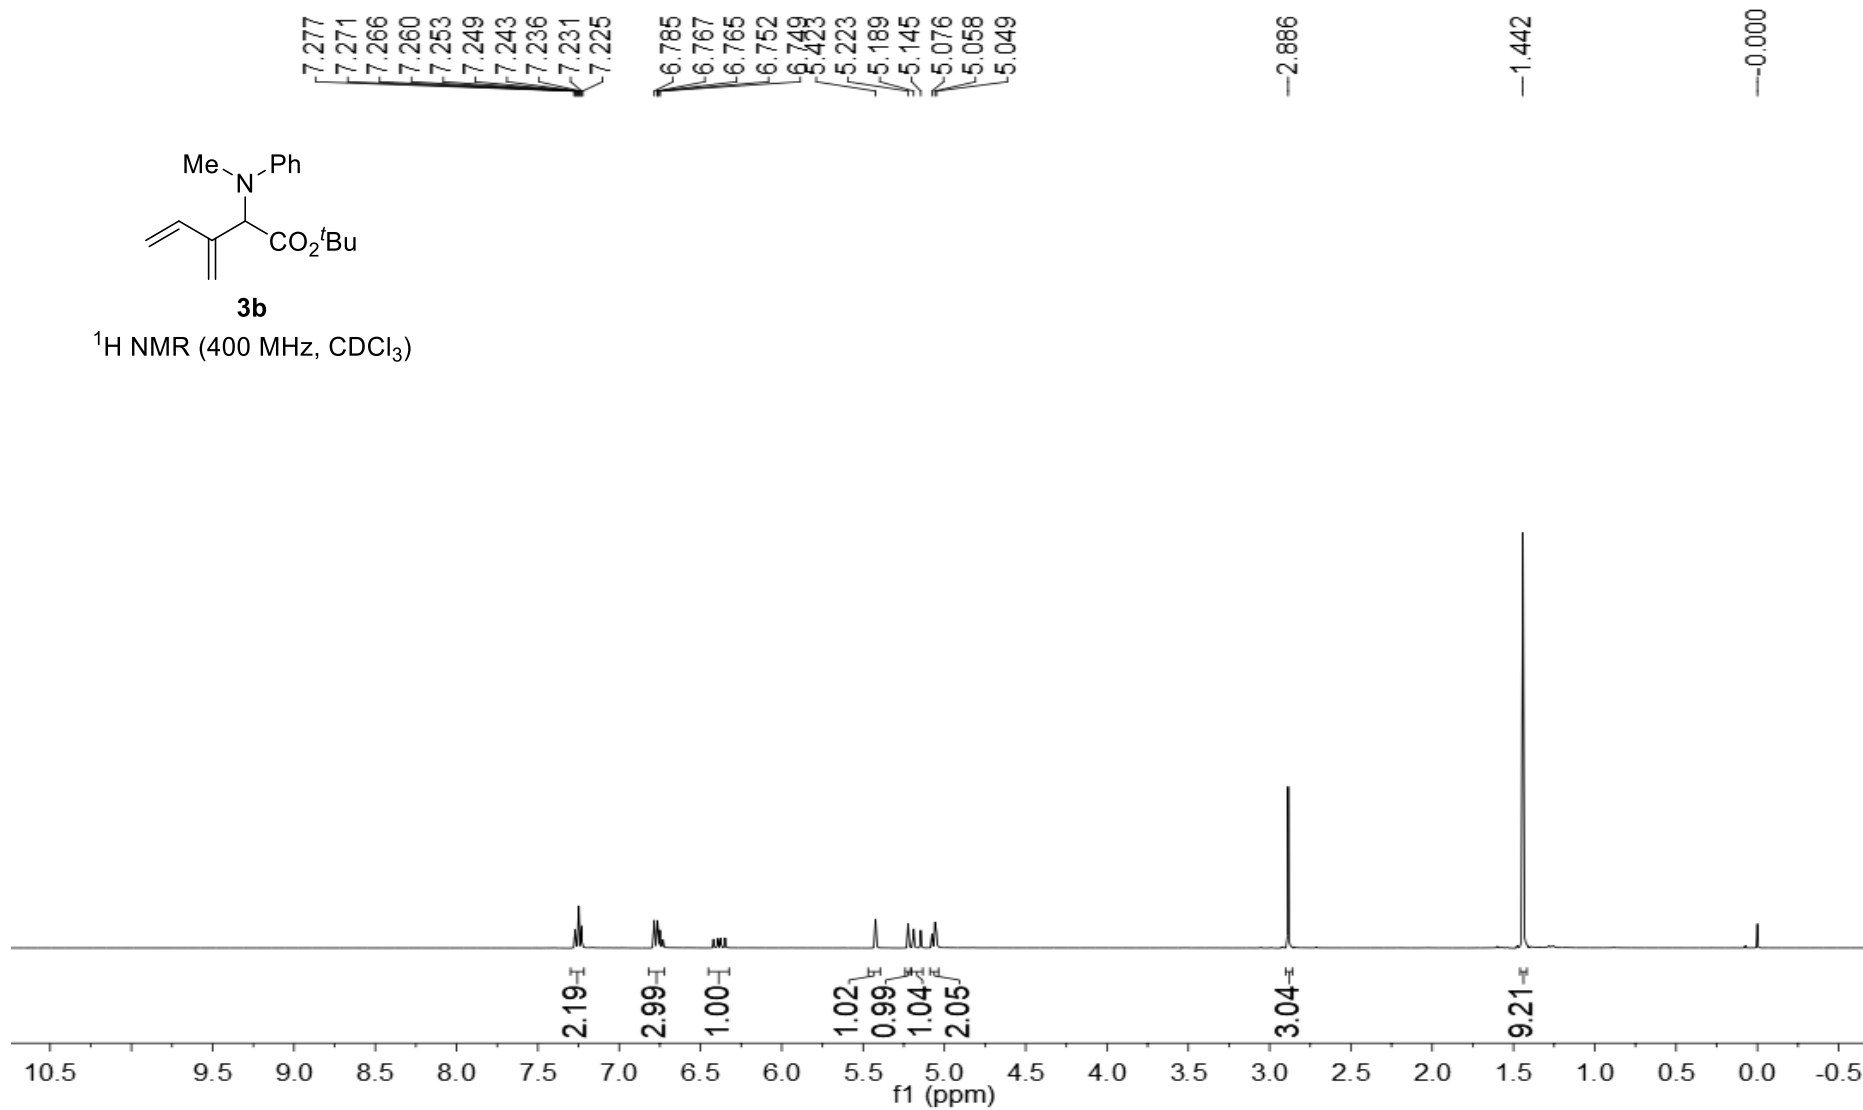



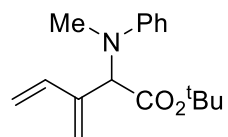

**3b**

<sup>13</sup>C NMR (100 MHz, CDCl<sub>3</sub>)

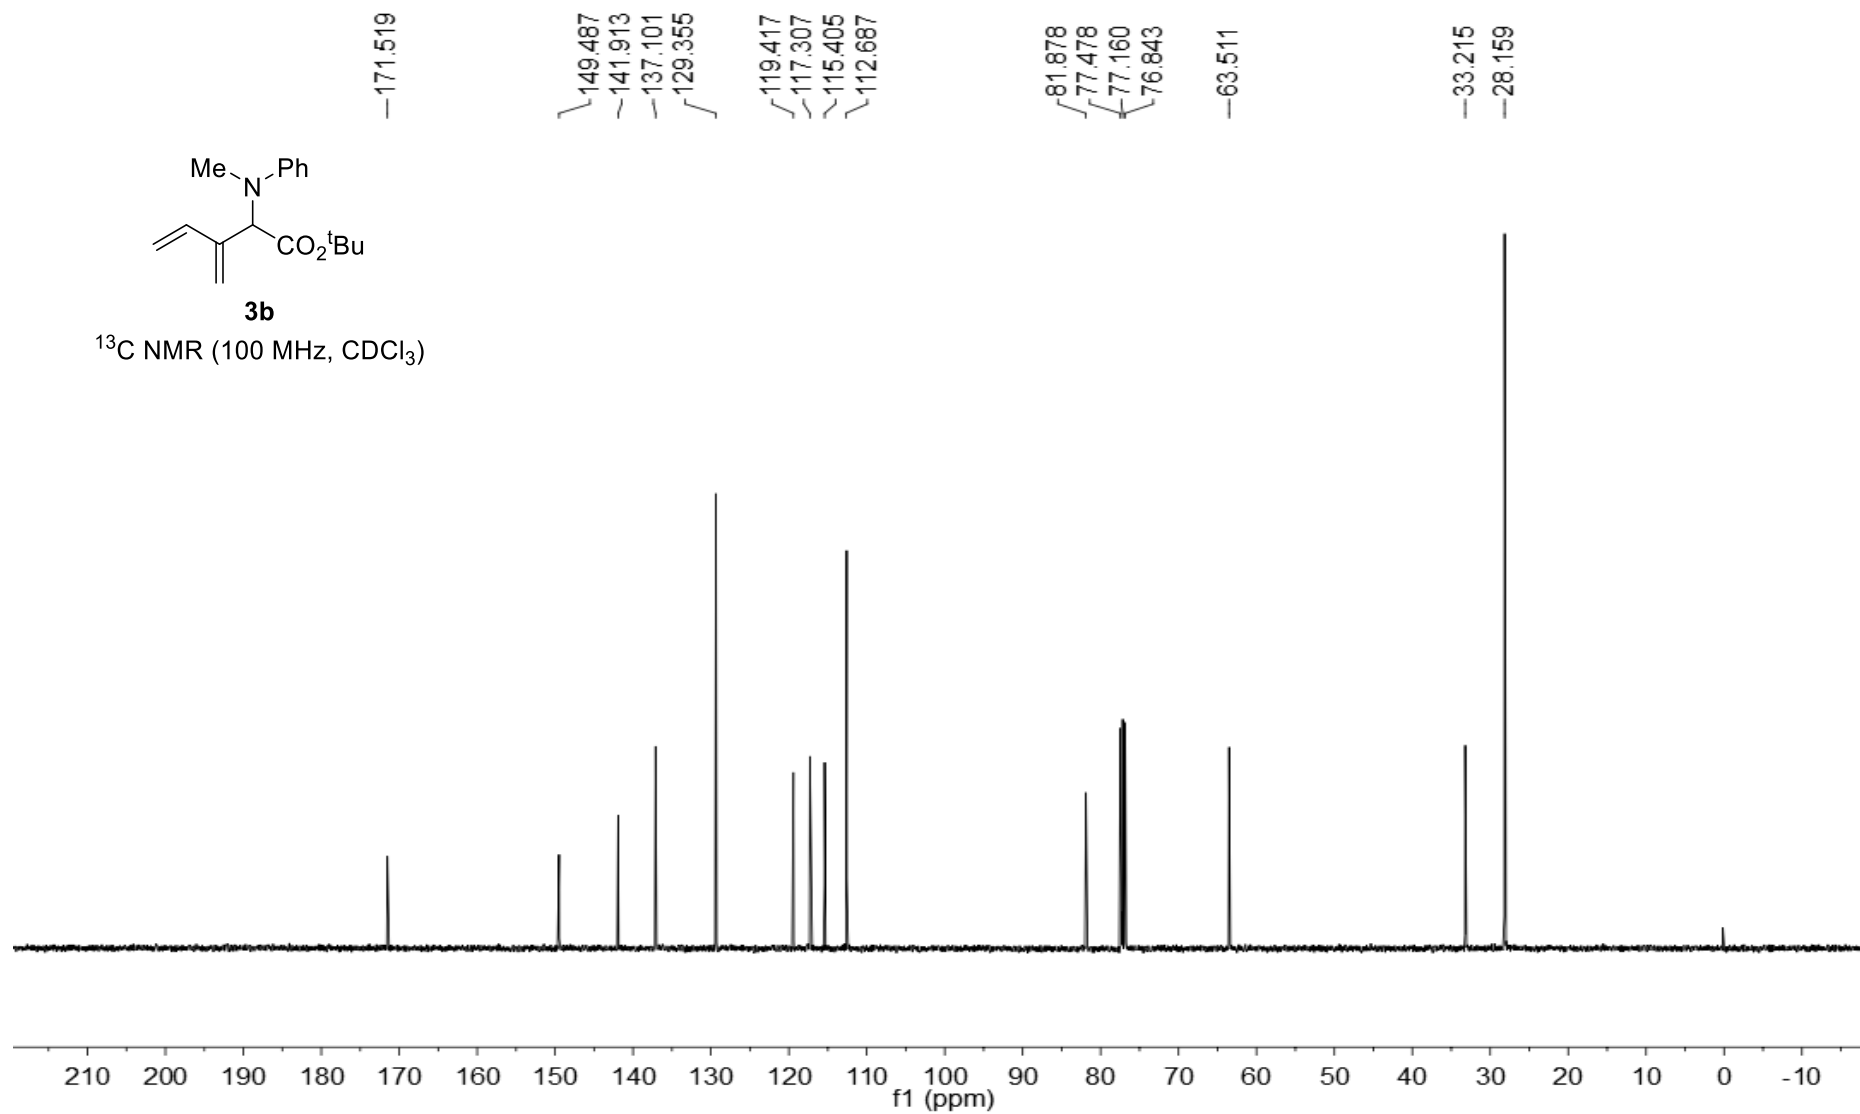

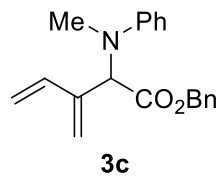

<sup>1</sup>H NMR (400 MHz, CDCl<sub>3</sub>)

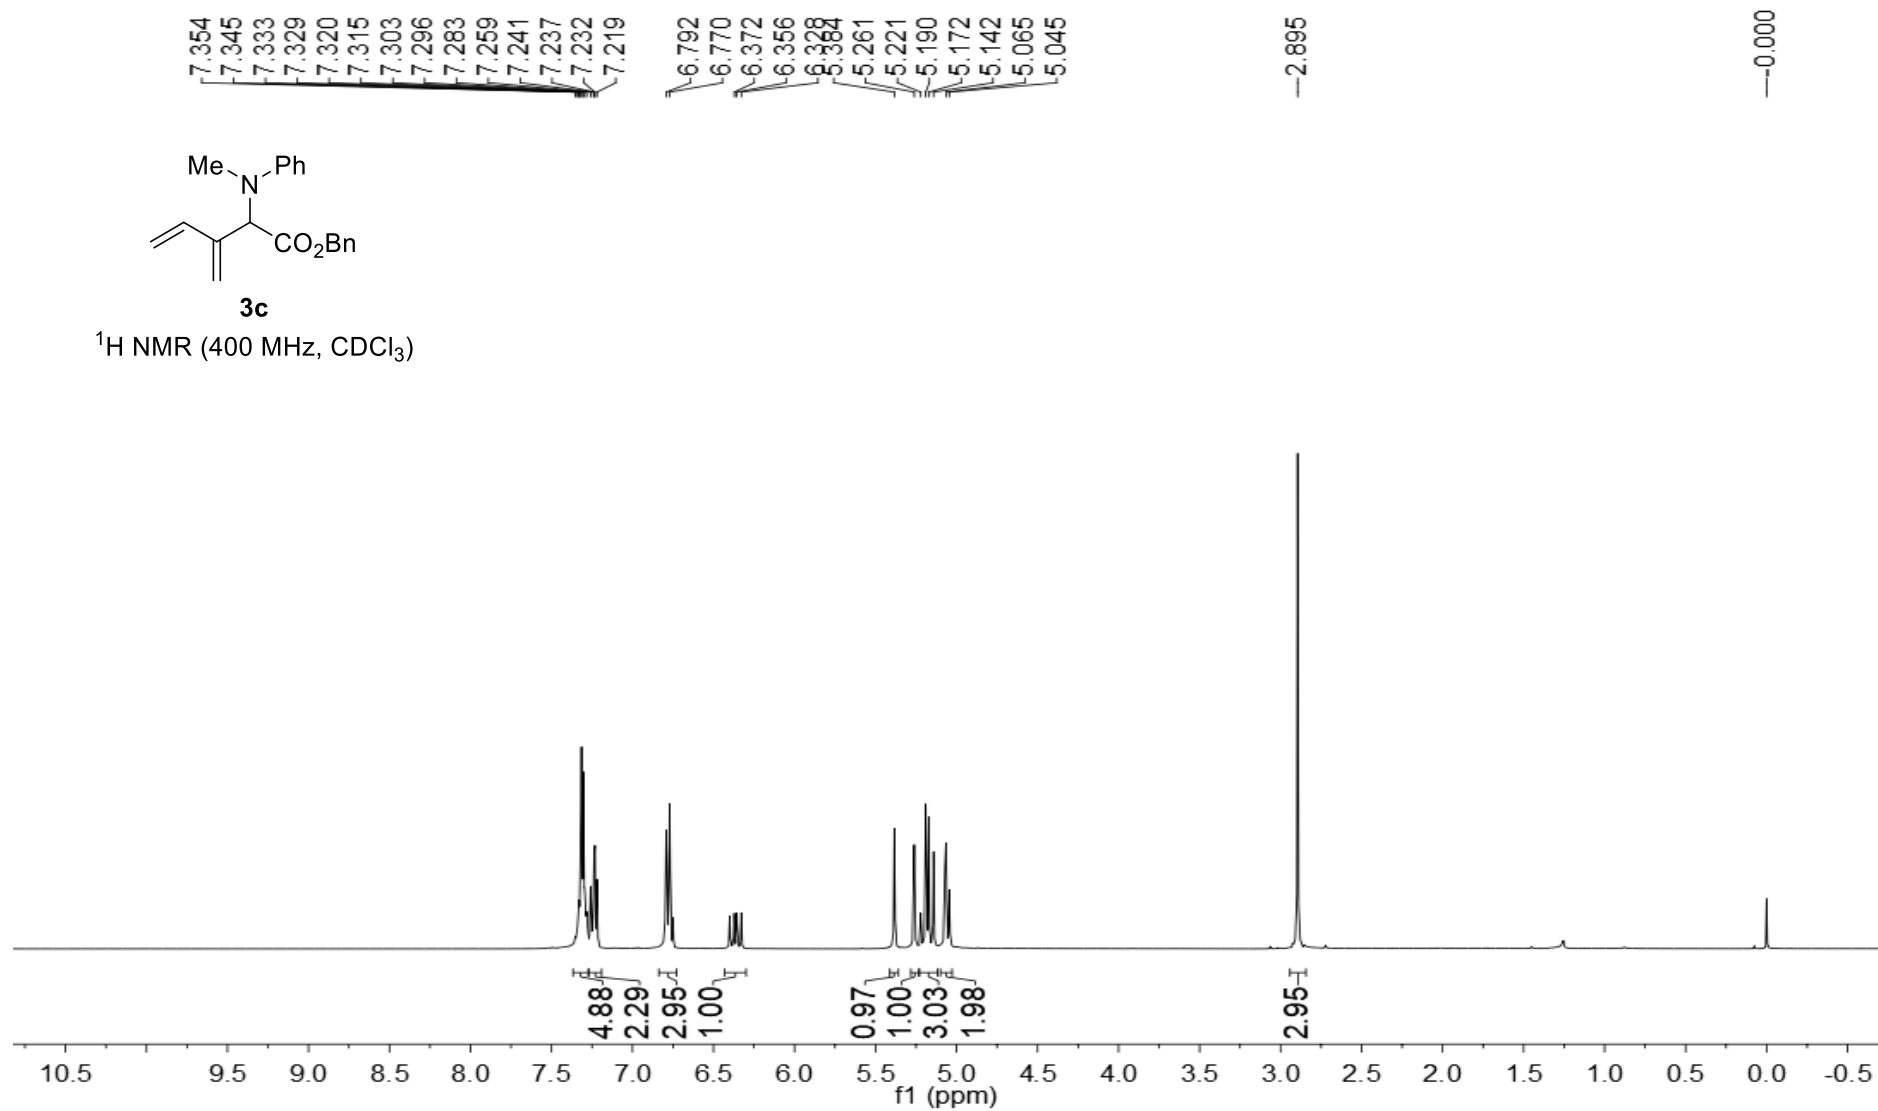

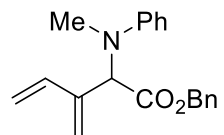

**3c**

<sup>13</sup>C NMR (100 MHz, CDCl<sub>3</sub>)

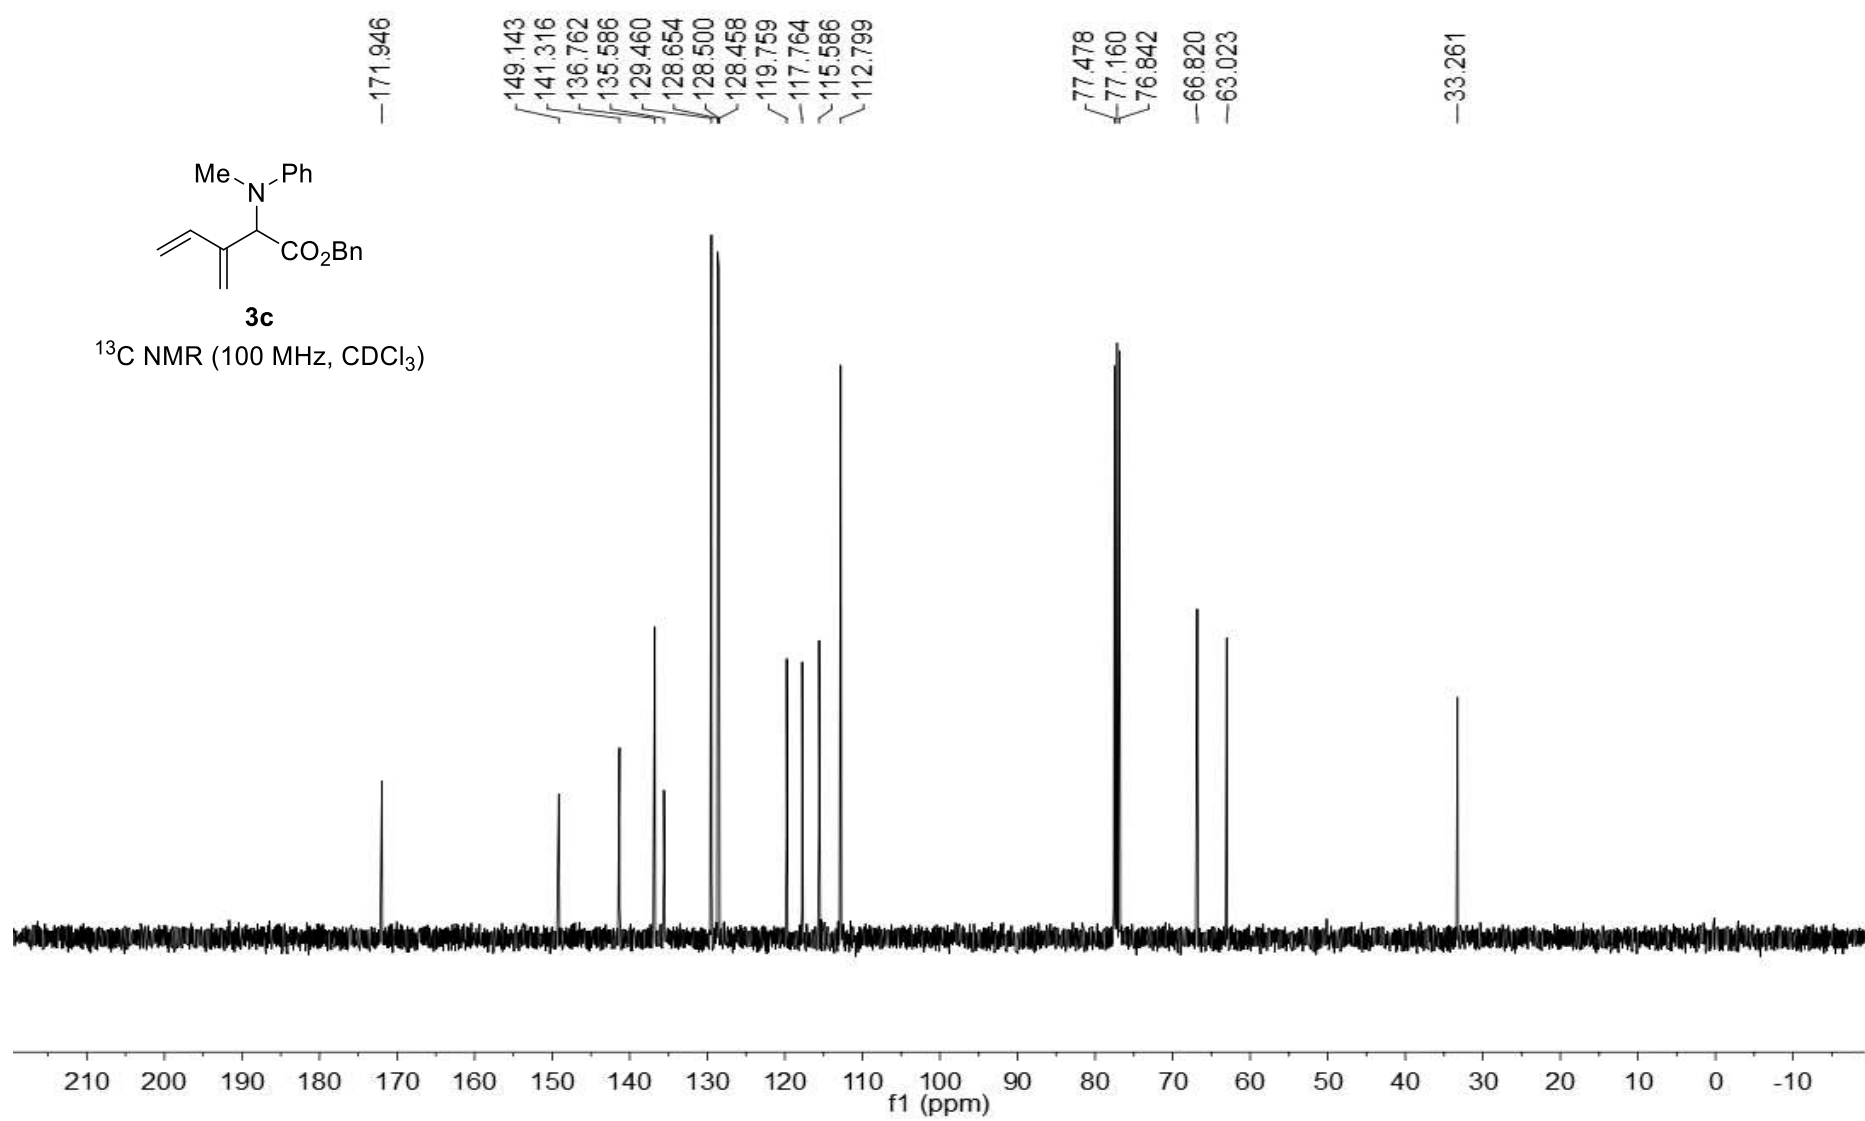

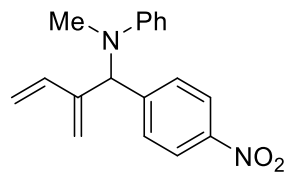

**3d**

<sup>1</sup>H NMR (400 MHz, CDCl<sub>3</sub>)

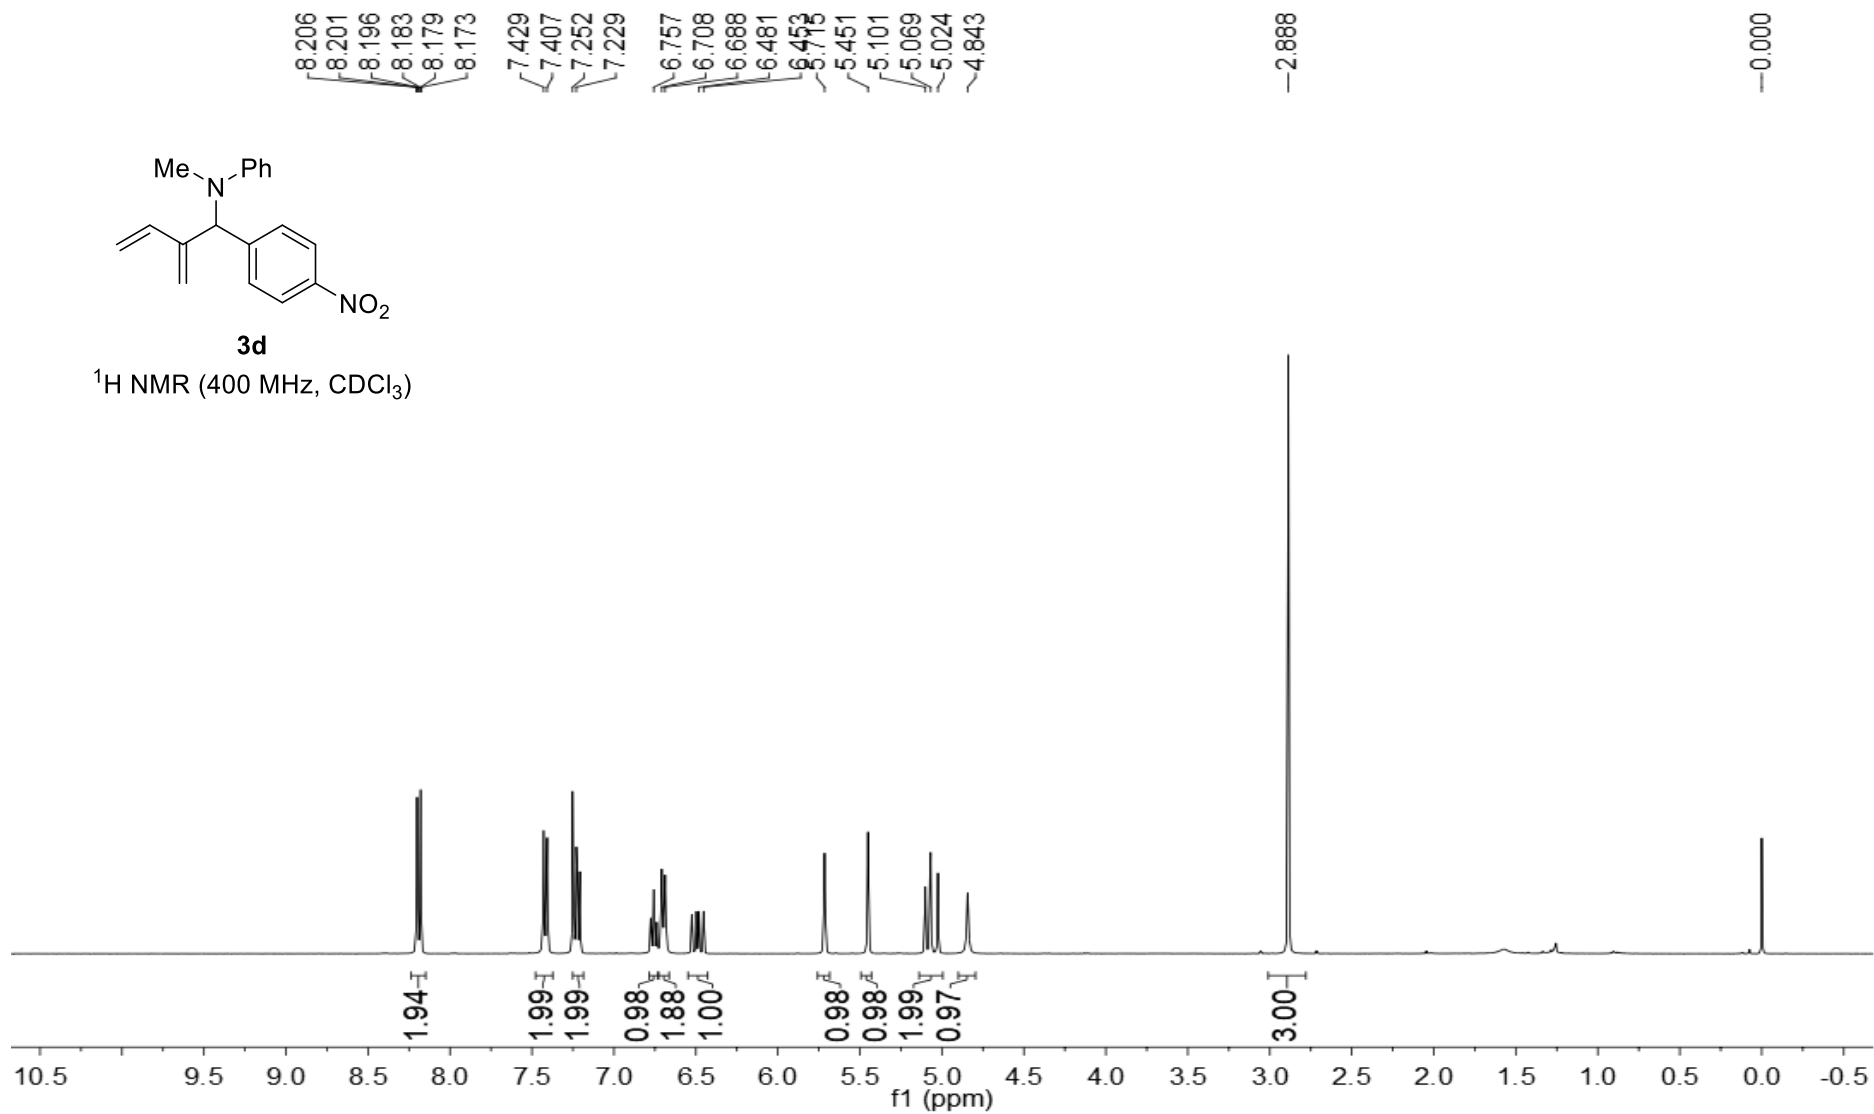

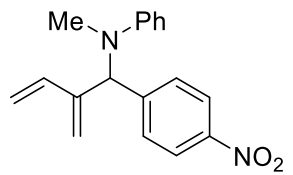

**3d**

<sup>13</sup>C NMR (100 MHz, CDCl<sub>3</sub>)

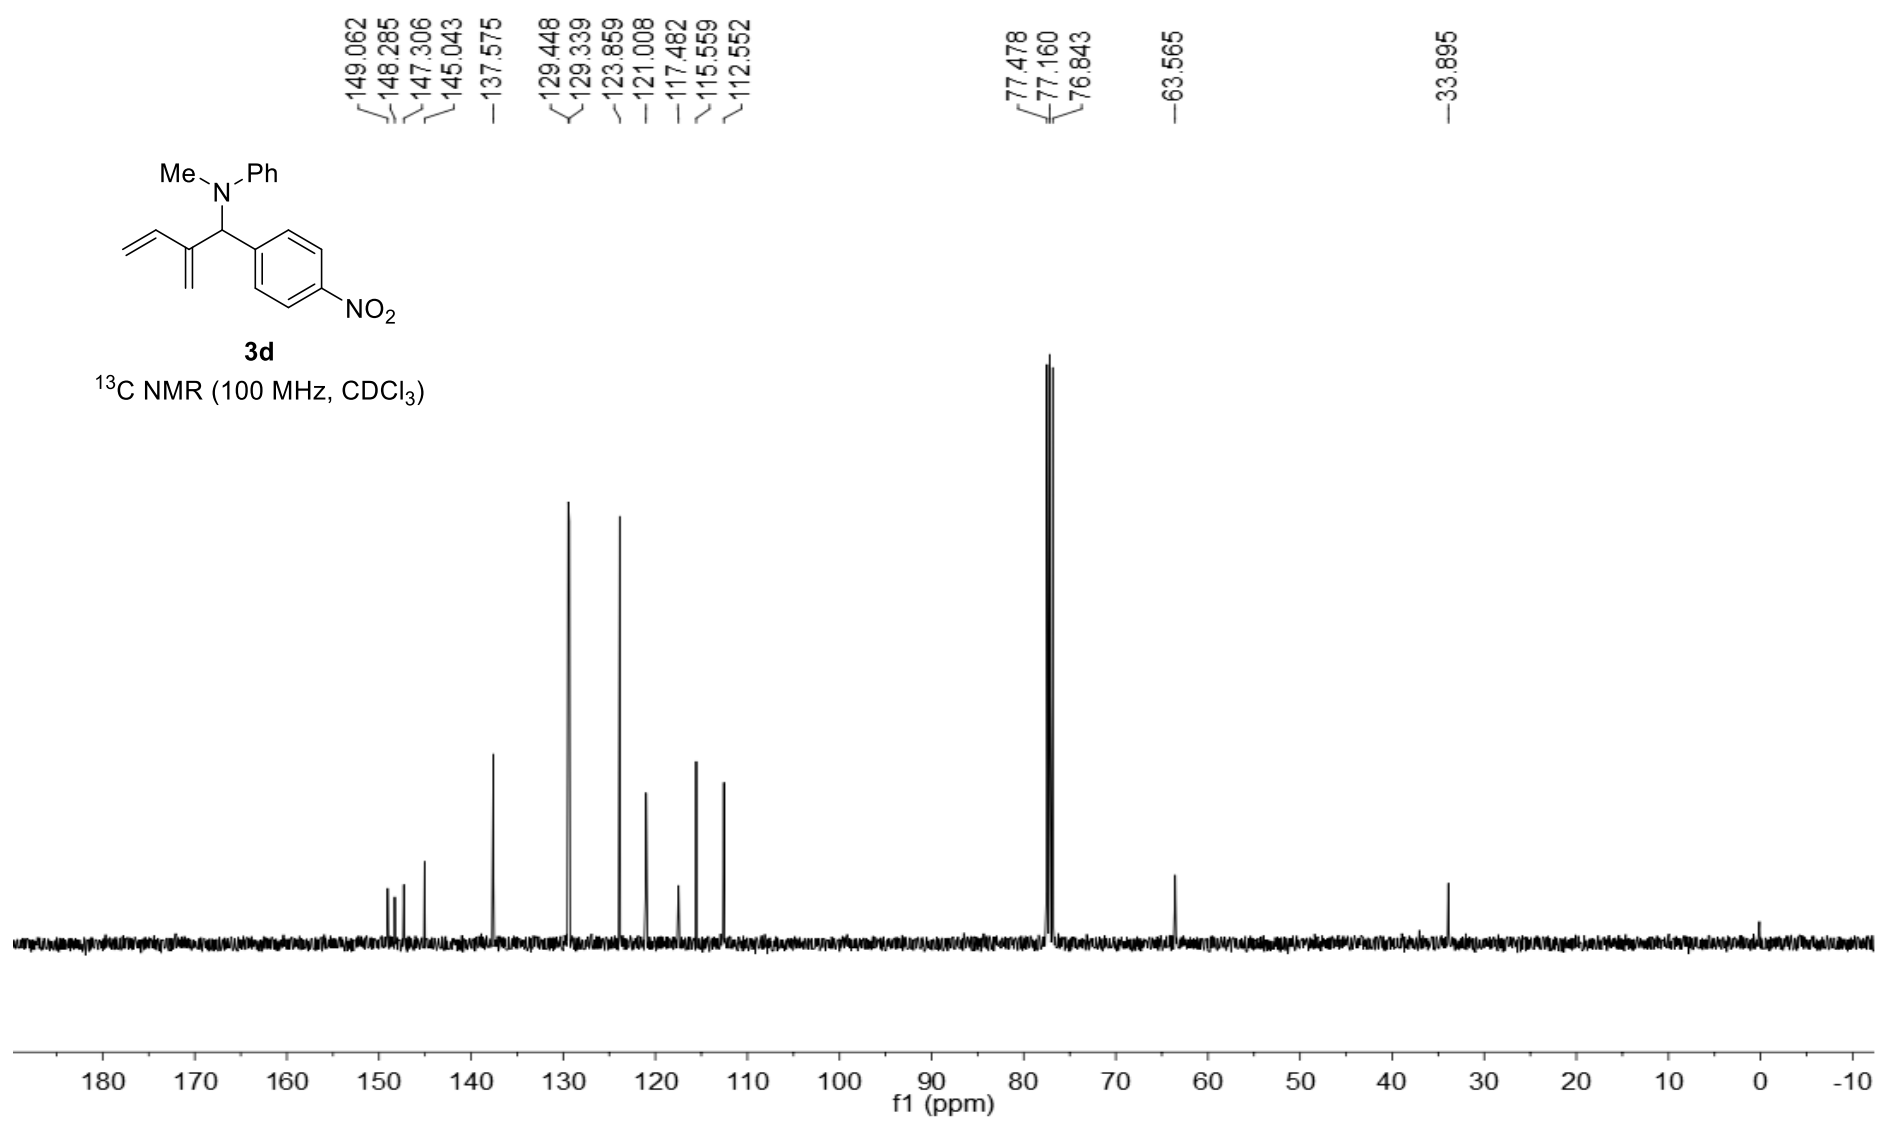

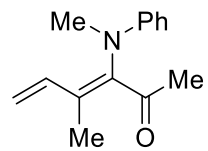

**3f'** (*>*99:1 *Z/E*)  
<sup>1</sup>H NMR (500 MHz, CDCl<sub>3</sub>)

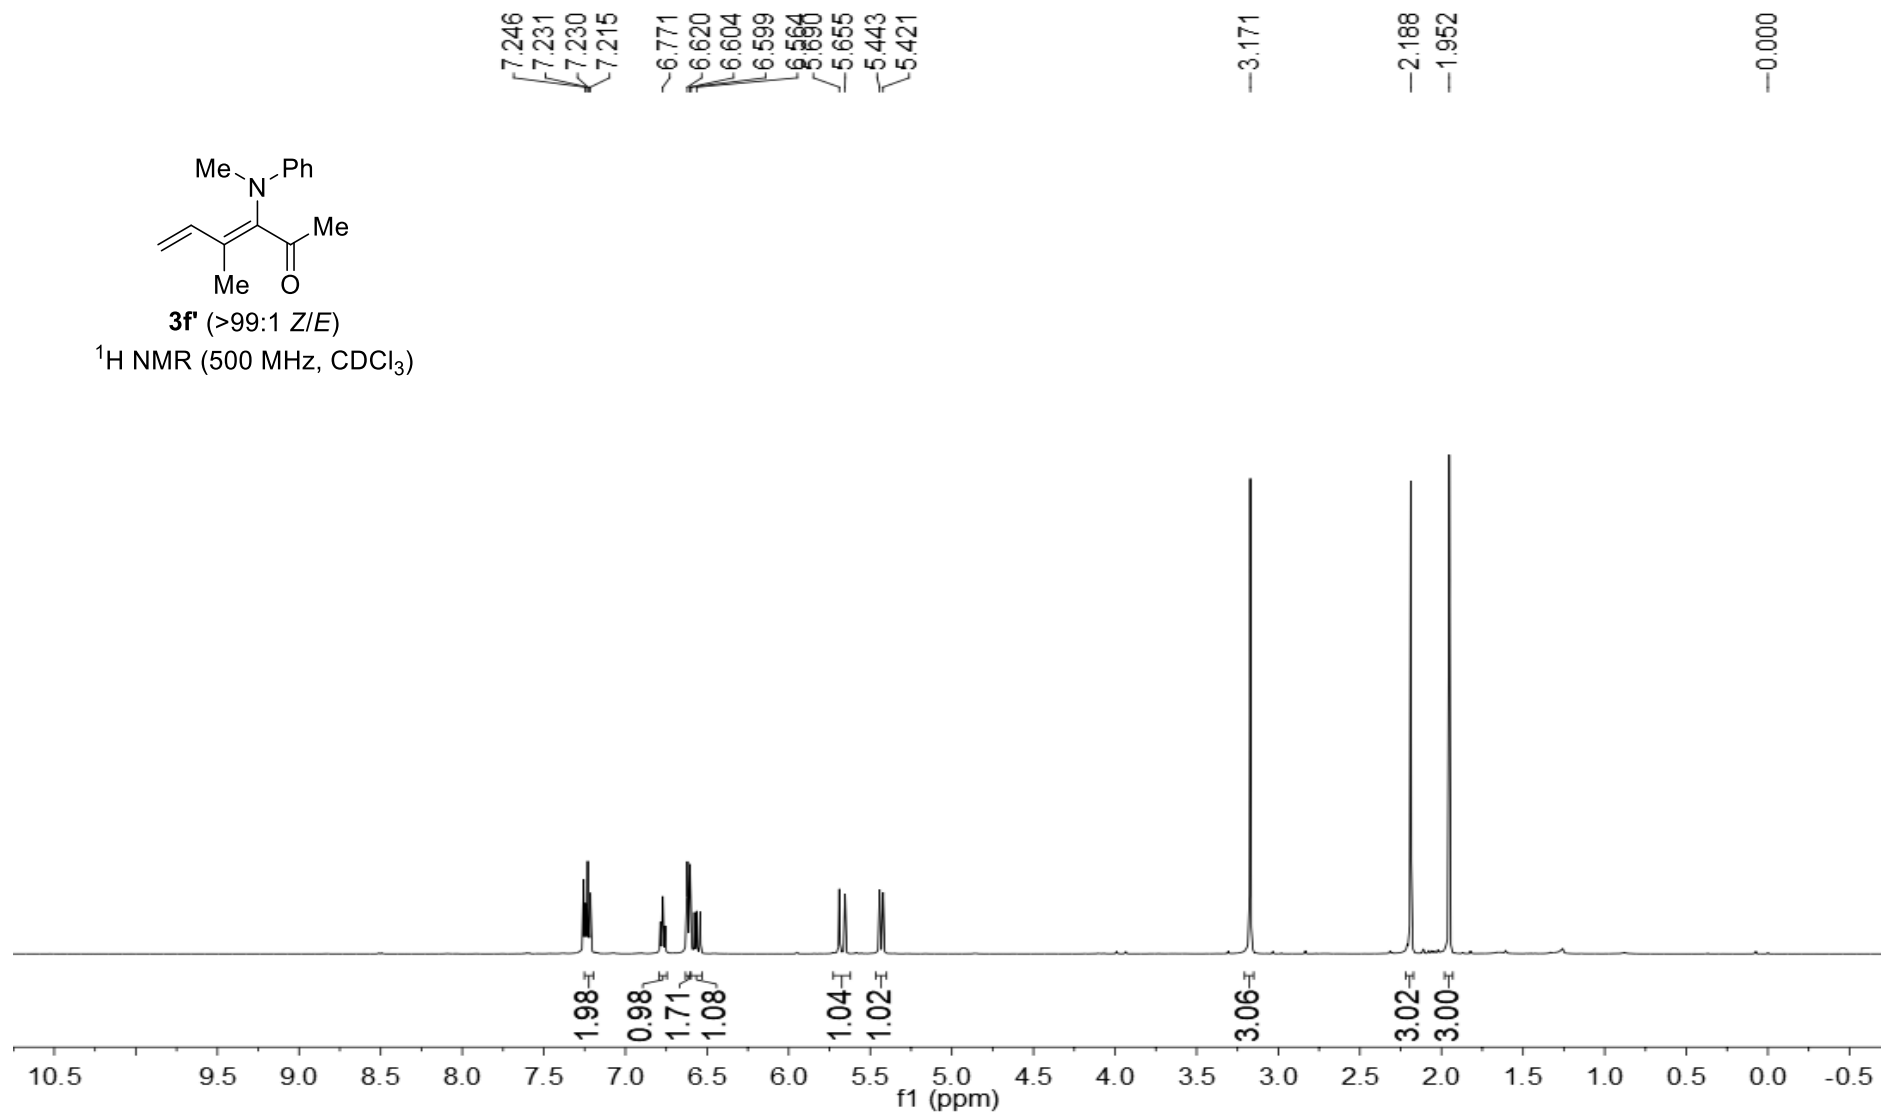

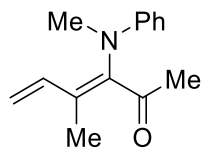

**3f'** (>99:1 Z/E)

<sup>13</sup>C NMR (125 MHz, CDCl<sub>3</sub>)

—202.195

~147.715

~140.997

~140.786

~135.589

~129.617

~121.182

~117.982

~112.533

77.414

77.160

76.906

—39.631

—29.112

—13.861

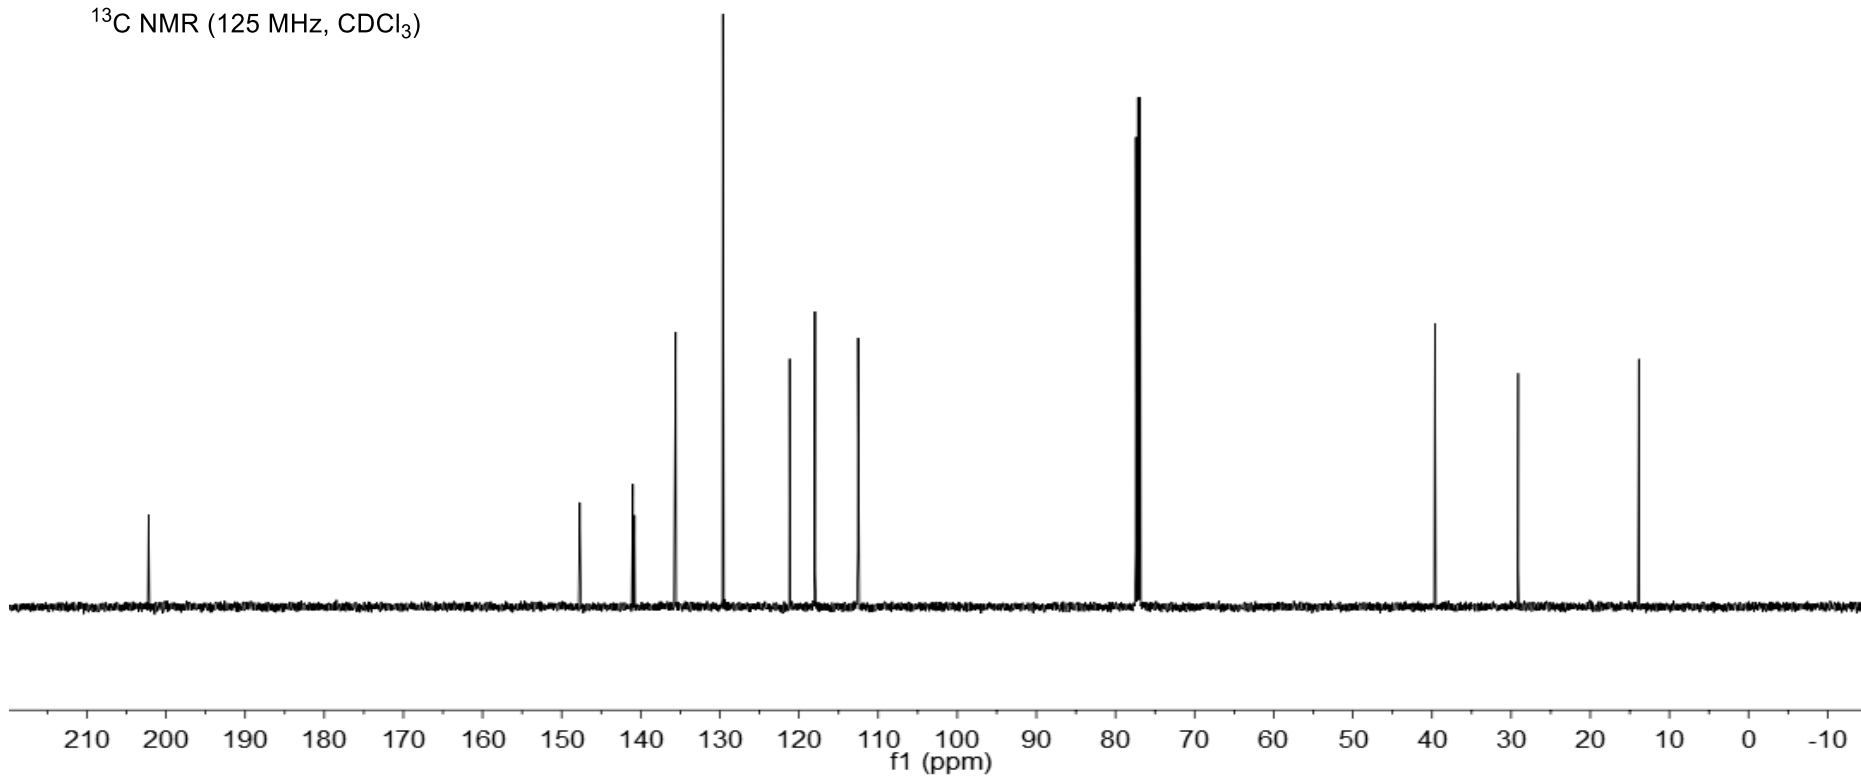

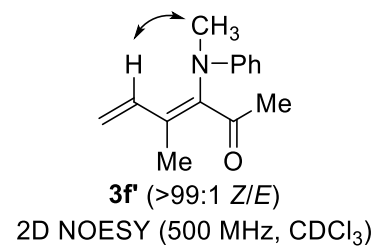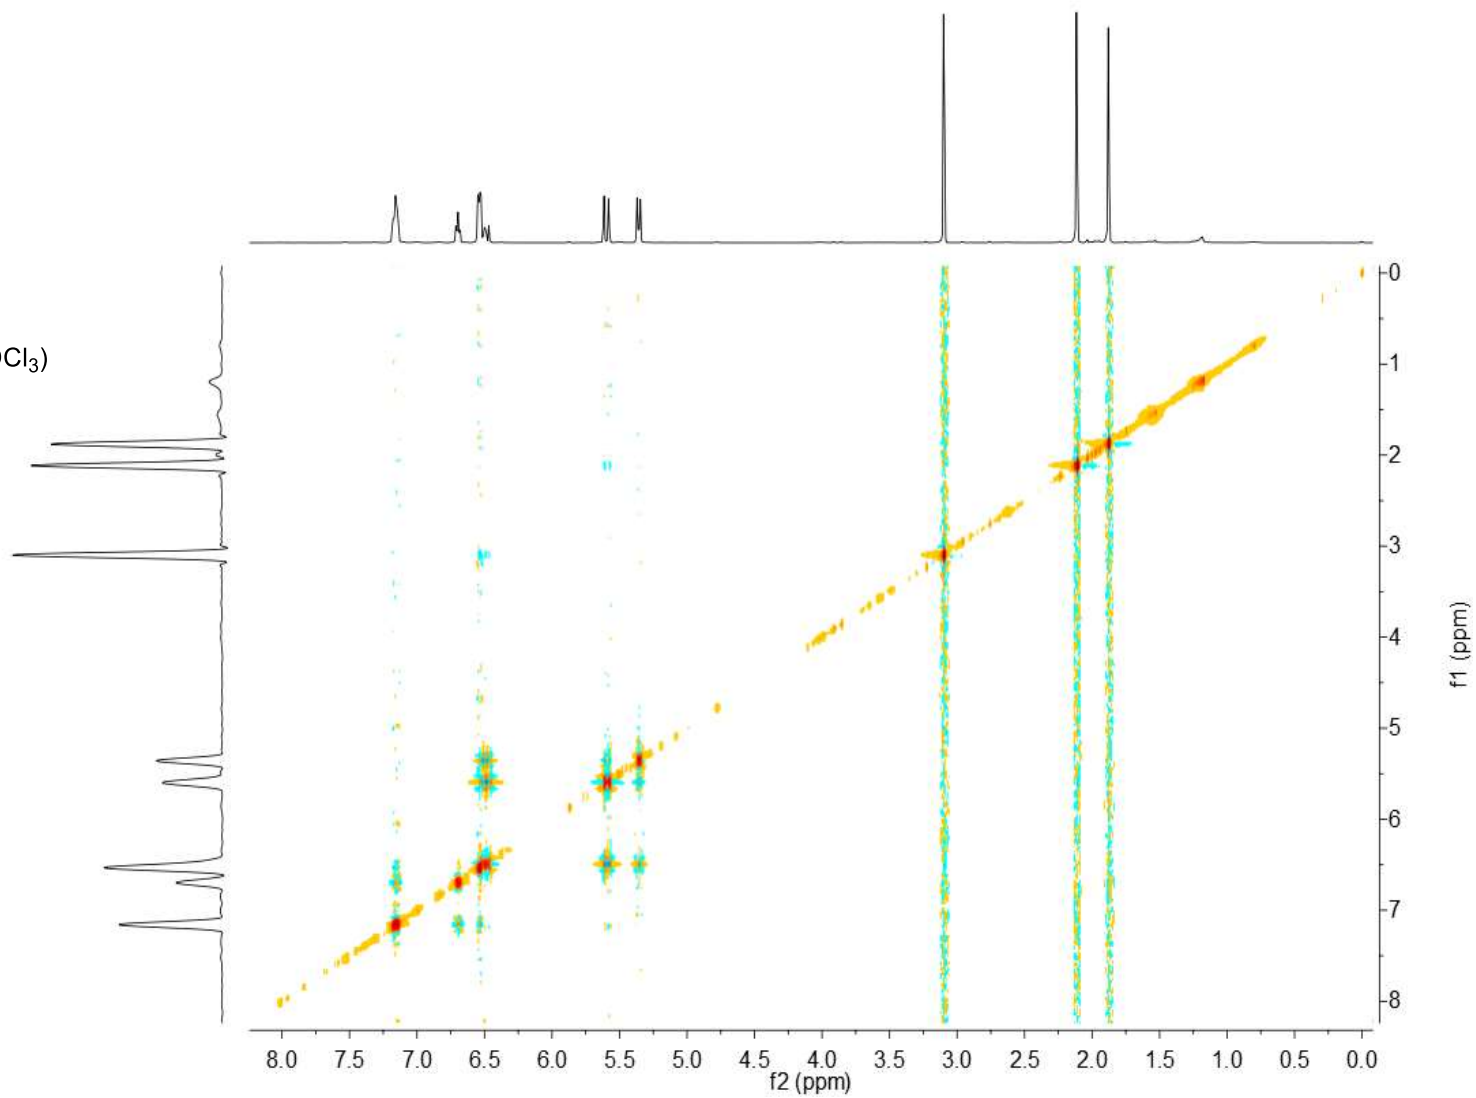



7.656  
7.638  
7.634  
7.474  
7.456  
7.437  
7.361  
7.341  
7.323  
7.249  
7.157  
7.139  
7.135  
7.117  
6.775  
6.747  
6.731  
6.716  
6.704  
6.698  
6.680  
6.678  
6.659  
5.587  
5.585  
5.543  
5.541  
5.385  
5.357  
5.356

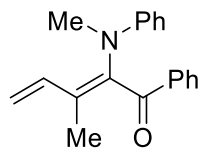

3g'

<sup>1</sup>H NMR (400 MHz, CDCl<sub>3</sub>)

-3.141

-1.966

-0.000

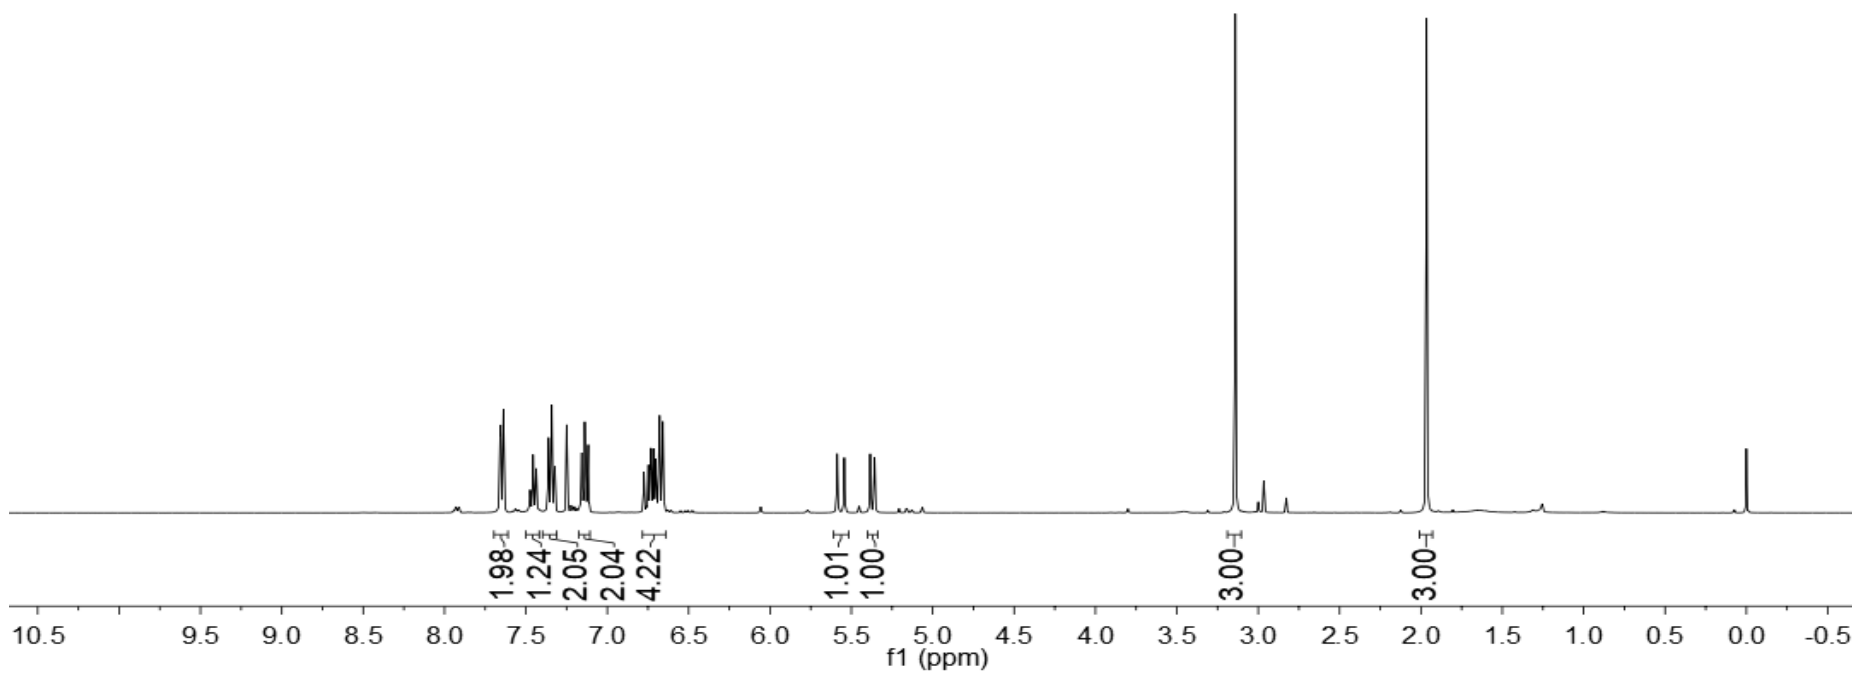

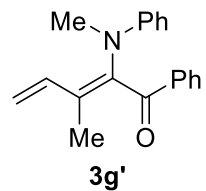

<sup>13</sup>C NMR (100 MHz, CDCl<sub>3</sub>)

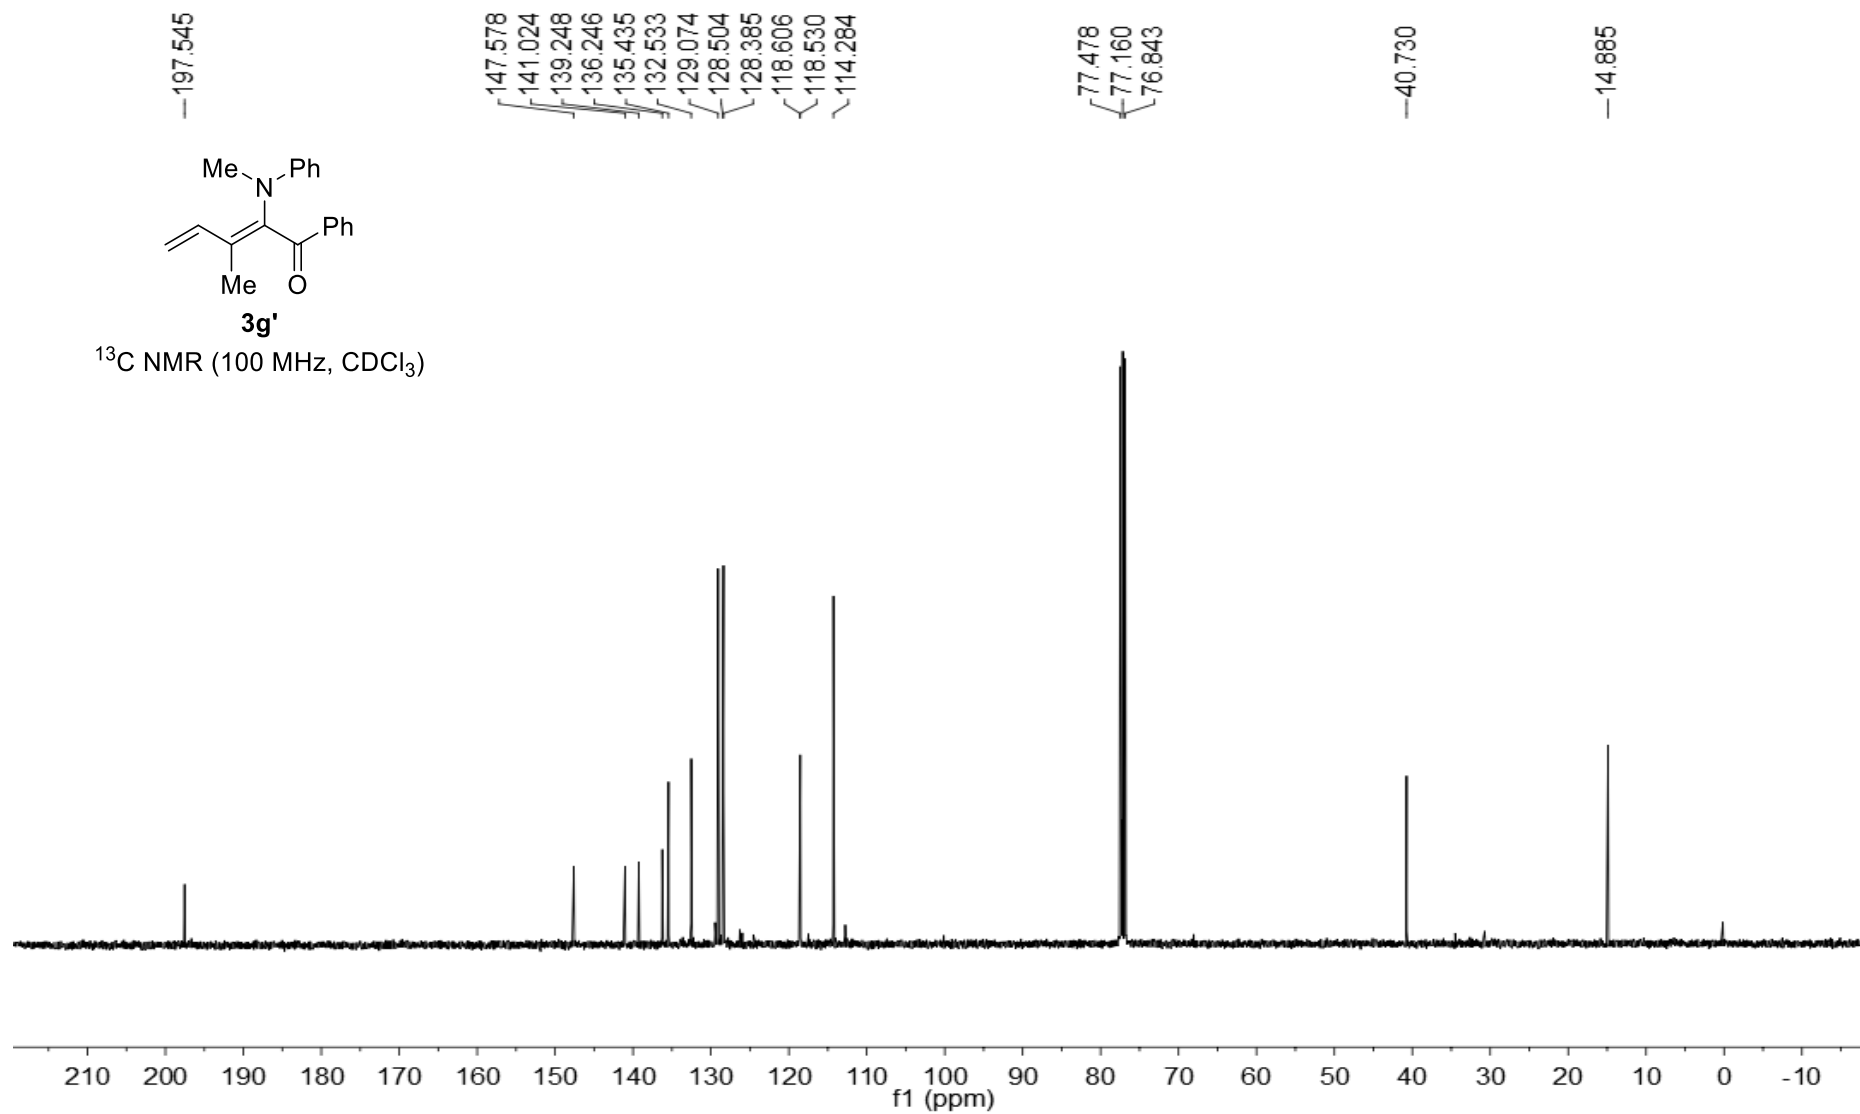

7.298  
7.293  
7.280  
7.276  
7.271  
7.263  
7.258  
7.253  
7.246  
7.074  
7.047  
7.031  
7.004  
6.905  
6.886  
6.868  
6.851  
6.824  
6.807  
6.780  
6.753  
6.751  
6.731  
5.707  
5.682  
5.664  
5.638  
5.567  
5.540  
5.475  
5.448

3.113  
3.079

2.230  
1.910

0.000

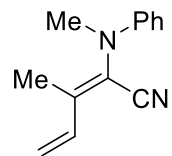

**3h'** (25:75 Z/E)

<sup>1</sup>H NMR (400 MHz, CDCl<sub>3</sub>)

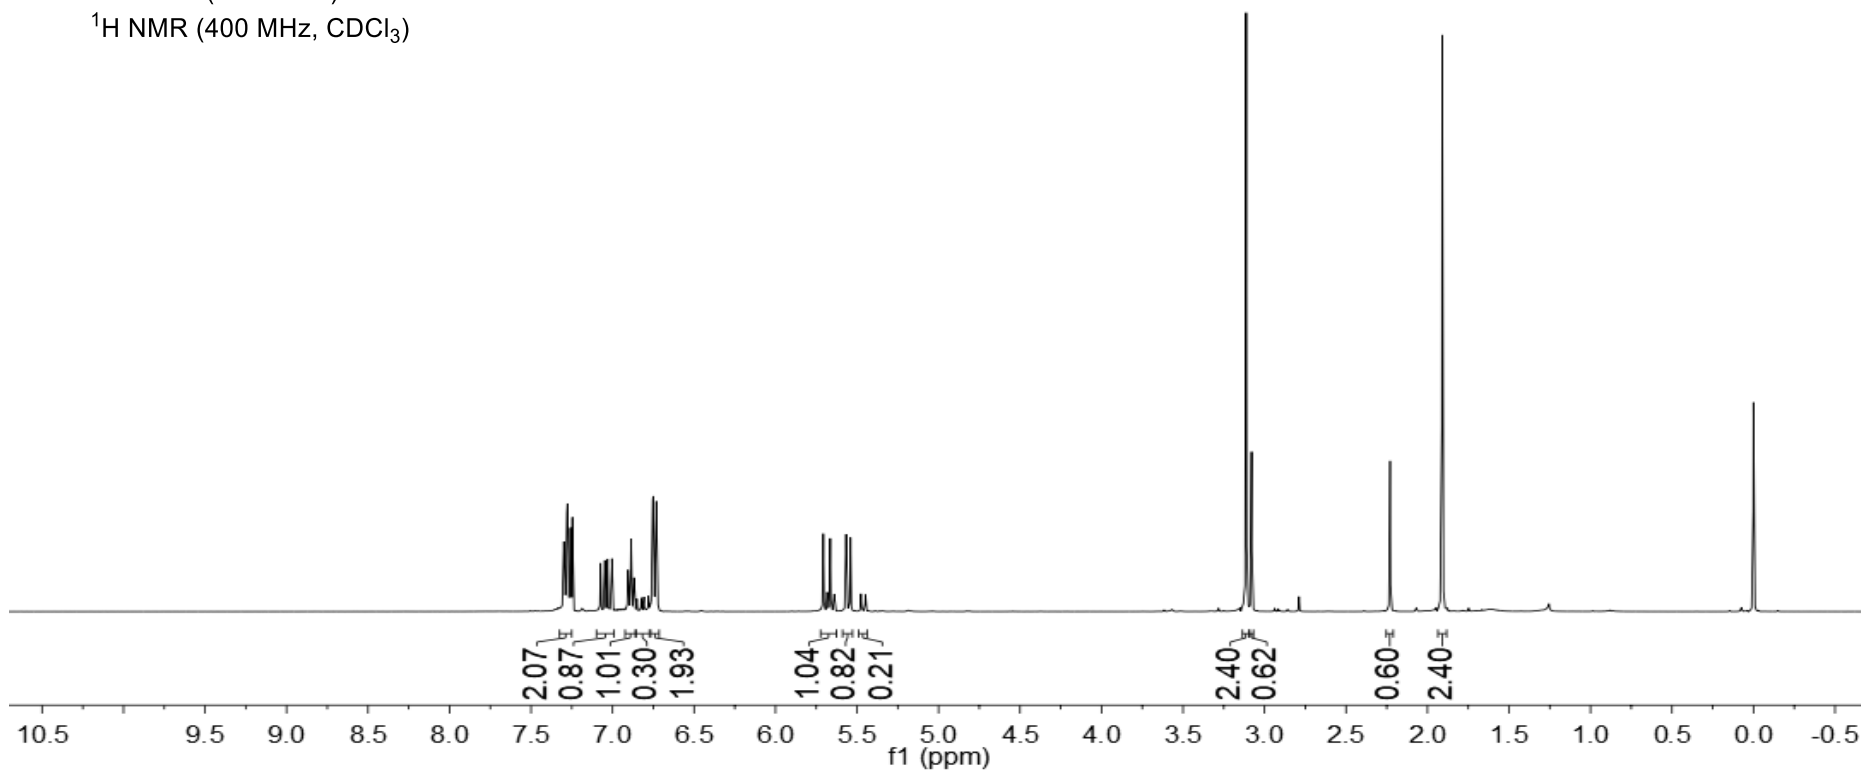

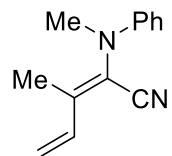

**3h'** (25:75 Z/E)  
<sup>13</sup>C NMR (100 MHz, CDCl<sub>3</sub>)

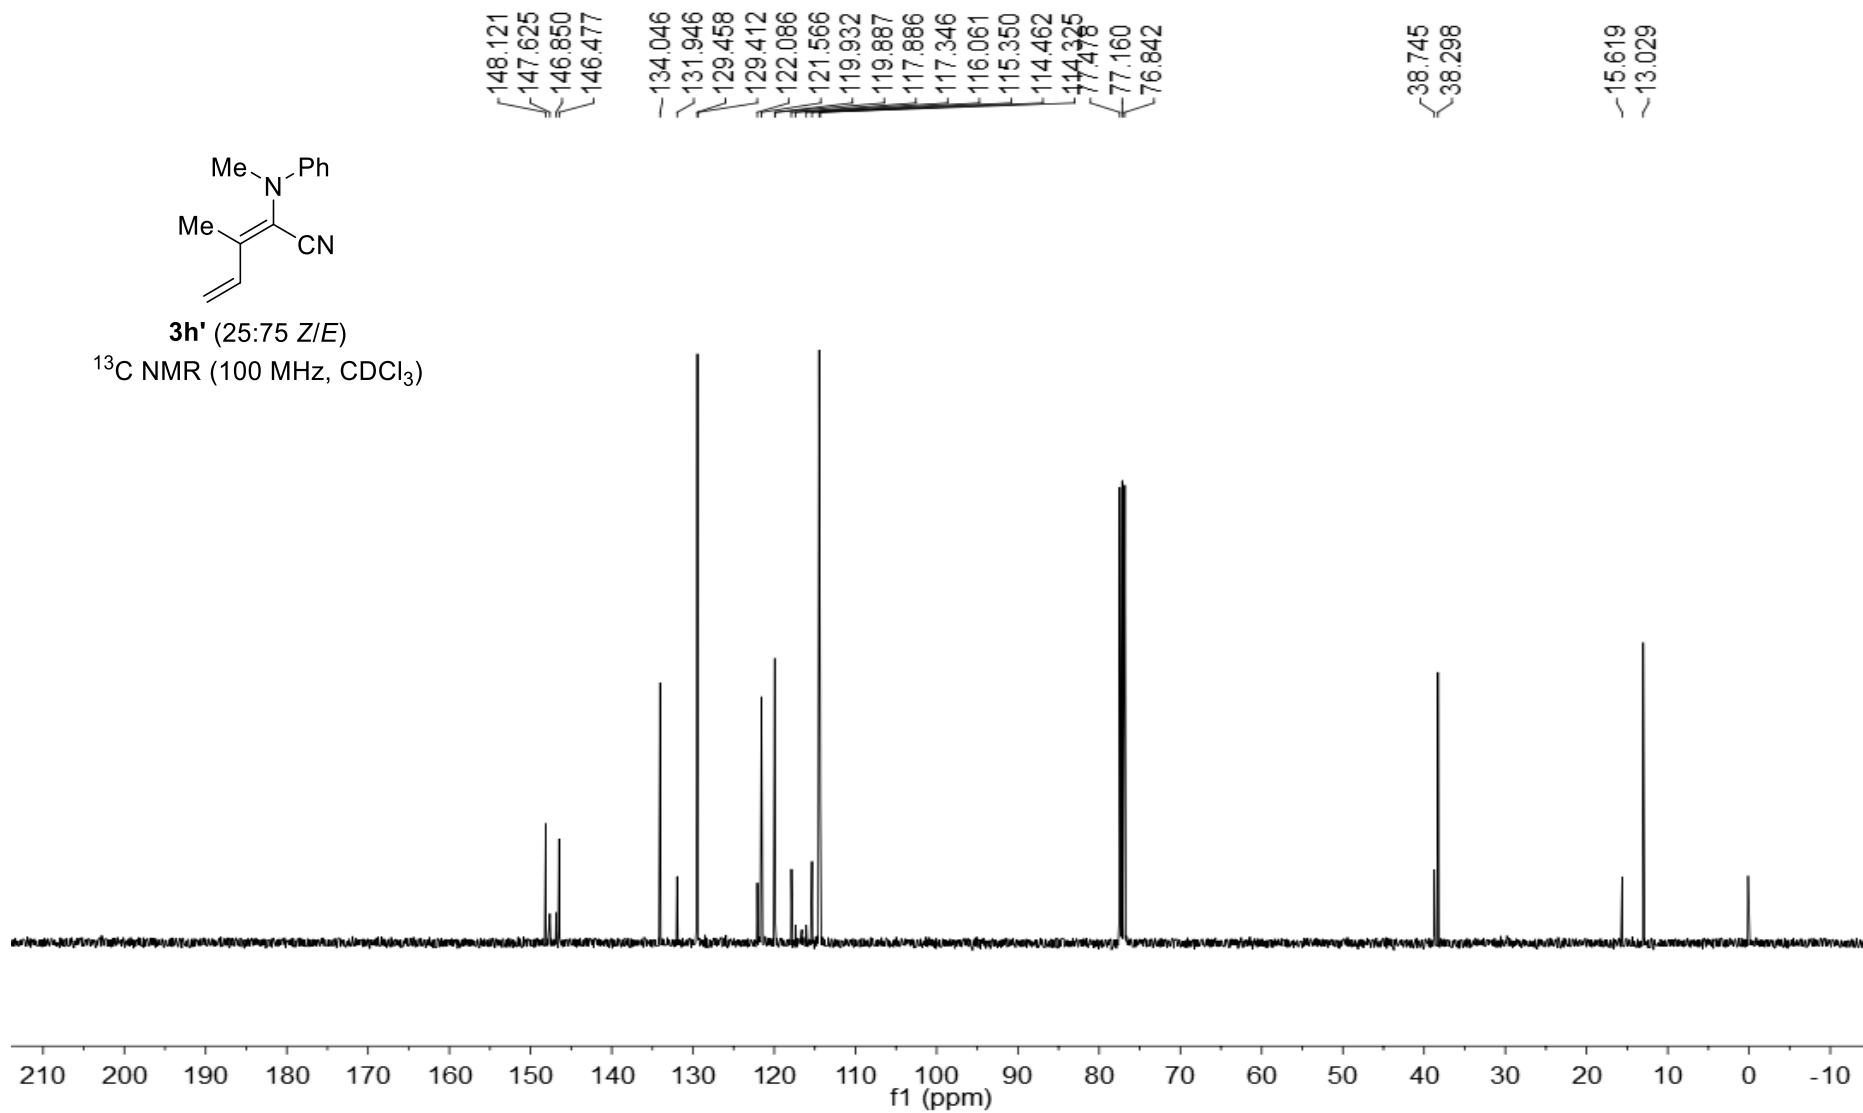

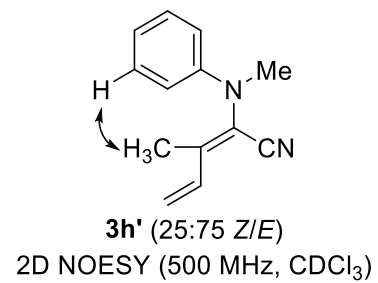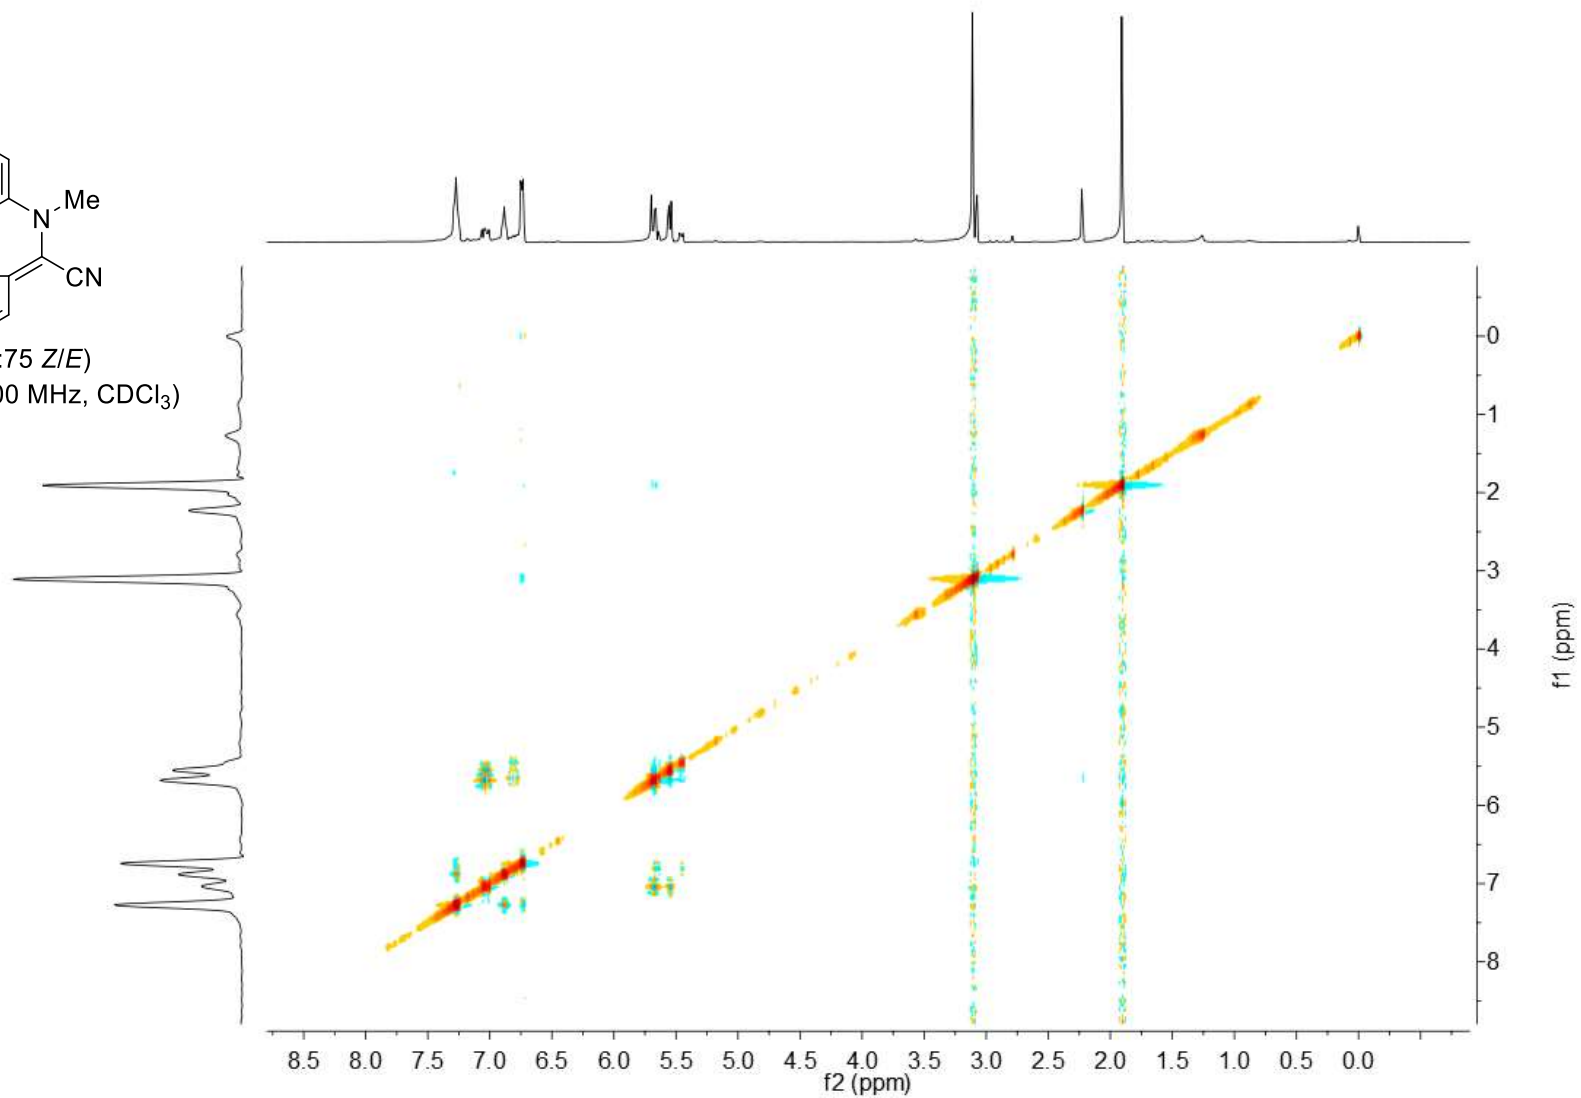

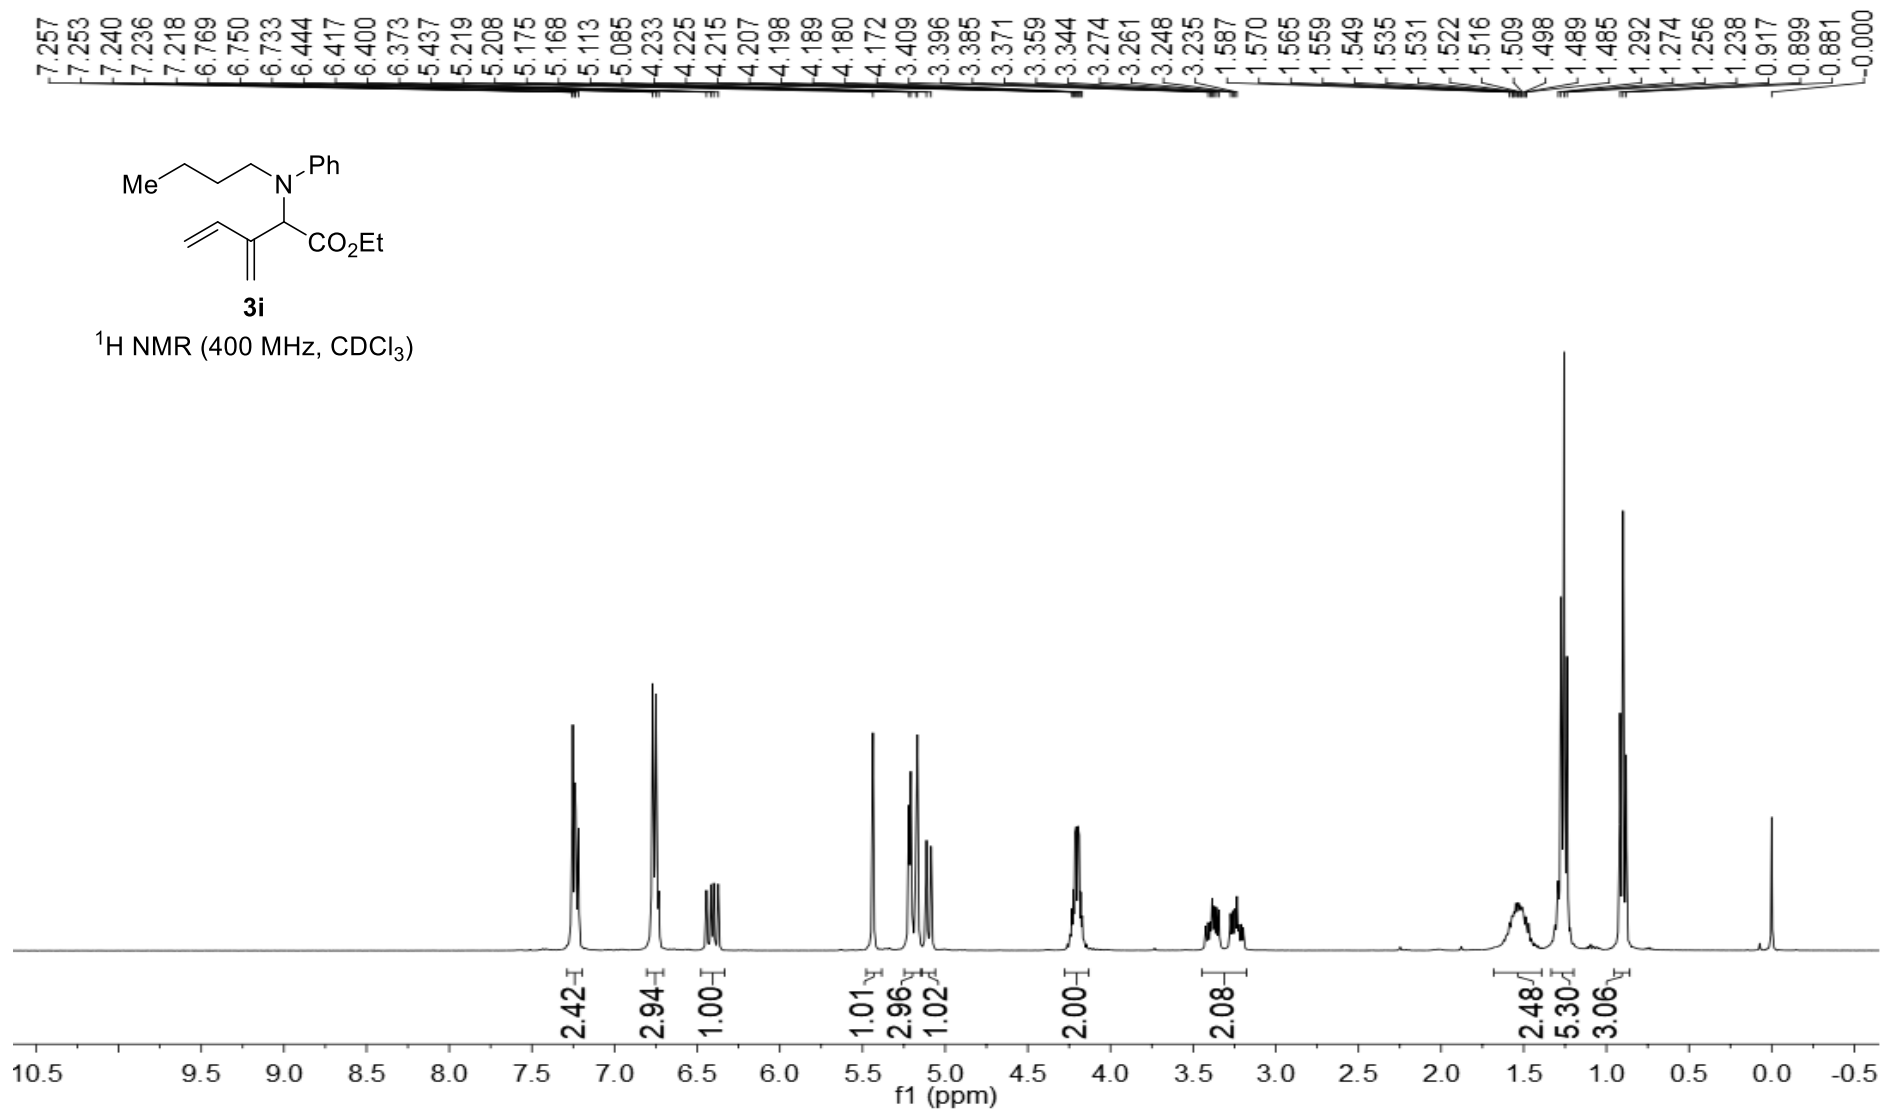

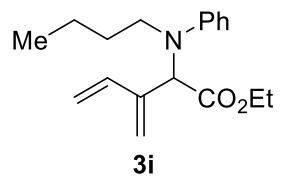

<sup>13</sup>C NMR (100 MHz, CDCl<sub>3</sub>)

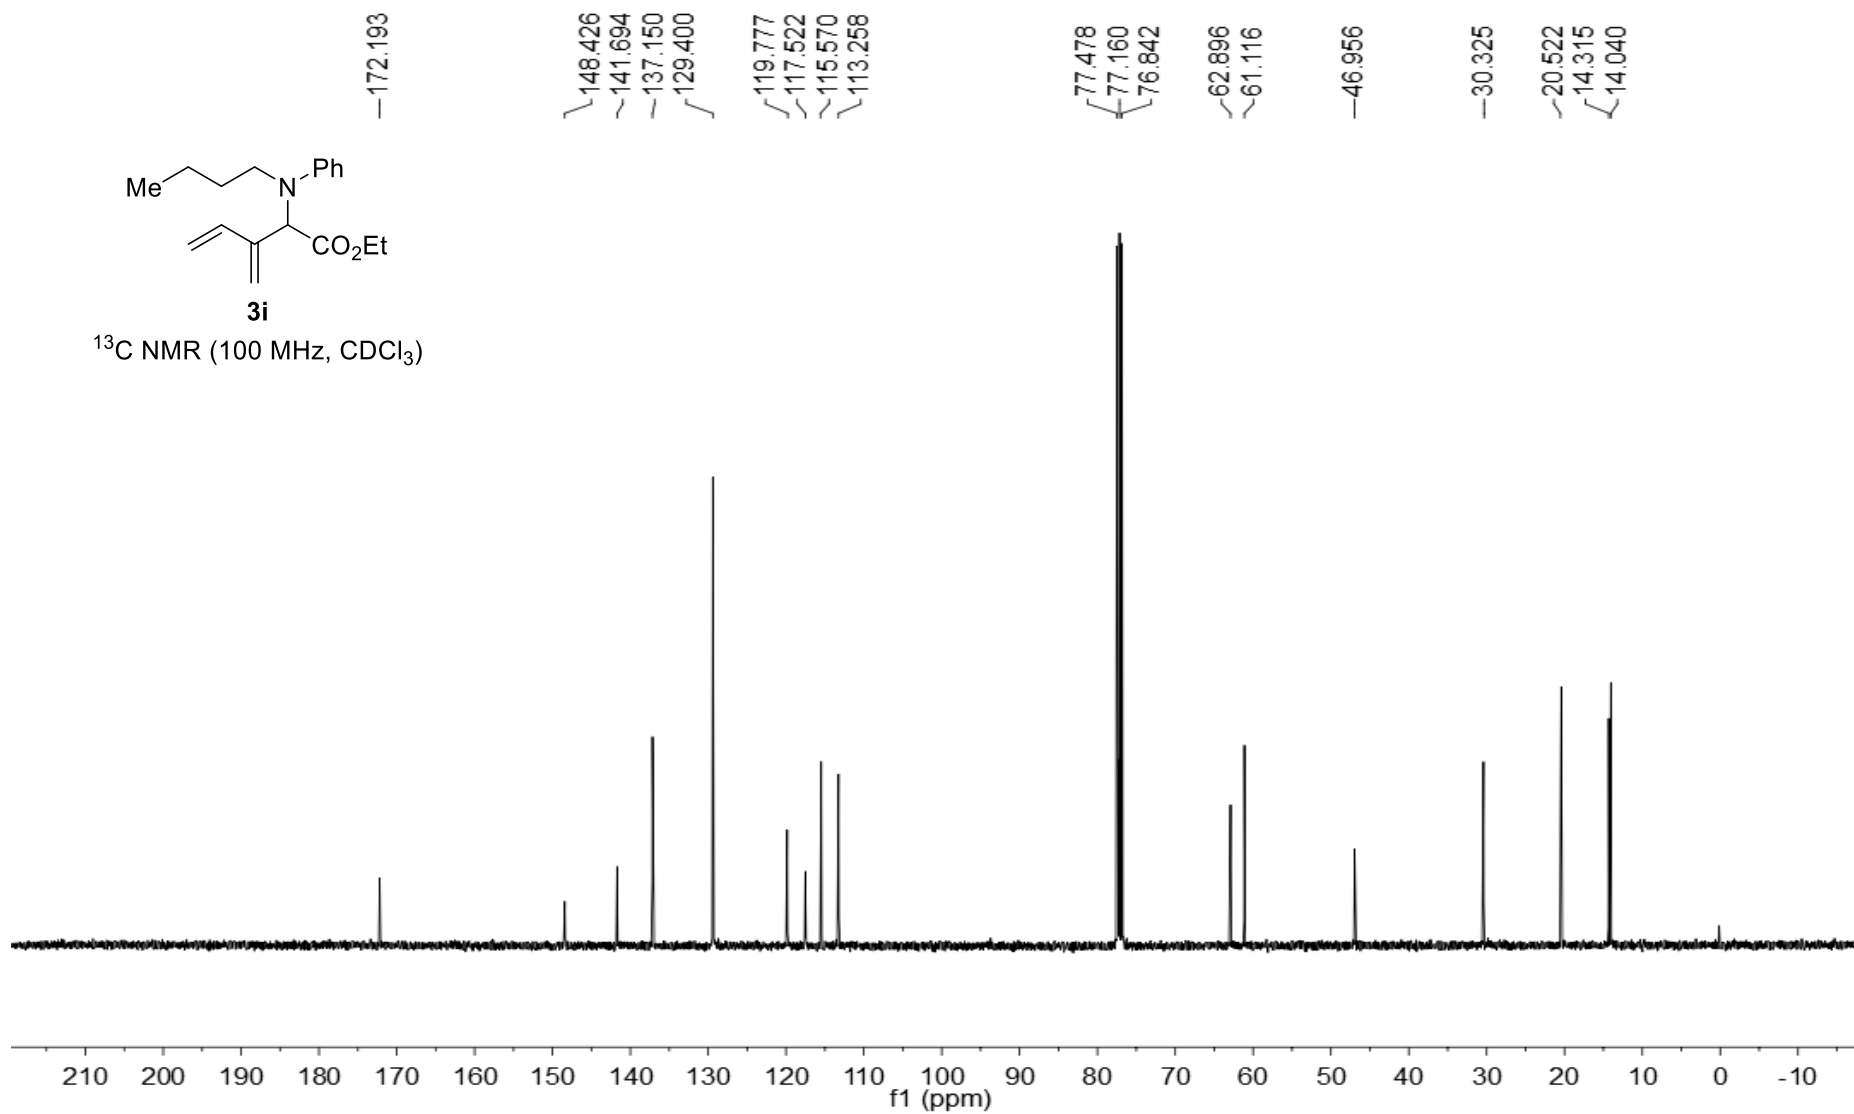

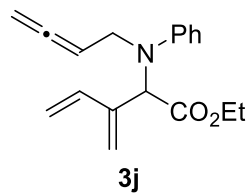

<sup>1</sup>H NMR (400 MHz, CDCl<sub>3</sub>)

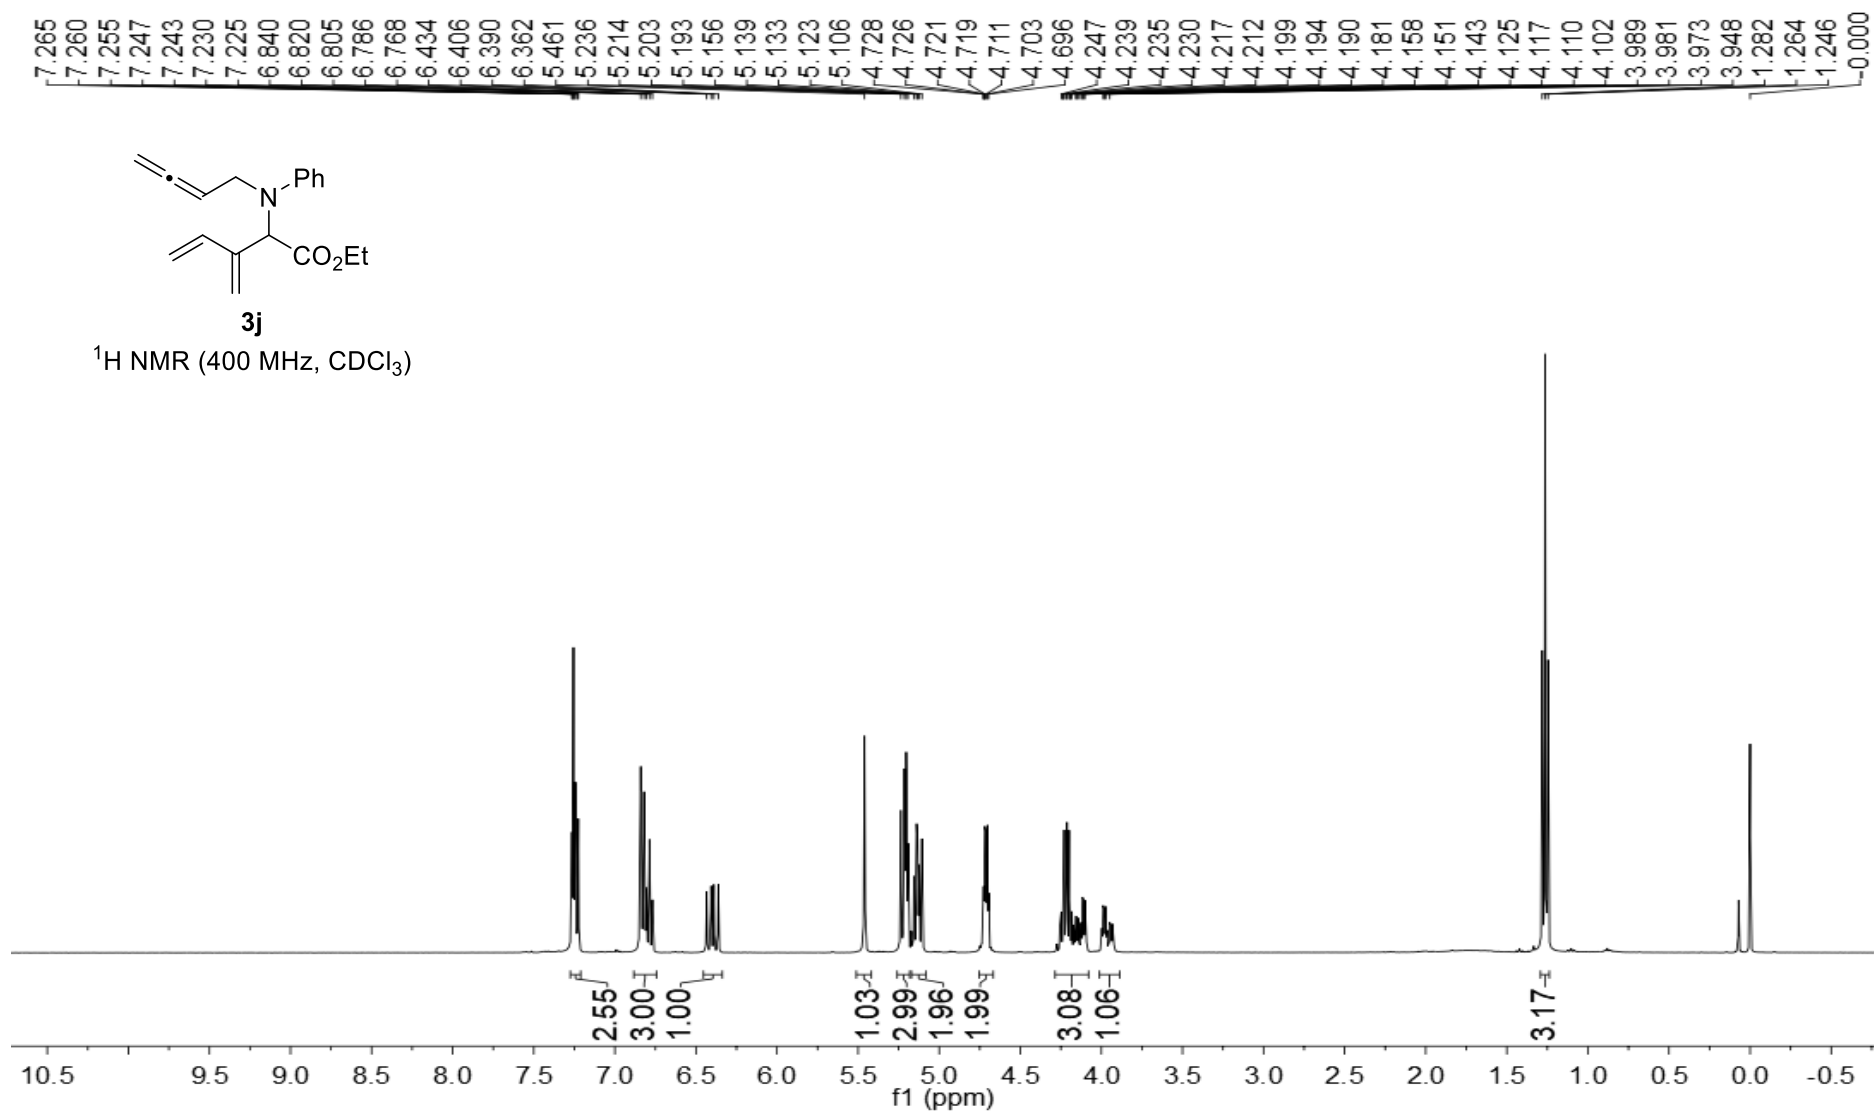



-208.586

-172.012

-148.149

-141.489

-136.808

-129.342

-120.121

-118.156

-115.746

-113.683

-89.277

-77.477

-77.160

-76.842

-75.996

-62.649

-61.270

-46.153

-14.325

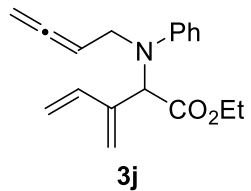

<sup>13</sup>C NMR (100 MHz, CDCl<sub>3</sub>)

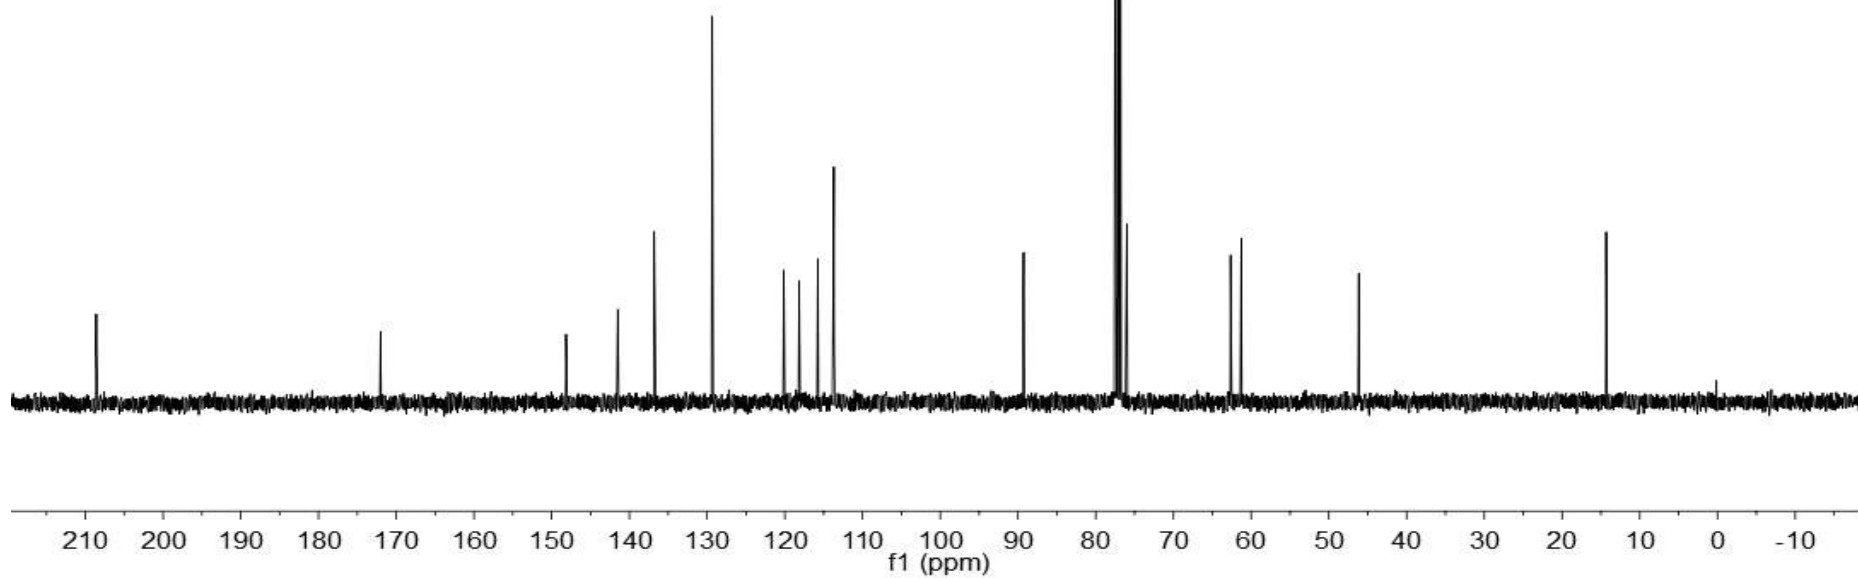

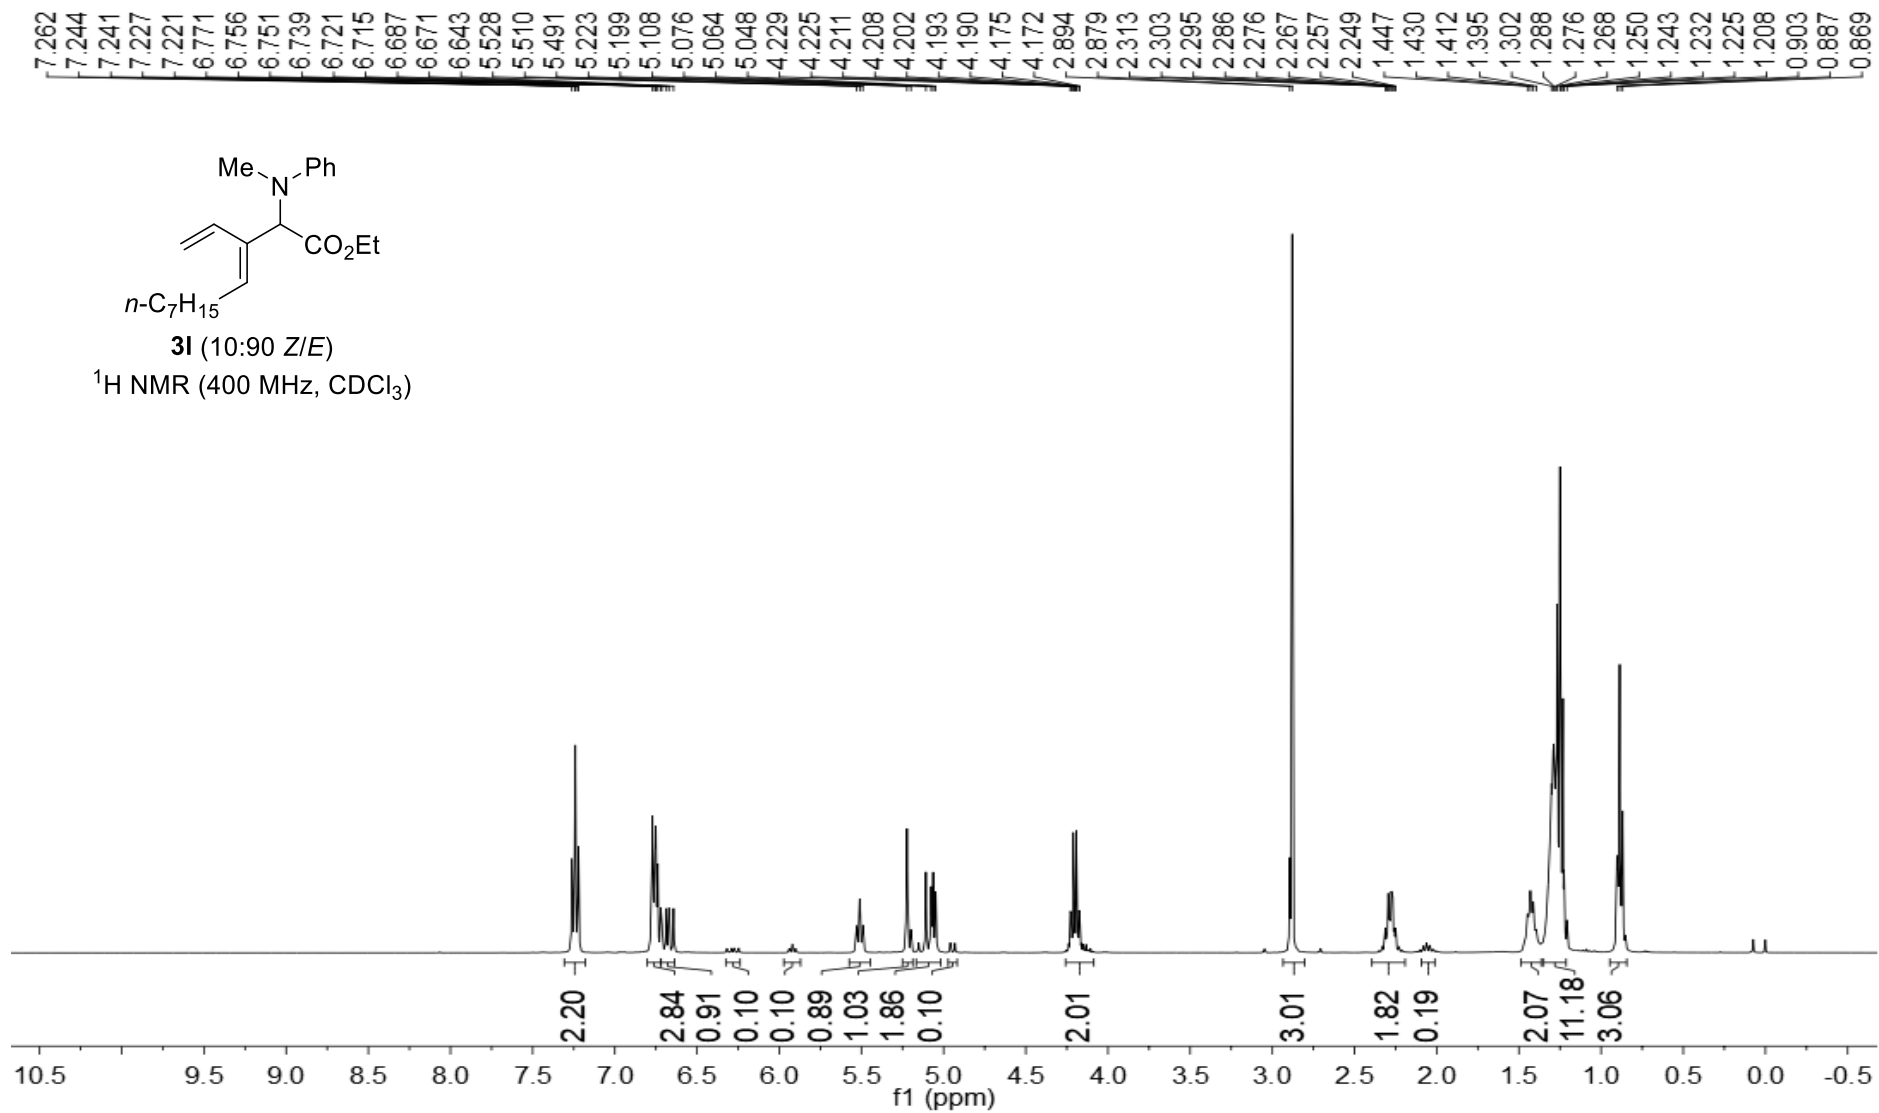

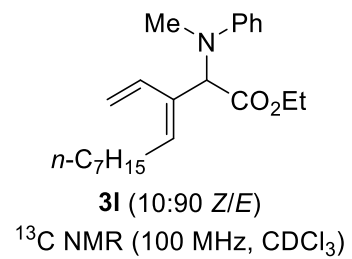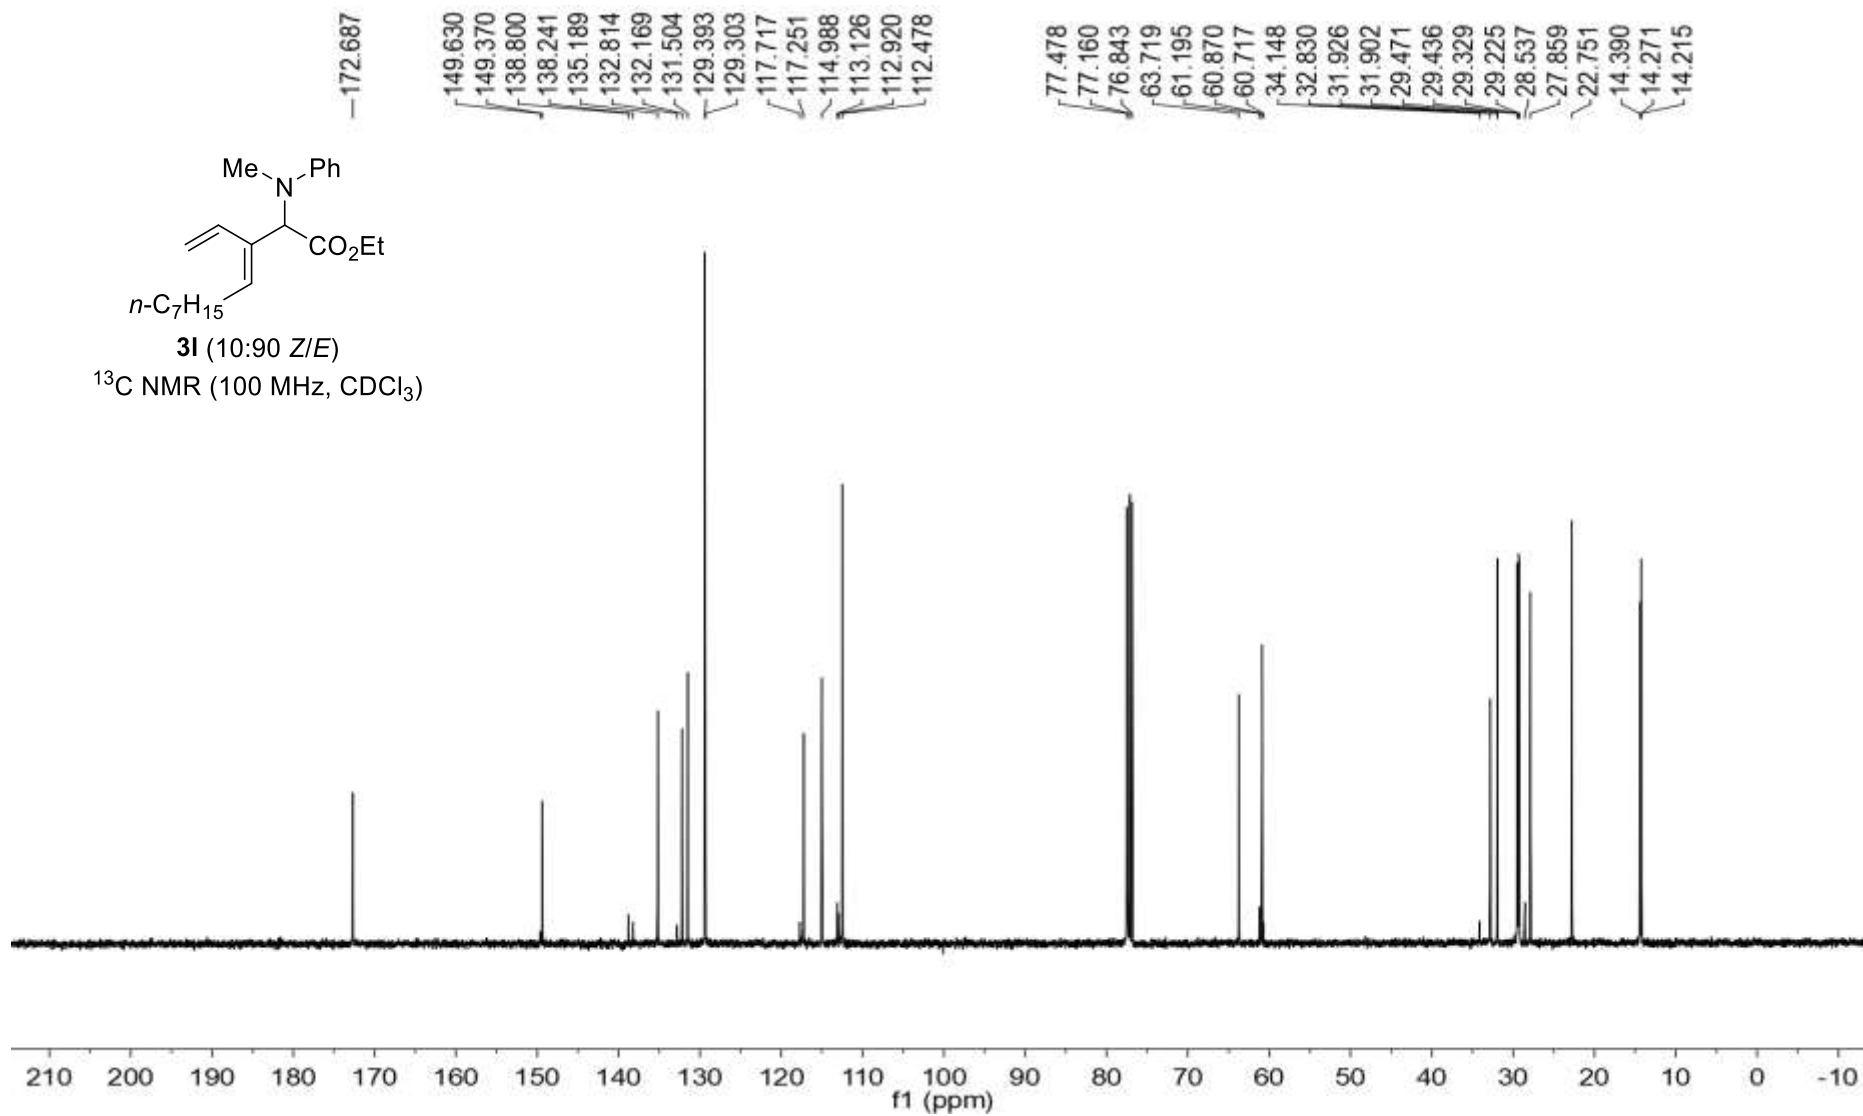

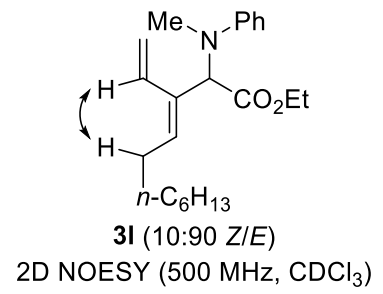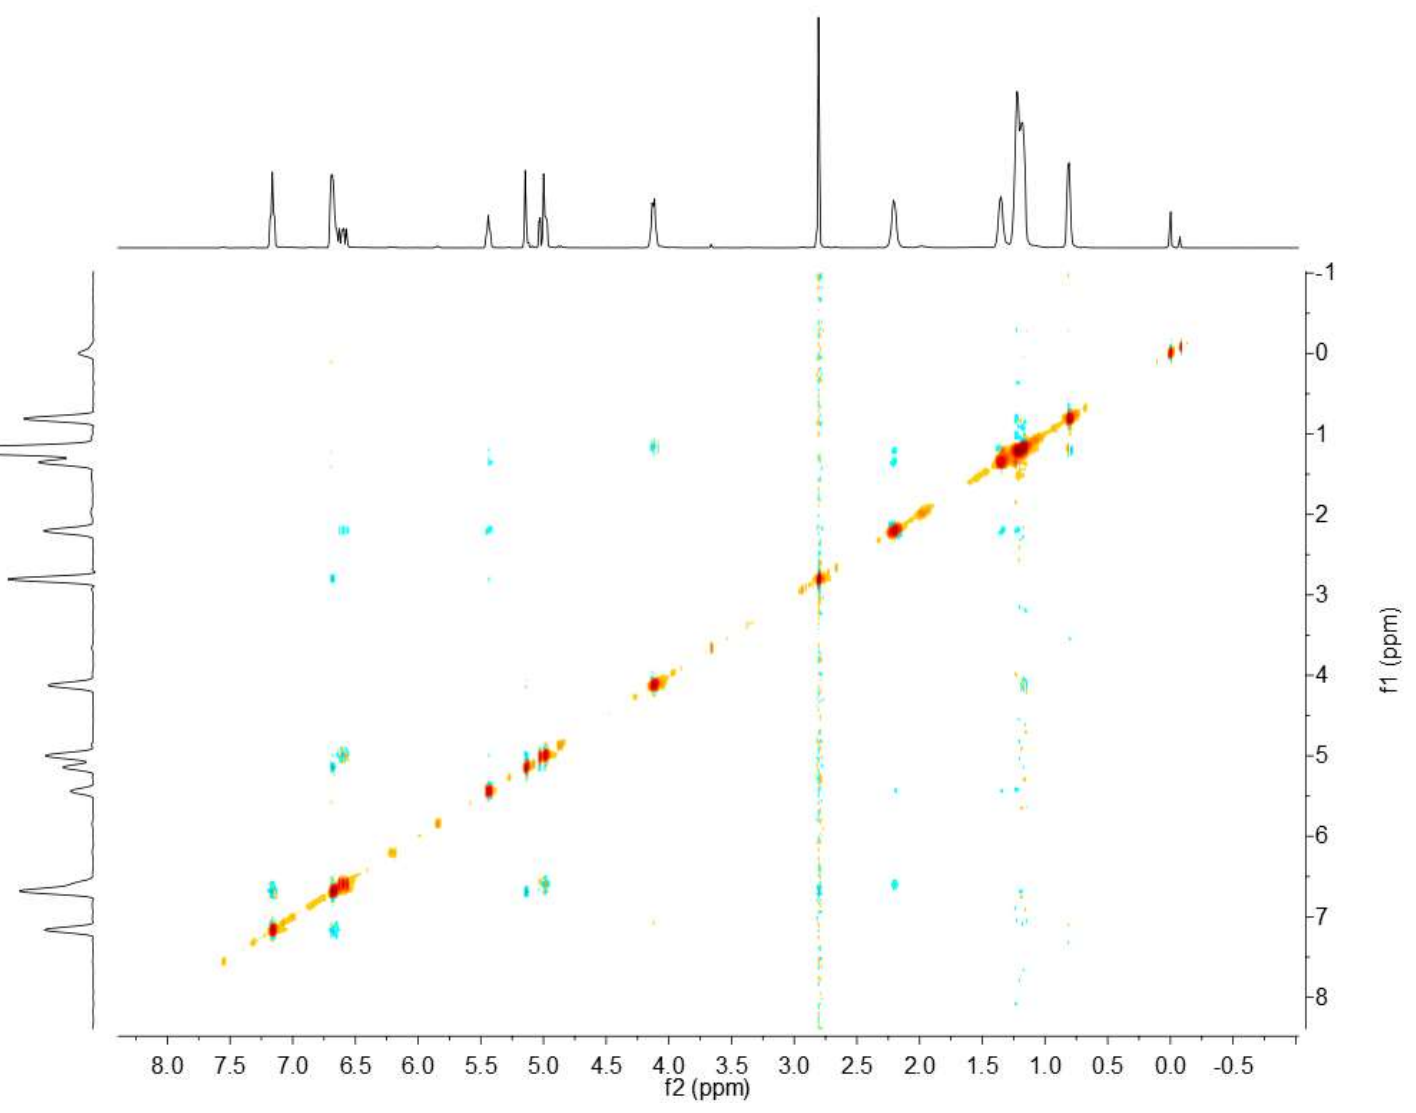

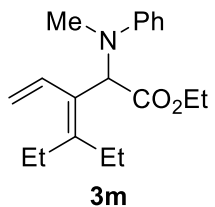

<sup>1</sup>H NMR (400 MHz, CDCl<sub>3</sub>)

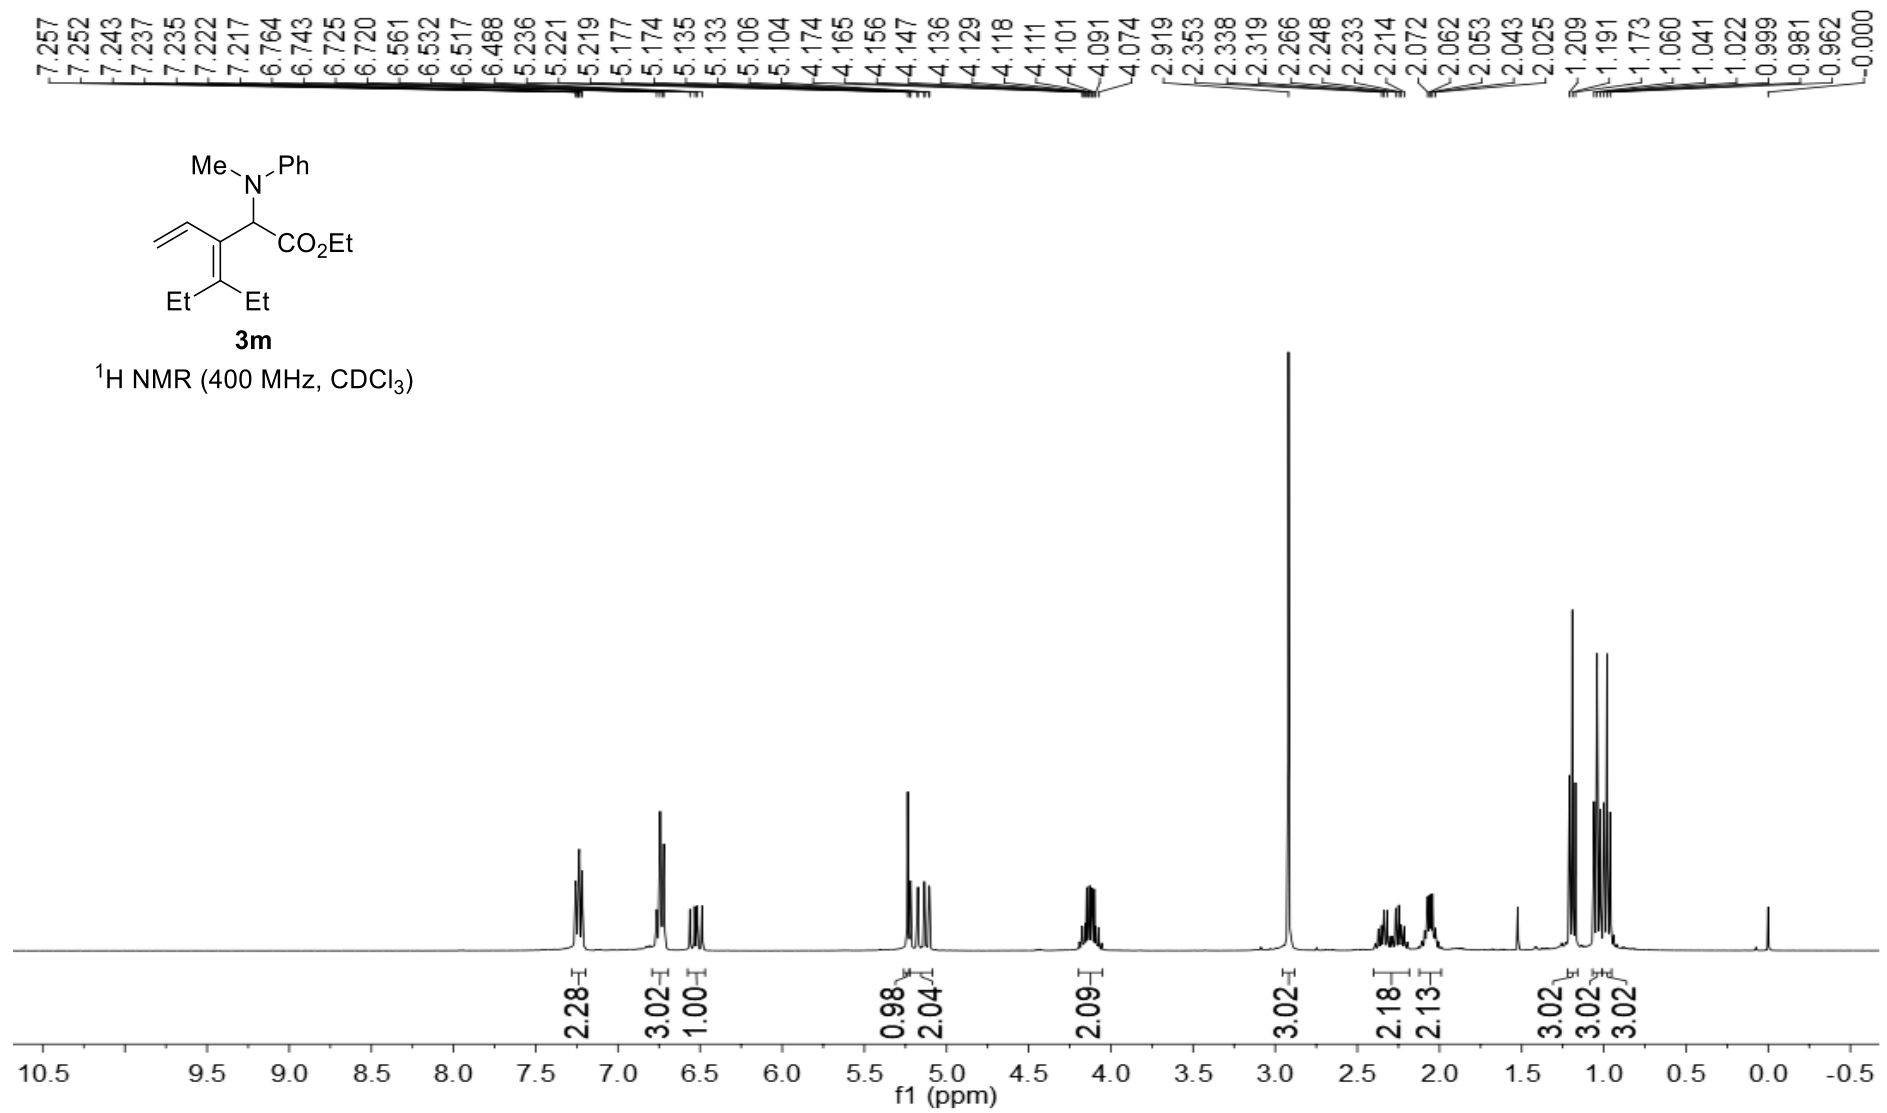

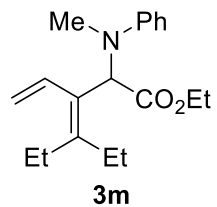

<sup>13</sup>C NMR (100 MHz, CDCl<sub>3</sub>)

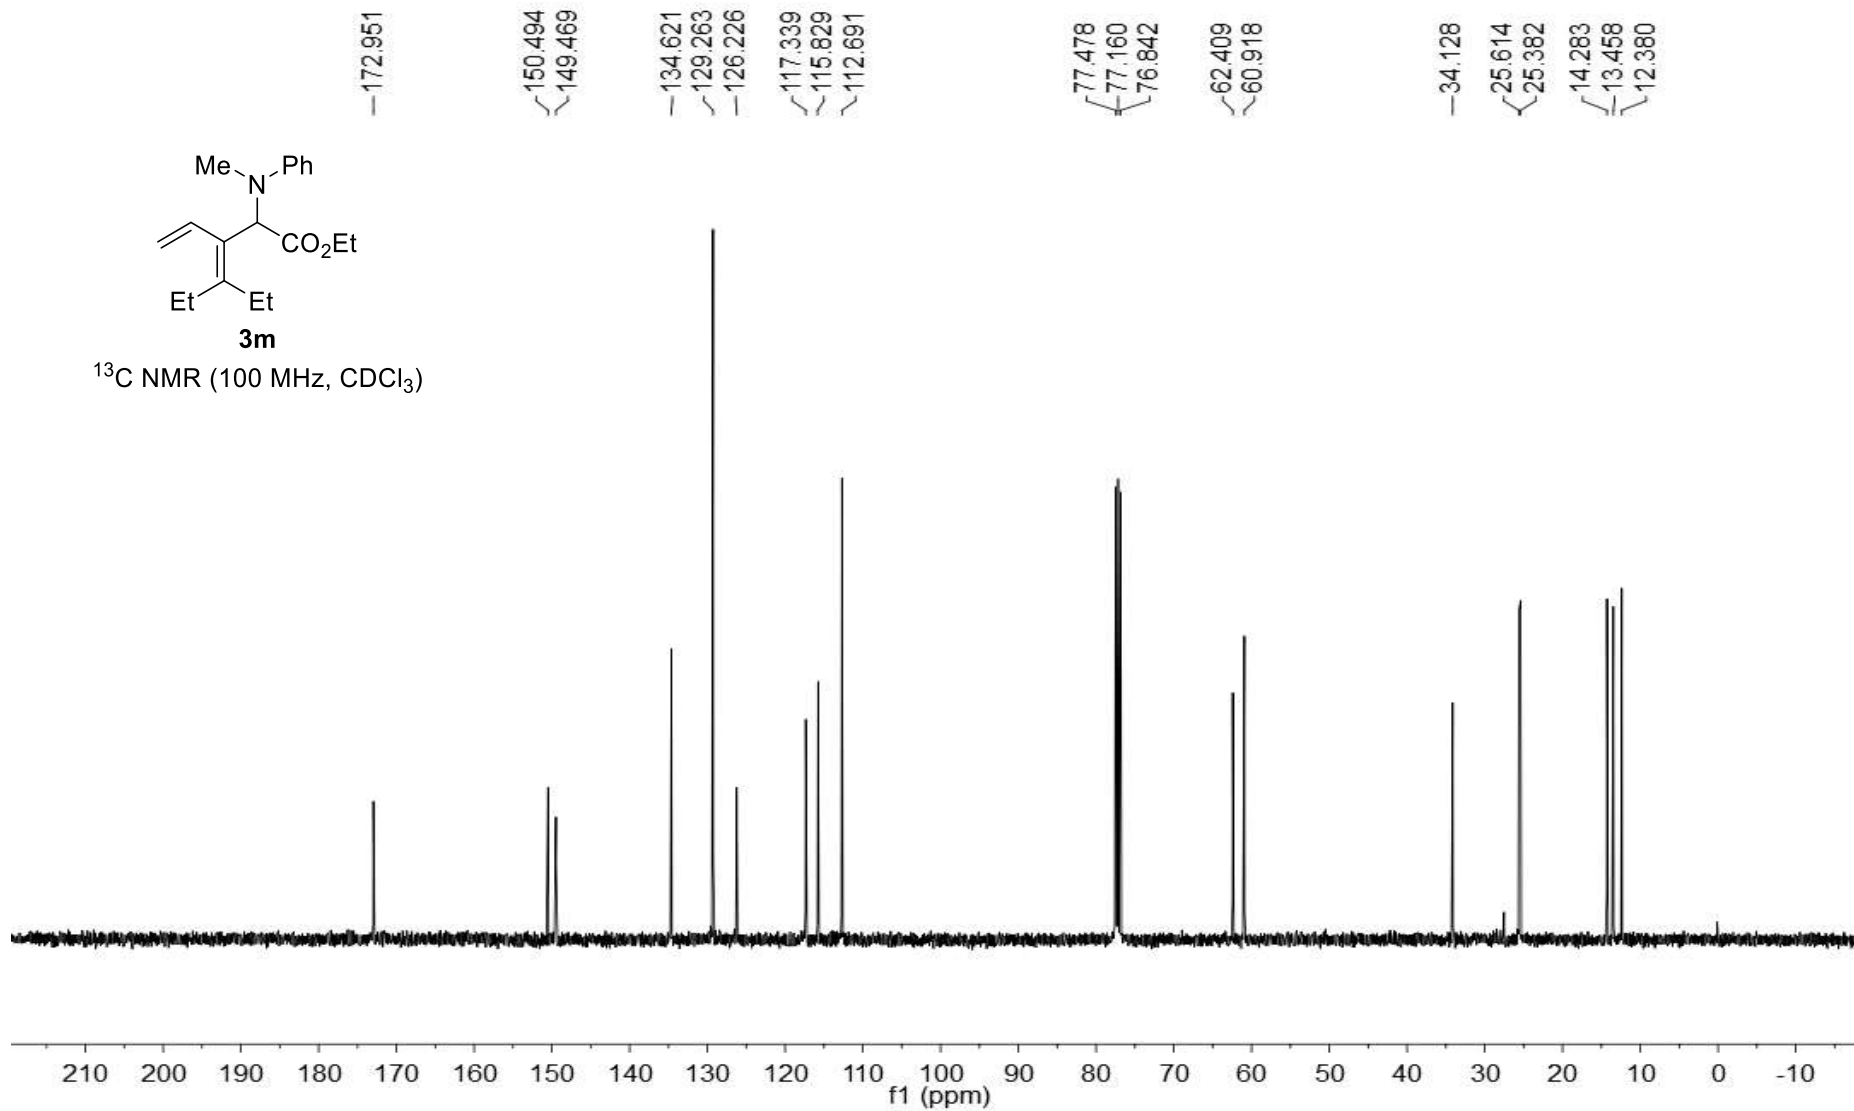

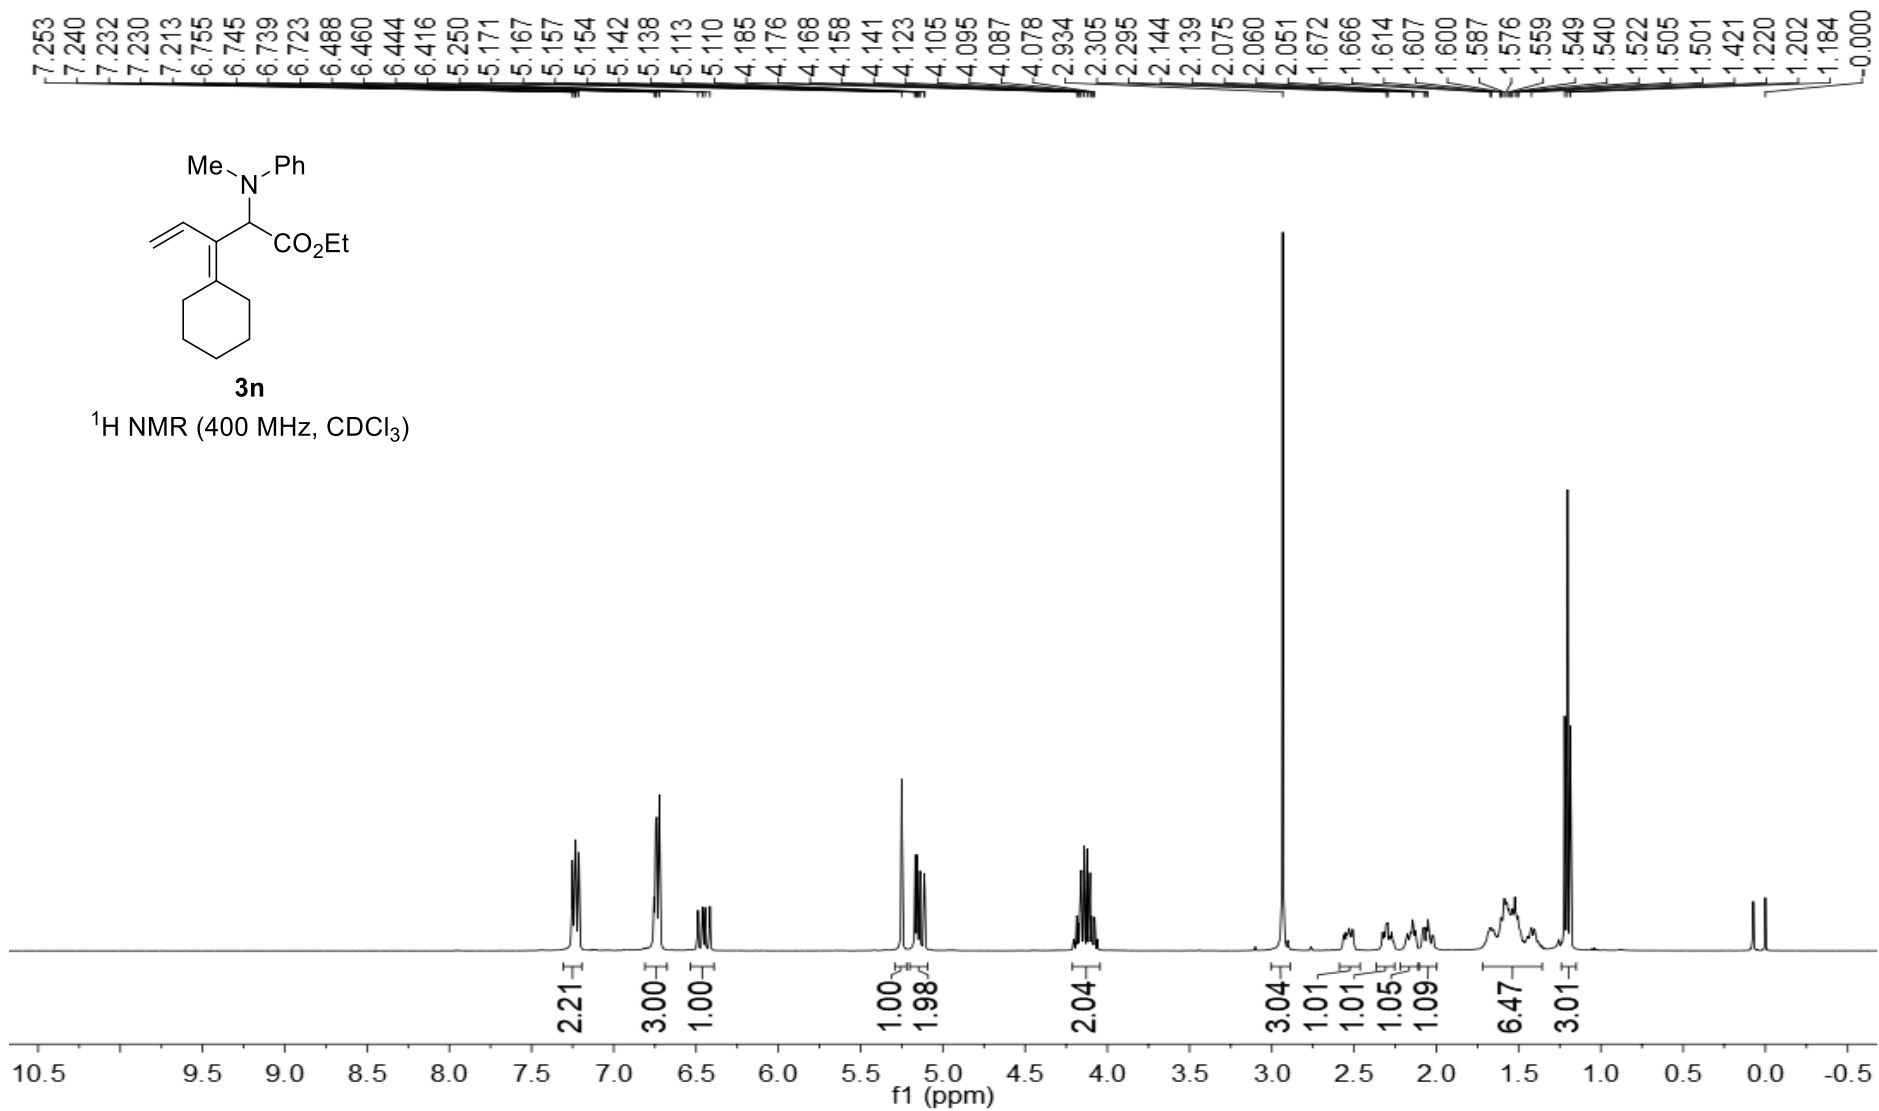

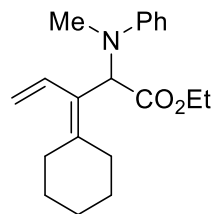

**3n**

$^{13}\text{C}$  NMR (100 MHz,  $\text{CDCl}_3$ )

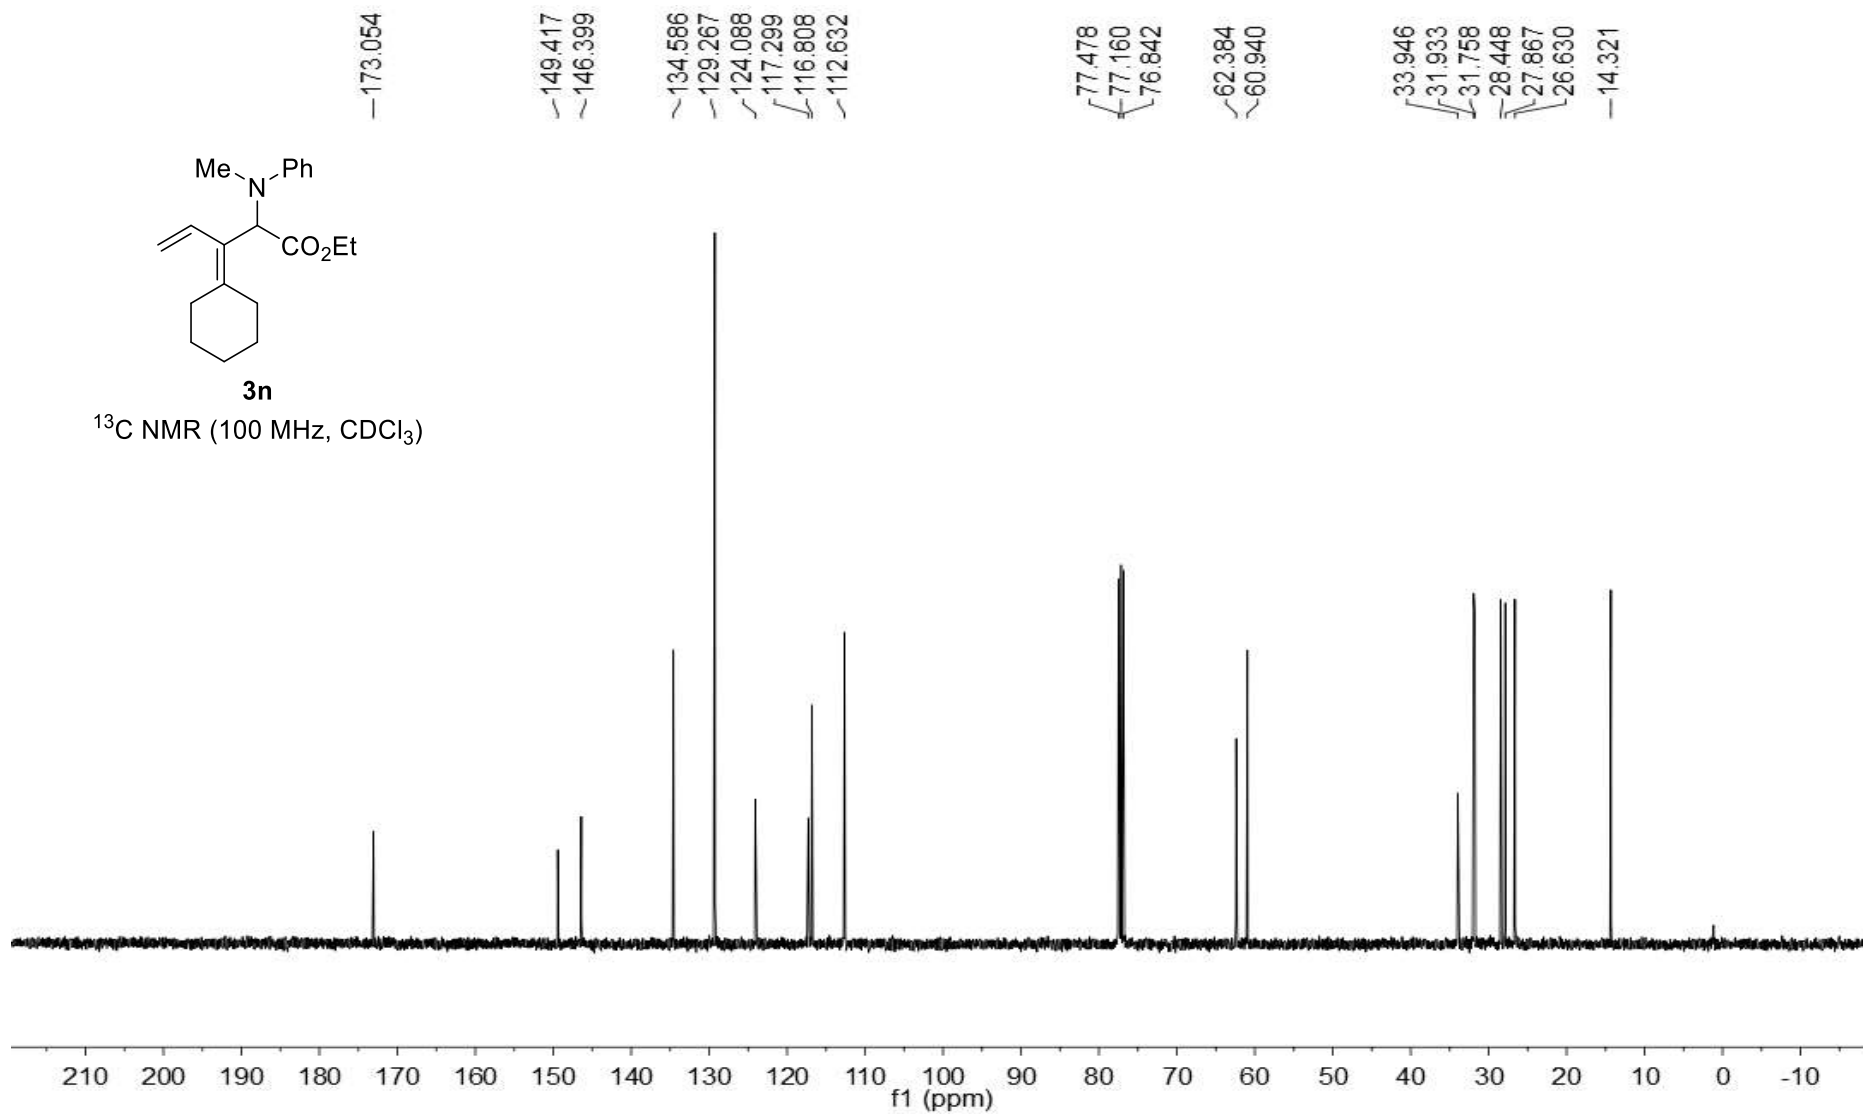



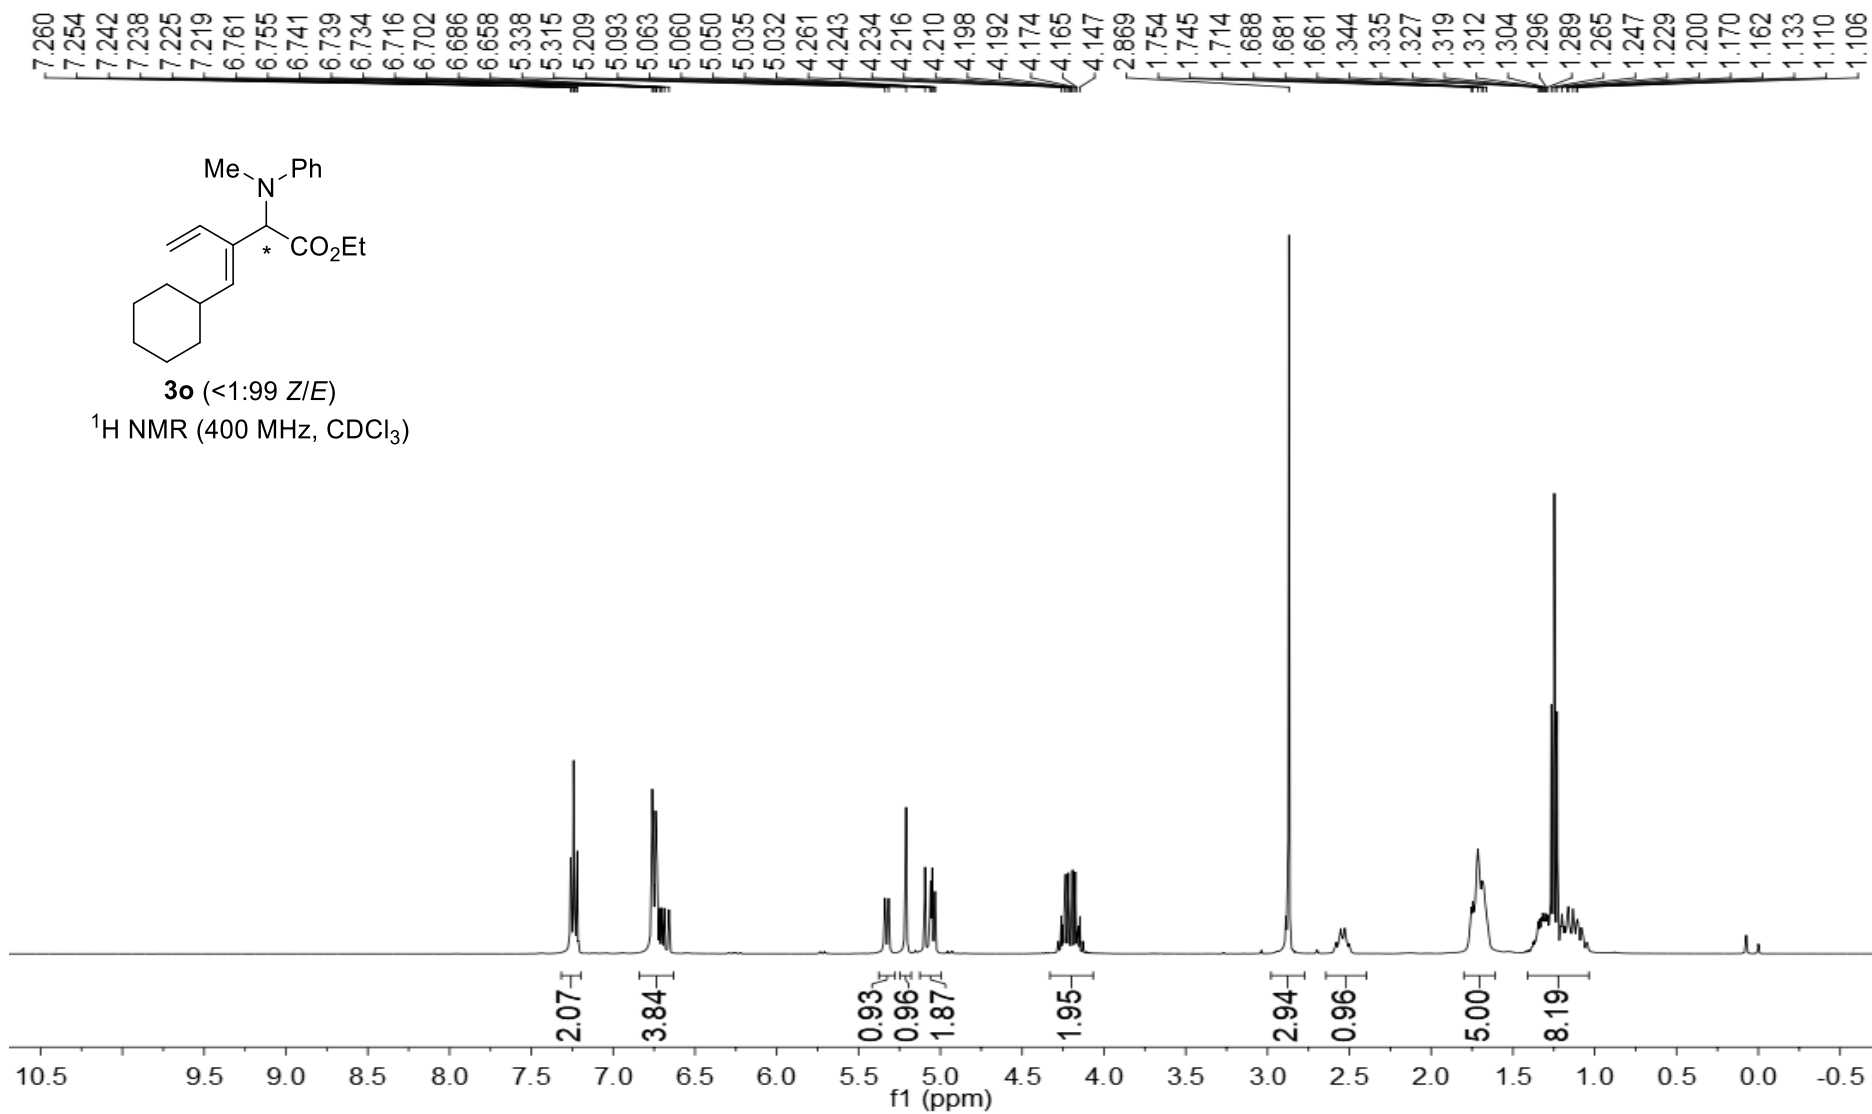

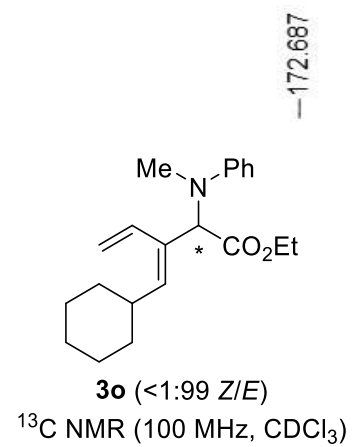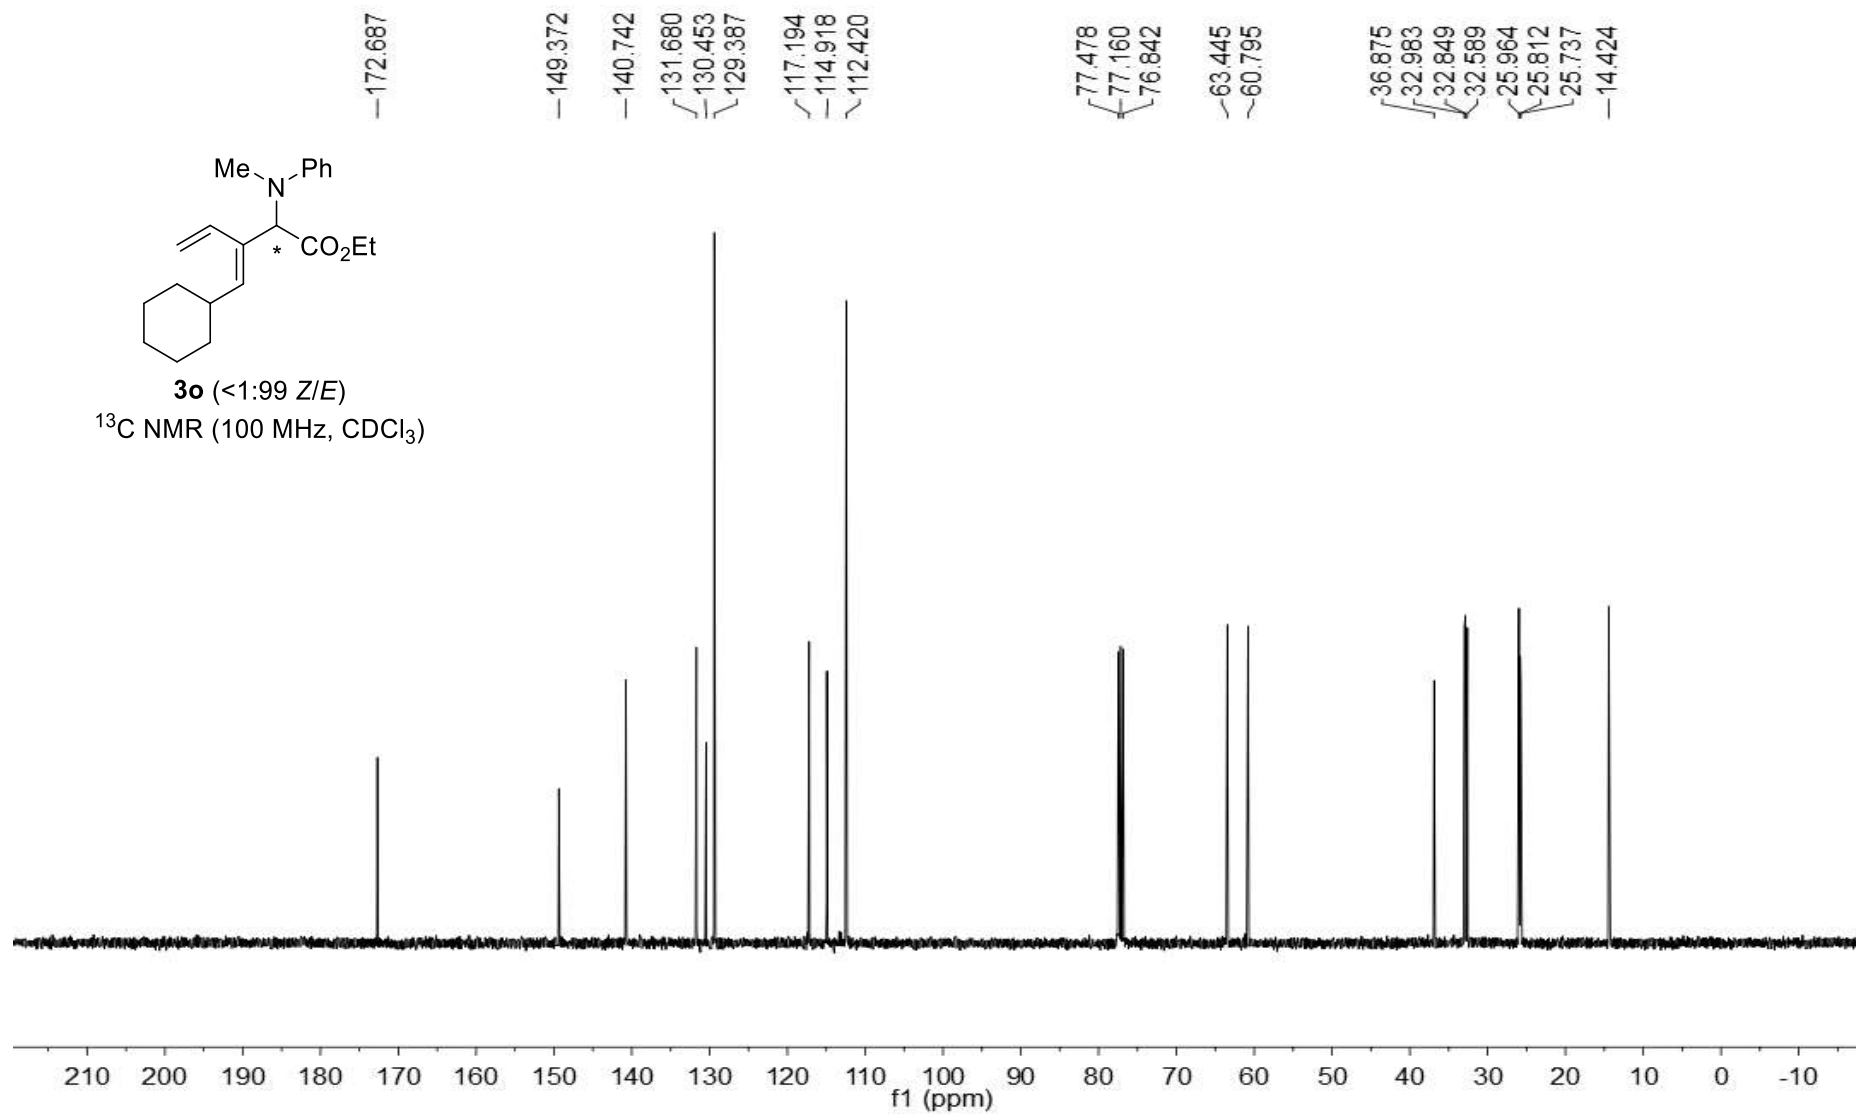

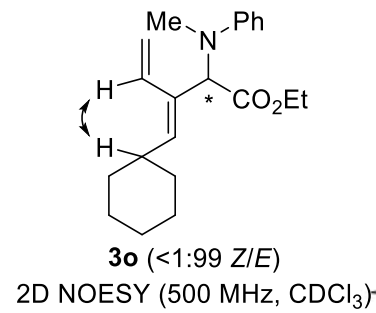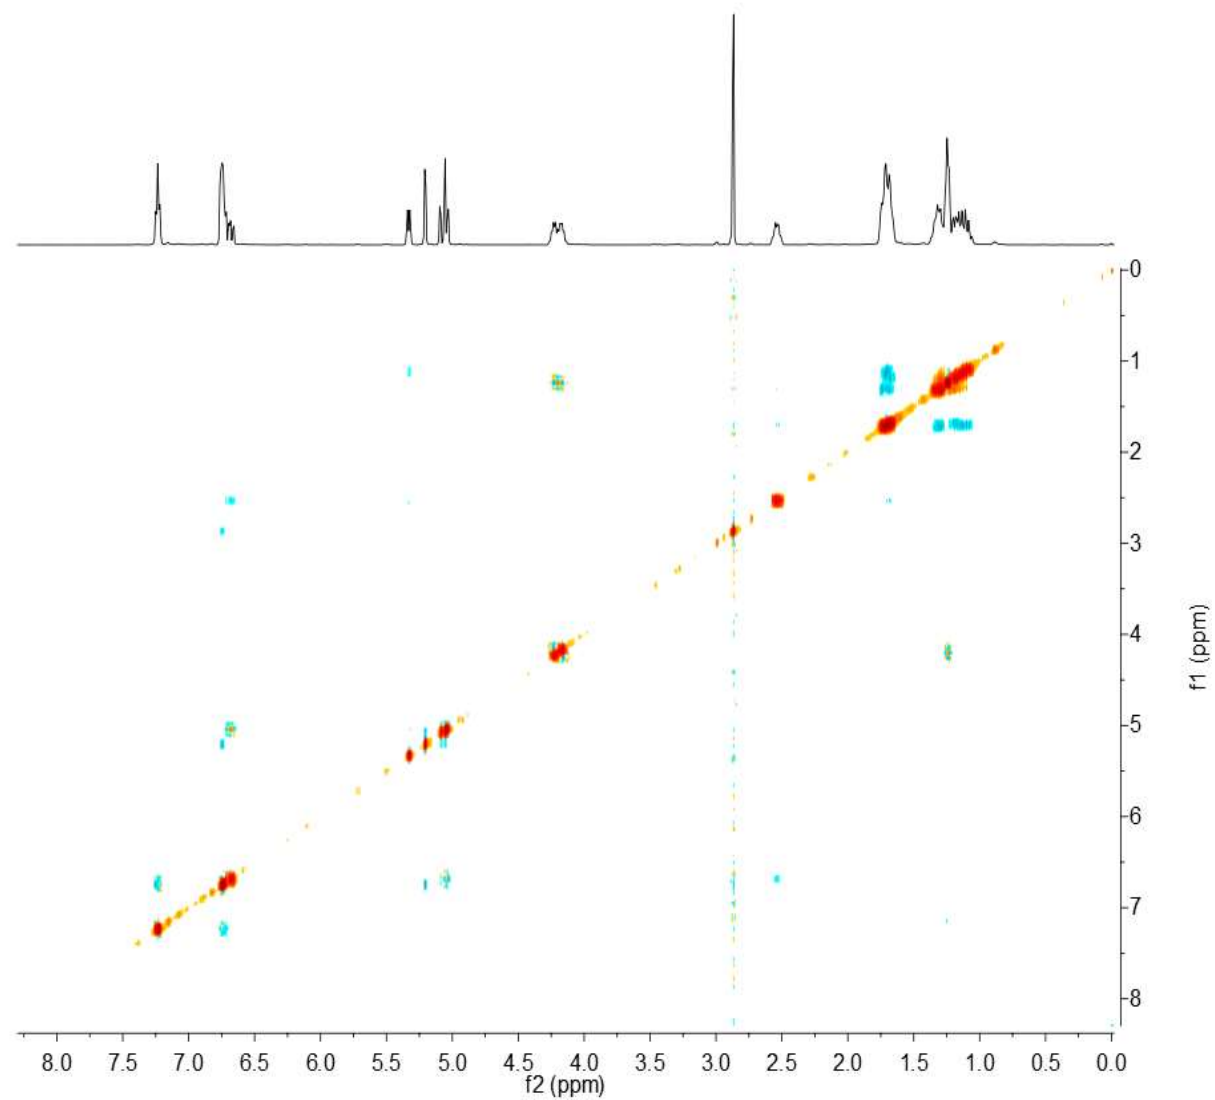

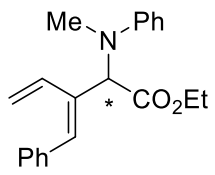

**3p** (<1:99 Z/E)  
<sup>1</sup>H NMR (400 MHz, CDCl<sub>3</sub>)

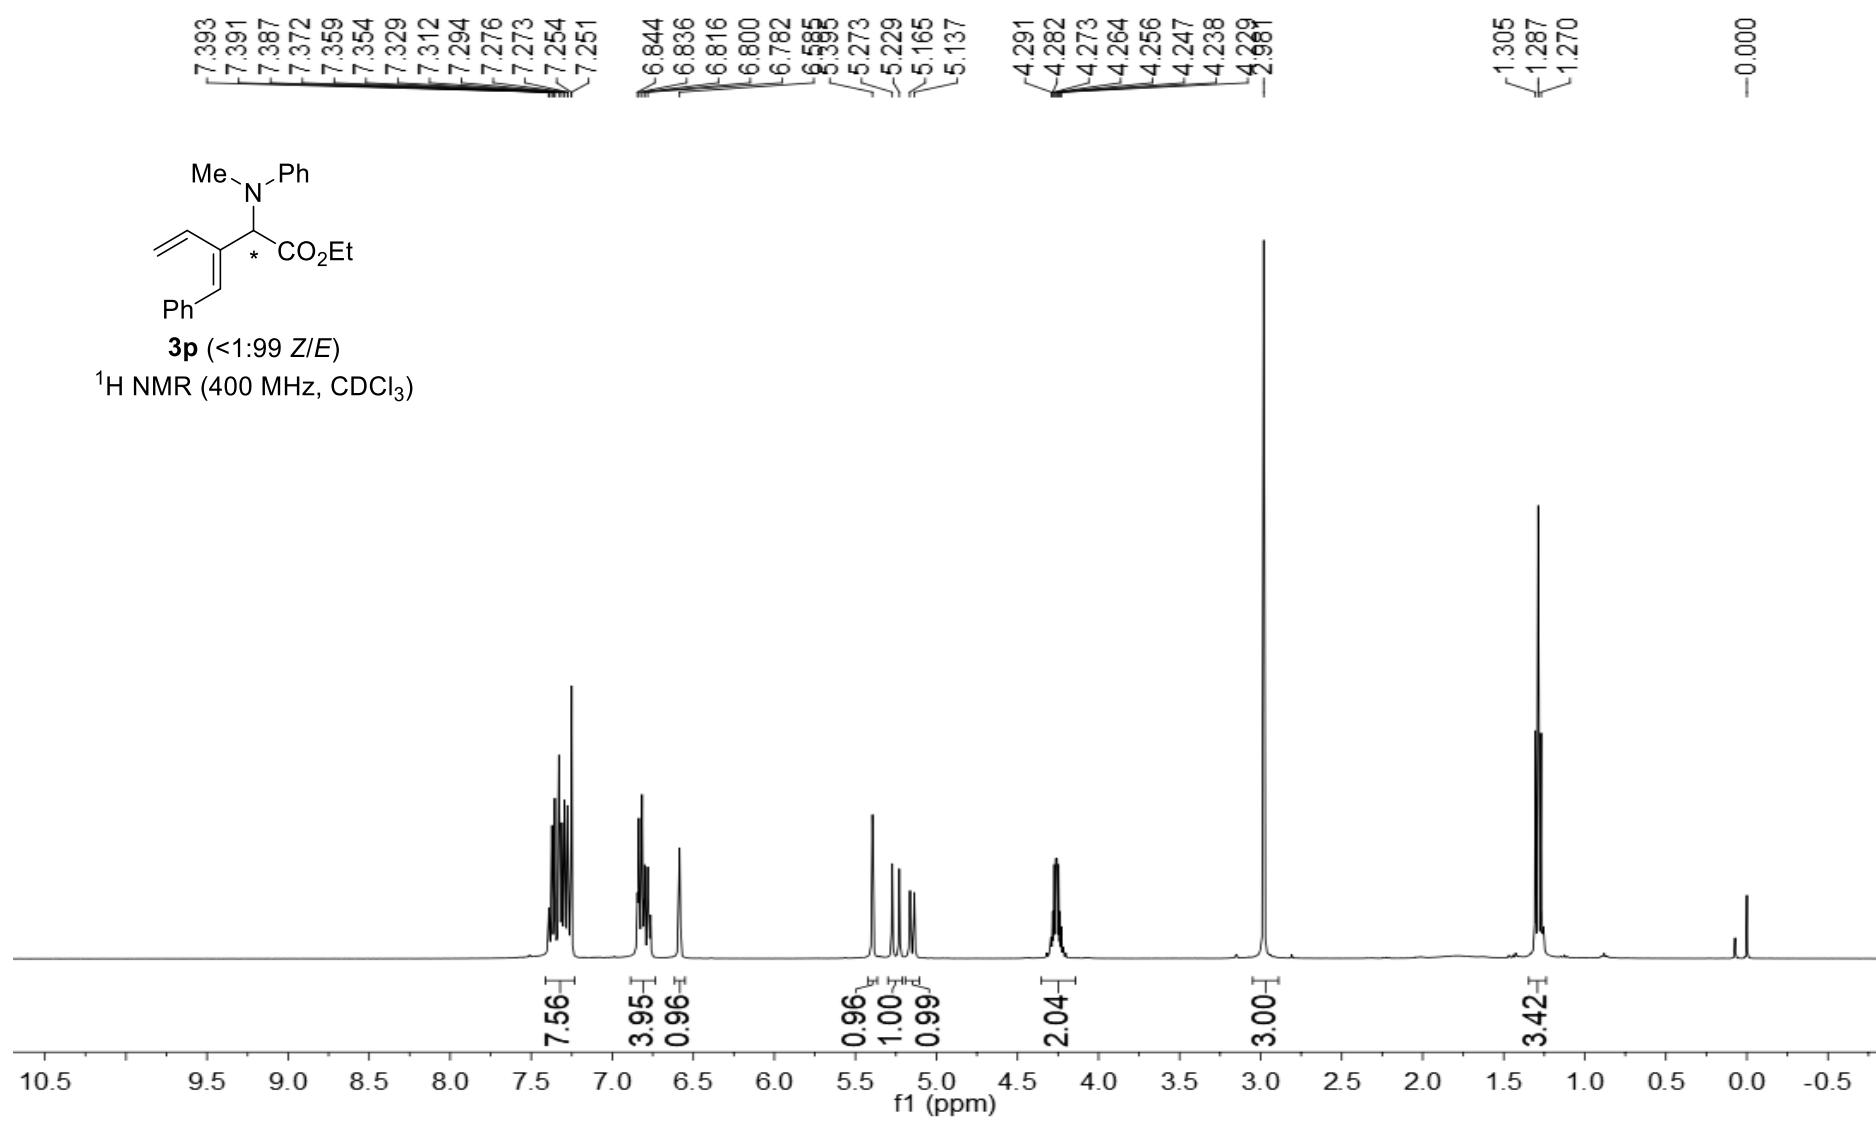

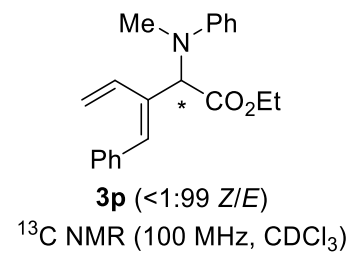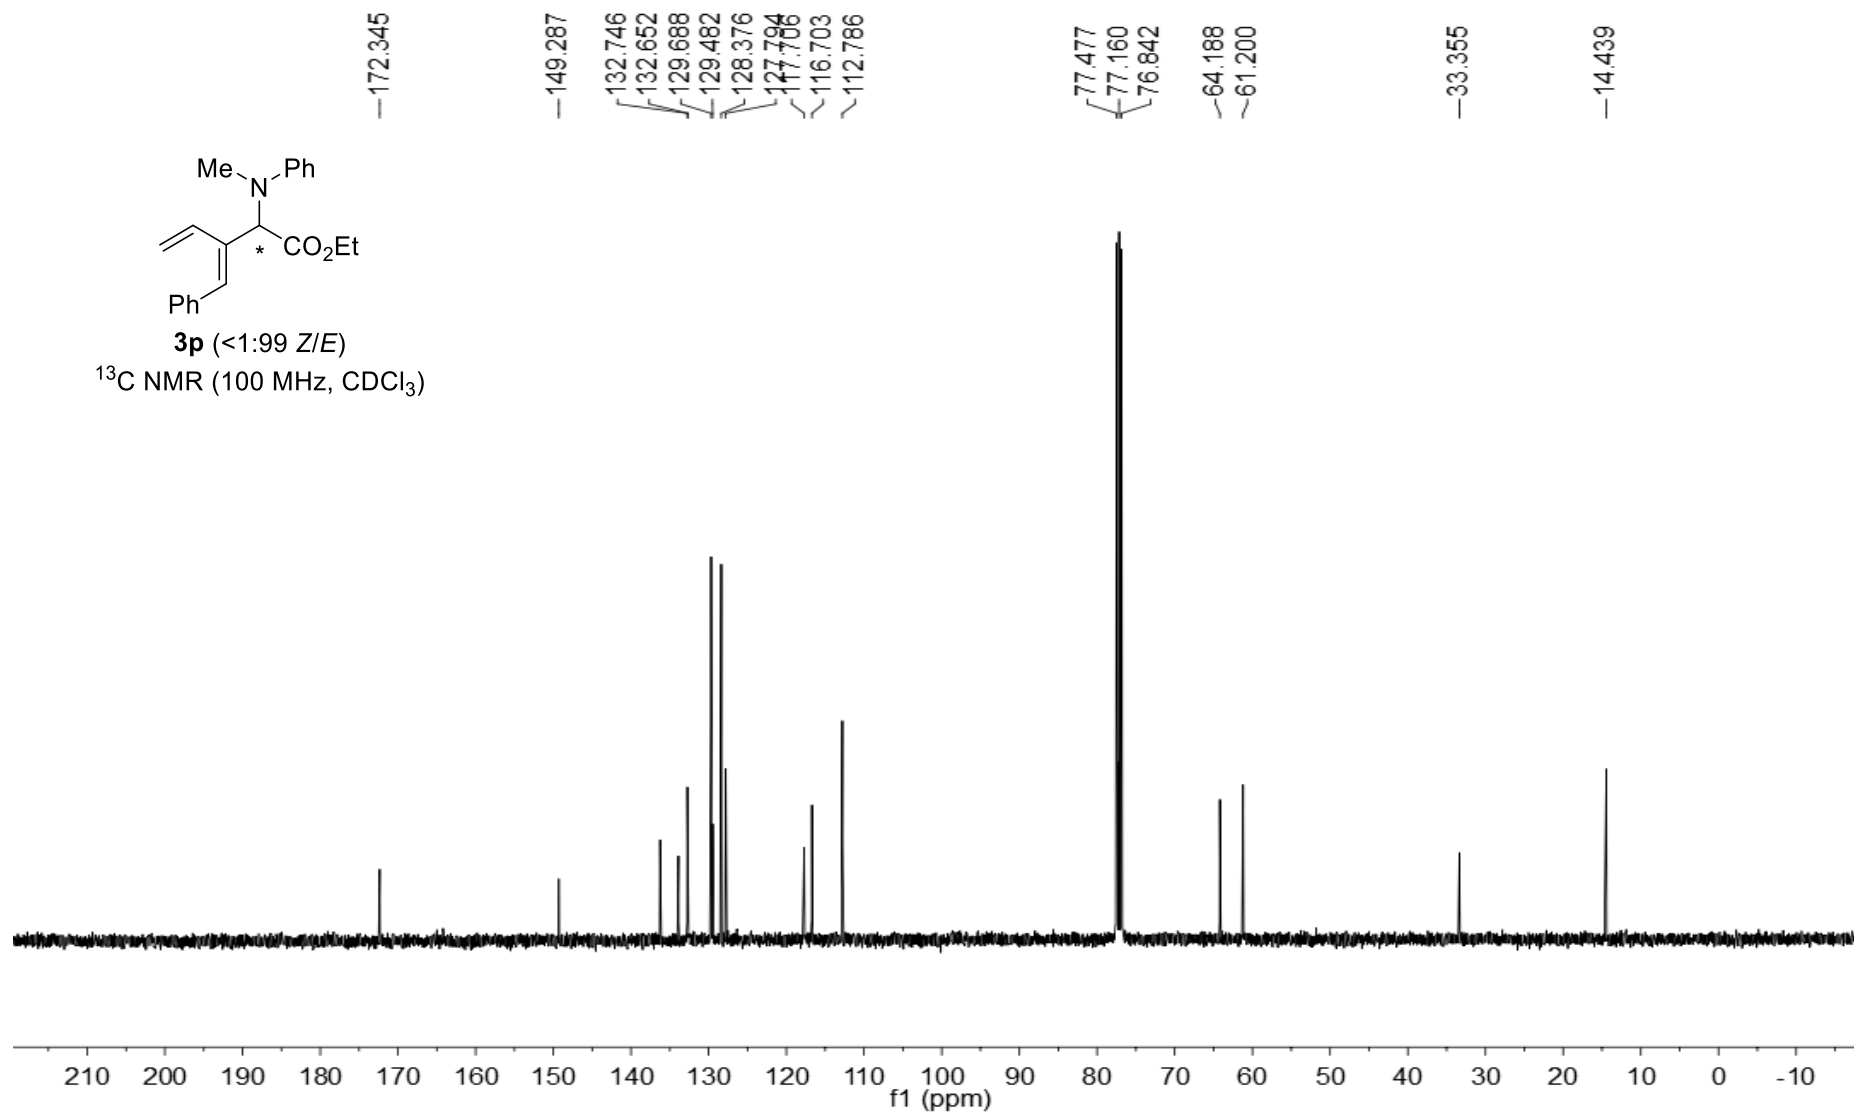

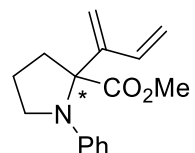

**3q**

<sup>1</sup>H NMR (400 MHz, CDCl<sub>3</sub>)

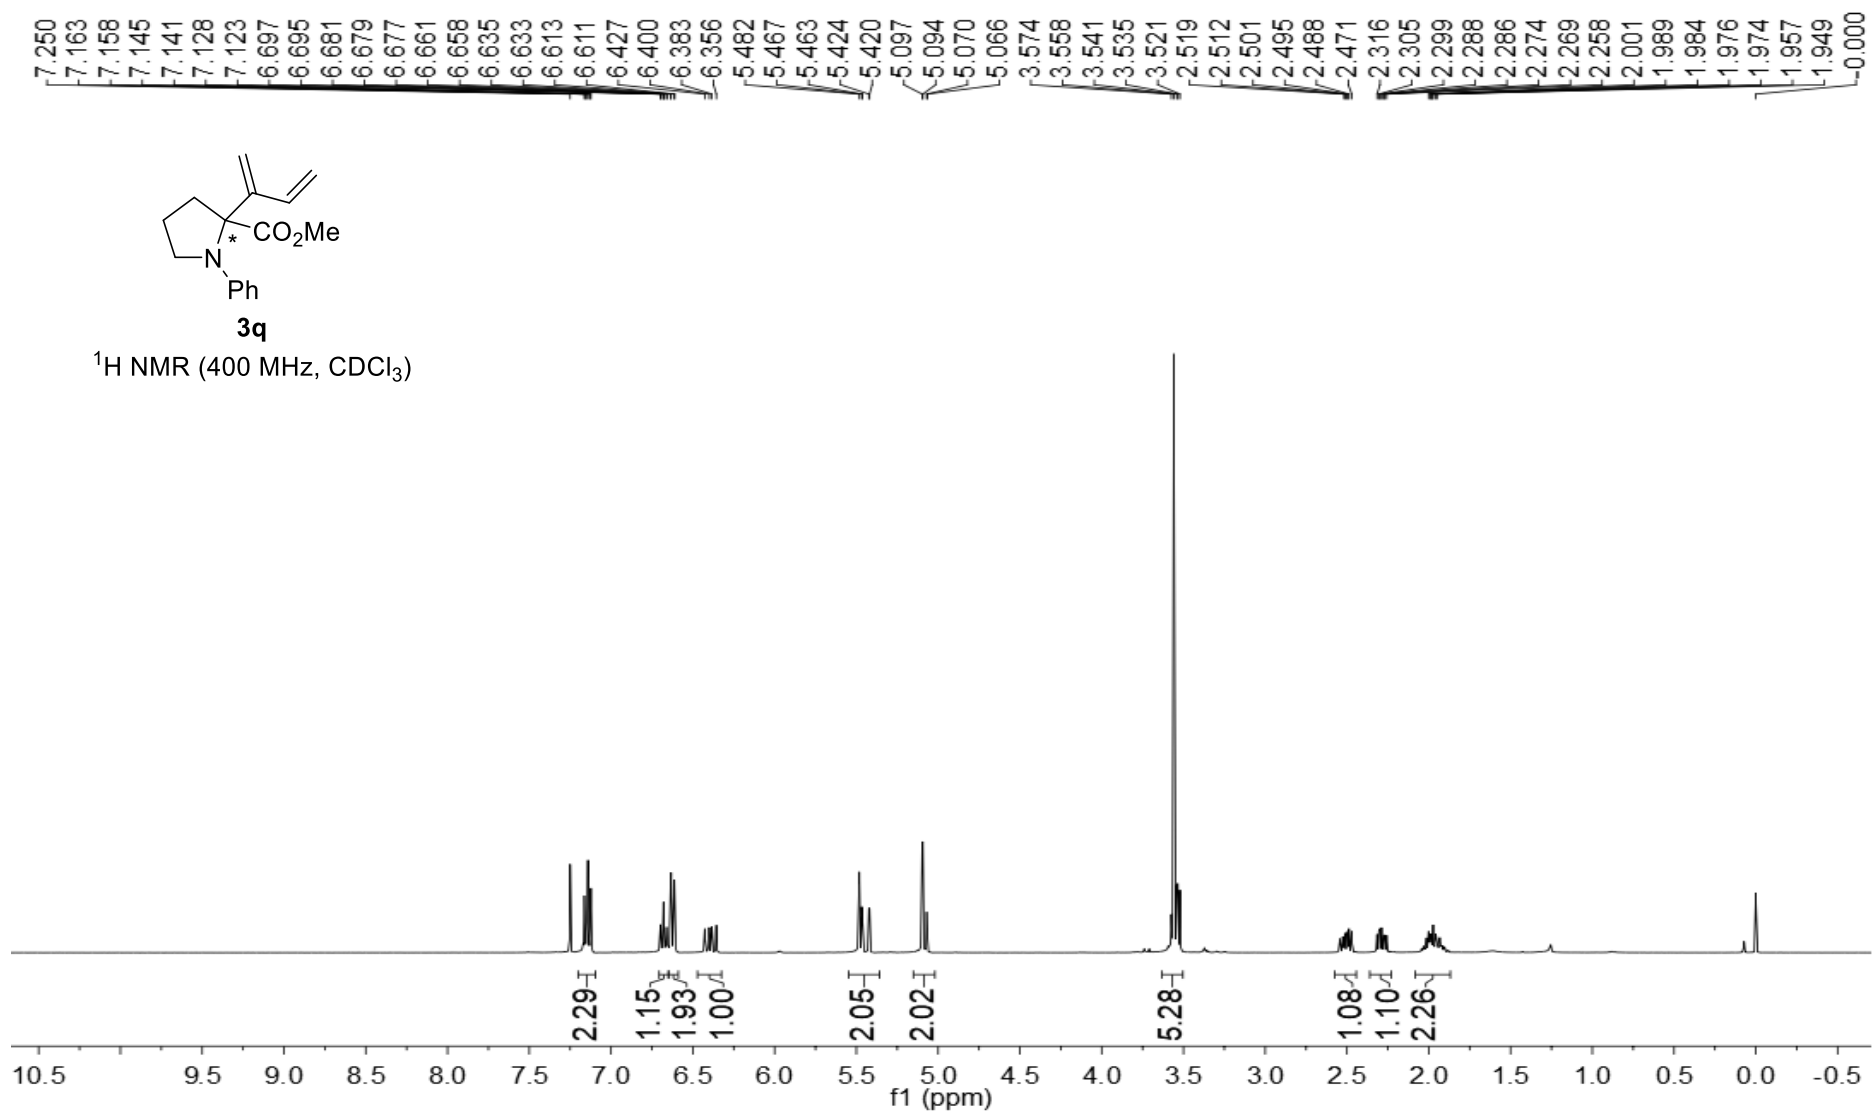

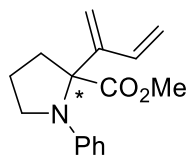

<sup>13</sup>C NMR (100 MHz, CDCl<sub>3</sub>)

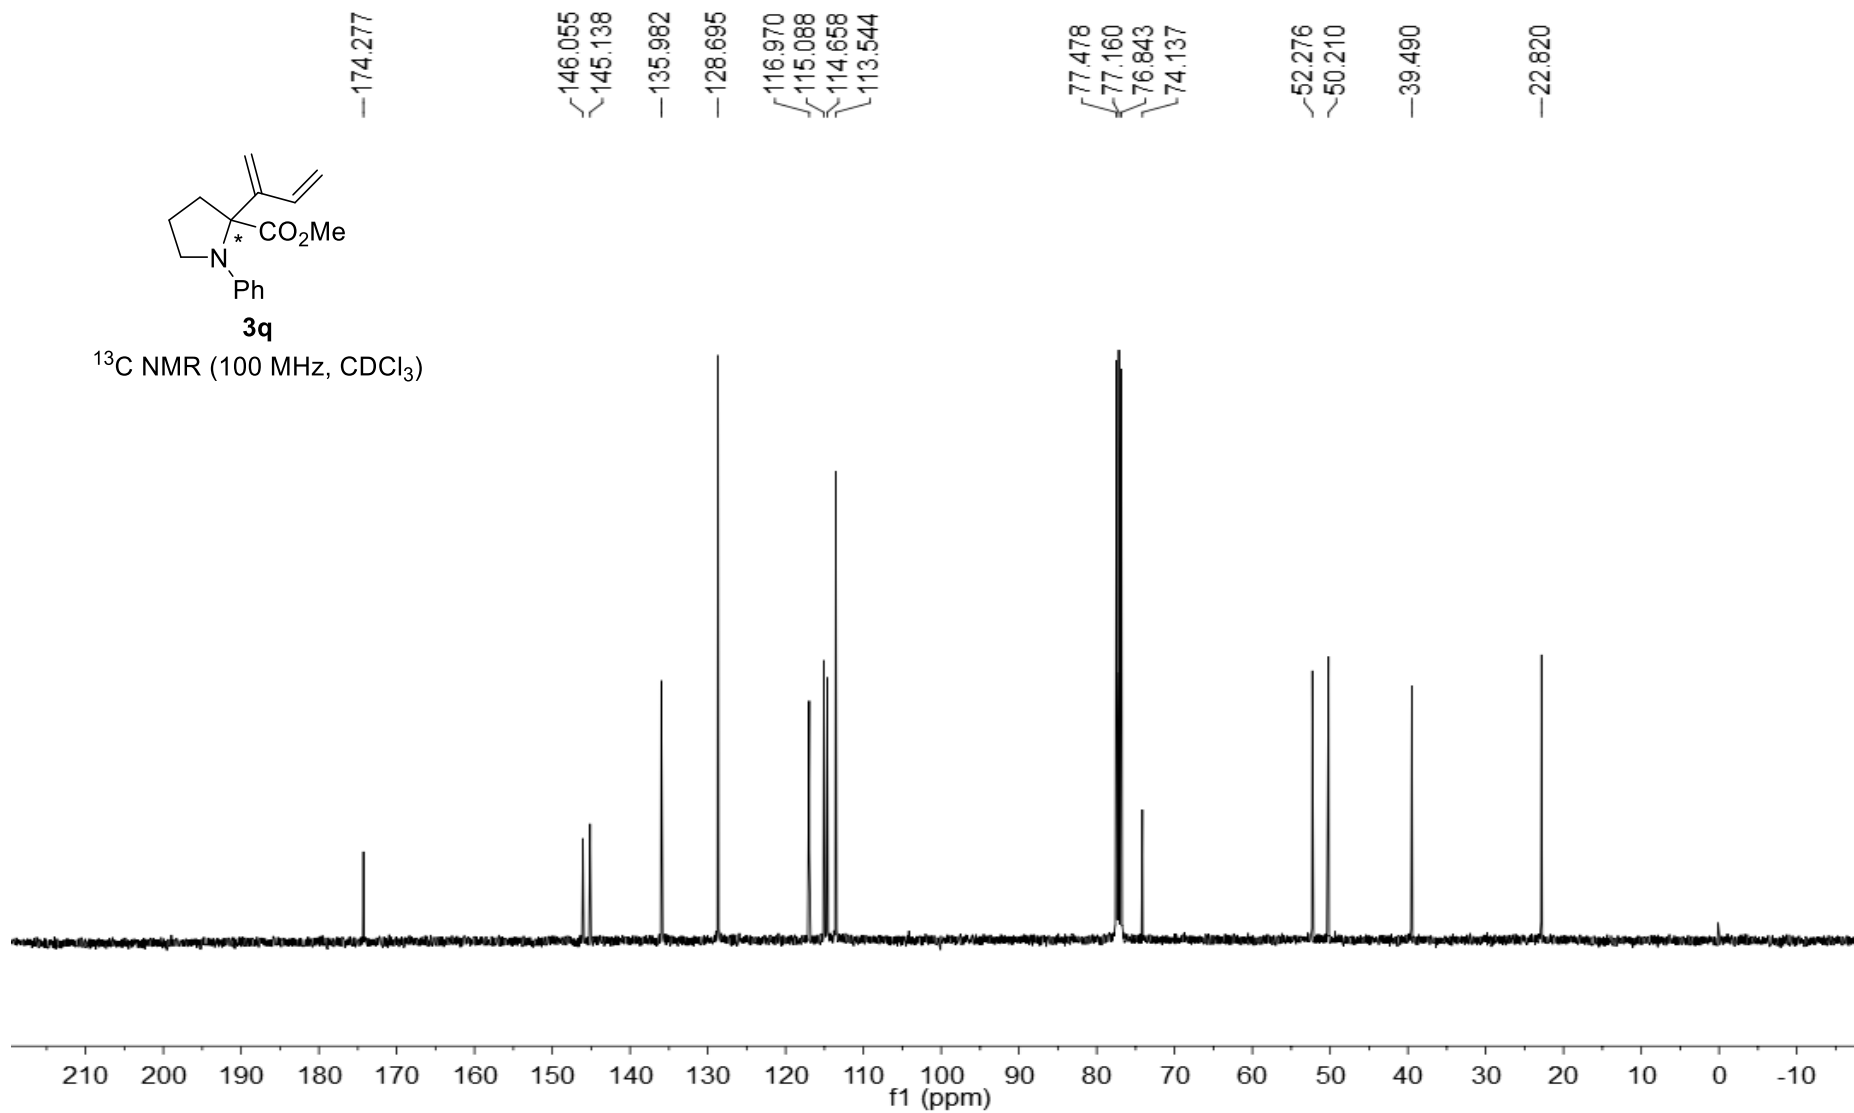

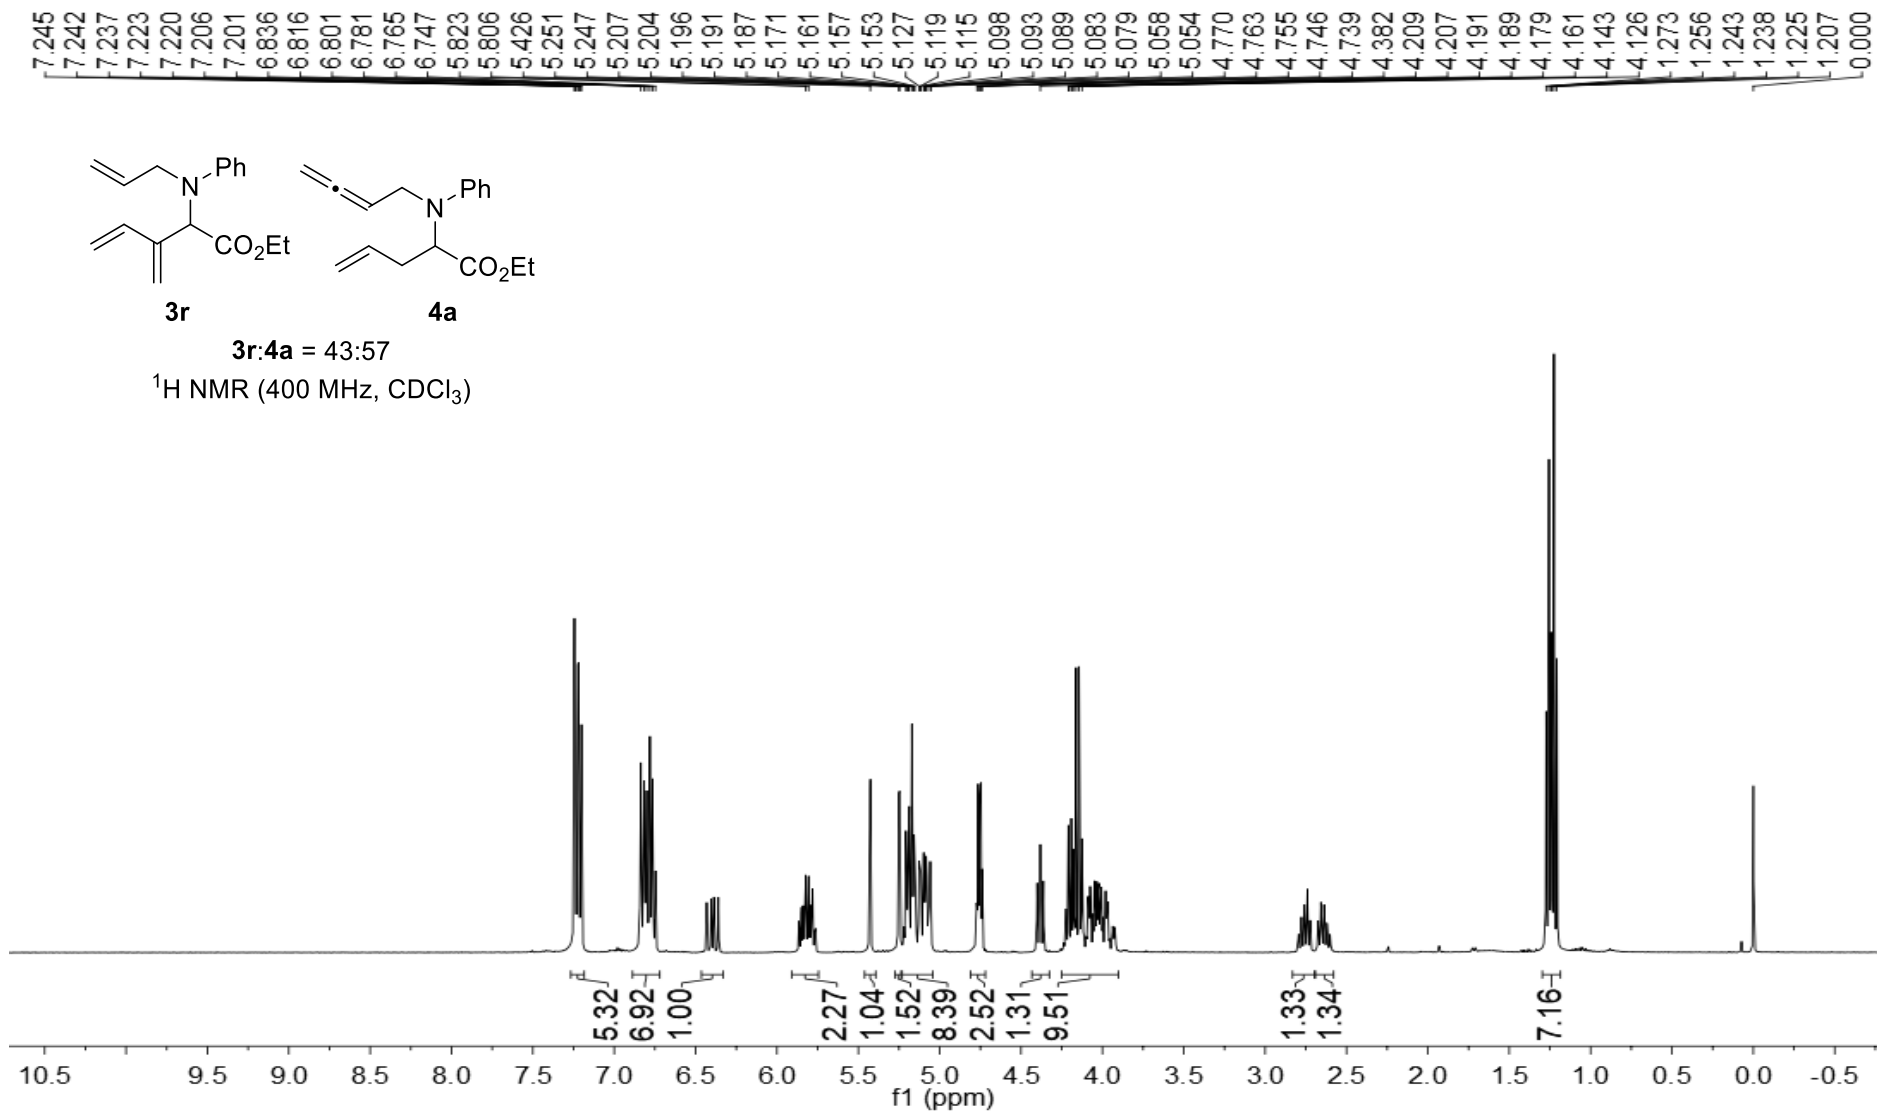



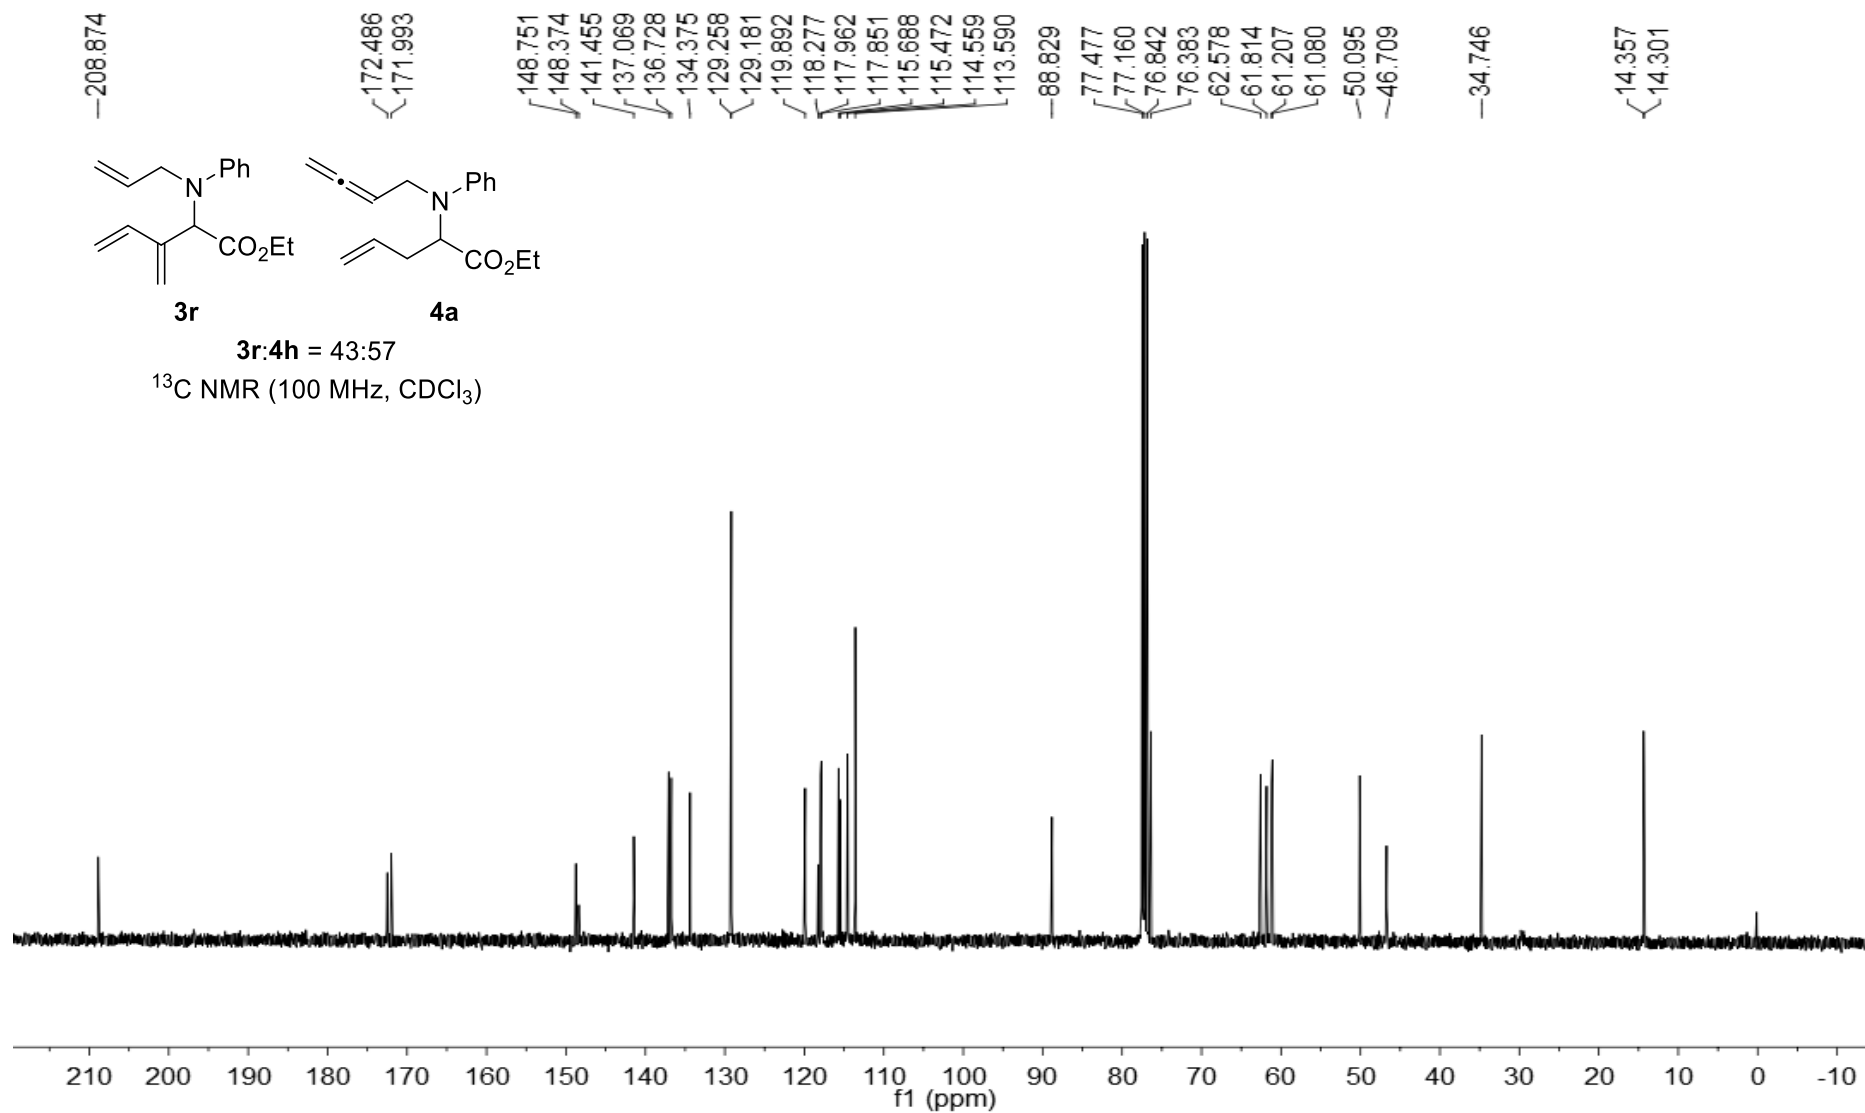

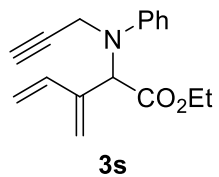

<sup>1</sup>H NMR (400 MHz, CDCl<sub>3</sub>)

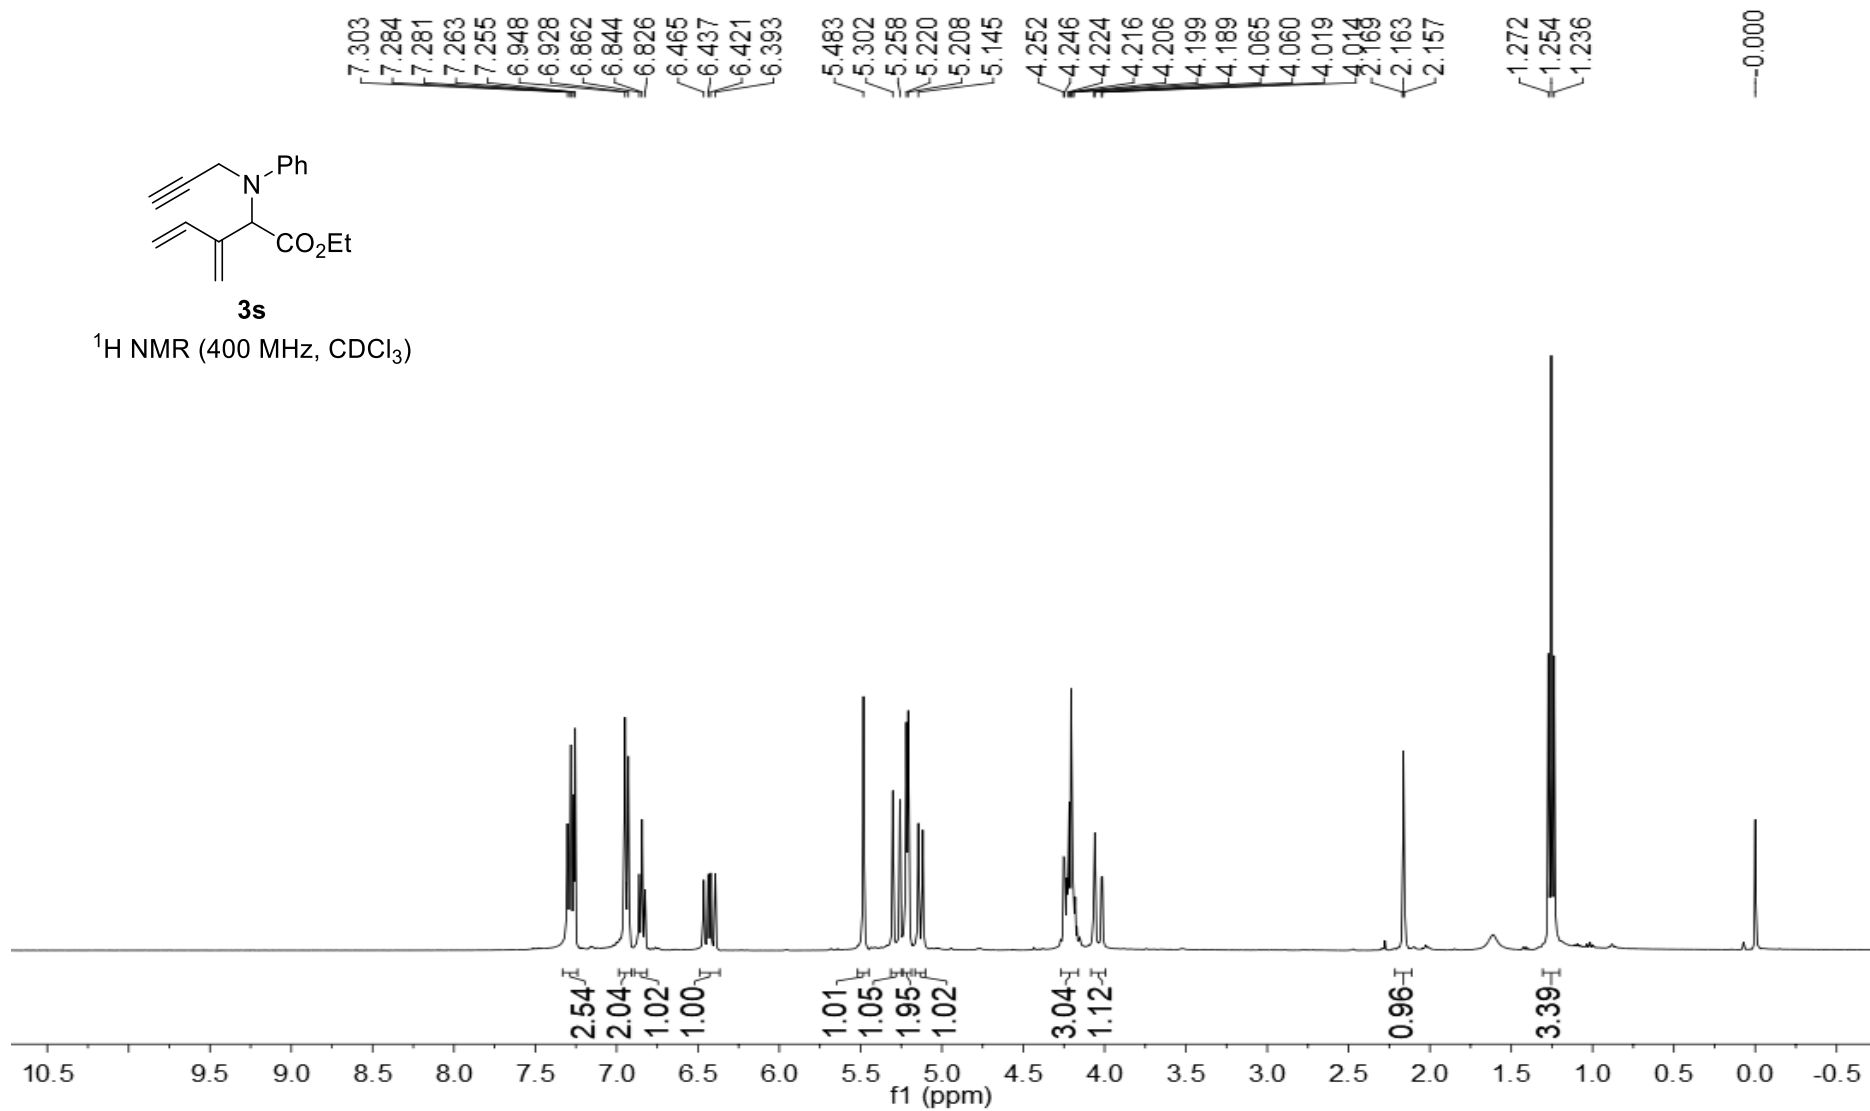

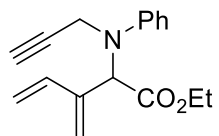

**3s**

$^{13}\text{C}$  NMR (100 MHz,  $\text{CDCl}_3$ )

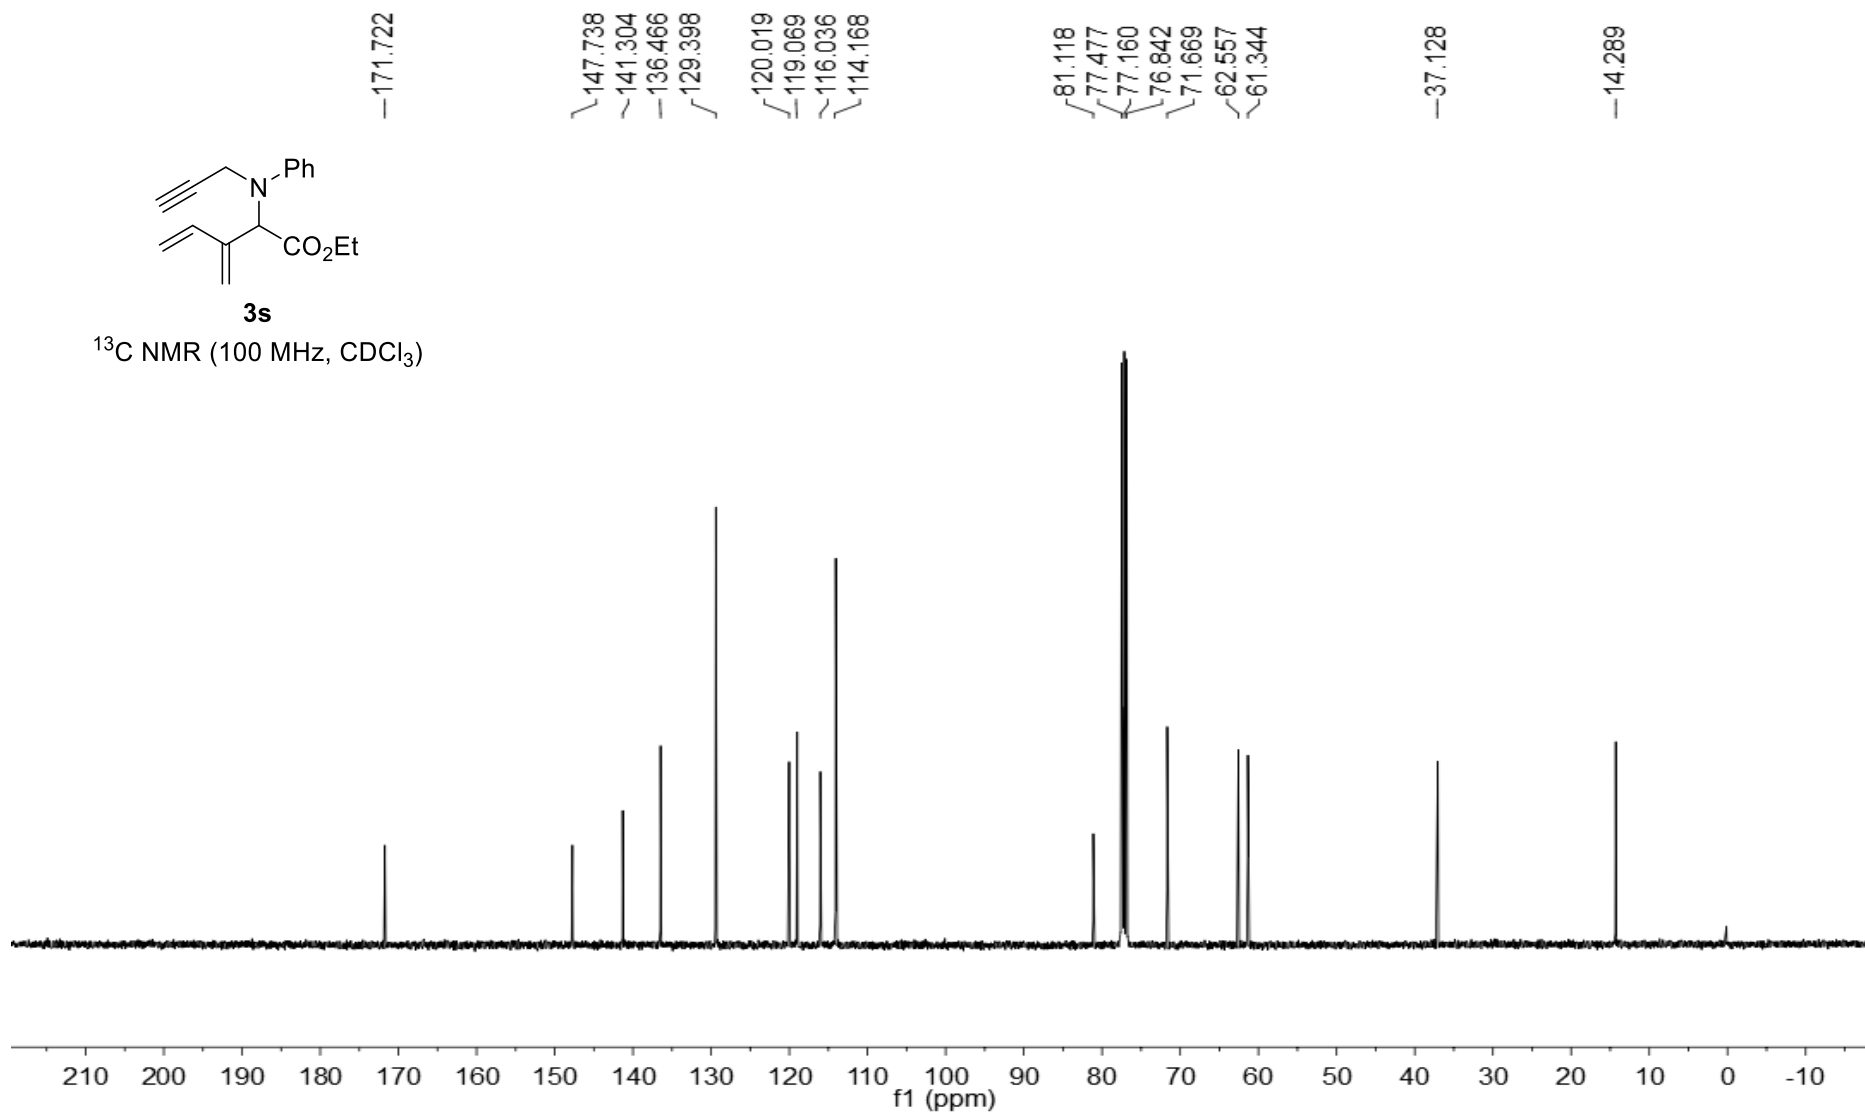

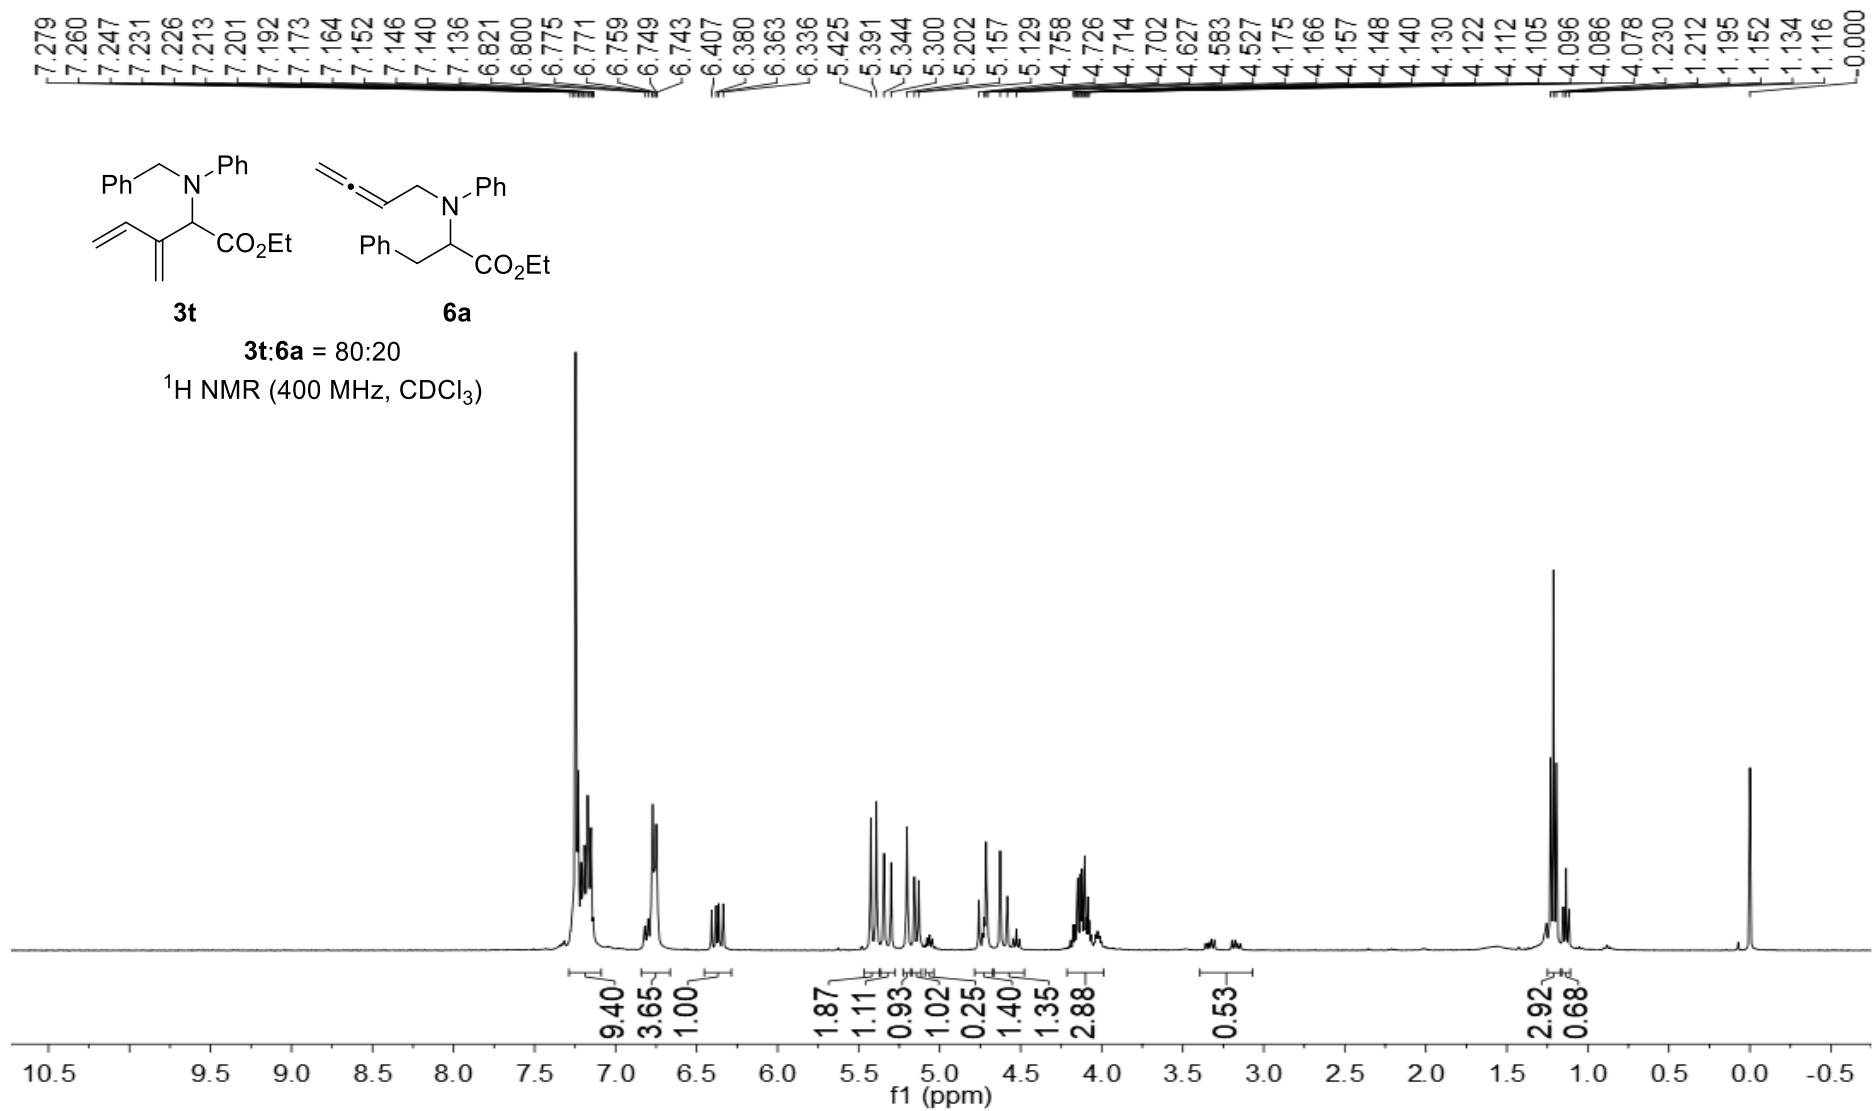

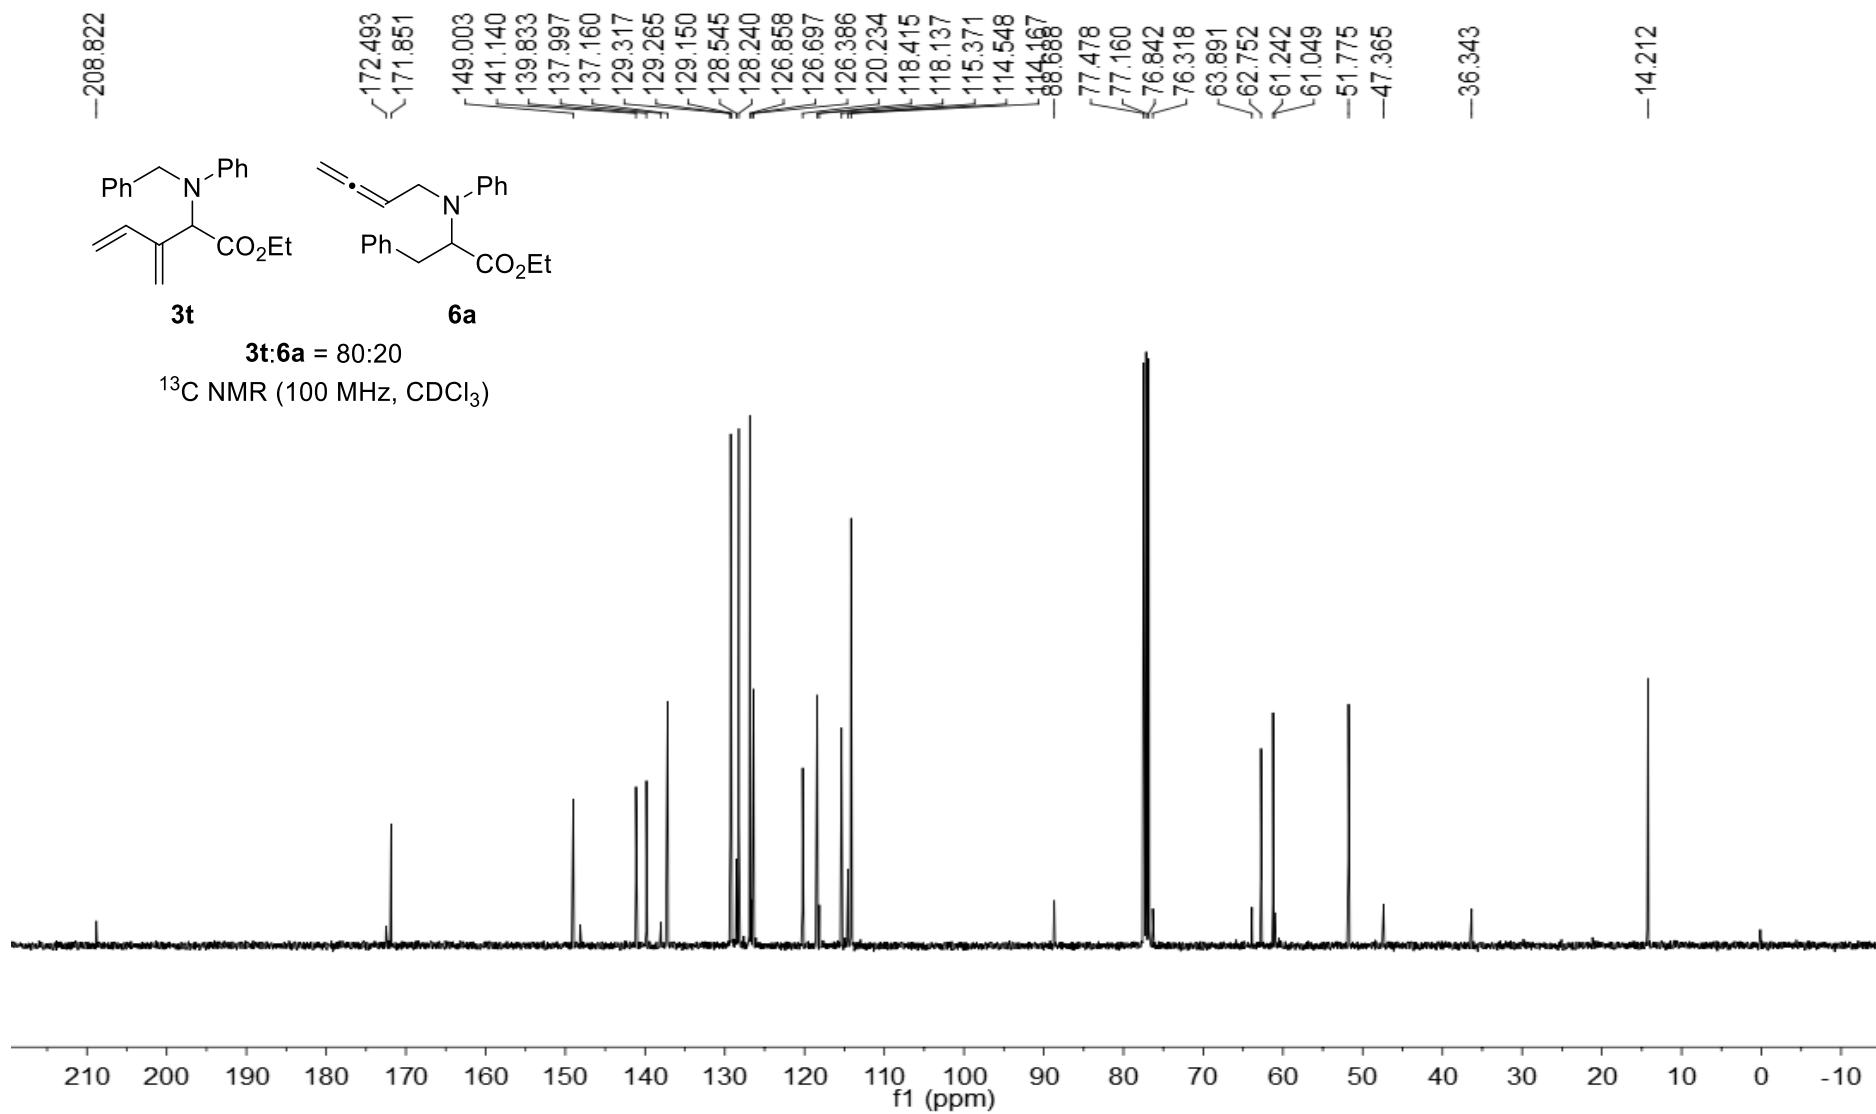

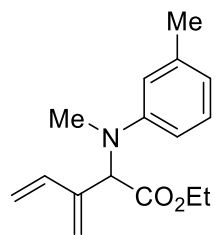

**3u**

<sup>1</sup>H NMR (400 MHz, CDCl<sub>3</sub>)

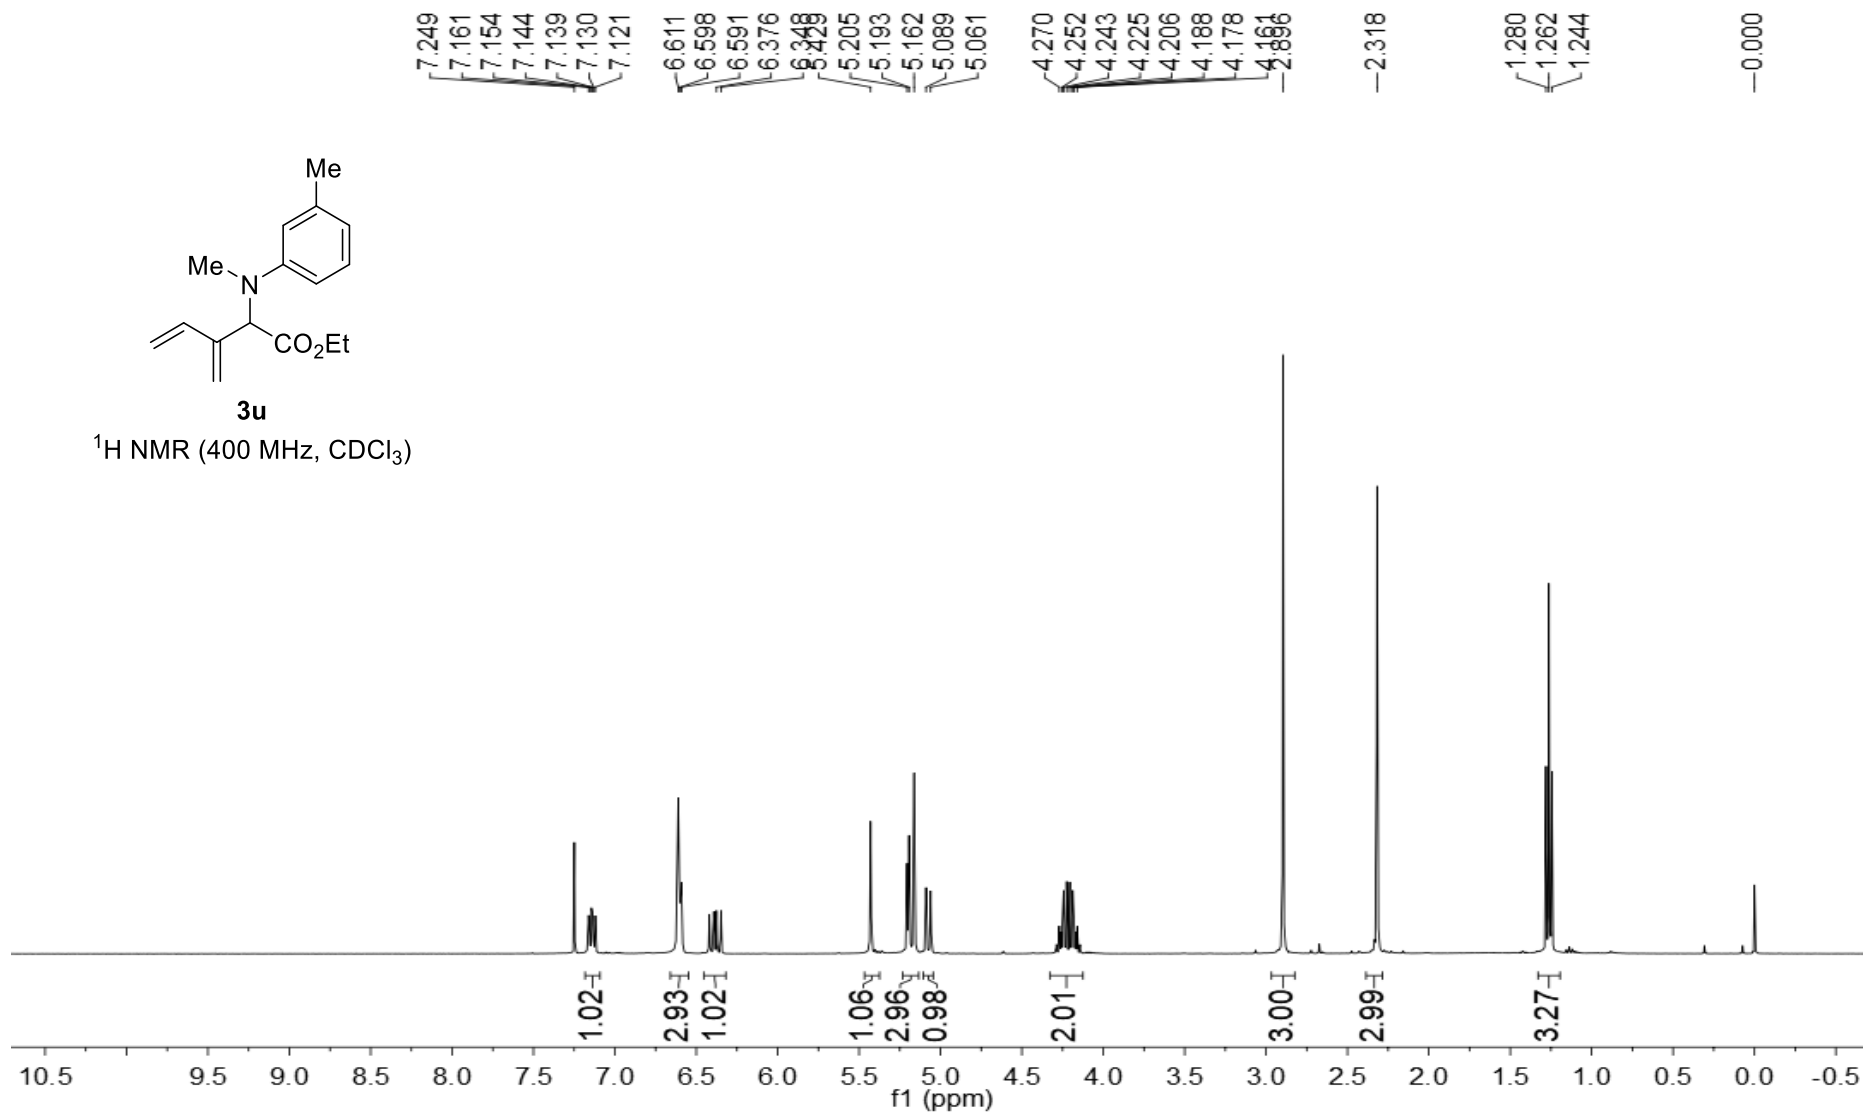

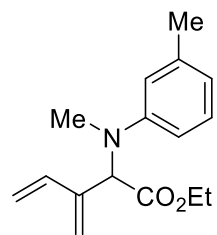

**3u**

<sup>13</sup>C NMR (100 MHz, CDCl<sub>3</sub>)

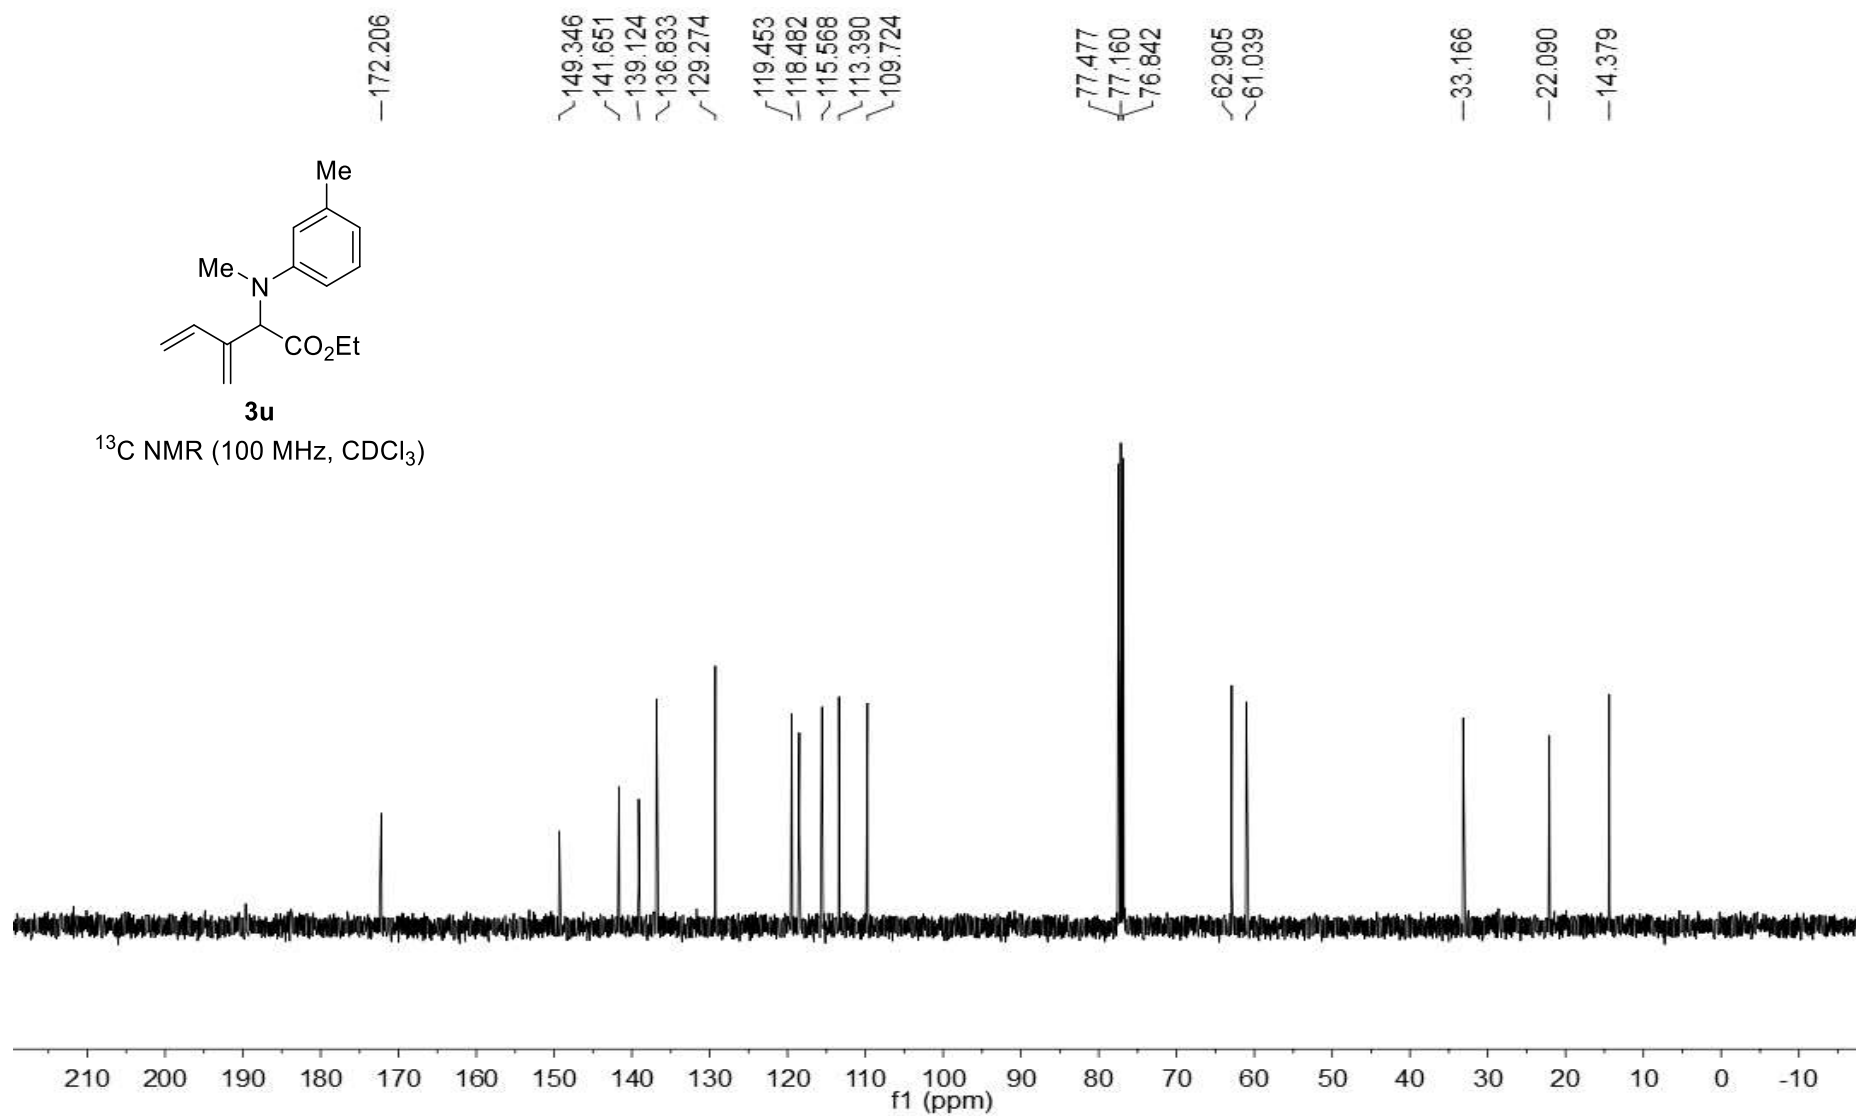

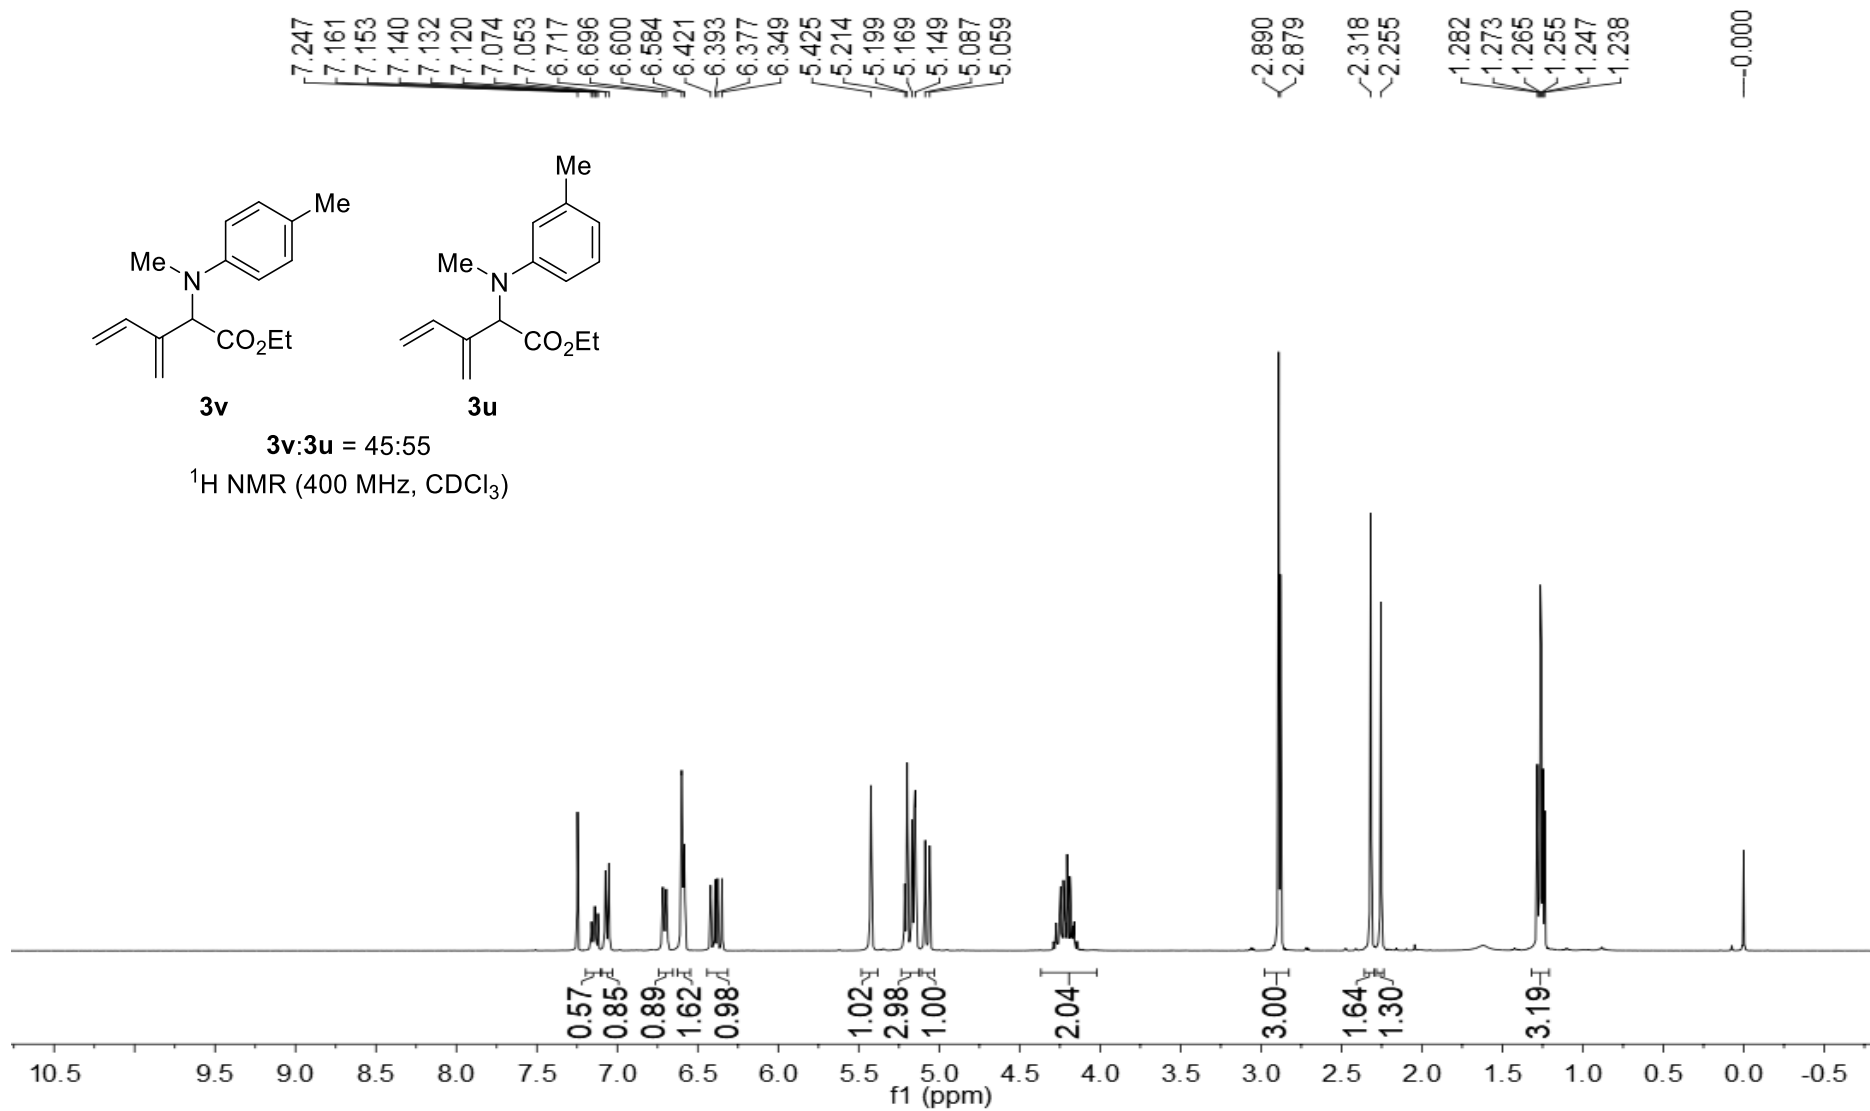



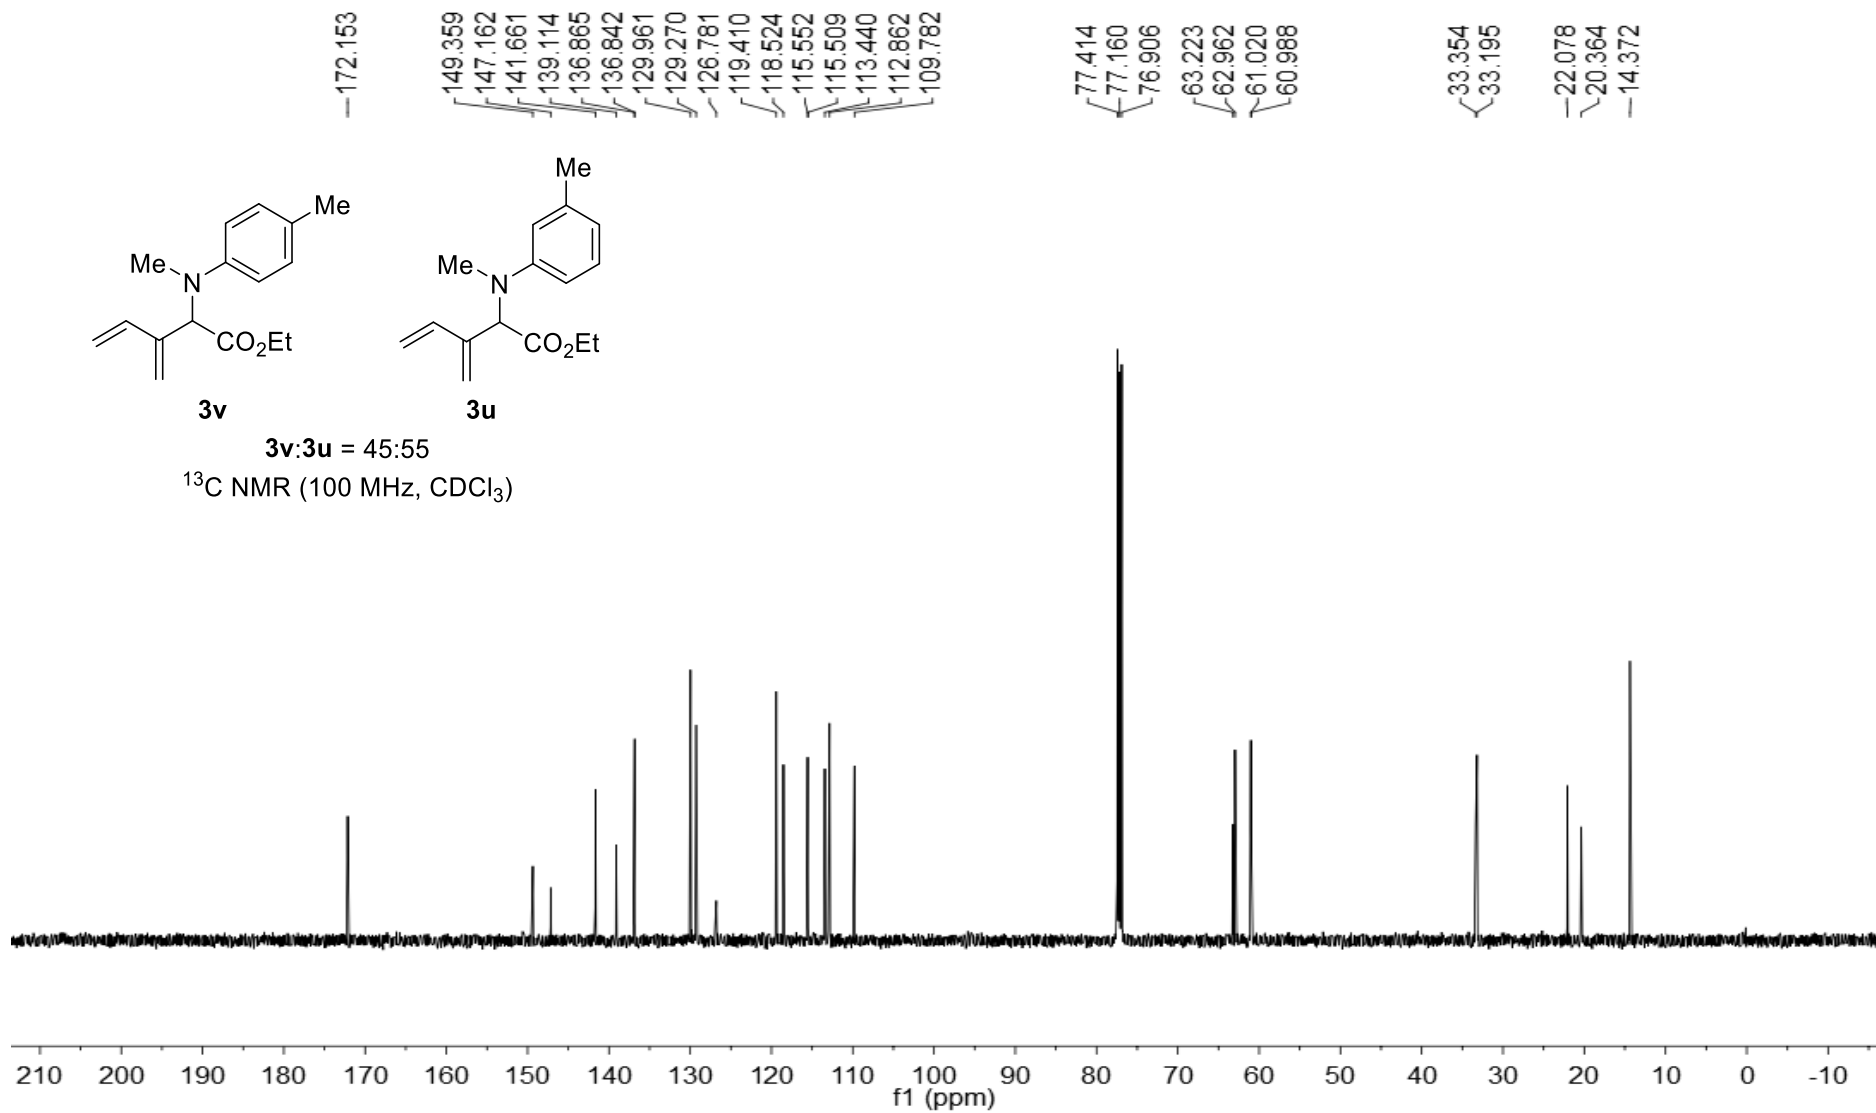

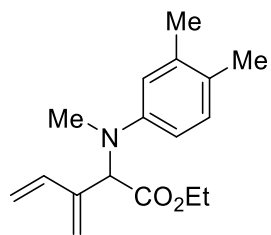

**3w**

<sup>1</sup>H NMR (400 MHz, CDCl<sub>3</sub>)

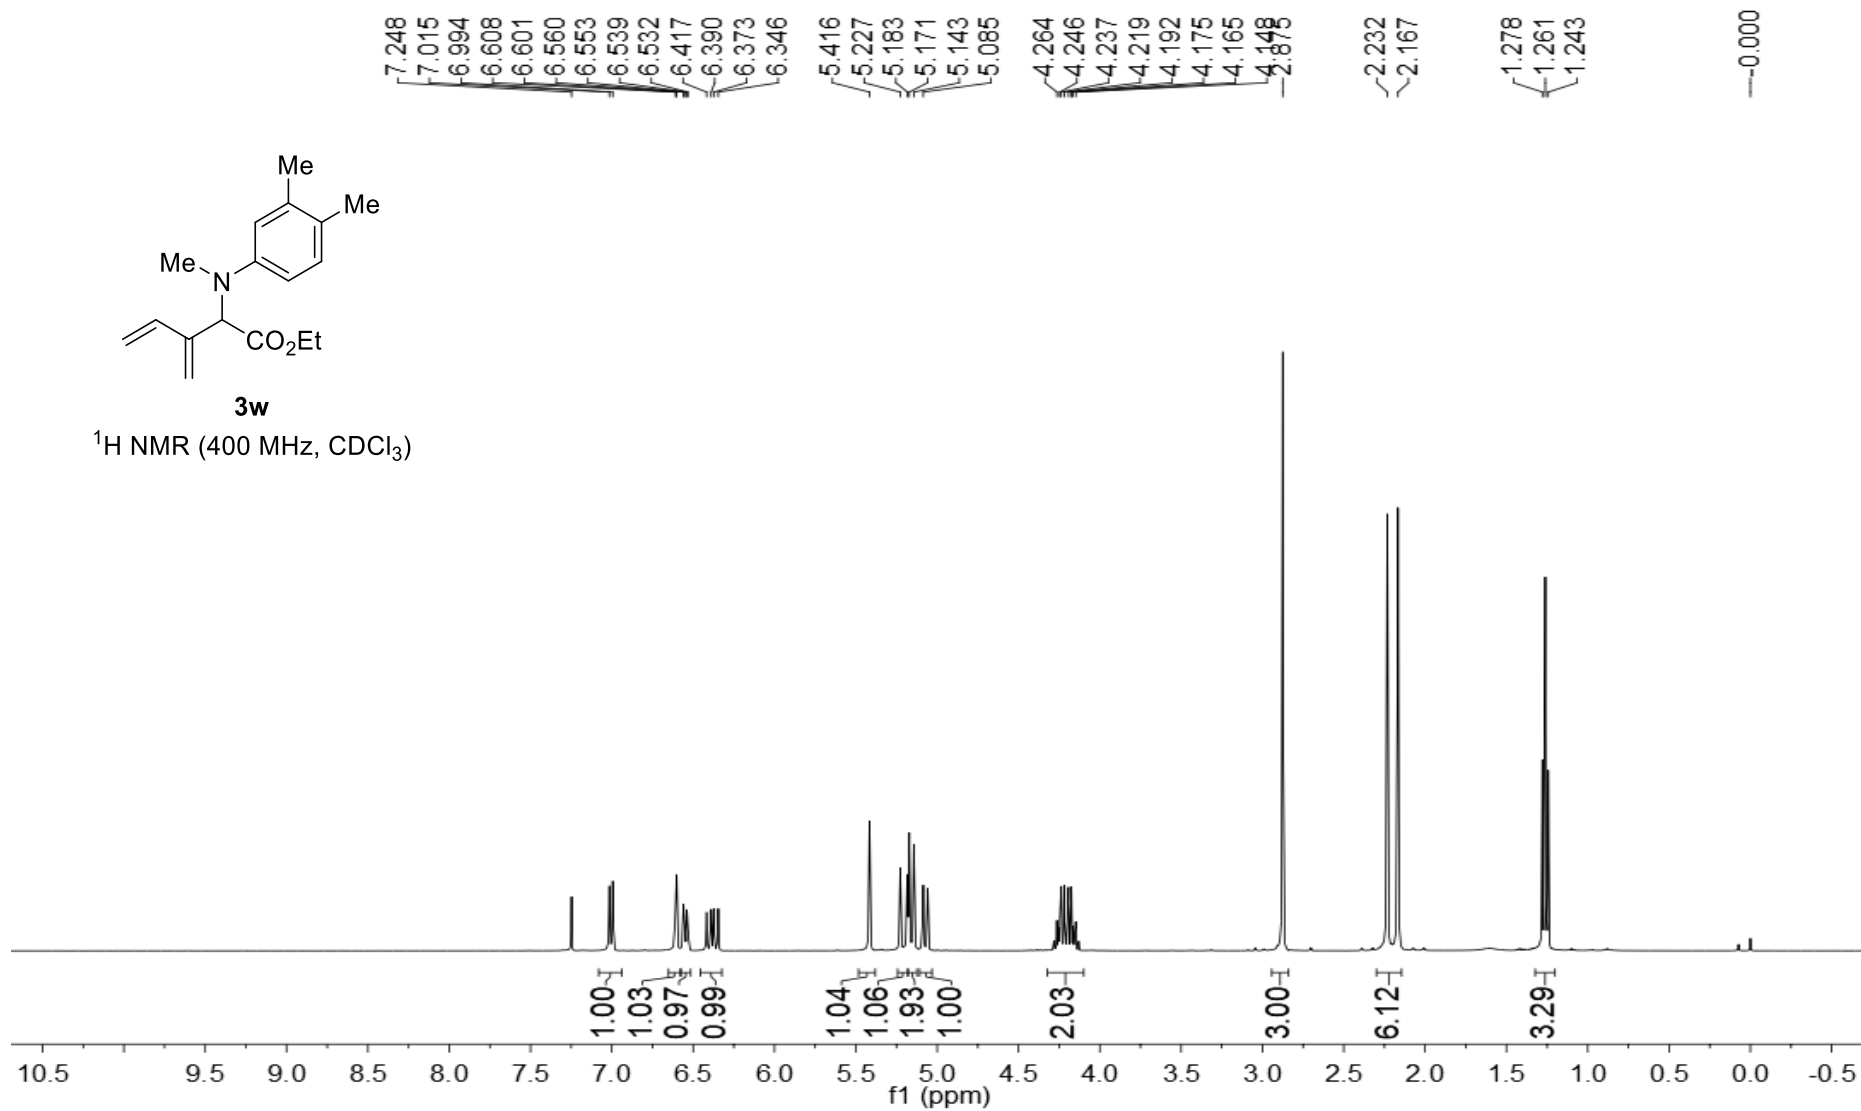

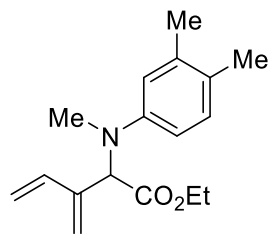

**3w**

<sup>13</sup>C NMR (100 MHz, CDCl<sub>3</sub>)

172.277

147.616  
141.790  
137.424  
136.879  
130.490  
125.524  
119.290  
115.543  
114.381  
110.155

77.478  
77.160  
76.842

63.105  
60.946

33.264

20.551  
18.732  
14.402

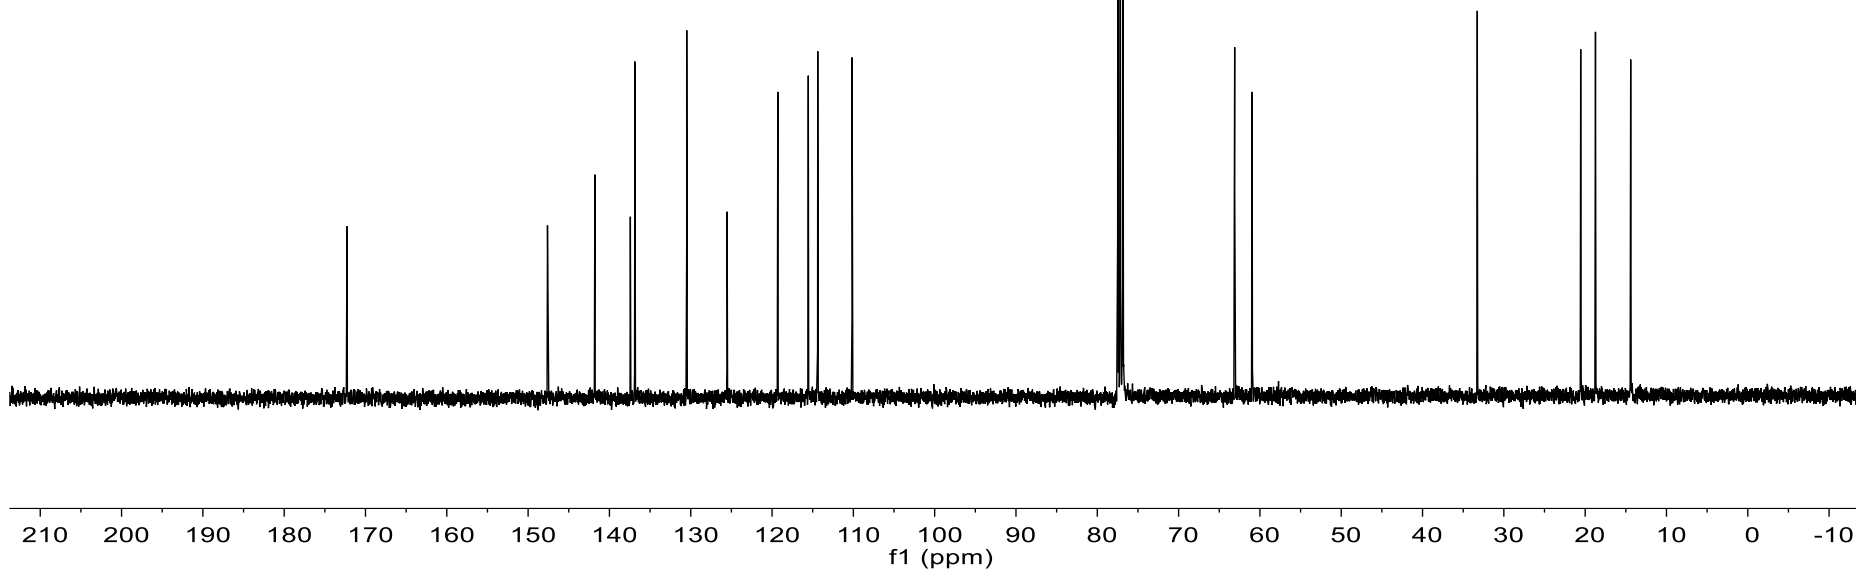

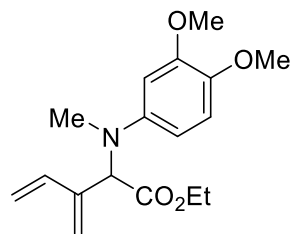

**3x**

<sup>1</sup>H NMR (400 MHz, CDCl<sub>3</sub>)

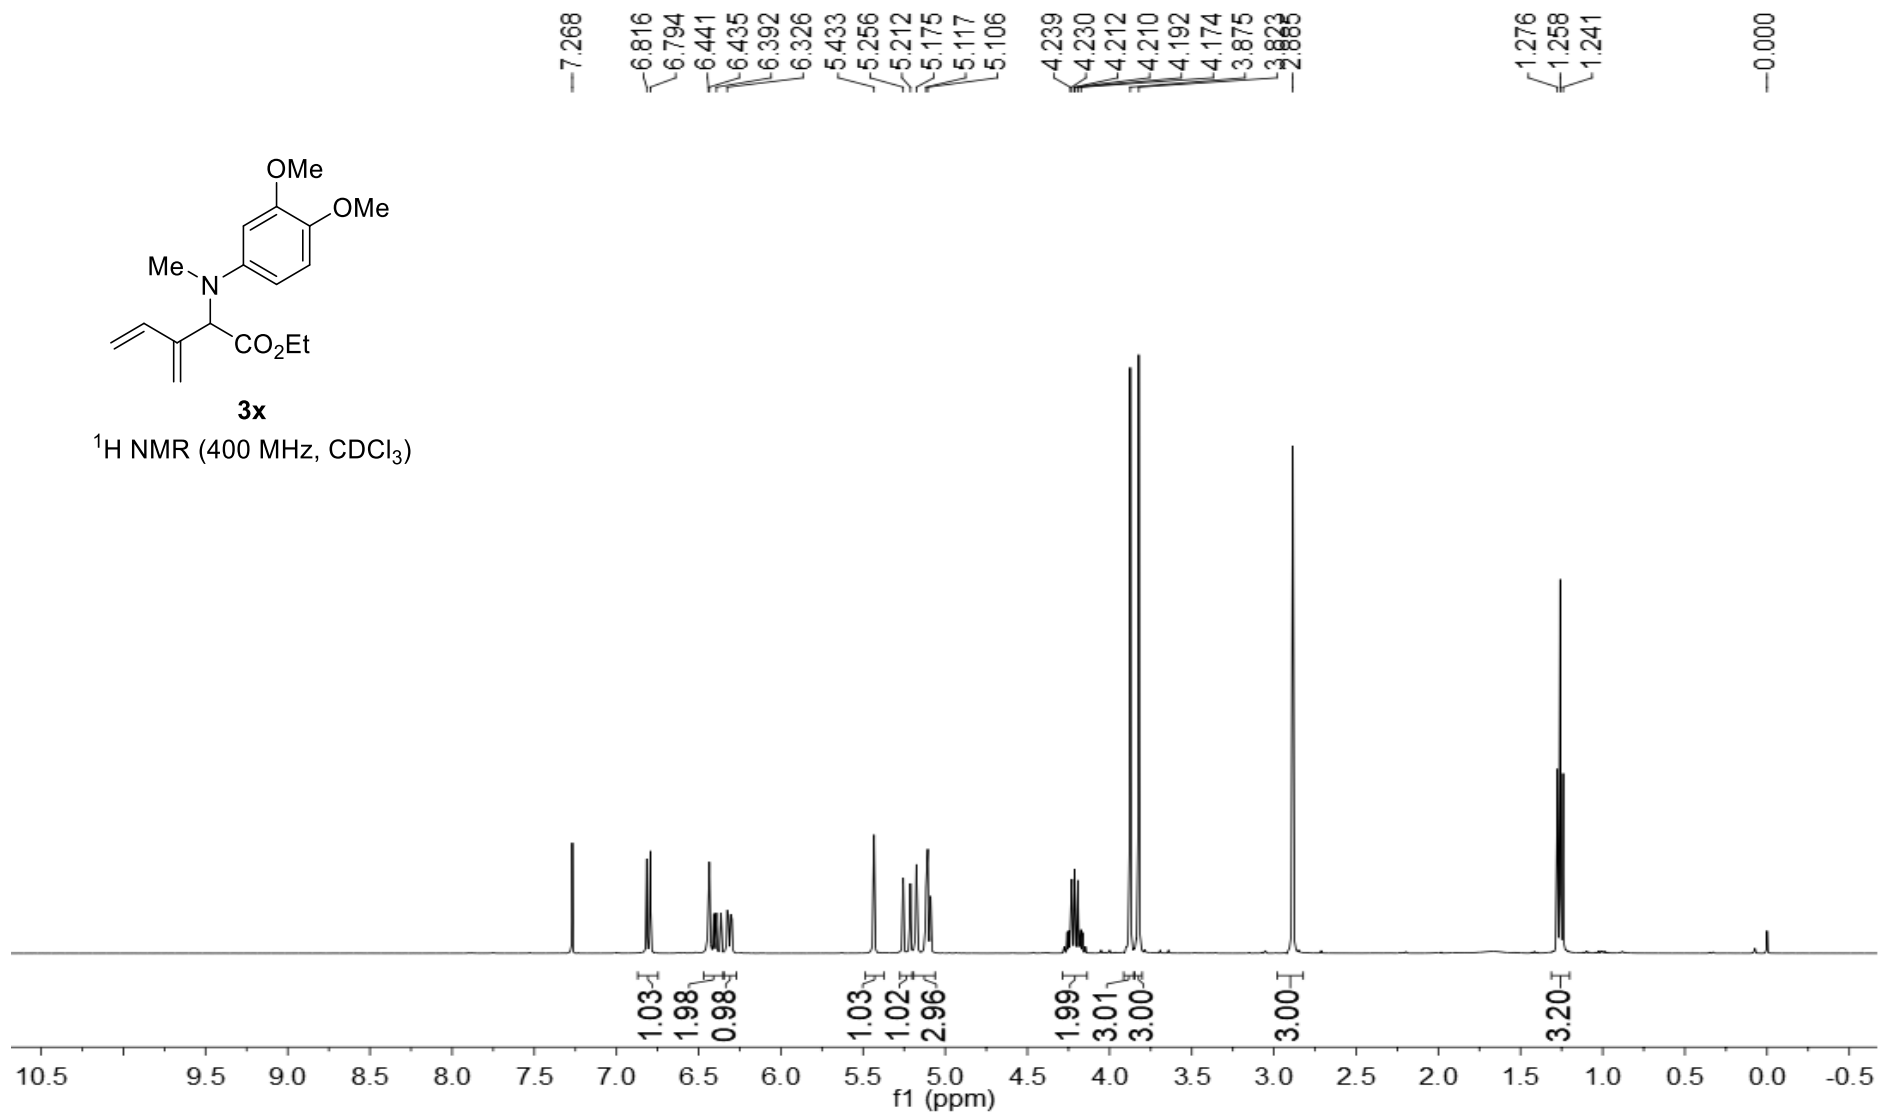

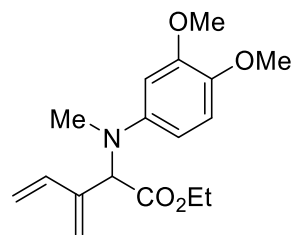

**3x**

<sup>13</sup>C NMR (100 MHz, CDCl<sub>3</sub>)

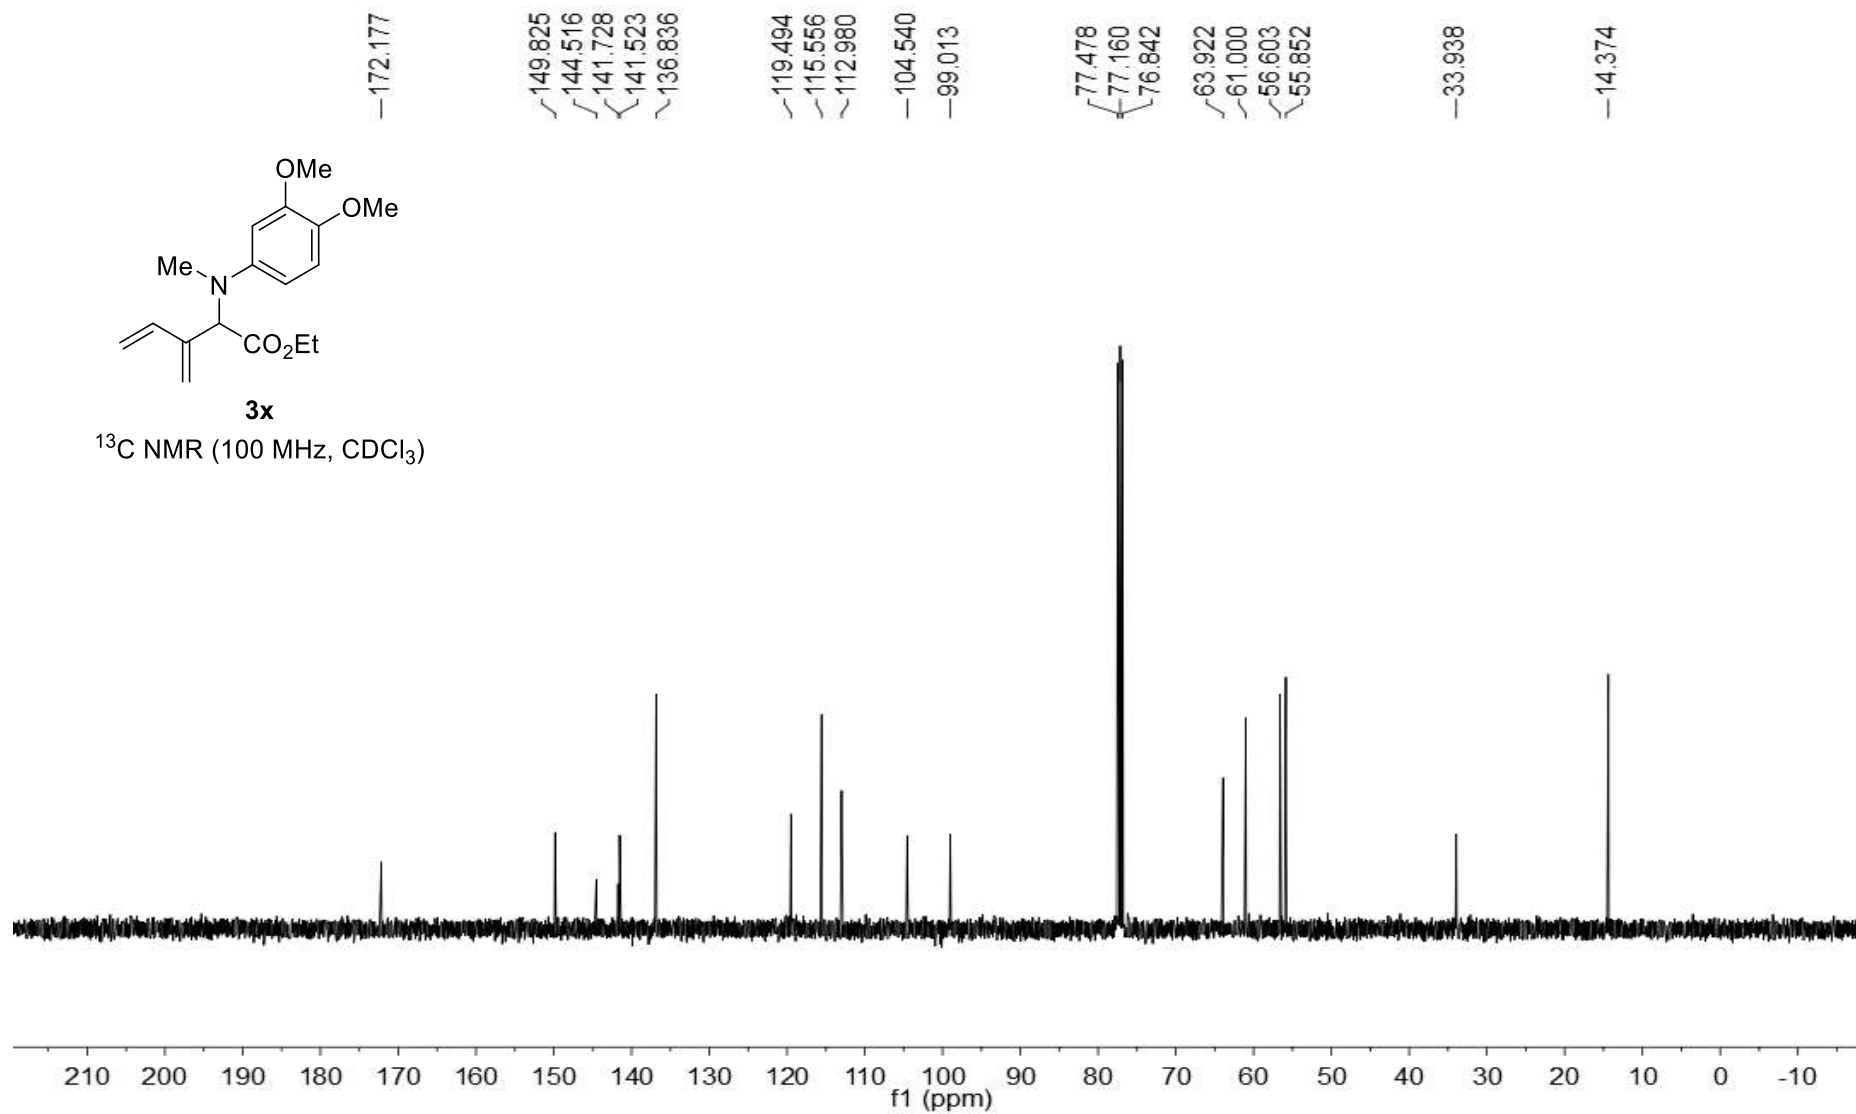

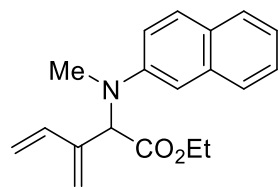

**3y**

<sup>1</sup>H NMR (400 MHz, CDCl<sub>3</sub>)

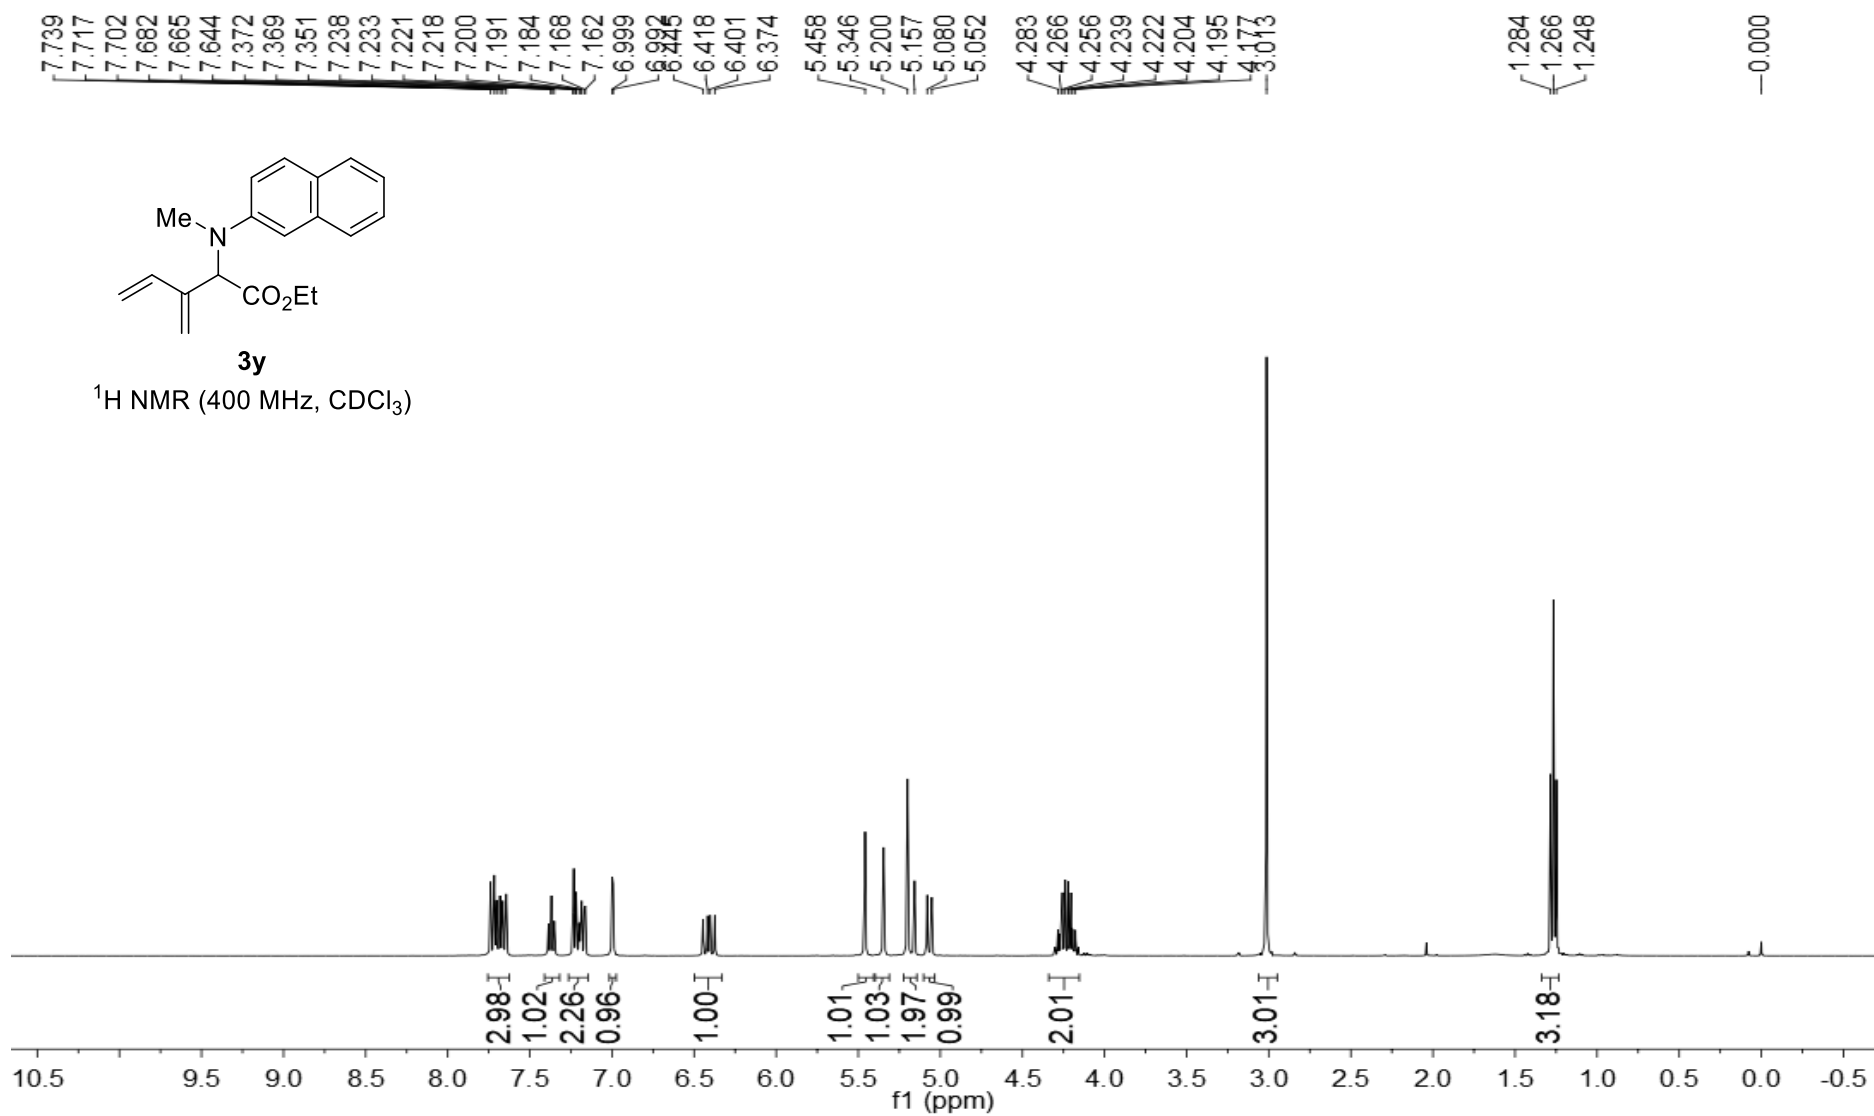

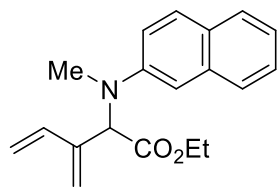

**3y**

$^{13}\text{C}$  NMR (100 MHz,  $\text{CDCl}_3$ )

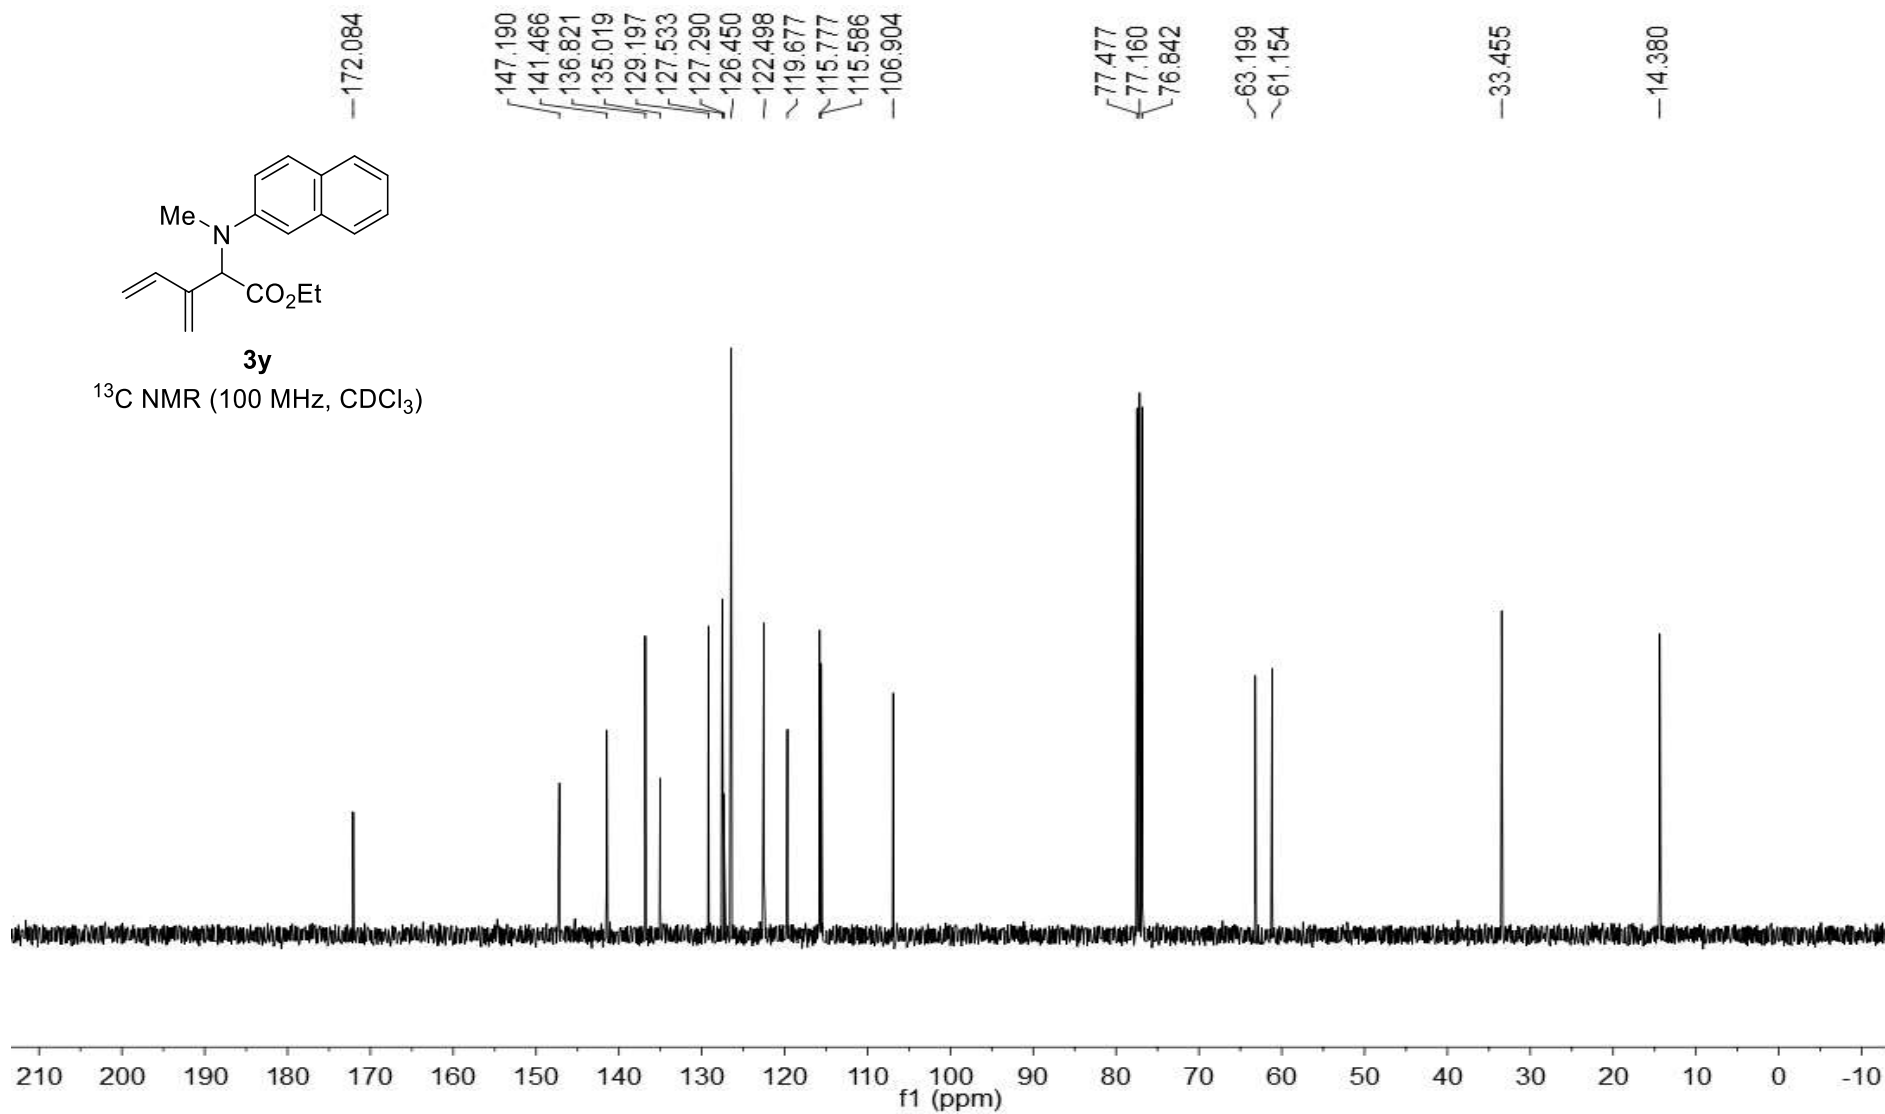

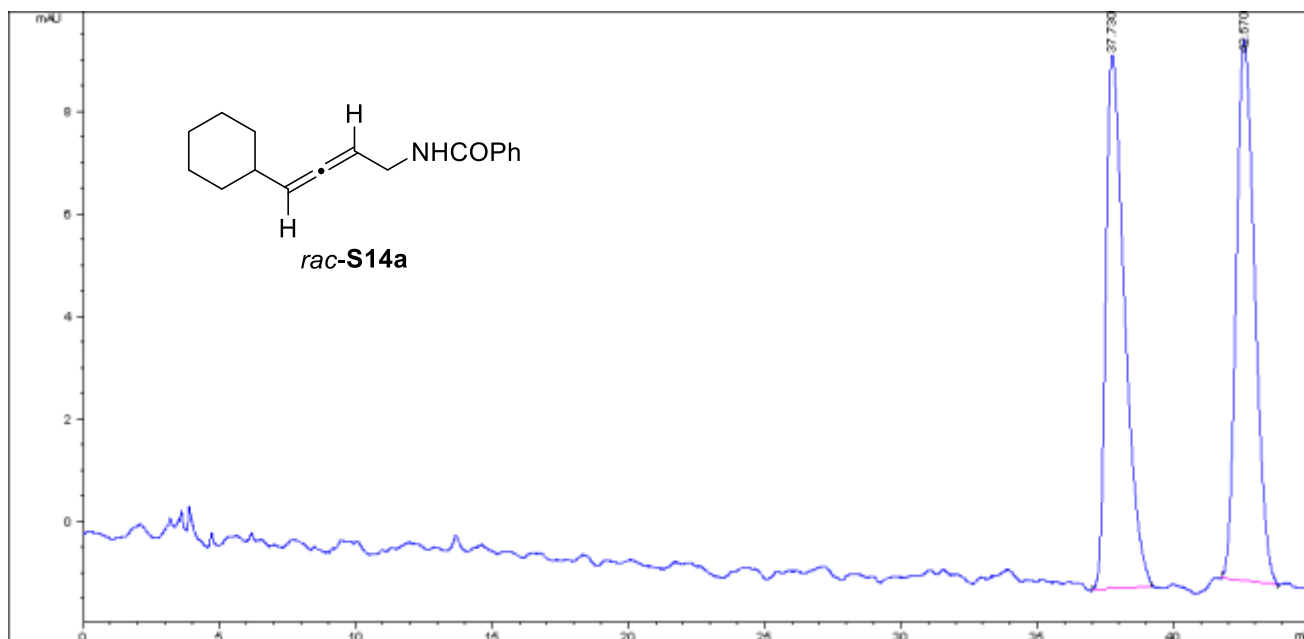

| Number | Time (min) | Area (mAU.s) | Height (mAU) | Width (min) | Symmetry factor | Area (%) |
|--------|------------|--------------|--------------|-------------|-----------------|----------|
| 1      | 37.73      | 502.6        | 10.4         | 0.6902      | 0.499           | 50.212   |
| 2      | 42.57      | 498.3        | 10.6         | 0.7069      | 0.729           | 49.788   |

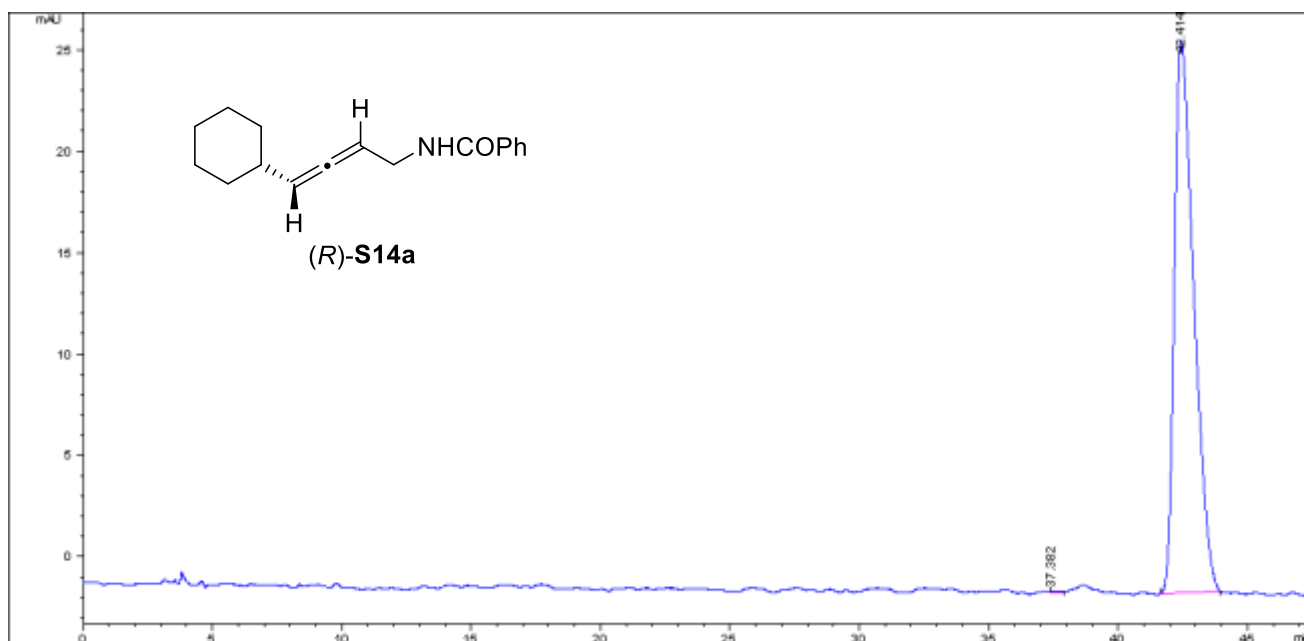

| Number | Time (min) | Area (mAU.s) | Height (mAU) | Width (min) | Symmetry factor | Area (%) |
|--------|------------|--------------|--------------|-------------|-----------------|----------|
| 1      | 37.382     | 2            | 5.3E-2       | 0.4704      | 0.259E-2        | 0.137    |
| 2      | 42.414     | 1426.1       | 27.3         | 0.7597      | 0.5             | 99.863   |



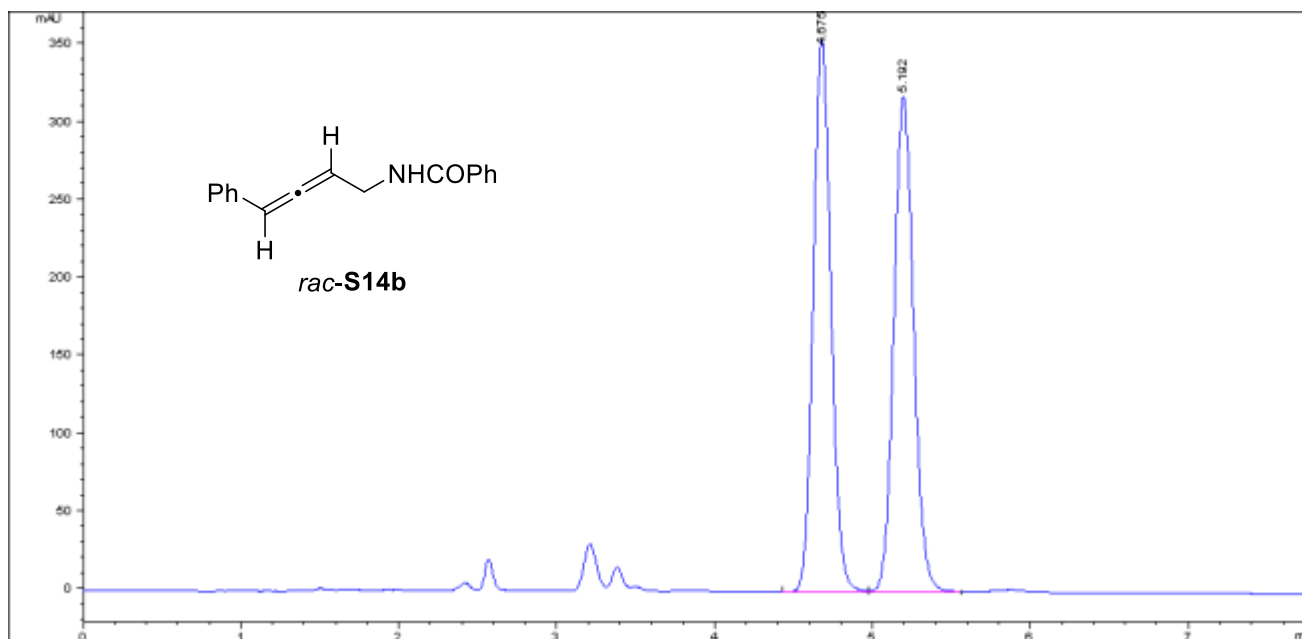

| Number | Time (min) | Area (mAU.s) | Height (mAU) | Width (min) | Symmetry factor | Area (%) |
|--------|------------|--------------|--------------|-------------|-----------------|----------|
| 1      | 4.675      | 2775.5       | 355.2        | 0.1217      | 0.883           | 49.975   |
| 2      | 5.192      | 2778.3       | 318.2        | 0.1354      | 0.889           | 50.025   |

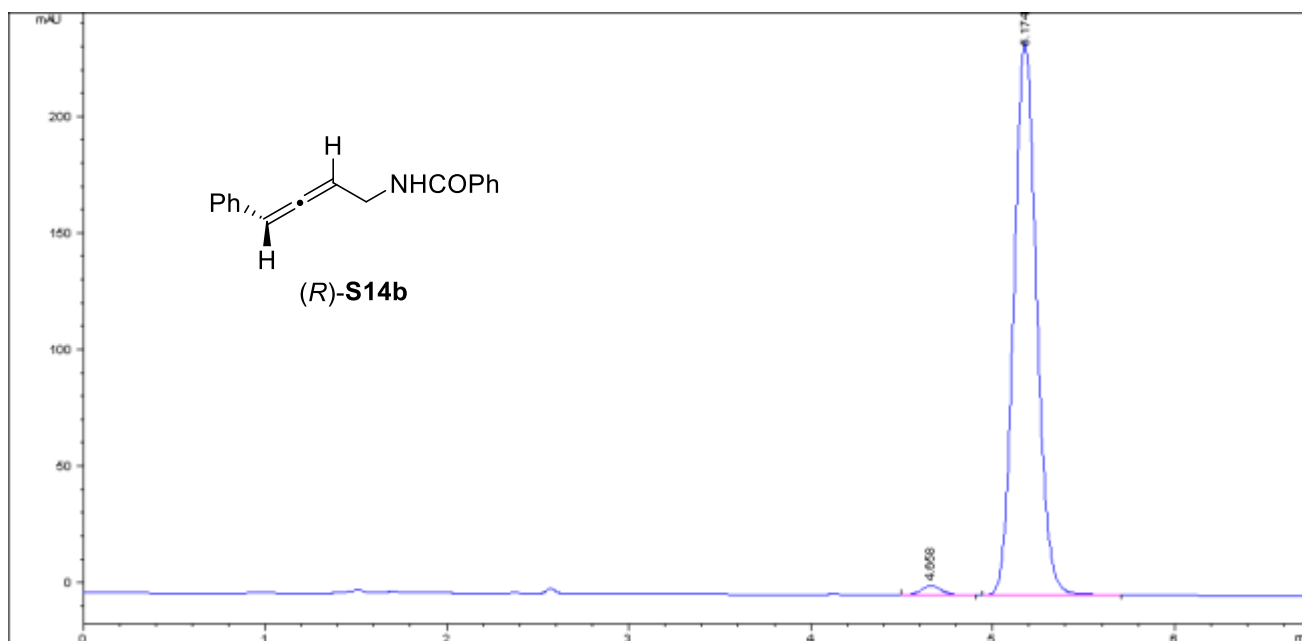

| Number | Time (min) | Area (mAU.s) | Height (mAU) | Width (min) | Symmetry factor | Area (%) |
|--------|------------|--------------|--------------|-------------|-----------------|----------|
| 1      | 4.658      | 31.5         | 4            | 0.1224      | 0.902           | 1.499    |
| 2      | 5.174      | 2066.3       | 238          | 0.1348      | 0.884           | 98.501   |

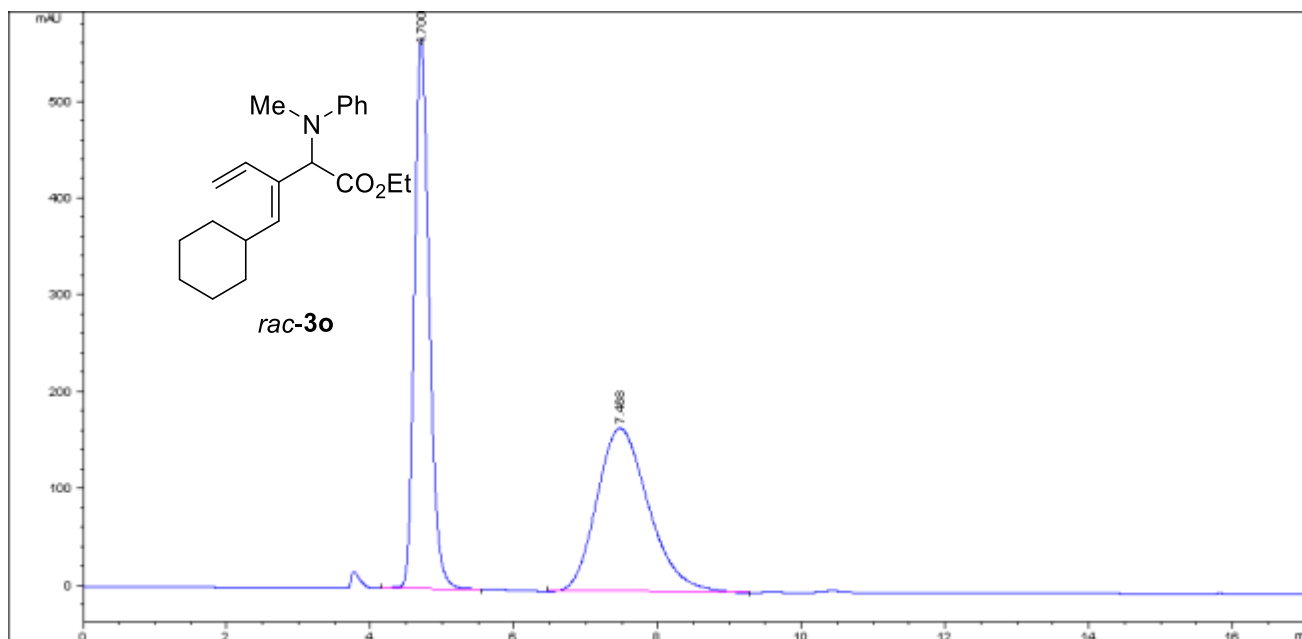

| Number | Time (min) | Area (mAU.s) | Height (mAU) | Width (min) | Symmetry factor | Area (%) |
|--------|------------|--------------|--------------|-------------|-----------------|----------|
| 1      | 4.7        | 8235.4       | 568.5        | 0.2243      | 0.778           | 49.100   |
| 2      | 7.468      | 8537.2       | 169.2        | 0.781       | 0.768           | 50.900   |

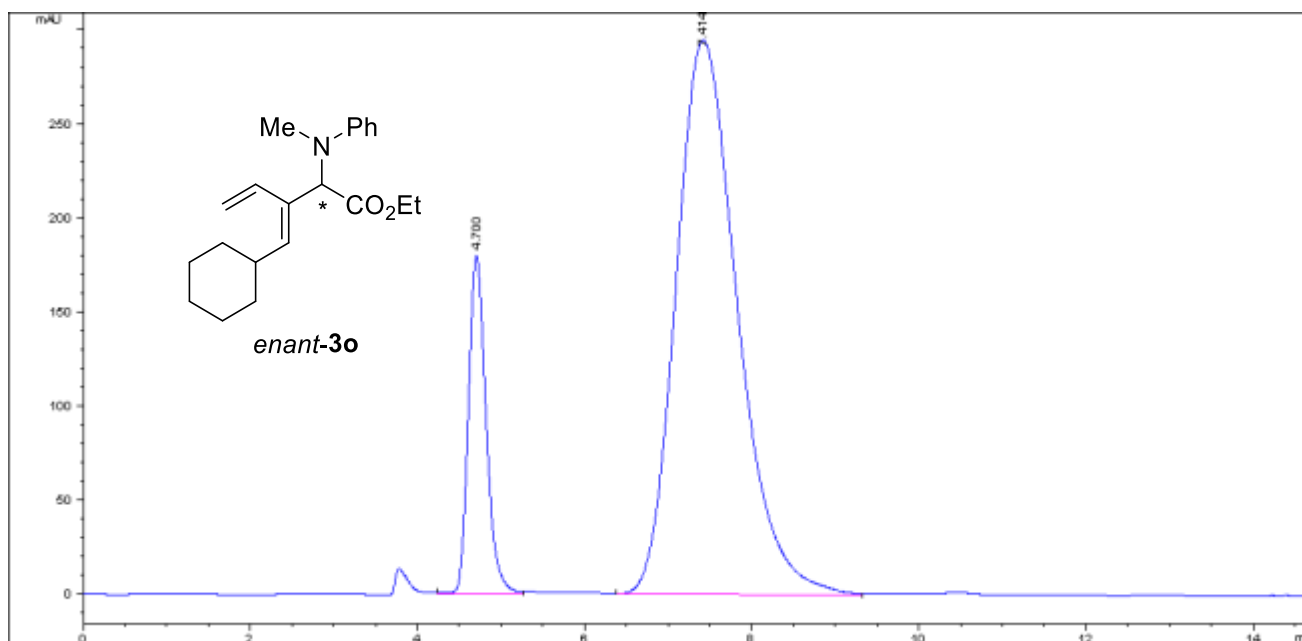

| Number | Time (min) | Area (mAU.s) | Height (mAU) | Width (min) | Symmetry factor | Area (%) |
|--------|------------|--------------|--------------|-------------|-----------------|----------|
| 1      | 4.7        | 2682.5       | 180.7        | 0.2285      | 0.772           | 15.080   |
| 2      | 7.414      | 15105.8      | 295.1        | 0.7894      | 0.751           | 84.920   |

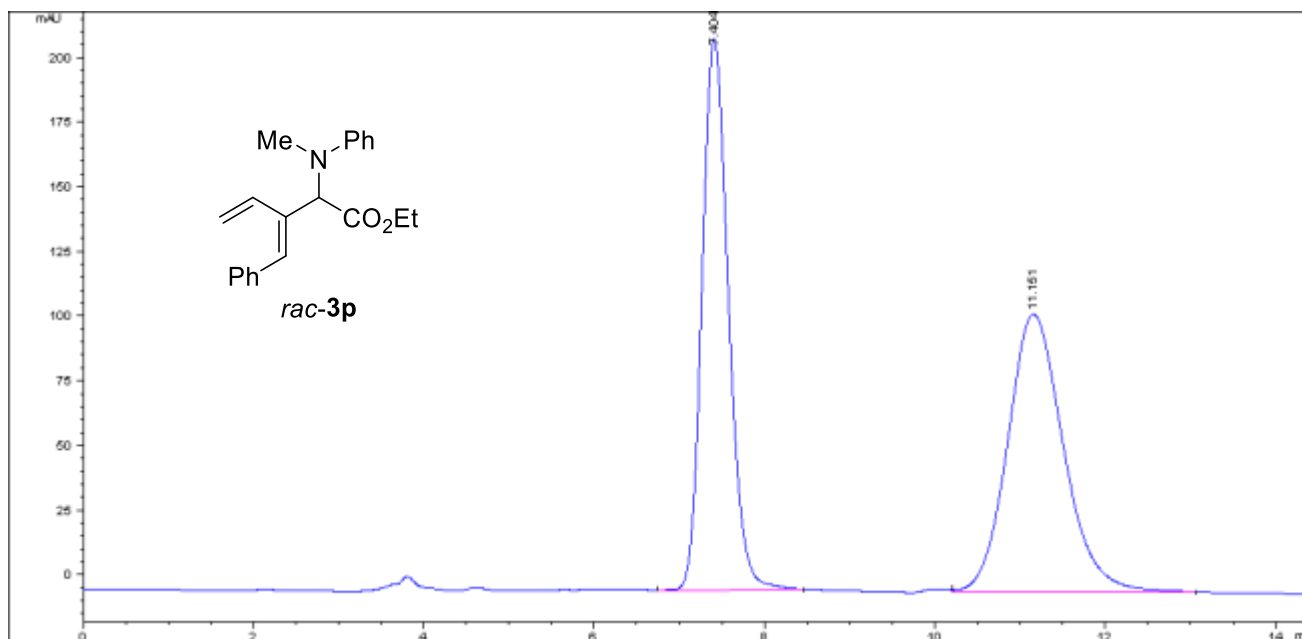

| Number | Time (min) | Area (mAU.s) | Height (mAU) | Width (min) | Symmetry factor | Area (%) |
|--------|------------|--------------|--------------|-------------|-----------------|----------|
| 1      | 7.404      | 4581         | 213          | 0.3324      | 0.811           | 48.230   |
| 2      | 11.151     | 4917.3       | 107.6        | 0.7007      | 0.82            | 51.770   |

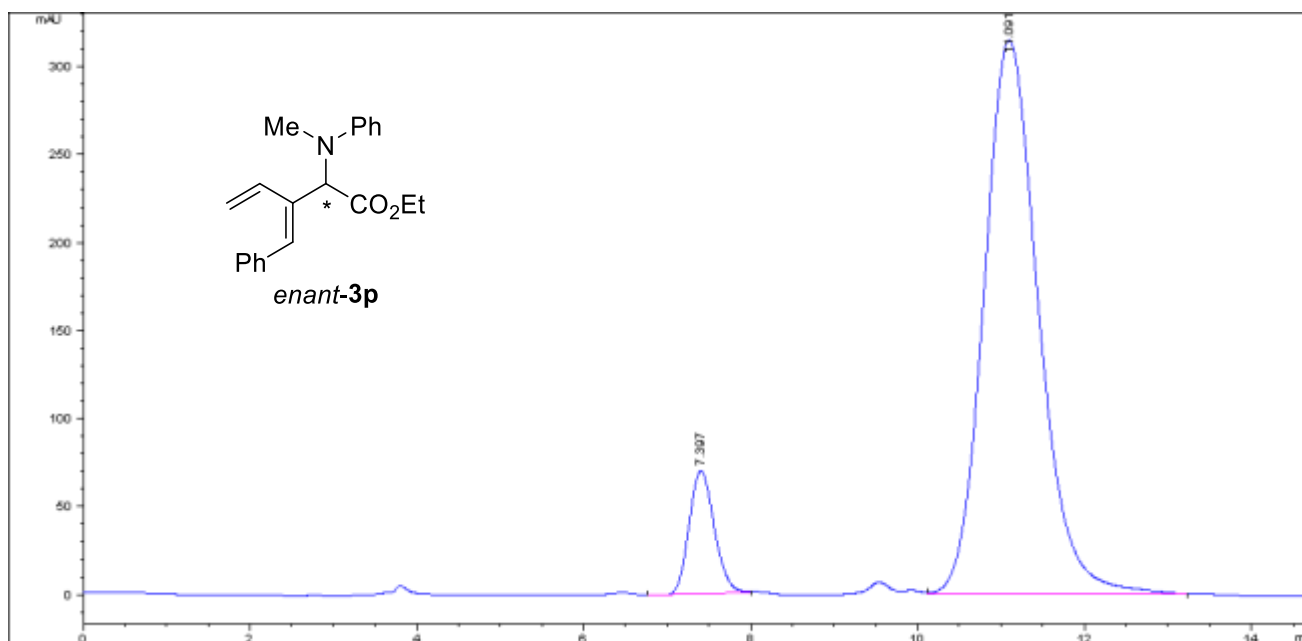

| Number | Time (min) | Area (mAU.s) | Height (mAU) | Width (min) | Symmetry factor | Area (%) |
|--------|------------|--------------|--------------|-------------|-----------------|----------|
| 1      | 7.397      | 1471.2       | 70.1         | 0.3263      | 0.83            | 9.338    |
| 2      | 11.091     | 14283.3      | 314.8        | 0.6983      | 0.809           | 90.662   |

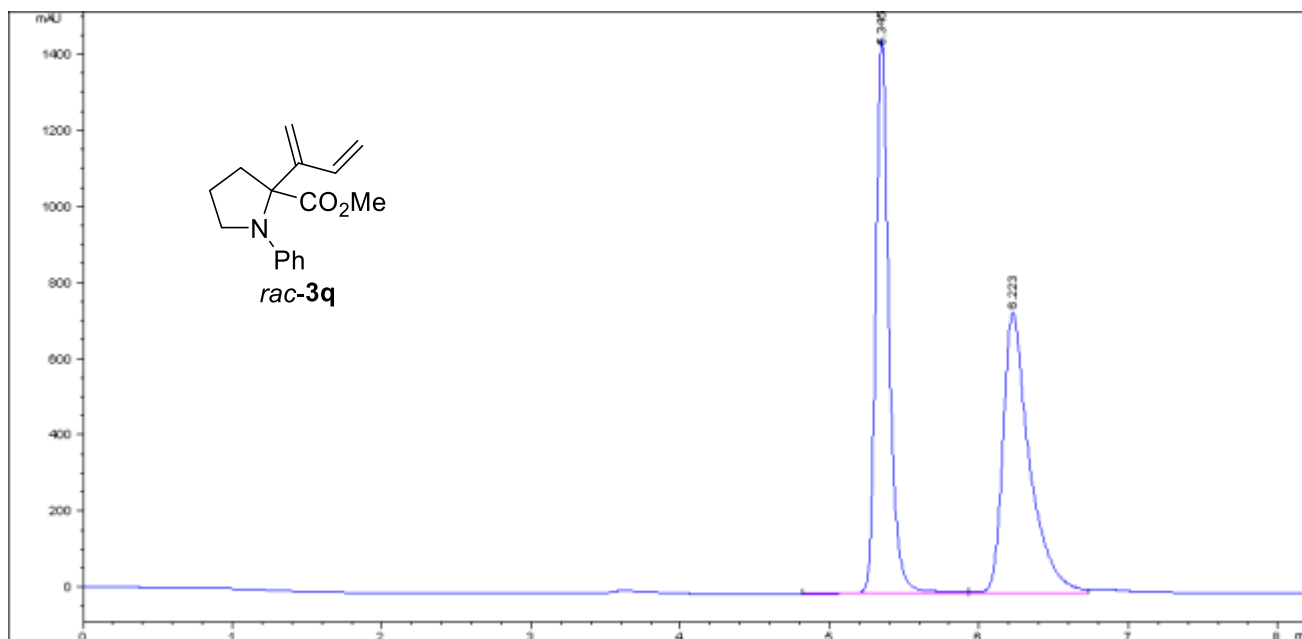

| Number | Time (min) | Area (mAU.s) | Height (mAU) | Width (min) | Symmetry factor | Area (%) |
|--------|------------|--------------|--------------|-------------|-----------------|----------|
| 1      | 5.345      | 9192.6       | 1457.9       | 0.0954      | 0.735           | 49.834   |
| 2      | 6.223      | 9253.9       | 738.2        | 0.1812      | 0.551           | 50.166   |

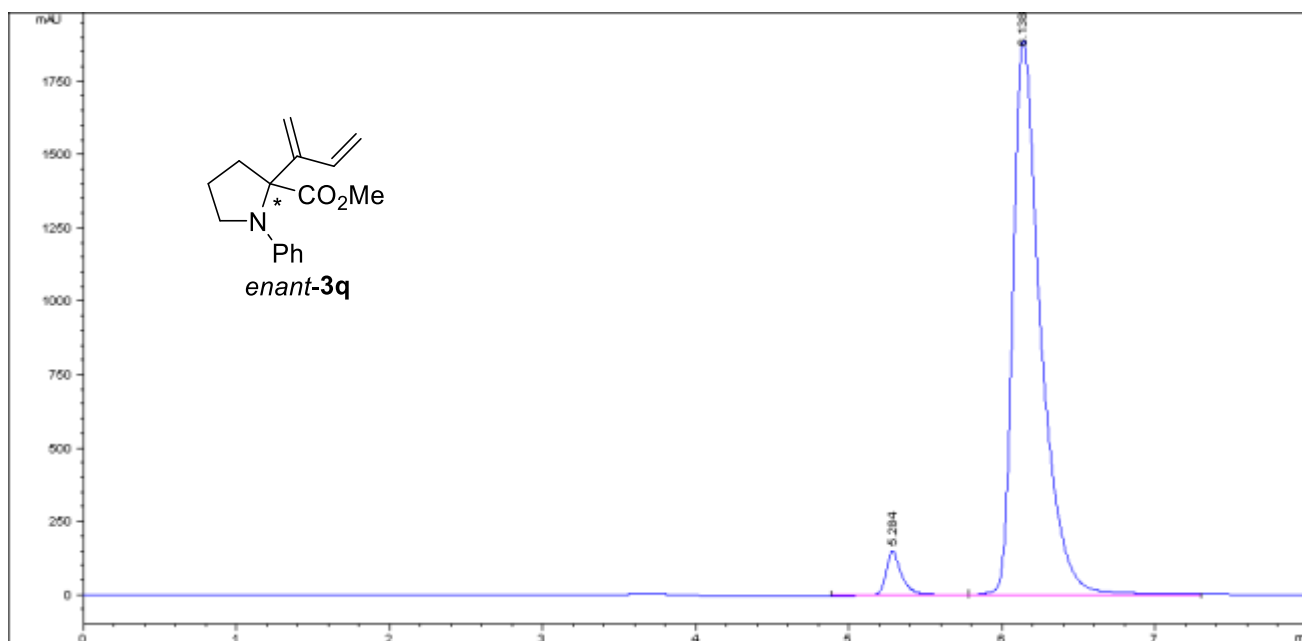

| Number | Time (min) | Area (mAU.s) | Height (mAU) | Width (min) | Symmetry factor | Area (%) |
|--------|------------|--------------|--------------|-------------|-----------------|----------|
| 1      | 5.284      | 1215.2       | 155.1        | 0.1118      | 0.616           | 4.795    |
| 2      | 6.138      | 24129.5      | 1893.6       | 0.1894      | 0.55            | 95.205   |
